# Supplementary material for: Design, synthesis, and evaluation of novel thiadiazole derivatives as potent VEGFR-2 inhibitors: a comprehensive in vitro and in silico study
Source: Royal Society of Chemistry journal article supplement (doi:10.1039/d4ra04158e), 2024-01-01
Supplement: d4ra04158e1.pdf [file d4ra04158e1.pdf]

## Design, Synthesis, and Evaluation of Novel Thiadiazole Derivatives as Potent VEGFR-2 Inhibitors: A Comprehensive *In vitro* and *In silico* Study

Ibrahim H. Eissa<sup>a\*</sup>, Walid E. Elgammal<sup>b</sup>, Hazem A. Mahdy<sup>a</sup>, Susi Zara <sup>c</sup>, Simone Carradori <sup>c</sup>, Dalal Z. Husein<sup>d</sup>, Maymounah N. Alharthi<sup>e</sup>, Ibrahim M. Ibrahim<sup>f</sup>, Eslam B. Elkaeed<sup>g\*</sup>, Hazem Elkady<sup>a</sup>, Ahmed M. Metwaly<sup>h\*</sup>

<sup>a</sup>Pharmaceutical Medicinal Chemistry & Drug Design Department, Faculty of Pharmacy (Boys), Al-Azhar University, Cairo, 11884, Egypt

<sup>b</sup>Department of Chemistry, Faculty of Science, Al-Azhar University, Nasr City, Cairo, Egypt

<sup>c</sup>Department of Pharmacy, “G. d'Annunzio” University of Chieti-Pescara, Chieti, 66100, Italy

<sup>d</sup>Chemistry Department, Faculty of Science, New Valley University, El-Kharja 72511, Egypt

<sup>e</sup> Department of Chemistry, College of Science, Princess Nourah bint Abdulrahman University, P.O. Box 84428, Riyadh 11671, Saudi Arabia

<sup>f</sup>Biophysics Department, Faculty of Science, Cairo University, Giza 12613, Egypt

<sup>g</sup> Department of Pharmaceutical Sciences, College of Pharmacy, AlMaarefa University, Riyadh 13713, Saudi Arabia

<sup>h</sup> Pharmacognosy and Medicinal Plants Department, Faculty of Pharmacy (Boys), Al-Azhar University, Cairo 11884, Egypt

### \*Corresponding authors:

#### **Ibrahim H. Eissa**

Medicinal Chemistry Department, Faculty of Pharmacy (Boys), Al-Azhar University, Cairo 11884, Egypt. Email: Ibrahim.eissa@azhar.edu.eg

#### **Ahmed M. Metwaly**

Pharmacognosy and Medicinal Plants Department, Faculty of Pharmacy (Boys), Al-Azhar University, Cairo 11884, Egypt. Email: ametwaly@azhar.edu.eg

**Eslam B. Elkaeed:** Department of Pharmaceutical Sciences, College of Pharmacy, AlMaarefa University, Riyadh 13713, Saudi Arabia. Email: ekaeed@um.edu.sa

| <b>Content</b>                       |
|--------------------------------------|
| <b>S1. Chemistry</b>                 |
| <b>S2. Biological testing</b>        |
| <b>S.3. <i>In silico</i> studies</b> |
| <b>S.4. Spectral data</b>            |

| <b>Lab code</b> | <b>Paper code</b> |
|-----------------|-------------------|
| WA-6            | <b>16</b>         |
| PH-5            | <b>20a</b>        |
| PH-6            | <b>20b</b>        |
| PH-10           | <b>21a</b>        |
| WC-10           | <b>21b</b>        |

### **S.1. Chemistry**

The chemicals, reagents, and reaction solvents used in this study were gained from Sigma-Aldrich, Alpha Chem, Fluka, and Loba and were not purified further. The melting points (mp), which have not been corrected, were measured using the SMP50 Digital Melting Point App provided by Bibby Scientific in Staffordshire. A Thermo Fisher Nicolet IS10 spectrophotometer was used to detect infrared spectra as solids on the potassium bromide disc ( $\nu_{\max}$  in  $\text{cm}^{-1}$ ) with a resolution of  $4.0 \text{ cm}^{-1}$ , covering  $4000\text{-}400 \text{ cm}^{-1}$ .  $^1\text{H-NMR}$  and  $^{13}\text{C-NMR}$  spectra (400 and 101 MHz) were recorded at the JNM-ECA 500 II Made by JEOL-JAPAN instrument through a solution of deuterated dimethyl sulfoxide. Proton chemical shifts are labeled in part per million (ppm), downfield from tetramethyl silane (TMS,  $\delta=0$ ) as an internal standard, and the following abbreviations (or a combination thereof) are used to describe splitting patterns: s, singlet; d, doublet; t, triplet; q, quartet; m, multiplet, and br, broad. The internal references used were the residual protons (2.50, 3.33 ppm for  $^1\text{H}$  NMR, and 39.9 ppm for  $^{13}\text{C}$  NMR). Mass spectra were measured with a Thermo Scientific GCMS model (Isq Lt) using the Thermo X-Calibur software (Shimadzu, Kyoto, Japan) at the Regional Center for Mycology and Biotechnology (RCMB), Al-Azhar University, Nasr City,

Cairo, Egypt. Elemental studies were conducted at the Regional Center for Microbiology and Biotechnology, Al-Azhar University, Cairo, Egypt, with results accurate to within 0.4%. Thin-layer chromatography (TLC) was carried out on silica gel plates by using DCM: MeOH (95:5%), as the eluting system. The progress of the reaction and evaluation of product purity was determined using a UV indicator at 254 nm.

***N*-4-((*E*)-1-(((*Z*)-5-Acetyl-3-(*p*-tolyl)-1,3,4-thiadiazol-2(3*H*)-ylidene)hydrazono)ethyl) phenyl) acetamide **16****

Yellow powder (yield, 74%); m.p. = 201- 202 °C. FT-IR ( $\nu$  max,  $\text{cm}^{-1}$ ): 3307 (NH), 3080, 3032, 3009 (C-H aromatic), 2922, 2863 (C-H aliphatic), 1687, 1666 (C=O);  $^1\text{H}$  NMR (400 MHz,  $\text{DMSO-}d_6$ )  $\delta$  10.15 (s, 1H, NH), 7.94 – 7.92 (m, 2H, Ar-H), 7.85 – 7.83 (m, 2H, Ar-H), 7.67 (d,  $J = 8.7$  Hz, 2H, Ar-H),

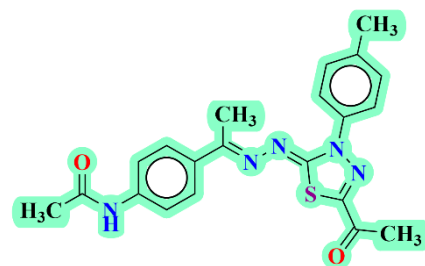

7.40 (d,  $J = 8.4$  Hz, 2H, Ar-H), 2.60 (s, 3H,  $\text{CH}_3$ ), 2.40 (s, 3H,  $\text{CH}_3$ ), 2.39 (s, 3H,  $\text{CH}_3$ ), 2.09 (s, 3H,  $\text{CH}_3$ );  $^{13}\text{C}$  NMR (101 MHz,  $\text{DMSO-}d_6$ )  $\delta$  190.2, 169.0, 164.5, 160.3, 150.8, 141.4, 137.2, 136.9, 132.2, 130.0, 127.6, 122.5, 119.0, 25.5, 24.6, 21.1, 15.6; Anal. Calcd. for  $\text{C}_{21}\text{H}_{21}\text{N}_5\text{O}_2\text{S}$  (407.49): C, 61.90; H, 5.19; N, 17.19. Found: C, 61.79; H, 5.46; N, 17.42%.

**3.1.1. General procedure for the synthesis of derivatives 20a,b and 21a,b.**

A solution of intermediates **19a,b** (1 molar) in ethanol (20 mL) was combined with triethylamine (1 molar) and the corresponding hydrazonoyl chlorides 5a,b and 8 (1 molar). The mixtures were heated for a period of 6 hours. The resulting solids were collected and subjected to purification with hexane, resulting in the desired products **20a,b** and **21a,b**, respectively.

***N*-4-((*E*)-1-(((*Z*)-5-Acetyl-3-(2-chlorophenyl)-1,3,4-thiadiazol-2(3*H*)-ylidene)hydrazono)ethyl) phenyl)benzamide **20a****

Pale yellow powder (yield, 70%); m.p. = 190-192 °C. FT-IR ( $\nu$  max,  $\text{cm}^{-1}$ ): 3353 (NH), 3062, 3001 (C-H aromatic), 2919 (C-H aliphatic), 1675, 1655 (C=O);  $^1\text{H}$  NMR (400 MHz,  $\text{DMSO-}d_6$ )  $\delta$  10.45 (s, 1H, NH), 8.01 – 7.98 (m, 4H, Ar-H), 7.89 (m, 3H, Ar-H), 7.67-7.61 (m, 3H, Ar-H), 7.59-7.54 (m,

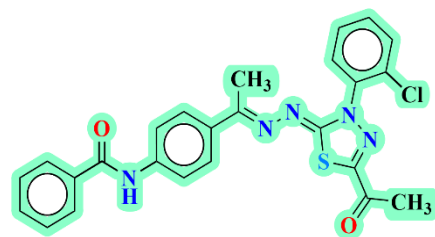

3H, Ar-H), 2.54 (s, 3H,  $\text{CH}_3$ ), 2.23 (s, 3H,  $\text{CH}_3$ );  $^{13}\text{C}$  NMR (126 MHz,  $\text{DMSO-}d_6$ )  $\delta$  190.1, 166.2, 164.2, 160.9, 151.5, 141.4, 138.3, 135.4, 132.9, 132.1, 131.6, 129.6, 128.9, 128.2, 127.5, 123.9,

120.5, 25.5, 15.8; Anal. Calcd. for C<sub>25</sub>H<sub>20</sub>ClN<sub>5</sub>O<sub>2</sub>S (489.98): C, 61.28; H, 4.11; N, 14.29. Found: C, 61.39; H, 4.24; N, 14.53%.

***N*-(4-((*E*)-1-(((*Z*)-5-Acetyl-3-(*p*-tolyl)-1,3,4-thiadiazol-2(3*H*)-ylidene)hydrazono) ethyl phenyl) benzamide 20b**

Yellow powder (yield, 78%); m.p. = 185- 187 °C. FT-IR (v max, cm<sup>-1</sup>): 3351, 3110 (NH), 3057 (C-H aromatic), 2986, 2916 (C-H aliphatic), 1746, 1706, 1655 (C=O); <sup>1</sup>H NMR (400 MHz, DMSO-*d*<sub>6</sub>) δ 10.46 (s, 1H, NH), 8.00 – 7.91 (m, 8H, Ar-H), 7.65 (d, *J* = 6.9 Hz, 1H, Ar-H), 7.57

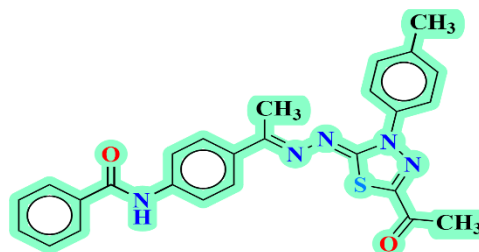

(t, *J* = 7.4 Hz, 2H, Ar-H), 7.41 (d, *J* = 8.1 Hz, 2H, Ar-H), 2.61 (s, 3H, CH<sub>3</sub>), 2.43 (s, 3H, CH<sub>3</sub>), 2.40 (s, 3H, CH<sub>3</sub>); <sup>13</sup>C NMR (101 MHz, DMSO-*d*<sub>6</sub>) δ 190.2, 166.2, 164.7, 160.3, 150.9, 141.3, 137.3, 136.9, 135.2, 132.8, 132.2, 130.0, 128.9, 128.2, 127.4, 122.6, 120.3, 25.5, 21.1, 15.7; Anal. Calcd. for C<sub>26</sub>H<sub>23</sub>N<sub>5</sub>O<sub>2</sub>S (469.56): C, 66.51; H, 4.94; N, 14.91. Found: C, 66.32; H, 5.06; N, 15.07%.

***Ethyl* (Z)-5-(((*E*)-1-(4-Benzamidophenyl)ethylidene)hydrazono)-4-(3-chlorophenyl)-4,5-dihydro-1,3,4-thiadiazole-2-carboxylate 21a**

Yellowish white powder (yield, 73%); m.p. = 230-232 °C. FT-IR (v max, cm<sup>-1</sup>): 3285 (NH), 3080, 3027 (C-H aromatic), 2981, 2955, 2918 (C-H aliphatic), 1715, 1655 (C=O); <sup>1</sup>H NMR (400 MHz, DMSO-*d*<sub>6</sub>) δ 10.47 (s, 1H, NH), 8.22 (t, *J* = 2.1 Hz, 1H, Ar-H), 8.03-7.98 (m, 3H,

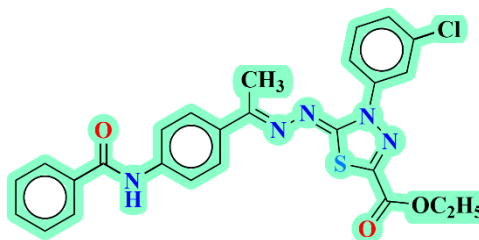

Ar-H), 7.91-7.88 (m, 4H, Ar-H), 7.65 – 7.55 (m, 4H, Ar-H), 7.49 – 7.45 (m, 1H, Ar-H), 4.43 (q, *J* = 7.1 Hz, 2H, CH<sub>2</sub>), 2.46 (s, 3H, CH<sub>3</sub>), 1.36 (t, *J* = 7.1 Hz, 3H, CH<sub>3</sub>); <sup>13</sup>C NMR (101 MHz, DMSO-*d*<sub>6</sub>) δ <sup>13</sup>C NMR (101 MHz, DMSO-*d*<sub>6</sub>) δ 166.2, 164.0, 160.9, 158.4, 143.9, 141.4, 140.4, 135.2, 133.8, 132.6, 132.2, 131.4, 128.9, 128.2, 127.5, 127.1, 121.6, 120.4, 120.3, 63.4, 15.8, 14.5; Anal. Calcd. for C<sub>26</sub>H<sub>22</sub>ClN<sub>5</sub>O<sub>3</sub>S (520.00): C, 60.05; H, 4.26; N, 13.47. Found: C, 60.29; H, 4.37; N, 13.60%.

***Ethyl (Z)-5-(((E)-1-(4-(4-Chlorobenzamido)phenyl)ethylidene)hydrazono)-4-(3-chlorophenyl)-4,5-dihydro-1,3,4-thiadiazole-2-carboxylate 21b***

Yellow powder (yield, 75%); m.p. = 203- 205 °C. FT-IR (v max, cm<sup>-1</sup>): 3310 (NH), 3077, 3000 (C-H aromatic), 2979, 2959, 2917 (C-H aliphatic), 1740, 1651 (C=O); <sup>1</sup>H NMR (400 MHz, DMSO-*d*<sub>6</sub>) δ 10.51 (s, 1H, NH), 8.04 – 8.01 (m, 2H, Ar-

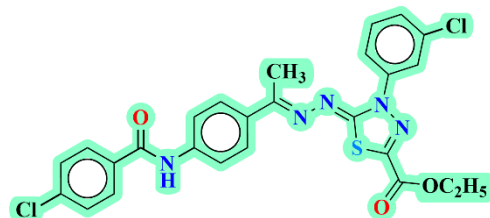

H), 7.92-7.86 (m, 6H, Ar-H), 7.66 – 7.62 (m, 2H, Ar-H), 7.38 (d, *J* = 8.2 Hz, 2H, Ar-H), 4.42 (q, *J* = 7.1 Hz, 2H), 2.42 (s, 3H, CH<sub>3</sub>), 2.39 (s, 3H, CH<sub>3</sub>), 1.35 (t, *J* = 7.1 Hz, 3H, 2.42 (s, 3H, CH<sub>3</sub>)); <sup>13</sup>C NMR (101 MHz, DMSO-*d*<sub>6</sub>) δ 164.5, 160.1, 158.6, 142.9, 141.0, 137.2, 136.8, 133.9, 133.0, 130.2, 130.0, 129.0, 127.4, 122.6, 120.4, 63.2, 21.1, 15.7, 14.5; Anal. Calcd. for C<sub>26</sub>H<sub>21</sub>Cl<sub>2</sub>N<sub>5</sub>O<sub>3</sub>S (554.45): C, 56.32; H, 3.82; N, 12.63. Found: C, 56.57; H, 3.98; N, 12.67%.

## **S2. Biological testing**

### **S.2.1. *In vitro* anti-proliferative activity**

#### **S.2.1.1. Determination of sample cytotoxicity on cells (MTT protocol)**

1-The 96 well tissue culture plate was inoculated with 1 X 10<sup>5</sup> cells / ml (100 ul / well) and incubated at 37°C for 24 hours to develop a complete monolayer sheet.

2- Growth medium was decanted from 96 well micro titer plates after confluent sheet of cells were formed, cell monolayer was washed twice with wash media.

3- two-fold dilutions of tested sample was made in RPMI medium with 2% serum (maintenance medium).

4- 0.1 ml of each dilution was tested in different wells leaving 3 wells as control, receiving only maintenance medium.

5- Plate was incubated at 37°C and examined. Cells were checked for any physical signs of toxicity, e.g. partial or complete loss of the monolayer, rounding, shrinkage, or cell granulation.

6- MTT solution was prepared (5mg/ml in PBS) (BIO BASIC CANADA INC).

8- 20ul MTT solution were added to each well. Place on a shaking table, 150rpm for 5 minutes, to thoroughly mix the MTT into the media.

9) Incubate (37C, 5% CO<sub>2</sub>) for 4 hours to allow the MTT to be metabolized.

10) Dump off the media. (dry plate on paper towels to remove residue if necessary).

- 11) Resuspend formazan (MTT metabolic product) in 200ul DMSO. Place on a shaking table, 150rpm for 5 minutes, to thoroughly mix the formazan into the solvent.
- 12) Read optical density at 560nm and subtract background at 620nm. Optical density should be directly correlated with cell quantity.

### S.2.1.2. Morphological assay

- ❖ Large-scale, morphological changes that occur at the cell surface, or in the cytoskeleton, can be followed and related to cell viability.
- ❖ Damage can be identified by large decreases in volume secondary to losses in protein and intracellular ions of due to altered permeability to sodium or potassium.
- ❖ Necrotic cells: nuclear swelling, chromatin flocculation, loss of nuclear basophilia
- ❖ Apoptotic cells: cell shrinkage, nuclear condensation, nuclear fragmentation

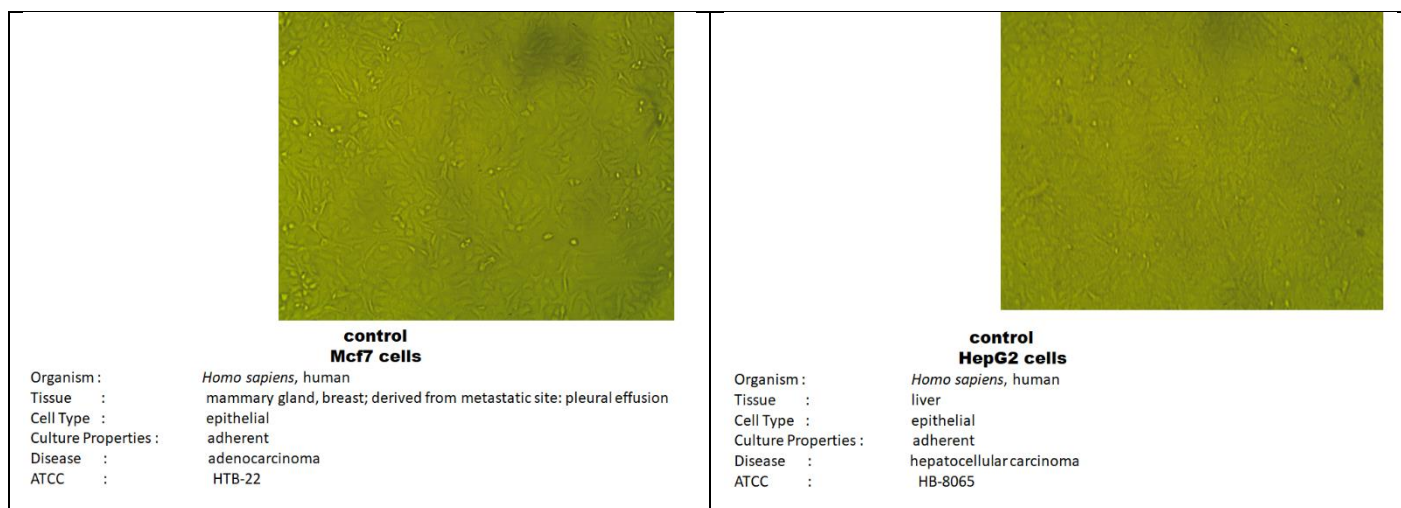

### \*\*\* Cytotoxicity of WA-6 (compound 16) against MCF-7 and HepG2

| ID   | uM    | O.D   |       |       | Mean O.D | ±SE      | Viability % | Toxicity %  | IC50 ± SD   |
|------|-------|-------|-------|-------|----------|----------|-------------|-------------|-------------|
| Mcf7 | ----- | 0.772 | 0.768 | 0.779 | 0.773    | 0.003215 | 100         | 0           | uM          |
| WA6  | 10    | 0.046 | 0.032 | 0.047 | 0.041667 | 0.004842 | 5.39025442  | 94.60974558 | 1.25 ± 0.02 |
|      | 5     | 0.173 | 0.156 | 0.162 | 0.163667 | 0.004978 | 21.17291936 | 78.82708064 |             |
|      | 2.5   | 0.263 | 0.269 | 0.271 | 0.267667 | 0.002404 | 34.62699439 | 65.37300561 |             |
|      | 1.25  | 0.388 | 0.367 | 0.393 | 0.382667 | 0.007965 | 49.50409659 | 50.49590341 |             |
|      | 0.625 | 0.659 | 0.678 | 0.666 | 0.667667 | 0.005548 | 86.37343683 | 13.62656317 |             |

|  |       |       |       |       |       |          |             |             |  |
|--|-------|-------|-------|-------|-------|----------|-------------|-------------|--|
|  | 0.312 | 0.771 | 0.764 | 0.778 | 0.771 | 0.004041 | 99.74126779 | 0.258732212 |  |
|--|-------|-------|-------|-------|-------|----------|-------------|-------------|--|

| ID    | uM    | O.D   |       |       | Mean O.D | ±SE      | Viability % | Toxicity %  | IC50 ± SD   |
|-------|-------|-------|-------|-------|----------|----------|-------------|-------------|-------------|
| HepG2 | ----- | 0.742 | 0.728 | 0.732 | 0.734    | 0.004163 | 100         | 0           | uM          |
| WA6   | 10    | 0.348 | 0.371 | 0.356 | 0.358333 | 0.006741 | 48.81925522 | 51.18074478 | 9.92 ± 0.22 |
|       | 5     | 0.643 | 0.618 | 0.632 | 0.631    | 0.007234 | 85.96730245 | 14.03269755 |             |
|       | 2.5   | 0.735 | 0.722 | 0.732 | 0.729667 | 0.00393  | 99.40962761 | 0.590372389 |             |
|       | 1.25  | 0.731 | 0.729 | 0.738 | 0.732667 | 0.002728 | 99.81834696 | 0.181653043 |             |
|       | 0.625 | 0.733 | 0.725 | 0.74  | 0.732667 | 0.004333 | 99.81834696 | 0.181653043 |             |
|       | 0.312 | 0.743 | 0.724 | 0.734 | 0.733667 | 0.005487 | 99.95458674 | 0.045413261 |             |

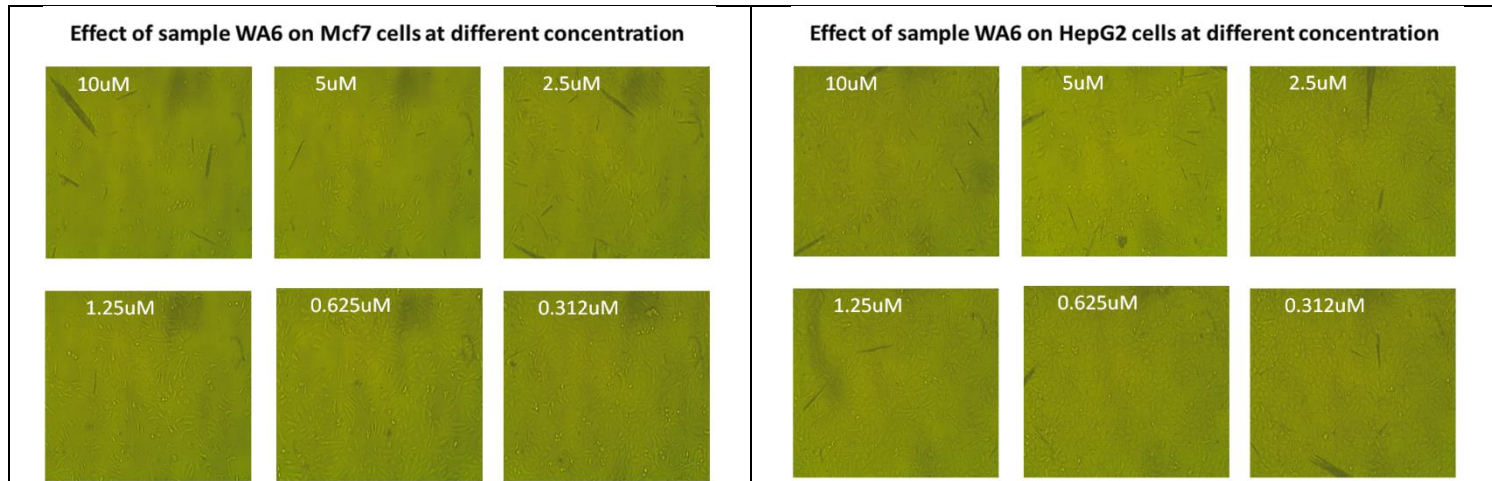

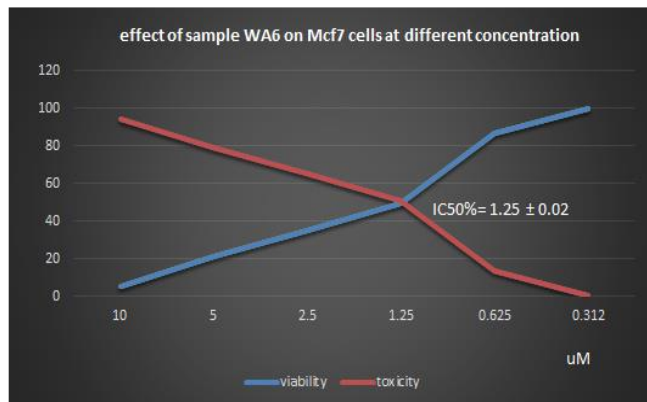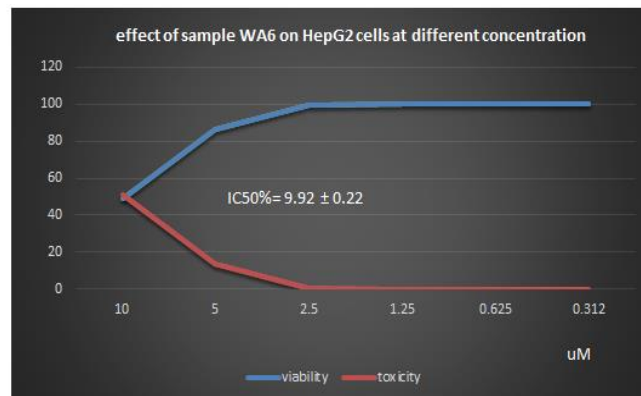

**\*\*\* Cytotoxicity of PH-5 (compound 20a) against MCF-7 and HepG2**

| ID   | uM    | O.D   |       |       | Mean O.D | ±SE      | Viability % | Toxicity %  | IC50 ± SD   |
|------|-------|-------|-------|-------|----------|----------|-------------|-------------|-------------|
| Mcf7 | ----- | 0.772 | 0.768 | 0.779 | 0.773    | 0.003215 | 100         | 0           | uM          |
| PH5  | 10    | 0.042 | 0.048 | 0.044 | 0.044667 | 0.001764 | 5.778352738 | 94.22164726 | 0.06 ± 0.01 |
|      | 5     | 0.047 | 0.05  | 0.046 | 0.047667 | 0.001202 | 6.166451056 | 93.83354894 |             |
|      | 2.5   | 0.044 | 0.043 | 0.057 | 0.048    | 0.004509 | 6.209573092 | 93.79042691 |             |
|      | 1.25  | 0.051 | 0.047 | 0.049 | 0.049    | 0.001155 | 6.338939198 | 93.6610608  |             |
|      | 0.625 | 0.06  | 0.045 | 0.048 | 0.051    | 0.004583 | 6.59767141  | 93.40232859 |             |
|      | 0.312 | 0.055 | 0.061 | 0.058 | 0.058    | 0.001732 | 7.503234153 | 92.49676585 |             |
|      | 0.156 | 0.073 | 0.069 | 0.081 | 0.074333 | 0.003528 | 9.616213885 | 90.38378611 |             |
|      | 0.078 | 0.385 | 0.377 | 0.34  | 0.367333 | 0.01386  | 47.52048297 | 52.47951703 |             |

| ID    | uM    | O.D   |       |       | Mean O.D | ±SE      | Viability % | Toxicity %  | IC50 ± SD |
|-------|-------|-------|-------|-------|----------|----------|-------------|-------------|-----------|
| HepG2 | ----- | 0.742 | 0.728 | 0.732 | 0.734    | 0.004163 | 100         | 0           | uM        |
| PH5   | 10    | 0.044 | 0.045 | 0.046 | 0.045    | 0.000577 | 6.130790191 | 93.86920981 | 0.13 ± 0  |
|       | 5     | 0.044 | 0.044 | 0.046 | 0.044667 | 0.000667 | 6.08537693  | 93.91462307 |           |
|       | 2.5   | 0.043 | 0.045 | 0.046 | 0.044667 | 0.000882 | 6.08537693  | 93.91462307 |           |
|       | 1.25  | 0.042 | 0.038 | 0.047 | 0.042333 | 0.002603 | 5.767484105 | 94.23251589 |           |
|       | 0.625 | 0.042 | 0.044 | 0.045 | 0.043667 | 0.000882 | 5.949137148 | 94.05086285 |           |



|  |       |       |       |       |          |          |             |             |  |
|--|-------|-------|-------|-------|----------|----------|-------------|-------------|--|
|  | 0.312 | 0.045 | 0.047 | 0.043 | 0.045    | 0.001155 | 6.130790191 | 93.86920981 |  |
|  | 0.156 | 0.236 | 0.22  | 0.208 | 0.221333 | 0.00811  | 30.15440509 | 69.84559491 |  |
|  | 0.078 | 0.538 | 0.512 | 0.529 | 0.526333 | 0.007623 | 71.7075386  | 28.2924614  |  |

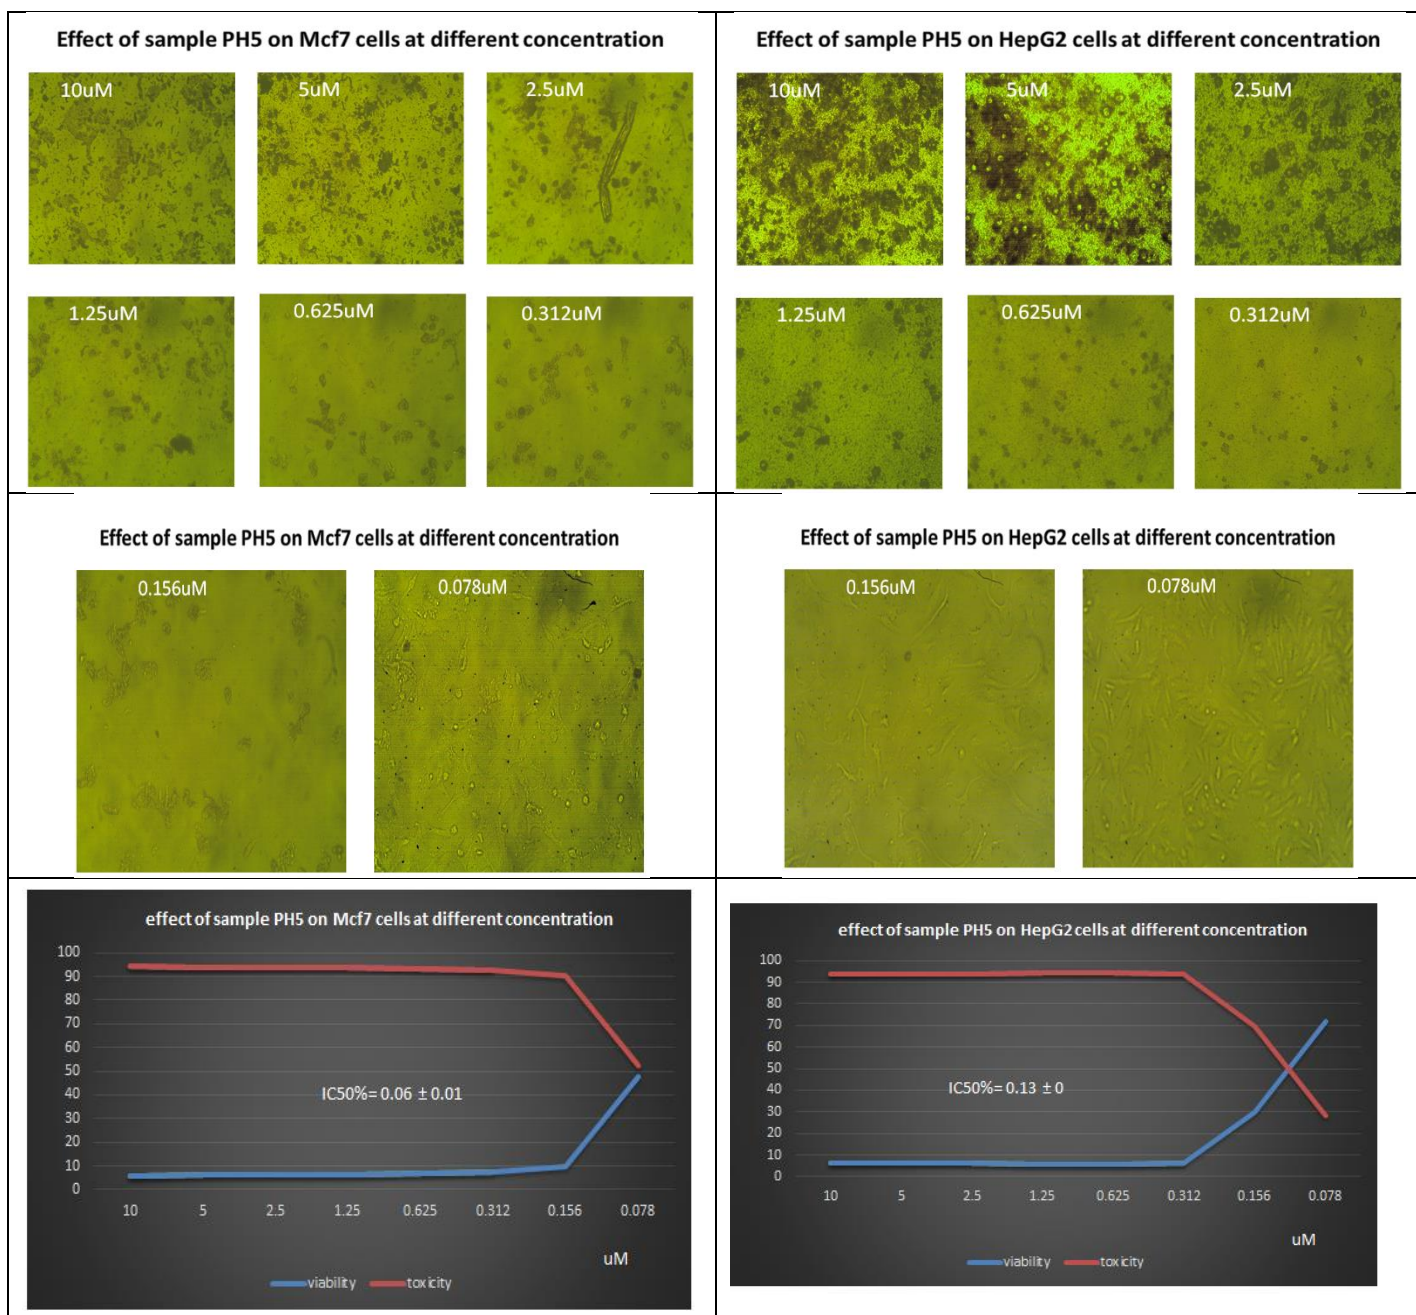

**\*\*\* Cytotoxicity of PH-6 (compound 20b) against MCF-7 and HepG2**

| ID   | uM    | O.D   |       |       | Mean O.D | ±SE      | Viability % | Toxicity %  | IC50 ± SD   |
|------|-------|-------|-------|-------|----------|----------|-------------|-------------|-------------|
| Mcf7 | ----- | 0.772 | 0.768 | 0.779 | 0.773    | 0.003215 | 100         | 0           | uM          |
| PH6  | 10    | 0.05  | 0.05  | 0.05  | 0.05     | 4.91E-18 | 6.468305304 | 93.5316947  | 0.05 ± 0.01 |
|      | 5     | 0.05  | 0.05  | 0.05  | 0.05     | 4.91E-18 | 6.468305304 | 93.5316947  |             |
|      | 2.5   | 0.05  | 0.05  | 0.05  | 0.05     | 4.91E-18 | 6.468305304 | 93.5316947  |             |
|      | 1.25  | 0.036 | 0.043 | 0.044 | 0.041    | 0.002517 | 5.304010349 | 94.69598965 |             |
|      | 0.625 | 0.032 | 0.039 | 0.04  | 0.037    | 0.002517 | 4.786545925 | 95.21345408 |             |
|      | 0.312 | 0.032 | 0.033 | 0.036 | 0.033667 | 0.001202 | 4.355325571 | 95.64467443 |             |
|      | 0.156 | 0.083 | 0.061 | 0.068 | 0.070667 | 0.006489 | 9.141871496 | 90.8581285  |             |
|      | 0.078 | 0.35  | 0.321 | 0.37  | 0.347    | 0.014224 | 44.89003881 | 55.10996119 |             |

| ID    | uM    | O.D   |       |       | Mean O.D | ±SE      | Viability % | Toxicity %  | IC50 ± SD |
|-------|-------|-------|-------|-------|----------|----------|-------------|-------------|-----------|
| HepG2 | ----- | 0.742 | 0.728 | 0.732 | 0.734    | 0.004163 | 100         | 0           | uM        |
| PH6   | 10    | 0.05  | 0.05  | 0.05  | 0.05     | 4.91E-18 | 6.811989101 | 93.1880109  | 0.14 ± 0  |
|       | 5     | 0.05  | 0.05  | 0.05  | 0.05     | 4.91E-18 | 6.811989101 | 93.1880109  |           |
|       | 2.5   | 0.05  | 0.05  | 0.05  | 0.05     | 4.91E-18 | 6.811989101 | 93.1880109  |           |
|       | 1.25  | 0.038 | 0.047 | 0.045 | 0.043333 | 0.002728 | 5.903723887 | 94.09627611 |           |
|       | 0.625 | 0.037 | 0.042 | 0.04  | 0.039667 | 0.001453 | 5.40417802  | 94.59582198 |           |
|       | 0.312 | 0.038 | 0.035 | 0.039 | 0.037333 | 0.001202 | 5.086285195 | 94.9137148  |           |
|       | 0.156 | 0.195 | 0.208 | 0.224 | 0.209    | 0.008386 | 28.47411444 | 71.52588556 |           |
|       | 0.078 | 0.549 | 0.559 | 0.513 | 0.540333 | 0.013968 | 73.61489555 | 26.38510445 |           |

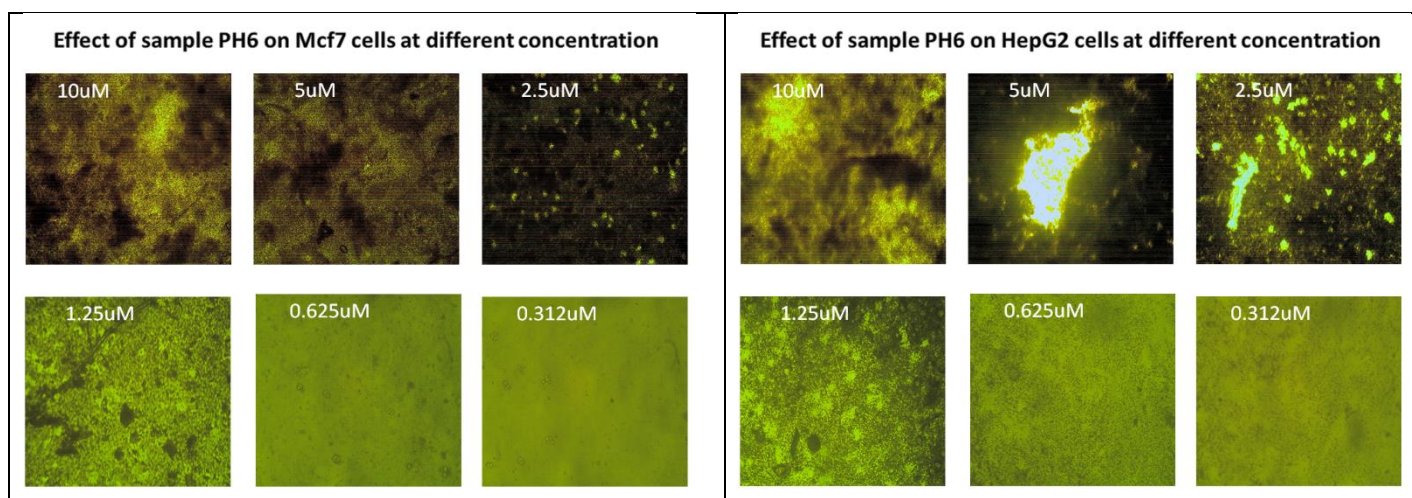

Effect of sample PH6 on Mcf7 cells at different concentration

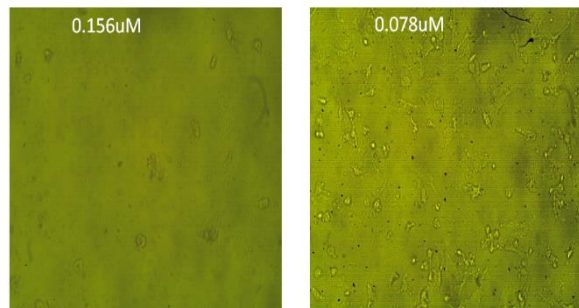

Effect of sample PH6 on HepG2 cells at different concentration

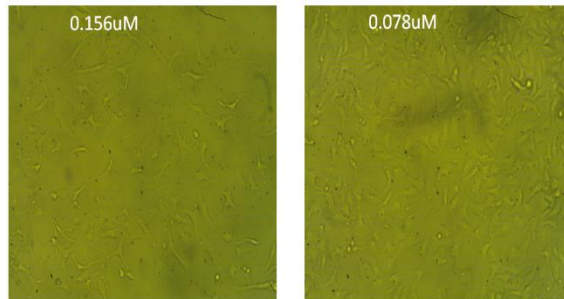

effect of sample PH6 on Mcf7 cells at different concentration

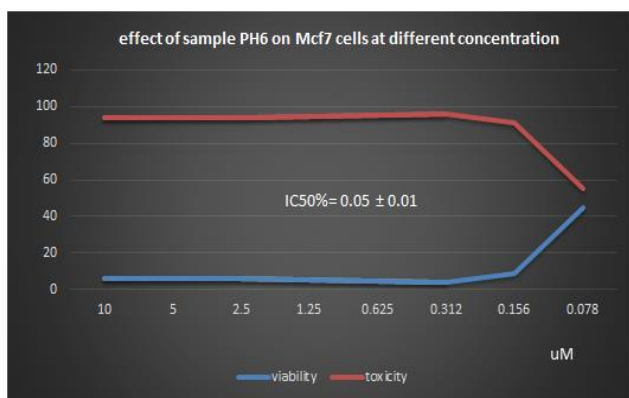

effect of sample PH6 on HepG2 cells at different concentration

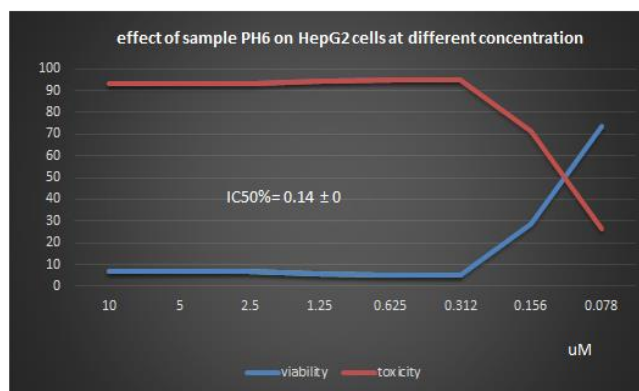

\*\*\* Cytotoxicity of PH-10 (compound 21a) against MCF-7 and HepG2

| ID    | uM    | O.D   |       |          | Mean O.D | ±SE         | Viability % | Toxicity %  | IC50 ± SD |
|-------|-------|-------|-------|----------|----------|-------------|-------------|-------------|-----------|
| Mcf7  | ----- | 0.772 | 0.768 | 0.779    | 0.773    | 0.003215    | 100         | 0           | uM        |
| PH10  | 10    | 0.019 | 0.018 | 0.019    | 0.018667 | 0.000333    | 2.41483398  | 97.58516602 | 0.19 ± 0  |
|       | 5     | 0.019 | 0.02  | 0.018    | 0.019    | 0.000577    | 2.457956016 | 97.54204398 |           |
|       | 2.5   | 0.019 | 0.022 | 0.021    | 0.020667 | 0.000882    | 2.673566192 | 97.32643381 |           |
|       | 1.25  | 0.02  | 0.022 | 0.018    | 0.02     | 0.001155    | 2.587322122 | 97.41267788 |           |
|       | 0.625 | 0.02  | 0.018 | 0.023    | 0.020333 | 0.001453    | 2.630444157 | 97.36955584 |           |
|       | 0.312 | 0.046 | 0.052 | 0.049    | 0.049    | 0.001732    | 6.338939198 | 93.6610608  |           |
|       | 0.156 | 0.462 | 0.435 | 0.477    | 0.458    | 0.012288    | 59.24967658 | 40.75032342 |           |
| 0.078 | 0.67  | 0.699 | 0.664 | 0.677667 | 0.010806 | 87.66709789 | 12.33290211 |             |           |



| ID    | uM    | O.D   |       |       | Mean O.D | ±SE      | Viability % | Toxicity %  | IC50 ± SD |
|-------|-------|-------|-------|-------|----------|----------|-------------|-------------|-----------|
| HepG2 | ----- | 0.742 | 0.728 | 0.732 | 0.734    | 0.004163 | 100         | 0           | uM        |
| PH10  | 10    | 0.024 | 0.022 | 0.02  | 0.022    | 0.001155 | 2.997275204 | 97.0027248  | 0.15 ± 0  |
|       | 5     | 0.025 | 0.021 | 0.02  | 0.022    | 0.001528 | 2.997275204 | 97.0027248  |           |
|       | 2.5   | 0.02  | 0.019 | 0.023 | 0.020667 | 0.001202 | 2.815622162 | 97.18437784 |           |
|       | 1.25  | 0.02  | 0.021 | 0.019 | 0.02     | 0.000577 | 2.72479564  | 97.27520436 |           |
|       | 0.625 | 0.019 | 0.027 | 0.024 | 0.023333 | 0.002333 | 3.178928247 | 96.82107175 |           |
|       | 0.312 | 0.026 | 0.03  | 0.022 | 0.026    | 0.002309 | 3.542234332 | 96.45776567 |           |
|       | 0.156 | 0.2   | 0.175 | 0.195 | 0.19     | 0.007638 | 25.88555858 | 74.11444142 |           |
|       | 0.078 | 0.618 | 0.588 | 0.598 | 0.601333 | 0.008819 | 81.92552225 | 18.07447775 |           |

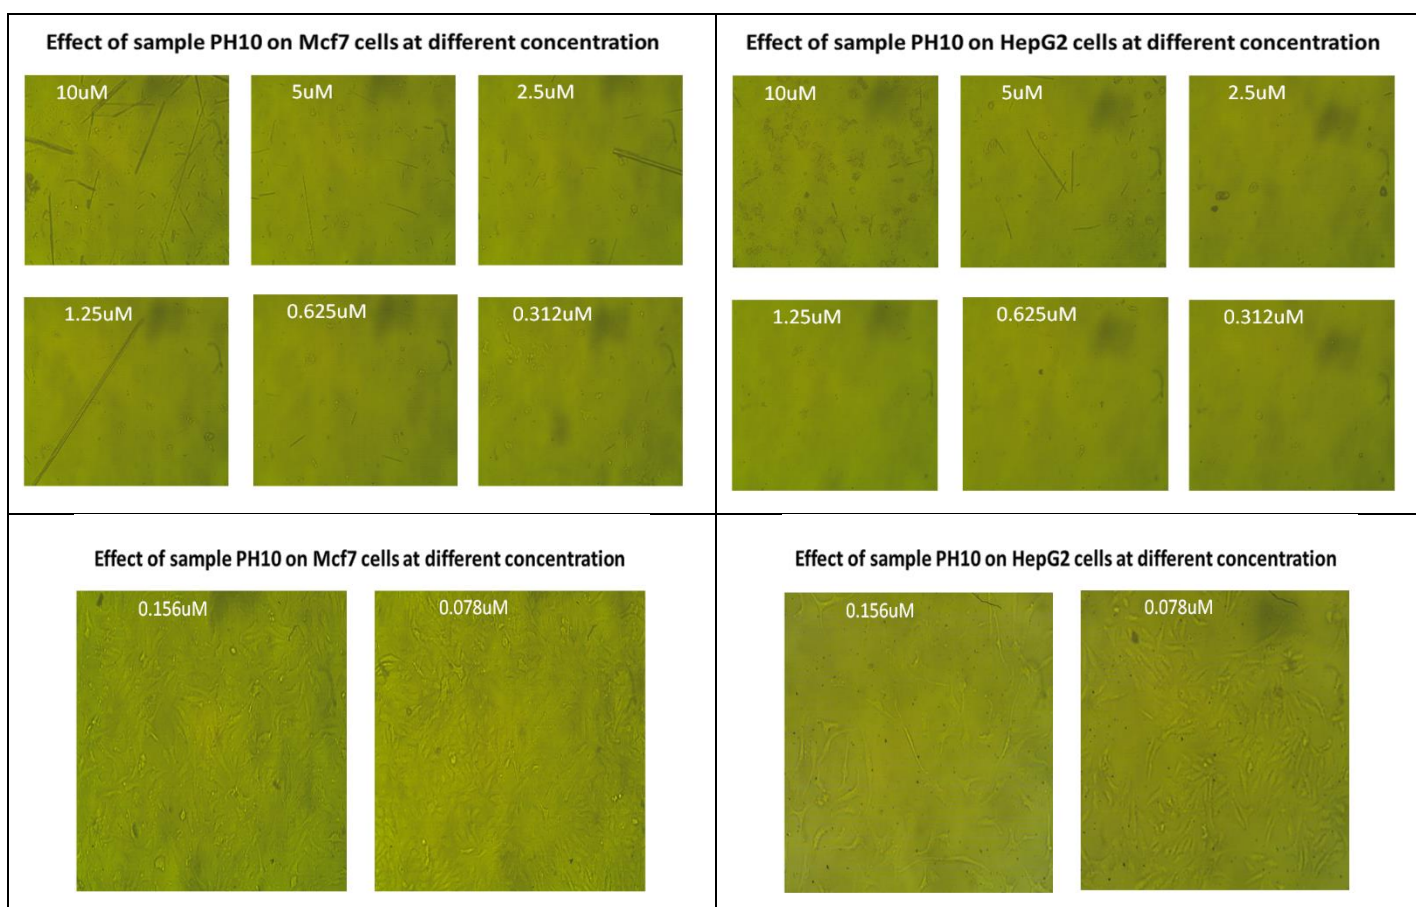

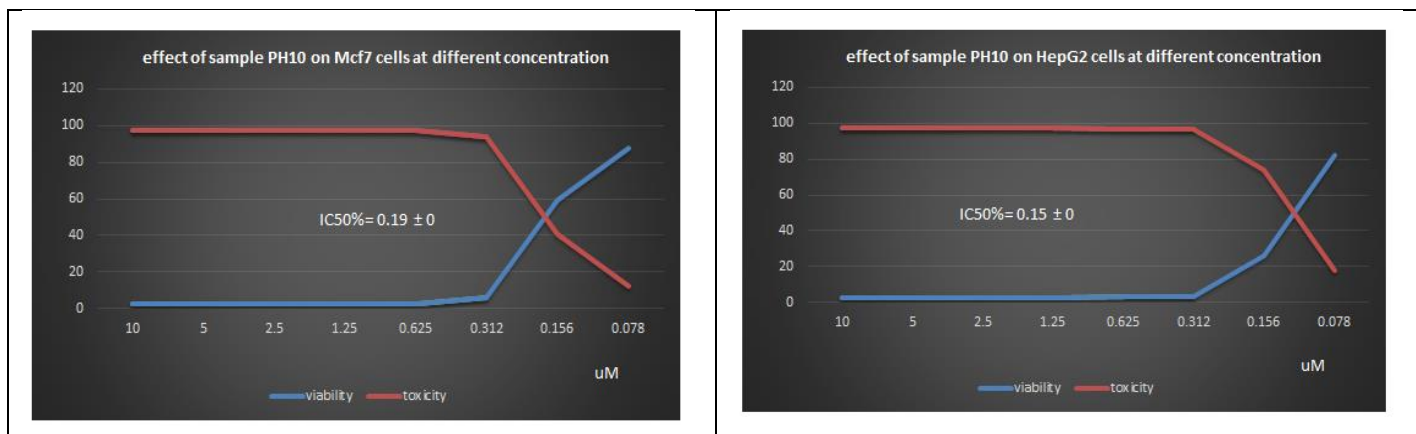

**\*\*\* Cytotoxicity of WC-10 (compound 21b) against MCF-7 and HepG2**

| ID   | uM    | O.D   |       |       | Mean O.D | ±SE      | Viability % | Toxicity %  | IC50 ± SD |
|------|-------|-------|-------|-------|----------|----------|-------------|-------------|-----------|
| Mcf7 | ----- | 0.772 | 0.768 | 0.779 | 0.773    | 0.003215 | 100         | 0           | uM        |
| WC10 | 10    | 0.033 | 0.026 | 0.027 | 0.028667 | 0.002186 | 3.708495041 | 96.29150496 | 0.14 ± 0  |
|      | 5     | 0.028 | 0.029 | 0.028 | 0.028333 | 0.000333 | 3.665373006 | 96.33462699 |           |
|      | 2.5   | 0.024 | 0.03  | 0.028 | 0.027333 | 0.001764 | 3.5360069   | 96.4639931  |           |
|      | 1.25  | 0.024 | 0.025 | 0.029 | 0.026    | 0.001528 | 3.363518758 | 96.63648124 |           |
|      | 0.625 | 0.026 | 0.034 | 0.031 | 0.030333 | 0.002333 | 3.924105218 | 96.07589478 |           |
|      | 0.312 | 0.073 | 0.076 | 0.09  | 0.079667 | 0.005239 | 10.30616645 | 89.69383355 |           |
|      | 0.156 | 0.152 | 0.188 | 0.167 | 0.169    | 0.01044  | 21.86287193 | 78.13712807 |           |
|      | 0.078 | 0.563 | 0.559 | 0.582 | 0.568    | 0.007095 | 73.47994825 | 26.52005175 |           |

| ID    | uM    | O.D   |       |       | Mean O.D | ±SE      | Viability % | Toxicity %  | IC50 ± SD   |
|-------|-------|-------|-------|-------|----------|----------|-------------|-------------|-------------|
| HepG2 | ----- | 0.742 | 0.728 | 0.732 | 0.734    | 0.004163 | 100         | 0           | uM          |
| WC10  | 10    | 0.03  | 0.03  | 0.029 | 0.029667 | 0.000333 | 4.0417802   | 95.9582198  | 0.13 ± 0.01 |
|       | 5     | 0.019 | 0.018 | 0.02  | 0.019    | 0.000577 | 2.588555858 | 97.41144414 |             |
|       | 2.5   | 0.023 | 0.019 | 0.021 | 0.021    | 0.001155 | 2.861035422 | 97.13896458 |             |
|       | 1.25  | 0.02  | 0.019 | 0.018 | 0.019    | 0.000577 | 2.588555858 | 97.41144414 |             |

|  |       |       |       |       |          |          |             |             |
|--|-------|-------|-------|-------|----------|----------|-------------|-------------|
|  | 0.625 | 0.02  | 0.02  | 0.023 | 0.021    | 0.001    | 2.861035422 | 97.13896458 |
|  | 0.312 | 0.019 | 0.026 | 0.024 | 0.023    | 0.002082 | 3.133514986 | 96.86648501 |
|  | 0.156 | 0.182 | 0.166 | 0.194 | 0.180667 | 0.00811  | 24.61398728 | 75.38601272 |
|  | 0.078 | 0.583 | 0.555 | 0.472 | 0.536667 | 0.033328 | 73.11534968 | 26.88465032 |

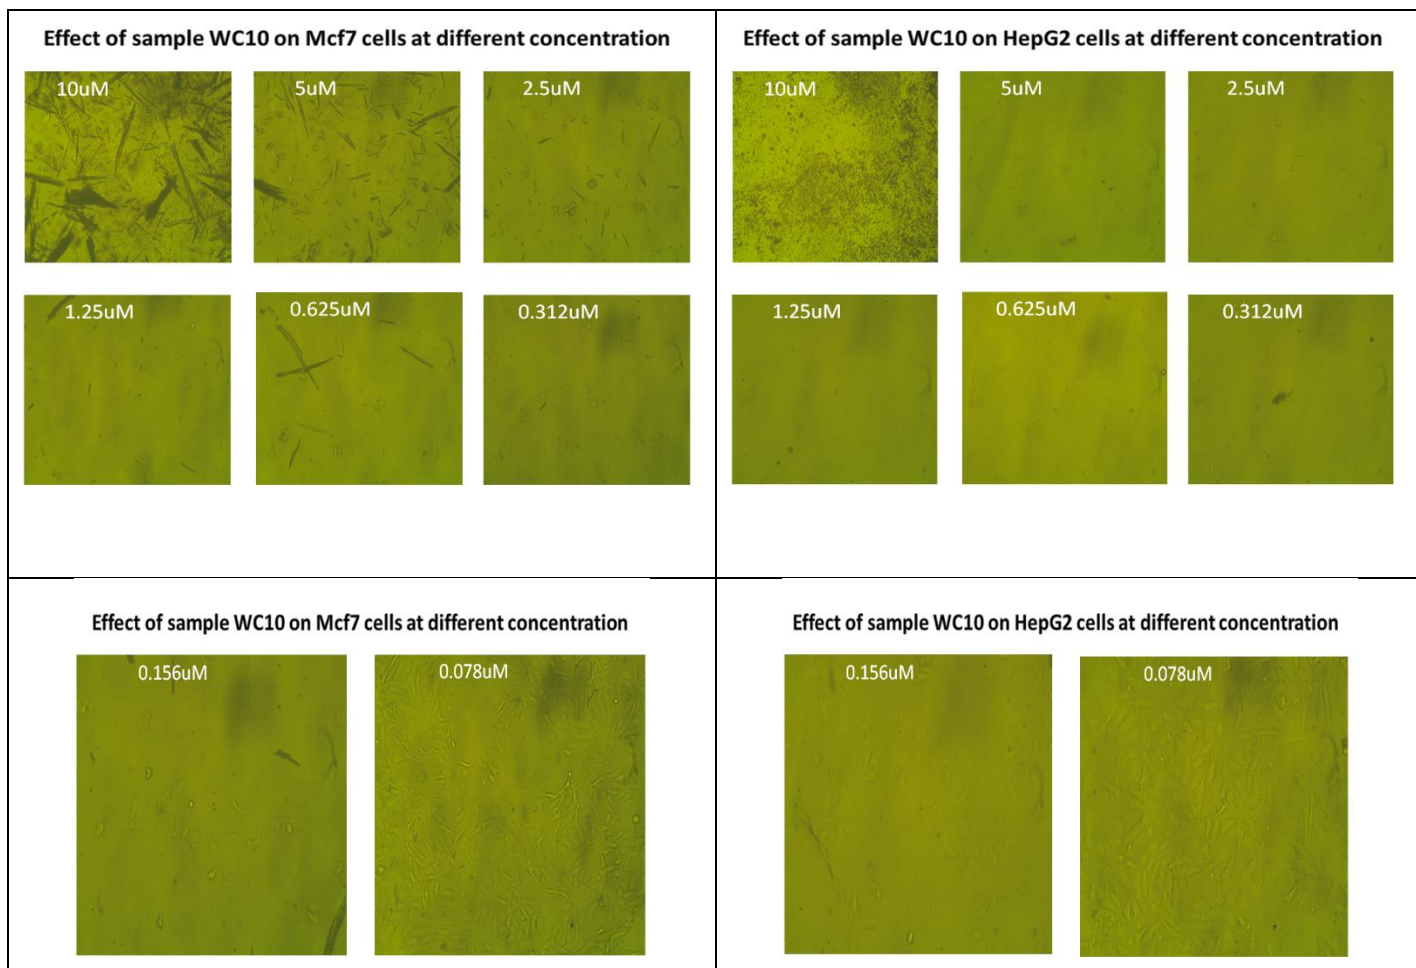

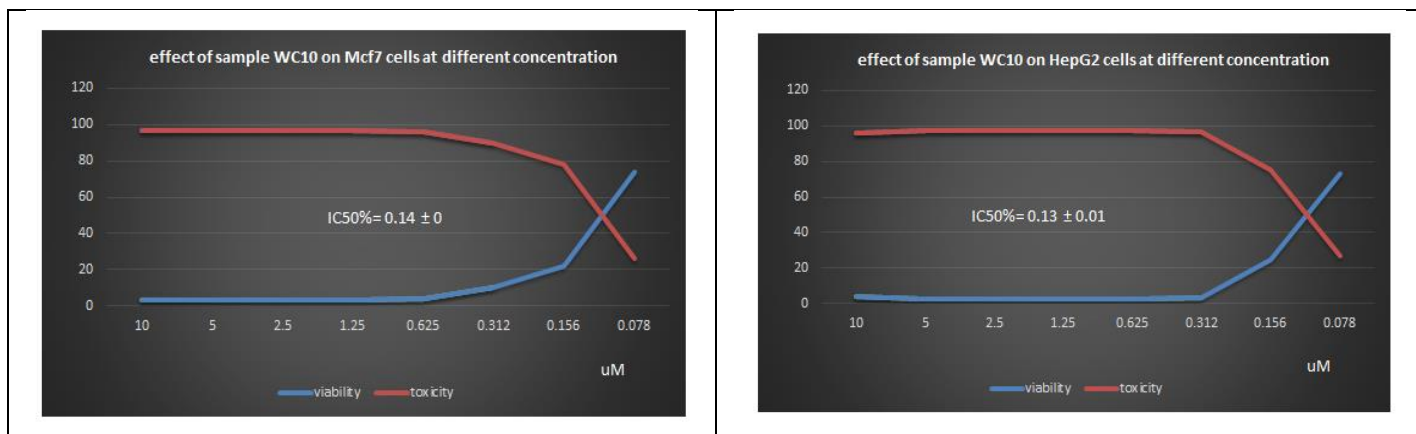

### S.2.2. Safety assay

The safety profile of compound **20b** was checked on against normal human lung cells (WI-38) to determine the treatments concentrations that do not depict toxic effects against the tested cells. A portion of 100.0  $\mu$ l of  $6 \times 10^4$  cell/ml cells was seeded into each well of a 96-well plate and then the plates were incubated at 37°C in a humidified 5.0% CO<sub>2</sub> incubator for 24 h. At the end of incubation period, the exhausted medium was replaced with 100.0  $\mu$ l of different concentrations of the designated treatment (prepared in RPMI medium starting from 1.0 mM). The inoculated plates were incubated at the same growth conditions for another 24 h. At the end of incubation, cellular viability was assessed using MTS assay kit (Promega) according to the manual instruction.

#### \*\*\* Cytotoxicity of PH-6 (compound 20b) against normal human lung cells (WI-38)

| ID   | uM    | O.D   |       |       | Mean O.D | ±SE      | Viability % | Toxicity %  | IC50 ± SD |
|------|-------|-------|-------|-------|----------|----------|-------------|-------------|-----------|
| Wi38 | ----- | 0.672 | 0.67  | 0.668 | 0.67     | 0.001155 | 100         | 0           | uM        |
| PH6  | 10    | 0.031 | 0.033 | 0.026 | 0.03     | 0.002082 | 4.47761194  | 95.52238806 | 0.19 ± 0  |
|      | 5     | 0.033 | 0.036 | 0.03  | 0.033    | 0.001732 | 4.925373134 | 95.07462687 |           |
|      | 2.5   | 0.021 | 0.022 | 0.027 | 0.023333 | 0.001856 | 3.482587065 | 96.51741294 |           |
|      | 1.25  | 0.027 | 0.03  | 0.031 | 0.029333 | 0.001202 | 4.378109453 | 95.62189055 |           |

|  |       |       |       |       |          |          |             |             |
|--|-------|-------|-------|-------|----------|----------|-------------|-------------|
|  | 0.625 | 0.04  | 0.027 | 0.036 | 0.034333 | 0.003844 | 5.124378109 | 94.87562189 |
|  | 0.312 | 0.077 | 0.082 | 0.079 | 0.079333 | 0.001453 | 11.84079602 | 88.15920398 |
|  | 0.156 | 0.352 | 0.341 | 0.368 | 0.353667 | 0.007839 | 52.78606965 | 47.21393035 |
|  | 0.078 | 0.611 | 0.638 | 0.597 | 0.615333 | 0.012032 | 91.84079602 | 8.15920398  |

**Effect of sample PH6 on wi38 cells at different concentration**

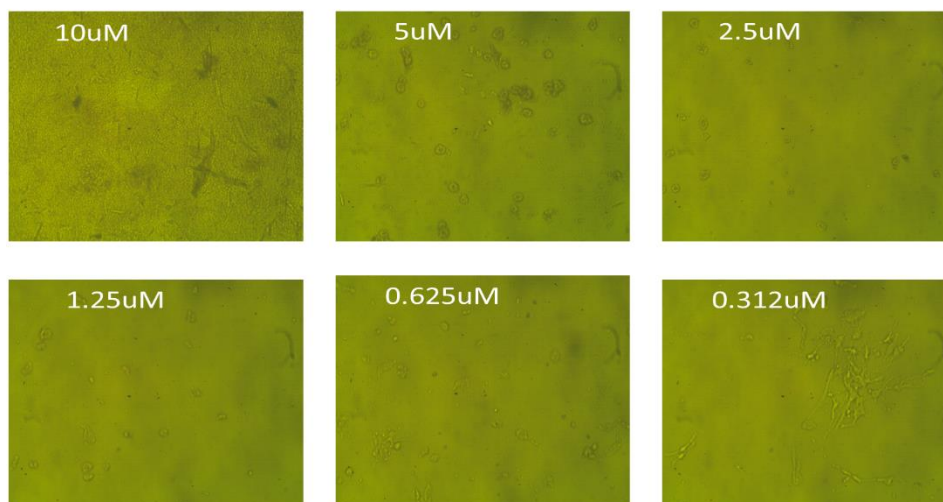

**Effect of sample PH6 on wi38 cells at different concentration**

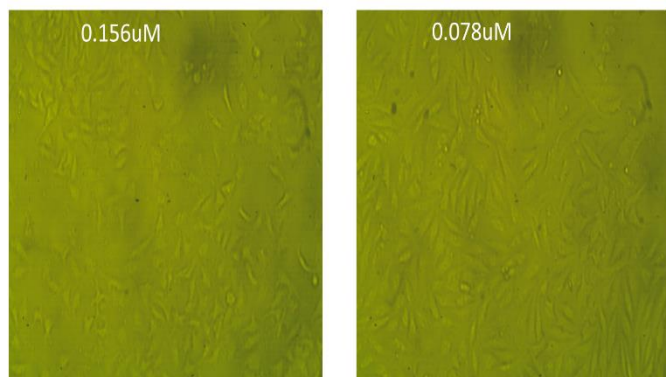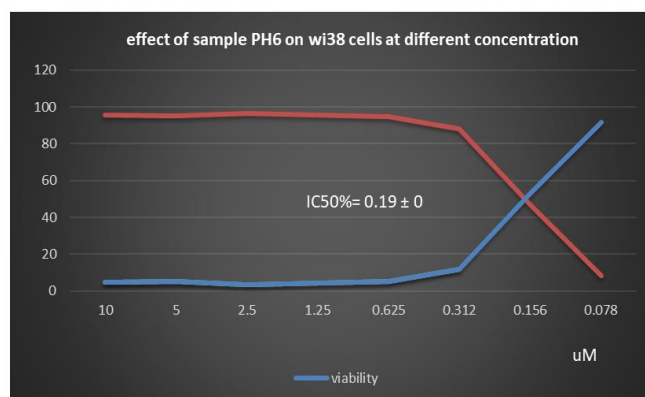

### S.2.3. *In vitro* VEGFR-2 inhibition

Inhibitory activity of compound **20b** against VEGFR-2 was evaluated using Human VEGFR-2 ELISA kit (VEGFR2(KDR) Kinase Assay Kit Catalog # 40325)(BPS Bioscience, San Diego, USA). A specific antibody for VEGFR-2 was seeded on a 96-well plate and 100  $\mu$ L of the standard solution or the tested compound was added, all were incubated at room temperature for 2.5 hours. Then washed, 100  $\mu$ L of the prepared biotin antibody was added, then incubated at room



temperature for additional 1 hour. Washed, 100  $\mu$ L of streptavidin solution was added then incubated for 45 min. at room temperature. Washed again, 100  $\mu$ L of TMB Substrate reagent was added and incubated for 30 min. at room temperature. 50  $\mu$ L of the stop solution was added, then read at 450 nm immediately. The standard curve was drawn, concentrations on the X-axis and the absorbance on the Y-axis.

## VEGFR2

| code                                                                                | IC50 | conc | log | %inh | T2 | T1 | $\Delta$ T | RFU2  | RFU1 | $\Delta$ RFU | slope | K.Activity |
|-------------------------------------------------------------------------------------|------|------|-----|------|----|----|------------|-------|------|--------------|-------|------------|
| PH6                                                                                 |      | 100  | 2   | 95.7 | 30 | 0  | 30         | 4.33  | 0    | 4.33         | 3.333 | 5.196      |
| 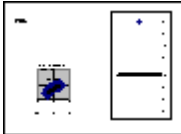   |      | 10   | 1   | 87.7 | 30 | 0  | 30         | 12.29 | 0    | 12.29        | 3.333 | 14.748     |
|                                                                                     |      | 1    | 0   | 75.3 | 30 | 0  | 30         | 24.66 | 0    | 24.66        | 3.333 | 29.592     |
|                                                                                     |      | 0.1  | -1  | 60.2 | 30 | 0  | 30         | 39.81 | 0    | 39.81        | 3.333 | 47.772     |
|                                                                                     |      | 0.01 | -2  | 41.2 | 30 | 0  | 30         | 58.75 | 0    | 58.75        | 3.333 | 70.5       |
|                                                                                     | EC   |      |     |      | 0  | 30 | 0          | 30    | 100  | 0            | 100   | 3.333      |
|                                                                                     |      |      |     |      |    |    |            |       |      |              |       |            |
| Sorafenib                                                                           |      | 100  | 2   | 95.7 | 30 | 0  | 30         | 4.29  | 0    | 4.29         | 3.333 | 5.148      |
|  |      | 10   | 1   | 89   | 30 | 0  | 30         | 11.03 | 0    | 11.03        | 3.333 | 13.236     |
|                                                                                     |      | 1    | 0   | 75.8 | 30 | 0  | 30         | 24.16 | 0    | 24.16        | 3.333 | 28.992     |
|                                                                                     |      | 0.1  | -1  | 57.4 | 30 | 0  | 30         | 42.55 | 0    | 42.55        | 3.333 | 51.06      |
|                                                                                     |      | 0.01 | -2  | 36.4 | 30 | 0  | 30         | 63.62 | 0    | 63.62        | 3.333 | 76.344     |
|                                                                                     | EC   |      |     |      | 0  | 30 | 0          | 30    | 100  | 0            | 100   | 3.333      |
|                                                                                     |      |      |     |      |    |    |            |       |      |              |       |            |

### S.2.4. Kinase profiling test

- The in vitro inhibitory activity of compound **20b** against CDK8, PIK3 $\alpha$ , BRAF & EGFR kinases enzyme activities was accomplished using Assay Kits (BPS Bioscience, USA) at different eight dilutions of 1000, 300, 100, 30, 10, 3, 1, and 0.3 nM prepared in DMSO.
- The activities of Kinases were observed by measuring chemiluminescence using BioTek™ Synergy2 Microplate Reader (BioTek, USA).
- Different standards were used.
- All samples and controls were verified in triplicates to calculate the concentration that caused 50% inhibition of the kinase activity.

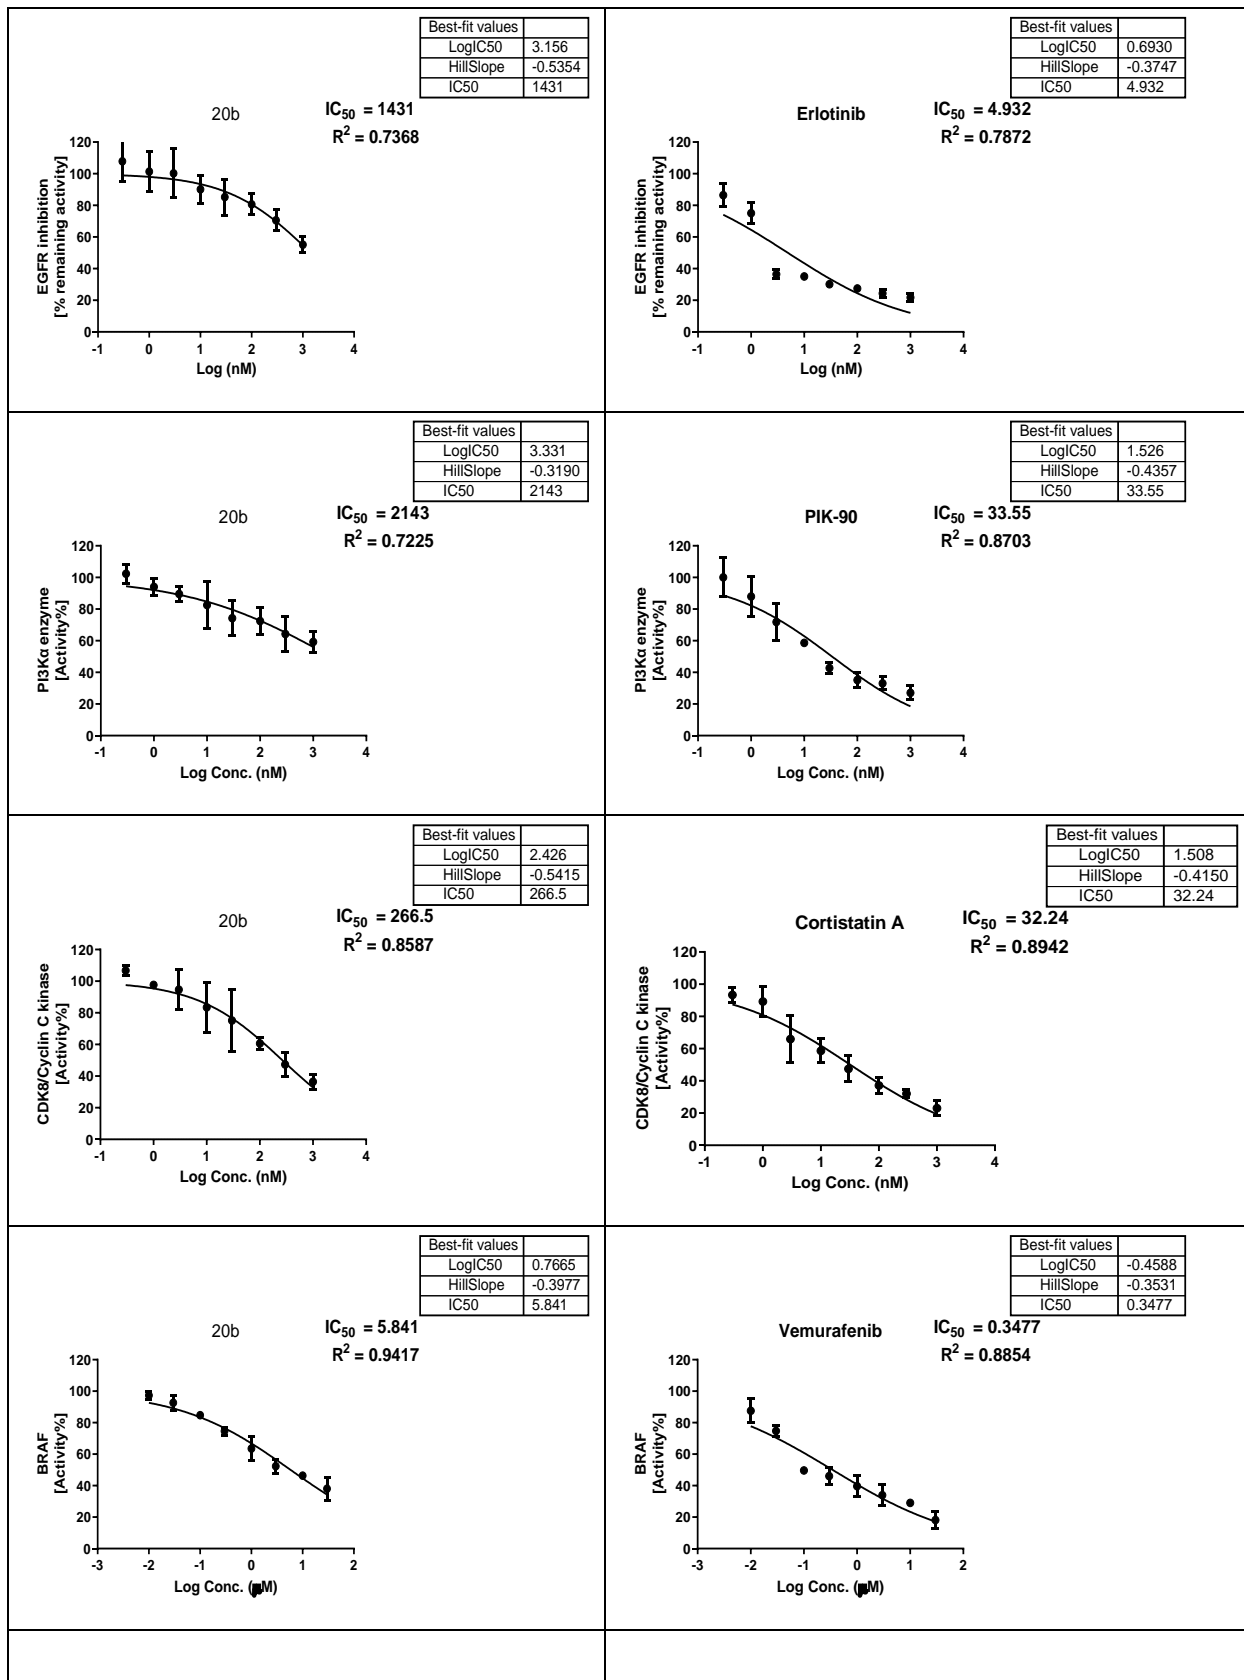

### S.2.5. Cell cycle analysis

The MCF-7 cells were distributed at a density of  $2.5 \times 10^5$  cells per flask on to the tissue culture flasks (T-75 flask; Nunc A/S) containing RPMI-1640 medium supplemented with 2 % FBS. After incubation for 72h with compound **20b** at a concentration of 0.06  $\mu\text{M}$ , the cells were washed thrice with ice-cold PBS buffer and fixed in 70 % cold ethyl alcohol at  $-20^\circ\text{C}$  overnight. The contents from each of the flask were then centrifuged at  $12,000 \times g$  for 20 min followed by washing and treatment with 100  $\mu\text{l}$  PBS containing 1 mM RNase A (Qiagen, Hilden, Germany). After incubation for 45 min at  $37^\circ\text{C}$ , the cells were stained with 400  $\mu\text{l}$  propidium iodide (PI; 50  $\mu\text{g/ml}$ ; Sigma-Aldrich) for 30 min. The cells were filtered through a 40- $\mu\text{m}$  nylon mesh (BD Biosciences, San Jose, CA, USA), and the DNA content was analyzed using Epics XL-MCL™ Flow Cytometer.

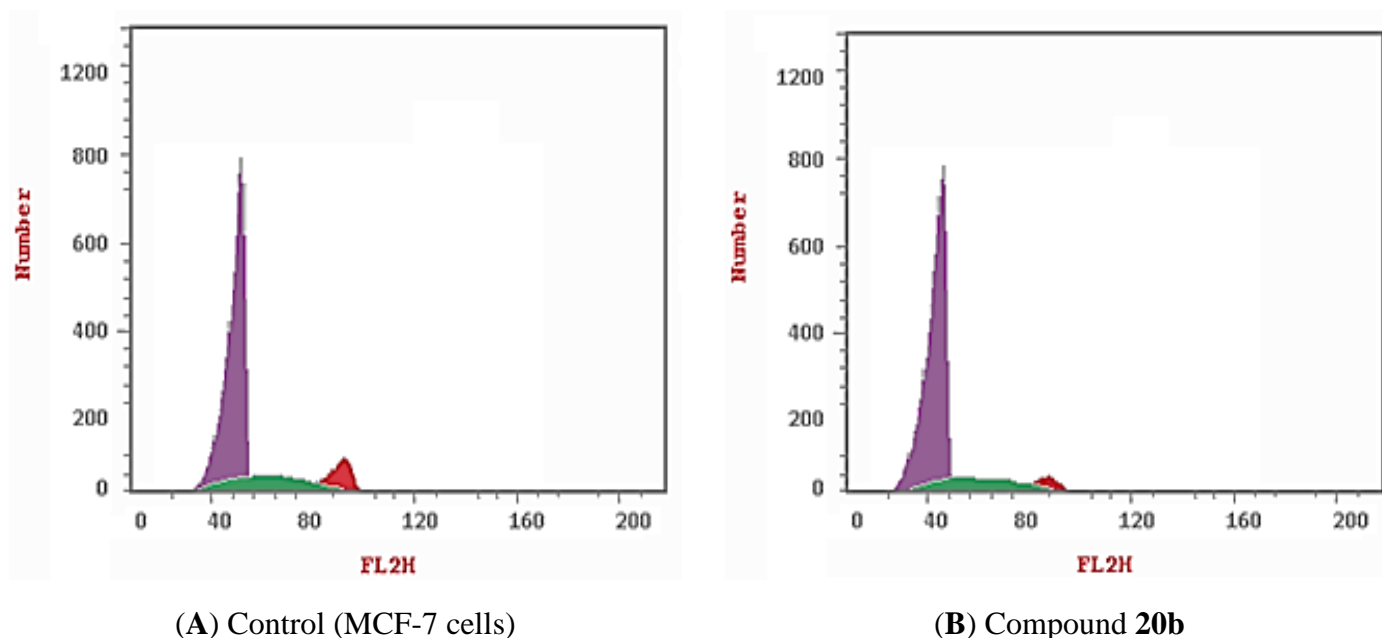

**Fig. S1.** The distribution of MCF-7 cells across the cell cycle phases was assessed using flow cytometry. Panel (A) represents the control condition, while panel (B) illustrates the influence of compound **20b** on the cell cycle distribution.

### S.2.6. Apoptosis analysis

The annexin V externalization assay for apoptosis was performed using flow cytometry after treatment MCF-7 cells with compound **20b** (at concentrations of 0.06  $\mu\text{M}$ ) for 72 h as described in the vendor's protocol (BD Pharmingen, BD Biosciences, San Jose, USA). Briefly, untreated and cells treated with compound **20b**, from 60 to 70% confluent plates were trypsinized, washed in PBS and resuspended ( $1 \times 10^6$  cells/ml) in binding buffer (10 mM HEPES, pH 7.4, 140 mM NaCl, 2.5 mM  $\text{CaCl}_2$ ). A fraction (100  $\mu\text{l}/1 \times 10^5$  cells) of the cell suspension was incubated with 5  $\mu\text{l}$  annexin V conjugated to FITC and 5  $\mu\text{l}$  propidium iodide (PI) for 15 min at 25  $^\circ\text{C}$  in the dark. 400  $\mu\text{l}$  of binding buffer was added to the suspension and apoptosis was measured immediately using a Becton Dickinson FACScan analyzer as described by Raza *et al.*, 2008. The apoptotic cells were estimated as the percentage of cells that stained positive for Annexin V-FITC while remaining impermeable to PI (AV+/PI-). This method also distinguished viable cells (AV-/PI-) and cells undergoing necrosis (AV+/PI+).

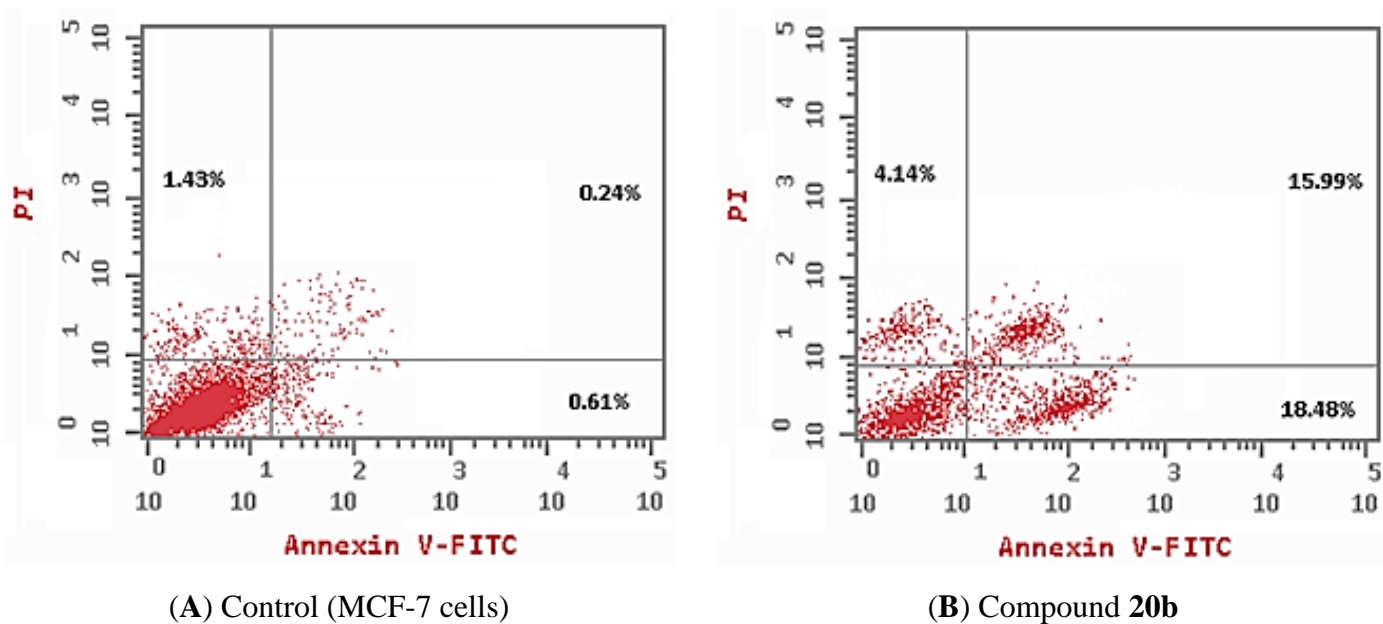

**Fig. S2.** Compound **20b** triggered apoptosis in MCF-7 cells. Panel (A) represents the control condition, while panel (B) illustrates the impact of compound **20b** on inducing apoptosis.

### S.2.7. *In vitro* assay for caspase-8, caspase-9 using RT-PCR Technique

The molecular anticancer mode of action of compound **20b** was investigated by screening their ability to affect the level of caspase-8 and caspase-9 using specific forward and reverse primers and RTq-PCR technique in MCF-7 cells (chosen as the most sensitive cancer cell line). After cellular treatment, MCF-7 cell line was cultured into 12 well plates ( $6 \times 10^3$  cell/ml) for 24 hour at a concentration of 0.06  $\mu$ M. After treatment, total RNA extraction was performed using RNA extraction kit (Qiagen, Germany). Then, 1  $\mu$ g of the obtained RNA was used to synthesize cDNA using cDNA synthesis kit (Promega Corporation, Madison, USA) as recommended by the manufacturer. Simultaneously, GAPDH was used as internal control. The RTq-PCR was done using SYBR Green dye (QuantiTect SYBR Green PCR Kits) and Light Cycler fluorimeter (Bio-RAD S1000 Tm thermal cycler). The PCR cycling program was as follows: 95°C for 2 min, followed by 40 cycles of 95°C for 30s, 55°C for 30 s, and 60°C for 45s, and finally 60°C for 5 min.

#### The sequences for primers used in quantitative Real Time Reverse-Transcriptase PCR (qRT-PCR)

| <u>Primers</u> |                                     |
|----------------|-------------------------------------|
| Casp8          | : F 5'- AGAAGAGGGTCATCCTGGGAGA-3',  |
| Casp8          | : R 5'- TCAGGACTTCCTTCAAGGCTGC-3'.  |
| Casp9          | : F 5'- GTTTGAGGACCTTCGACCAGCT -3', |
| Casp9          | : R 5'- CAACGTACCAGGAGCCACTCTT -3'. |
| GAPDH          | : F 5'- GTCTCCTCTGACTTCAACAGCG-3'   |
| GAPDH          | : R 5'- ACCACCCTGTTGCTGTAGCCAA-3'   |

| Sample | Gene Expression |            |     |
|--------|-----------------|------------|-----|
|        | Control cells   | Test cells | FLD |

MCF7

| Ser | code    | Conc | GAPDH | Casp8 | $\Delta$ CTC | GAPDH | Casp8 | $\Delta$ CTE | $\Delta\Delta$ CT          | $2^{\Delta\Delta$ CT |
|-----|---------|------|-------|-------|--------------|-------|-------|--------------|----------------------------|----------------------|
|     |         |      | HC    | TC    | TC-HC        | HE    | TE    | TE-HE        | $\Delta$ CTE- $\Delta$ CTC | E=1.872              |
| 1   | PH6     |      | 21.66 | 33.61 | 11.95        | 21.85 | 31.84 | 9.99         | -1.96                      | 3.4176               |
| 2   | Control |      | 21.66 | 33.61 | 11.95        | 21.66 | 33.61 | 11.95        | 0                          | 1                    |

MCF7

| Ser | code    | Conc | GAPDH | Casp9 | $\Delta$ CTC | GAPDH | Casp9 | $\Delta$ CTE | $\Delta\Delta$ CT          | $2^{\Delta\Delta$ CT |
|-----|---------|------|-------|-------|--------------|-------|-------|--------------|----------------------------|----------------------|
|     |         |      | HC    | TC    | TC-HC        | HE    | TE    | TE-HE        | $\Delta$ CTE- $\Delta$ CTC | E=1.872              |
| 1   | PH6     |      | 21.66 | 33.95 | 12.29        | 21.85 | 31.44 | 9.59         | -2.7                       | 5.4353               |
| 2   | Control |      | 21.66 | 33.95 | 12.29        | 21.66 | 33.95 | 12.29        | 0                          | 1                    |

### S3. *In silico* studies

#### S3.1. Docking studies

**Protein Preparation:** The crystal structure of VEGFR-2 [PDB ID: 2OH4, resolution: 2.05 Å] was obtained from Protein Data Bank (<https://www.rcsb.org>). At first, the crystal structure of the VEGFR-2 complexed with the co-crystallized ligand was prepared by removing crystallographic water molecules. Only one chain was retained besides the co-crystallized ligand. The selected protein chain was protonated using the following setting. The used electrostatic functional form was GB/VI with a distance cut-off of 15 Å. The used value of the dielectric constant was 2 with an 80 dielectric constant of the used solvent. The used Van der Waals functional form was 800R3 with a distance cut-off of 10 Å. Then, the energy of the protein chain was minimized using Hamiltonian AM1 implanted in Molecular Operating Environment (MOE 2019 and MMFF94x (Merck molecular force field) for structural optimization. Next, the active site of the target protein was defined for ligand docking and redocking (in case of validation of docking protocol). The

active site of the protein was identified as the residues that fall within the 5 Å distance from the perimeter of the co-crystallized ligand.

**Ligand Preparation:** 2D structures of the synthesized compounds and the standard compound, sorafenib were drawn using ChemBioDraw Ultra 14.0 and saved in MDL-SD file format. The 3D structures of the ligands were protonated, and the structures were optimized by energy minimization using MM2 force-field and 10000 iteration steps of 2 fs. The conformationally optimized ligands were used for docking studies.

**Docking Setup and Validation of Docking Protocol:** The protein-ligand docking studies were carried out using MOE version 2019. Validation of the docking protocol was carried out by redocking the co-crystallized reference ligand against the isolated pocket of VEGFR-2. The docking protocol was validated by comparing the heavy atoms RMSD value of the re-docked ligand pose with the corresponding co-crystallized reference ligand structure.

The docking setup for the tested compounds was established according to the protocol followed in the validation step. For each docking run, 30 docked solutions were generated using ASE for scoring function and rigid receptor for refinement. The pose with ideal binding mode was selected for further investigations. The docking results were visualized using Discovery Studio (DS) 4.0. Analysis of the docking results was carried out by comparing the interactions and docking score obtained for the docked ligands with that of the re-docked reference molecule.

### **S.3.2. MD simulations**

To assess the robustness of the VEGFR-2\_22 complex and to compare the structure of the apo and holo protein, a 100 ns classical unbiased MD simulation was run in GROMACS 2021. We utilized the solution builder module of the CHARMM-GUI server to generate the input files. Using the transferable intermolecular potential 3 points (TIP3P) water model, we solvated and centered the apo protein and the docked complex in a cube of 8.3 nm in length with 1 nm of padding, and then neutralized the system with NaCl ions at a concentration of 0.154 M. The VEGFR-2 protein's amino acid parameters, the TIP3P water model, and the neutralizing ions were all obtained with the help of the CHARMM36m force field. Parameters for compound **20b** were calculated with the help of the CHARMM general force field (CGenFF).

We utilized GROMACS 2021 to perform the dynamics and used periodic boundary conditions

(PBCs) in all three spatial dimensions. The potential energy of the system was minimized so that atomic collisions may be avoided. During the equilibration process, the temperature was brought to 310 K and the pressure was brought to 1 atm. In detail, the minimizing step was set to be converged at 100,000 minimization steps or when the maximum force on any atom was 100 KJ.mol<sup>-1</sup>.nm<sup>-1</sup>. By using the Velocity Rescale technique, we were able to achieve thermal equilibrium in a canonical (NVT) ensemble. For pressure equilibration, we employed a Berendsen barostat with the isothermal-isobaric (NPT) ensemble. The production run in an NPT ensemble was started for 100 ns with the Nose-Hoover thermostat at 310 degrees Kelvin and the Parrinello-Rahman barostat set at 1 atm. The LINear Constraint Solver (LINCS) was used to impose length constraints on the hydrogen-bonded atoms . We utilized Particle Mesh Ewald (PME) to calculate the electrostatics with a threshold of 1.2 nm. By using a time step of 1 femtosecond during equilibration and 2 femtoseconds during production, the Newtonian equations of motion were integrated using the leap-frog algorithm. One thousand frames were captured at 0.1 ns intervals throughout the simulation. We centered the protein in the middle of the simulation box and made it whole again using the trjconv command and then analyzed it using VMD TK scripts. VEGFR-2 and **22** root mean square deviation (RMSD) values were determined. Root mean square fluctuation (RMSF), the radius of gyration (RoG), the ligand-protein center of mass separation, and the number of hydrogen bonds were all computed to see their dynamic behavior with time.

### **MM-GBSA**

When calculating the ligand's binding energy, we utilized the Molecular Mechanics-Generalized Born Surface Area (MM-GBSA) method implemented in the gmx\_MMPBSA program. In addition, decomposition analysis was carried out to calculate the binding energy contributed by each amino acid within 1 nm of the ligand. An ionic strength of 0.154 M and a solvation method (igb) value of 5 were selected. The dielectric constant was set to 1.0 inside and 78.5 outside the structure. The MM-GBSA approach is shown in Equation 1.

$$\Delta G = \langle G_{\text{complex}} - (G_{\text{receptor}} + G_{\text{ligand}}) \rangle \quad \text{Equation 1}$$

Where < > represents the average of the enclosed free energies of complex, receptor, and ligand over the frames used in the calculation. In our approach, we used the whole trajectory (a total of 1000 frames). Different energy terms can be calculated according to Equations 2 to 6 as follows:



$$\Delta G_{\text{binding}} = \Delta H - T\Delta S \quad \text{Equation 2}$$

$$\Delta H = \Delta E_{\text{gas}} + \Delta E_{\text{sol}} \quad \text{Equation 3}$$

$$\Delta E_{\text{gas}} = \Delta E_{\text{ele}} + \Delta E_{\text{vdW}} \quad \text{Equation 4}$$

$$\Delta E_{\text{solv}} = E_{\text{GB}} + E_{\text{SA}} \quad \text{Equation 5}$$

$$E_{\text{SA}} = \gamma \cdot \text{SASA} \quad \text{Equation 6}$$

Where:

$\Delta H$  is the enthalpy which can be calculated from gas-phase energy ( $E_{\text{gas}}$ ) and solvation-free energy ( $E_{\text{sol}}$ ).  $-T\Delta S$  is the entropy contribution to the free binding energy.  $E_{\text{gas}}$  is composed of electrostatic and van der Waals terms;  $E_{\text{ele}}$ ,  $E_{\text{vdW}}$ , respectively.  $E_{\text{sol}}$  can be calculated from the polar solvation energy ( $E_{\text{GB}}$ ) and nonpolar solvation energy ( $E_{\text{SA}}$ ) which is estimated from the solvent-accessible surface area.

### ProLIF Analysis

we monitored which amino acids interacted with the ligand and how often using the python package Protein-Ligand Interaction Fingerprints (ProLIF). We next used TTclust to cluster the trajectories, and the obtained representative frames were used with the Protein-Ligand interaction profiler (PLIP) to extract the interactions as 3D conformations.

The ProLIF technique was employed to identify amino acids engaged in ligand interactions and their occurrence frequency. For sorafenib, 13 amino acids were detected with hydrophobic binding frequencies surpassing 80%. Specific amino acids crucial for compound interactions were pinpointed, including Leu838 (91.2%), Lys866 (87.9%), Ile886 (92.9%), Val846 (98.6%), Leu887 (95.1%), Val897 (88.9%), Val914 (99.7%), Ile890 (95.2%), Leu1017 (95.4%), Leu1033 (91%), His1024 (86.6%), Cys1043 (99.8%), and Asp1044 (99.3%). These high percentages underscore their pivotal role in interactions and highlight their significance in binding within the complex (**Fig. S3**). Moreover, Asp1044 exhibited an 88.2% hydrogen bond rate. On the other hand, compound 20b interacted with 12 amino acids predominantly through hydrophobic interactions, each with a frequency of at least 80% (**Fig. S4**). These amino acids include Leu838 (95.7%), Val846 (99.9%), Ala864 (100%), Val865 (99.3%), Lys866 (97.9%), Leu887 (96%), Val897

(100%), Val914 (99.9%), Leu1033 (99.4%), Cys1043 (99.9%), Asp1044 (99.9%), and Phe1045 (89.2%). Notably, Asp1044 also showed a higher rate of hydrogen bond formation (97.1%) compared to sorafenib. Nine of these 12 amino acids were common with sorafenib, indicating a similar mode of interaction. Furthermore, six of these amino acids exhibited stronger contributions compared to sorafenib, as depicted in **Fig. S3**.

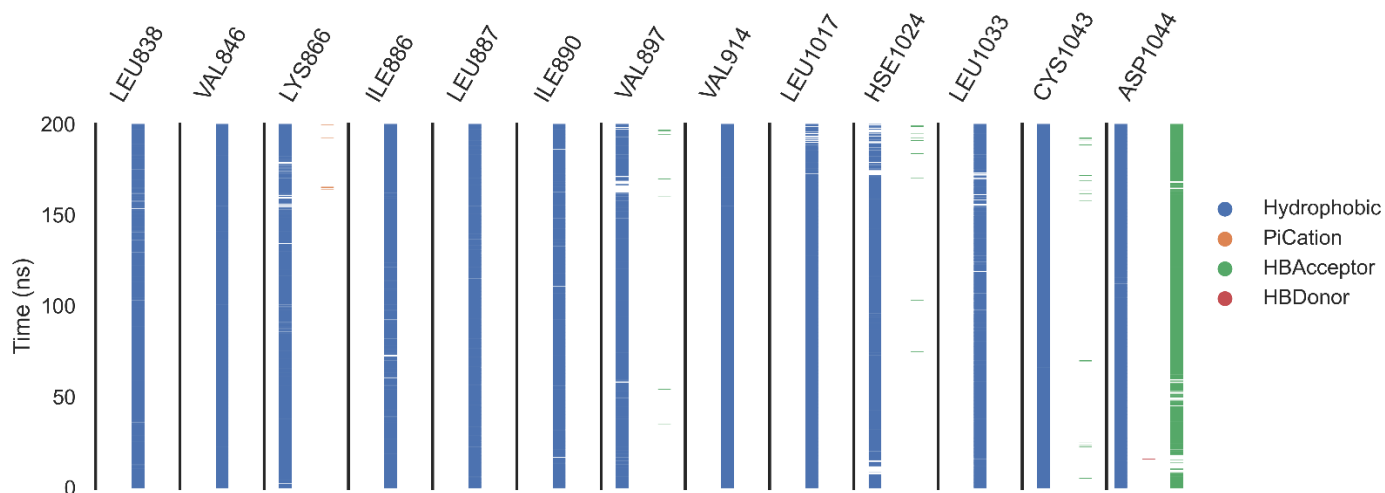

**Fig. S3.** a comprehensive depiction of the amino acids, the interactions' nature, and their frequency throughout the entire simulation period of VEGFR-2\_sorafenib complex, as analyzed through the ProLIF Python library.

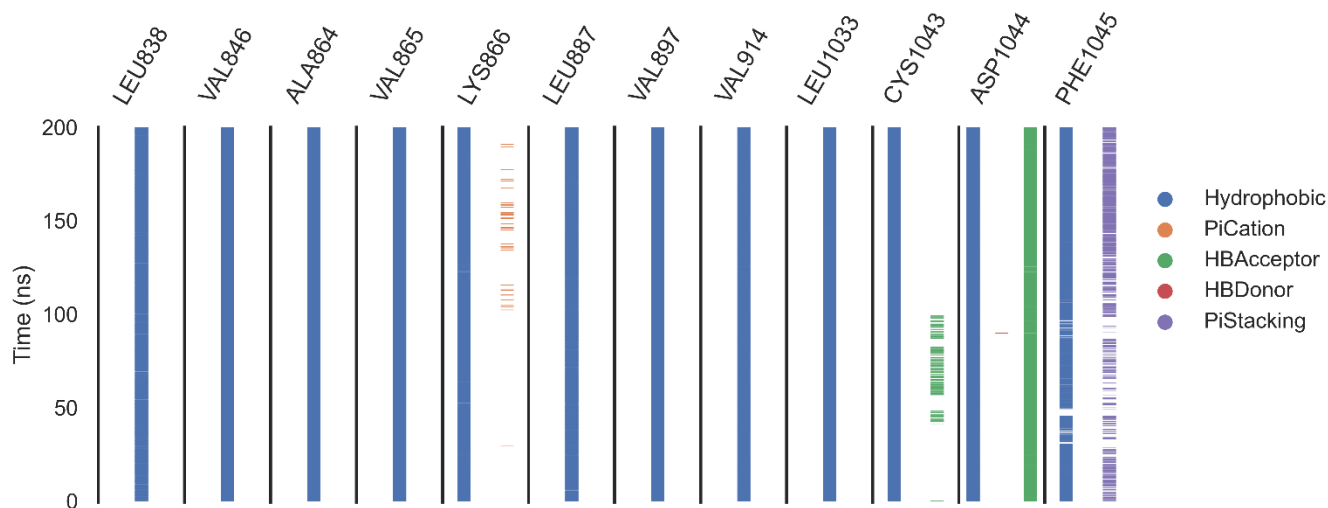

**Fig. S4.** a comprehensive depiction of the amino acids, the interactions' nature, and their frequency throughout the entire simulation period of VEGFR-2\_20b complex, as analyzed through the ProLIF Python library.

### Principal Component Analysis:

When the mass-weighted covariance matrix (C) of the positional fluctuations of a subset of atoms in a protein is analyzed using a Principal Component Analysis (PCA), the presence of coordinated motion at large amplitudes in MD trajectories becomes apparent. The alpha carbon atoms of amino acids Glu826:Leu1161 were used in the PCA analysis as a subset of atoms to detect the coordinated motion (15). After equilibration, the protein's configuration in each trajectory was used as the reference structure while performing the analyses that used a single trajectory. In contrast, the last frame from the equilibration of the apo system was chosen as the reference for the concatenated trajectory analyses. The PCA technique, in particular, uses the information revealed by diagonalizing the C matrix to determine the eigenvectors and eigenvalues that define the atomic motions' direction and amplitude. For any given system, the first PC displays the largest motion, whereas subsequent PCs show smaller motions. We were able to analyze the C matrix in GROMACS by utilizing the `gmx covar` command to diagonalize the matrix and the `gmx anaev` command to complete the analysis.

Essential subspace size was determined based on the cumulative eigenvalues with respect to the number of eigenvectors used, where the variance maintained by the selected eigenvectors was shown. Additionally, the scree plot was made by plotting the eigenvalue of each eigenvector against its index number. Moreover, it is well known that the distribution of the initial eigenvectors does not follow a Gaussian distribution. Therefore, this was used as an additional criterion in determining the number of eigenvectors of the essential subspace.

For each principal component ( $p_i$ ) of the covariance matrix, the cosine content ( $c_i$ ) may be calculated from the C matrix; this absolute value goes from 0 (no cosine) to 1 (perfect cosine). The equation of cosine content is as follows:

$$c_i = \frac{2}{T} \left( \int \cos(i\pi t p_i(t) dt) \right)^2 \left( \int p_i^2(t) dt \right)^{-1}$$

Where T is the time of the simulation. Insufficient sampling has been associated with abnormally high  $c_i$  values, which indicate random motion. The large-scale behavior of proteins is similar to diffusion when the cosine content of the first few PCs is close to 1. All trajectories' cosine contents

were calculated by analyzing the first 10 PCs.

Principal Component Analysis (PCA) was employed to detect coordinated movements. The determination of the reduced subspace size was guided by several criteria detailed in the methods section, including the examination of the scree plot, distribution of eigenvectors, and cumulative variance captured by additional eigenvectors. The scree plot clearly shows a change in slope starting from the 2nd principal component (PC). The first eigenvector alone explained nearly 81% of the total variance, while the combined contribution of the first three eigenvectors accounted for approximately 90% of the overall variance (**Fig. S5**). It's noteworthy that the distribution of the first three PCs deviated from a Gaussian pattern (**Fig. S6**). Therefore, it was decided to utilize the top three eigenvectors as representatives of the fundamental subspace.

To assess the level of randomness in the behavior of the initial ten eigenvectors, the cosine content was computed for both systems (**Fig. S7**). The analysis revealed that, with the exception of the second principal component in the VEGFR-2\_20b system and the sixth PC in VEGFR-2\_sorafenib, the cosine content of the first 10 eigenvectors remained below 0.2 in both systems. Moreover, the Root Mean Square Inner Product (RMSIP) indicated a limited overlap between the two subspaces, particularly for the first three eigenvectors, with a value of 18%. Additionally, the RMSIP analysis demonstrated only a 27% similarity between the C matrices of the two systems, suggesting distinctive sampling characteristics for each system.

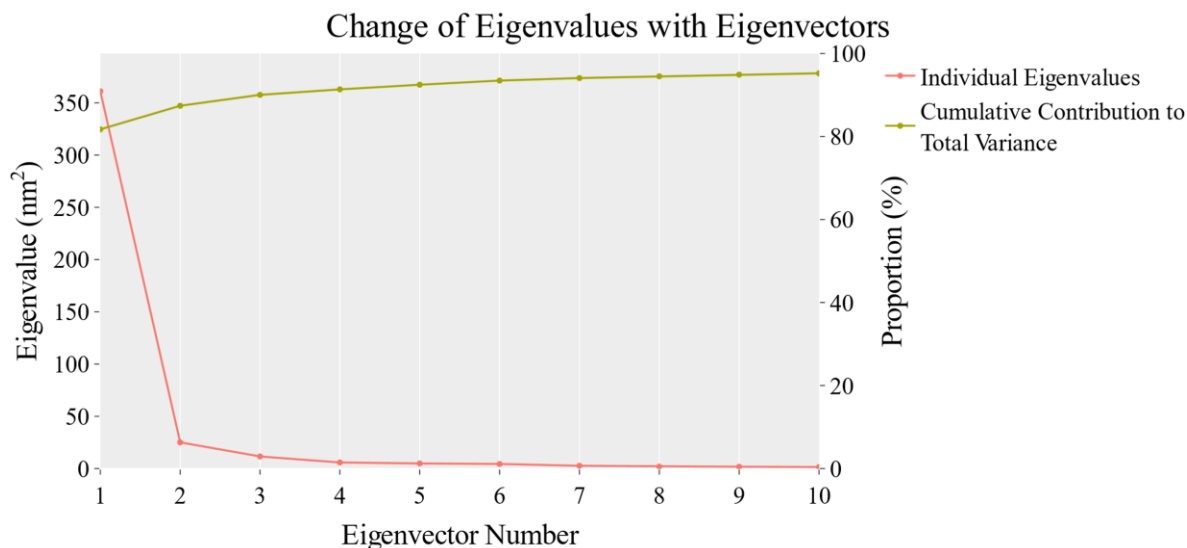

**Fig. S5.** the variation in eigenvalues as the number of eigenvectors increases (blue line). Furthermore, it illustrates the cumulative retained variance in the eigenvectors (red line).

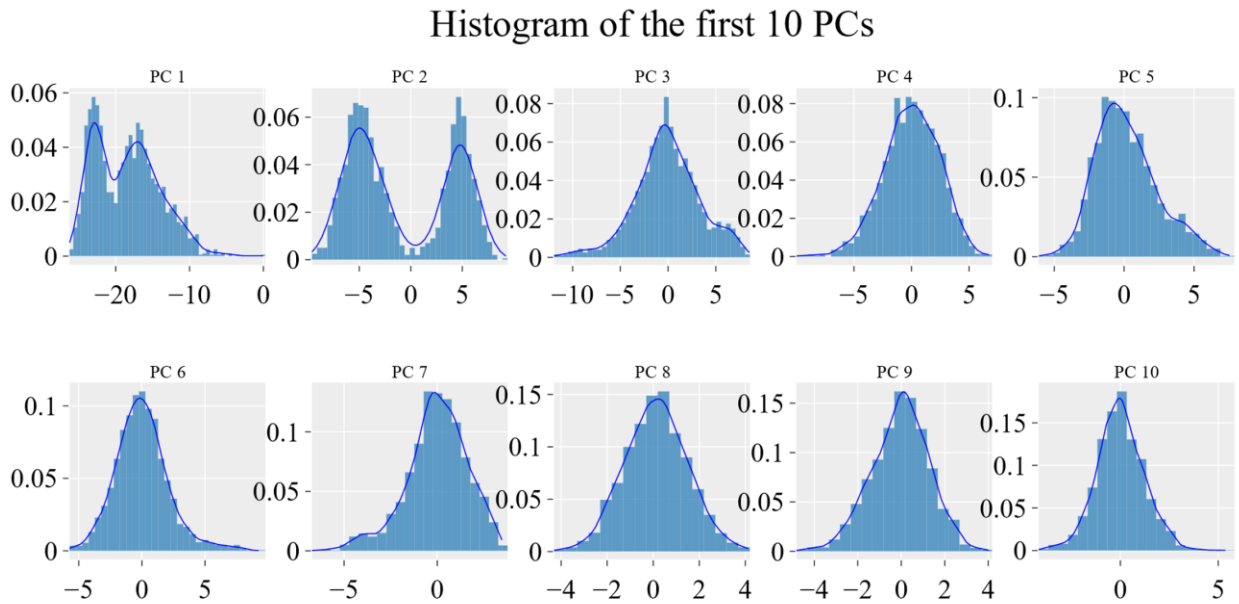

**Fig. S6.** The arrangement of the initial ten eigenvectors

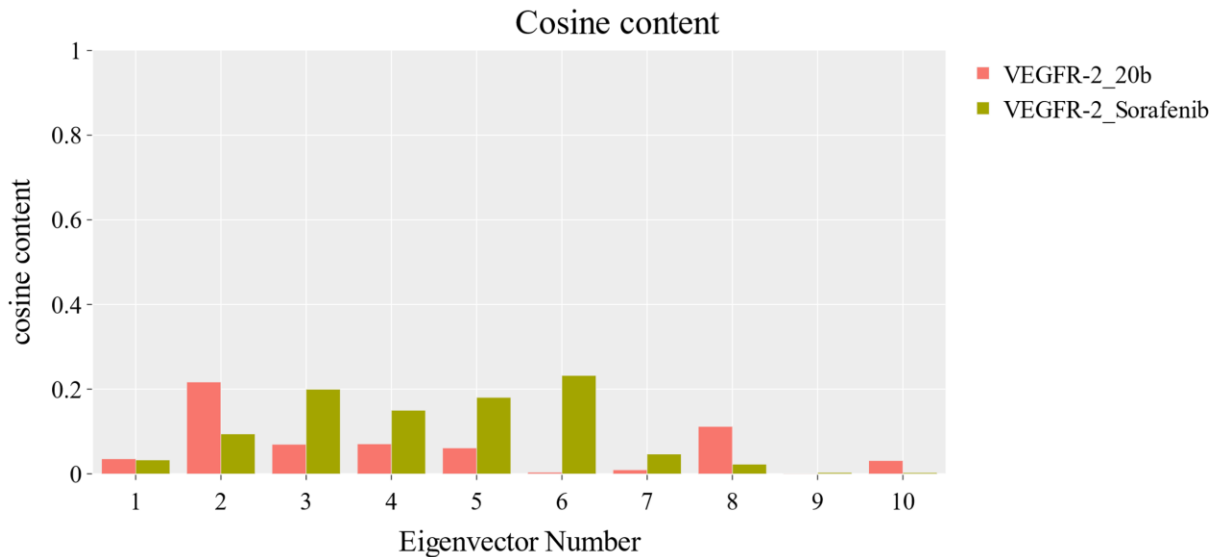

**Fig. S7.** Cosine content's Values of the first ten eigenvectors.

The results obtained from projecting each trajectory onto the first three eigenvectors of the new C matrix are presented in **Fig. S8-S10**. In these graphs, the larger dot represents the average structure of the respective trajectory. **Fig. S8** illustrates the projection onto the first two eigenvectors, revealing distinct average structures for each trajectory. Moreover, the frames demonstrate separate sampling, with only a small amount of overlap observed at the initial stages of the simulation (pale red and white dots). Furthermore, the sampling patterns for the reference trajectory exhibit clustered frames indicating similarity within the sampled frames. Conversely, VEGFR-2\_20b shows two clusters indicating two sampled regions (orange dots and dark red dots). Similarly, **Fig. S9** displays a similar pattern to **Fig. S8**, with different average structures and distinct clustered sampling. Finally, **Fig. S10** illustrates the projection onto the second and third eigenvectors, indicating that the two trajectories differ from each other and exhibit only slight overlap in the early frames. Notably, in the VEGFR-2\_20b complex frames, two clusters are observed (similar to PC1/PC2 projection), with one cluster (orange dots) being in proximity to the region of VEGFR-2\_sorafenib, while the other cluster is located further away. This suggests the sampling of a new region after spending some time near the initial structure. In the visualization, small white-to-black dots represent frames from the VEGFR-2 in the VEGFR-2\_sorafenib simulation, while small white-to-red dots represent frames from the VEGFR-2 in the VEGFR-2\_20b simulation.

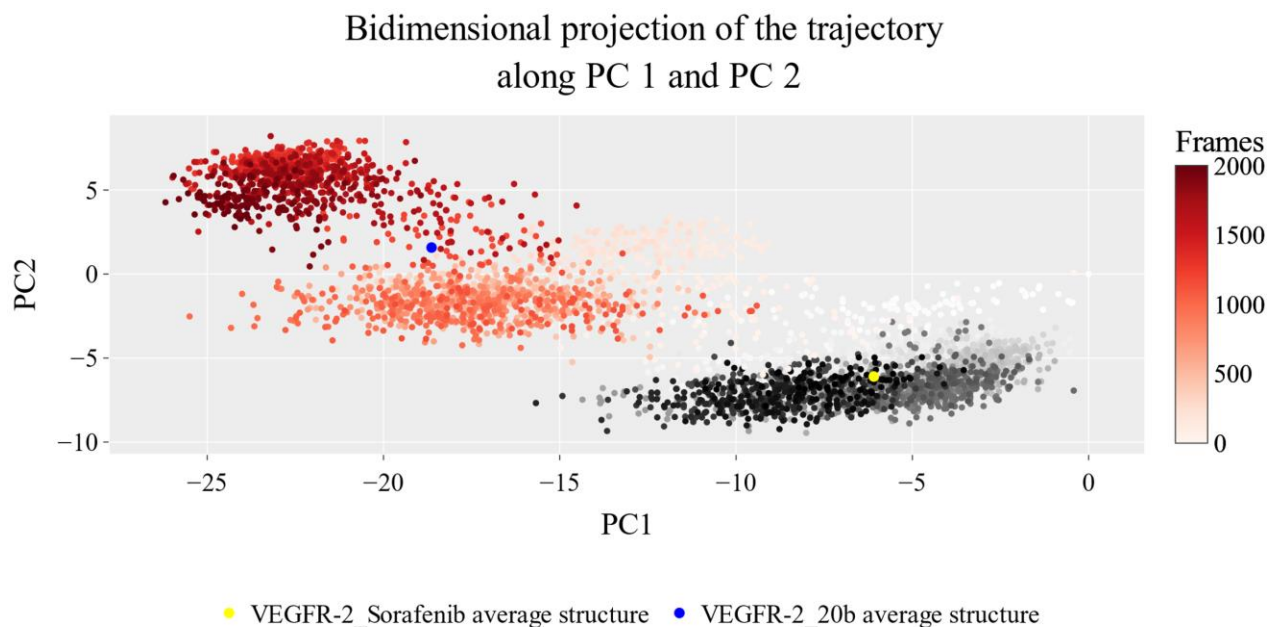

**Fig. S8.** Each trajectory is projected onto the first two eigenvectors.

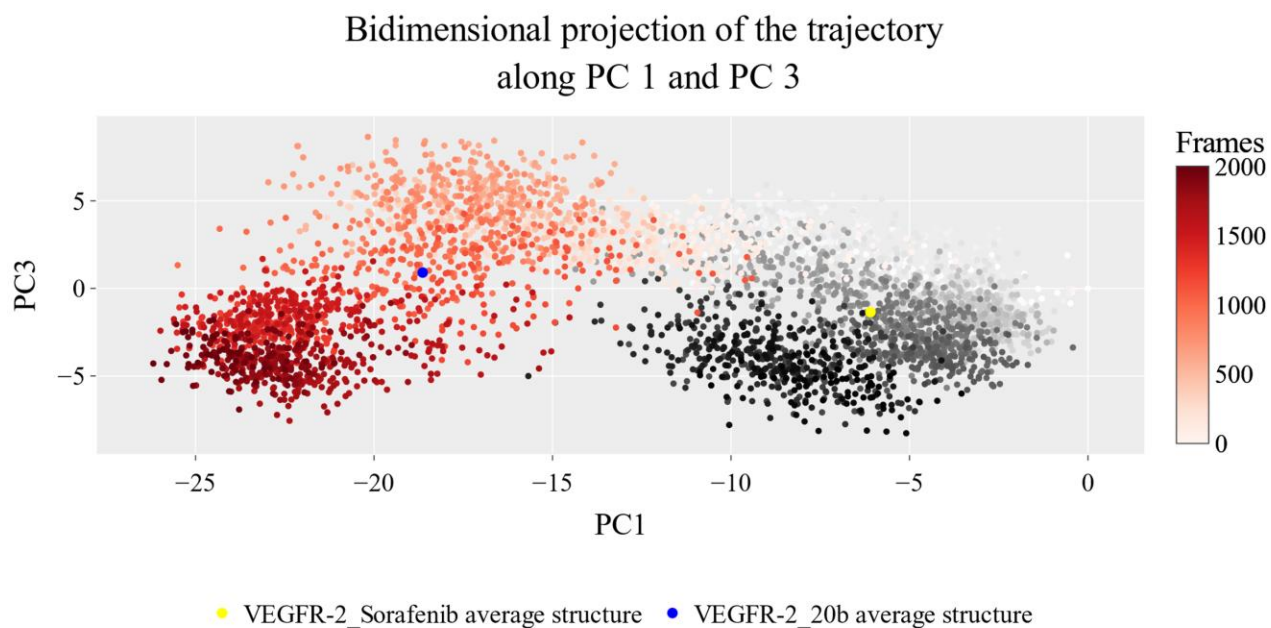

**Fig. S9.** Each trajectory is projected onto the first and third eigenvectors.

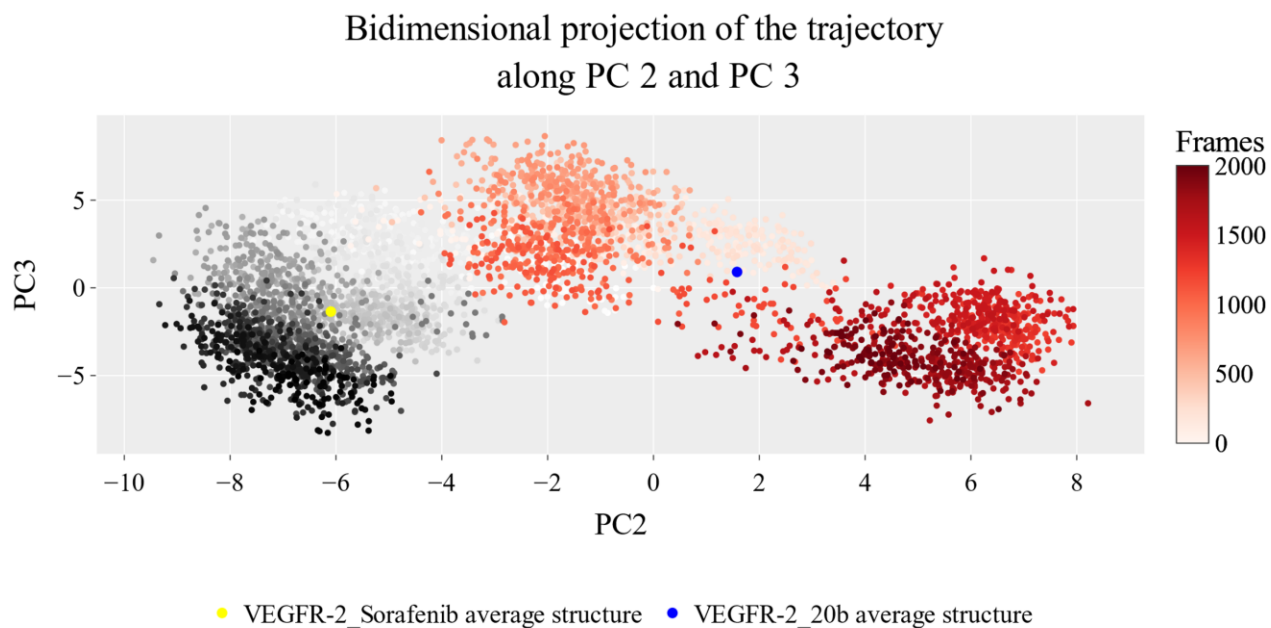

**Fig. S10.** Each trajectory is projected onto the second and third eigenvectors.

### S.3.4. Density Function Theory (DFT) calculations

The calculations have been done using DFT/B3LYP/6-31+G (d, p) theory level utilizing Gaussian 09 software with the aid of various software including GaussSum, Multiwfn, AIMALL and Gauss View 5. Mulliken charge analysis as well as TDOS; Total density of states, MEP; molecular electrostatic potential, QTAIM; quantum theory of atoms in molecules, analyses have performed. FMO; frontiers molecular orbital analysis and reactivity descriptors including global softness( $\sigma$ ), global hardness( $\eta$ ), chemical potential( $\mu$ ), electron affinity (EA), electronegativity ( $\chi$ ), electrophilicity index( $\omega$ ), ionization potential (IP), and energy change ( $\Delta E$ ) have been determined according to the following equations:

$$IP = -E_{\text{HOMO}}$$

$$EA = -E_{\text{LUMO}}$$

$$\mu = (IP + EA)/2$$

$$\eta = (IP - EA)$$

$$\chi = -\mu$$

$$\omega = \mu^2 / (2 \eta)$$

$$\sigma = 1 / \eta$$

$$\Delta N = -(\mu / \eta)$$

$$\Delta E = -\omega$$

$$E_{\text{gap}} = E_{\text{LUMO}} - E_{\text{HOMO}}$$

The HOMO and LUMO (frontier molecular orbitals) are electronic characteristics that are linked to chemical reactivity. Their energies have been determined to be -5.684 and -2.476 eV, respectively. This results in values of the ionization potential (IP), electron affinity (EA), chemical potential ( $\mu$ ), hardness ( $\eta$ ), and electrophilicity ( $\omega$ ). The wave function distribution of the HOMO and LUMO is found over the conjugated  $\pi$ -system, suggesting a  $\pi$ - $\pi$  intramolecular charge transfer due to the lowest energy gap ( $E_{\text{gap}}$ ) of 3.207 eV, **Fig. S11.A**. Such a result indicates easier excitations of electrons from HOMO to LUMO which imply potential chemical reactivity [49]. The electron density map over electrostatic potential in **Fig. S11.A** shows that the structure is composed of several charged (negative and positive) areas. The oxygen atoms in the carbonyl groups belong to the negatively charged areas. In contrast, the carbonyl carbon and hydrogen atoms are the most positively charged atomic sites.



To gain deep insights into the electronic structure and then the chemical behavior of **20b**, the total density of states (TDOs) has been analyzed and demonstrated in **Fig. S11.B**. The highest peak of electronic density (in yellow color) defines the orbitals that are involved in bonding with the target. The narrow HOMO-LUMO gap in energy suggests easier excitation of electrons and possibly increased reactivity [50]. The topology analysis of the electron density ( $\rho$ ) in the quantum theory of atoms in molecule (QTAIM) has been performed based on the obtained  $\rho$  from the DFT method. QTAIM gains a comprehensive insight into the electronic structure, bonding nature and reactivity of a molecule. In QTAIM, bond critical points (BCP) and bond paths are identified based on the gradient of  $\rho$ . In addition, the Laplacian of electron density ( $\nabla^2\rho$ ), total electron energy density ( $H(r)$ ), kinetic electron energy density ( $G(r)$ ) and potential electron energy density ( $V(r)$ ) at each BCP are determined. **Fig. S11.C** demonstrated that three bonds are generated within **20b**.

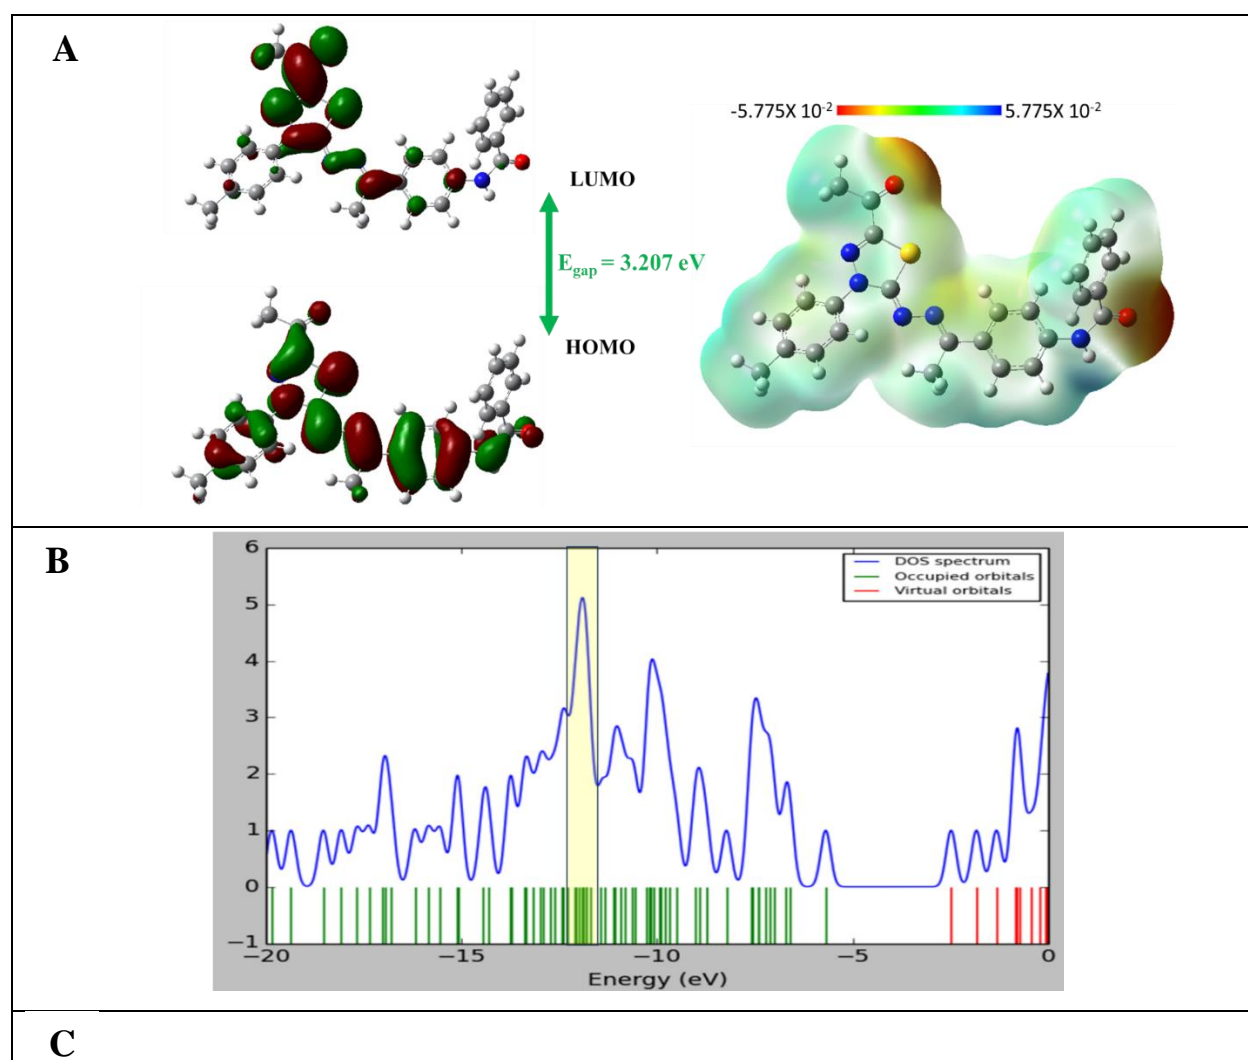

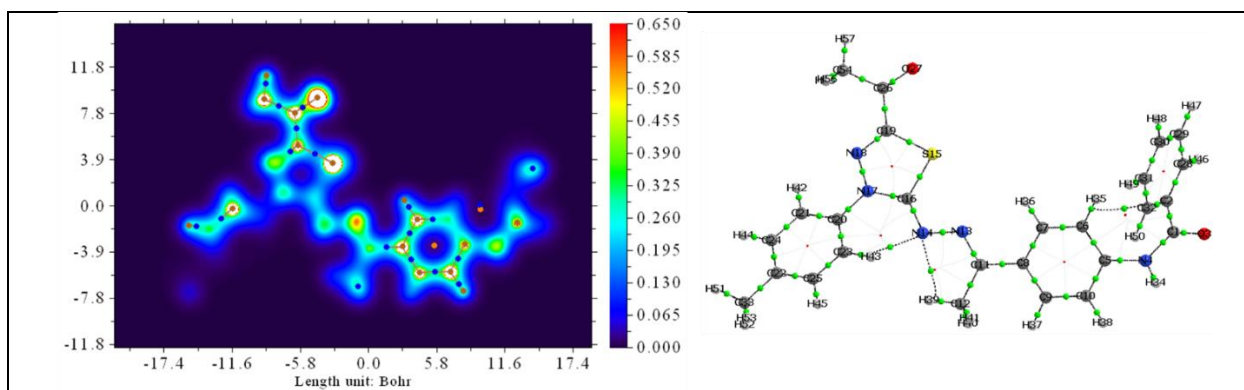

**Fig. S11.** The FMO and energy gap, the ESP (A), the TDOS spectrum (B), and the QTAIM maps (C) for compound **20b**. These results were obtained using B3LYP/6-31+G(d,p).

The results in **Table S1** show that all bonds within the molecule are covalent while the newly generated bonds are electrostatic in nature which provide the molecule with stability.

**Table S1.** The QTAIM parameters (a.u.) at bond critical points (BCPs) of **20b**.

| BCP #     | Atoms            | $\rho$          | $(\nabla^2\rho)$ | $K(r)$          | $G(r)$          | $V(r)$          | $H(r)$          |
|-----------|------------------|-----------------|------------------|-----------------|-----------------|-----------------|-----------------|
| 1         | C1 - C2          | 0.26569         | -0.66472         | 0.227058        | 0.060877        | -0.28794        | -0.22706        |
| 2         | C1 - O3          | 0.401135        | -0.07824         | 0.692595        | 0.673035        | -1.36563        | -0.6926         |
| 3         | C1 - N4          | 0.307836        | -0.98721         | 0.45509         | 0.208287        | -0.66338        | -0.45509        |
| 4         | C6 - C7          | 0.315624        | -0.86494         | 0.318946        | 0.102711        | -0.42166        | -0.31895        |
| 5         | C7 - C8          | 0.304828        | -0.81305         | 0.296259        | 0.092995        | -0.38925        | -0.29626        |
| 6         | C5 - C6          | 0.307943        | -0.83457         | 0.304689        | 0.096045        | -0.40073        | -0.30469        |
| 7         | N4 - H34         | 0.341404        | -1.81804         | 0.506558        | 0.052049        | -0.55861        | -0.50656        |
| 8         | N4 - C5          | 0.285186        | -0.86617         | 0.395392        | 0.178851        | -0.57424        | -0.39539        |
| 9         | C5 - C10         | 0.311734        | -0.85085         | 0.311043        | 0.09833         | -0.40937        | -0.31104        |
| 10        | C8 - C9          | 0.306803        | -0.81898         | 0.300277        | 0.095532        | -0.39581        | -0.30028        |
| 11        | C9 - C10         | 0.312384        | -0.85008         | 0.312289        | 0.099768        | -0.41206        | -0.31229        |
| 12        | C8 - C11         | 0.270685        | -0.67357         | 0.233728        | 0.065336        | -0.29906        | -0.23373        |
| 13        | C11 - N13        | 0.370388        | -0.80275         | 0.638647        | 0.43796         | -1.07661        | -0.63865        |
| 14        | C11 - C12        | 0.254597        | -0.60216         | 0.211093        | 0.060553        | -0.27165        | -0.21109        |
| <b>15</b> | <b>C12 - H39</b> | <b>0.283535</b> | <b>-1.01715</b>  | <b>0.296139</b> | <b>0.041853</b> | <b>-0.33799</b> | <b>-0.29614</b> |
| 16        | N13 - N14        | 0.342813        | -0.63817         | 0.331307        | 0.171764        | -0.50307        | -0.33131        |
| 17        | S15 - C16        | 0.195021        | -0.35677         | 0.148677        | 0.059485        | -0.20816        | -0.14868        |
| 18        | N14 - H39        | 0.016938        | 0.074658         | -0.00337        | 0.015297        | -0.01193        | 0.003368        |

|    |           |          |          |          |          |          |          |
|----|-----------|----------|----------|----------|----------|----------|----------|
| 19 | N14 - C16 | 0.386609 | -1.19354 | 0.664567 | 0.366183 | -1.03075 | -0.66457 |
| 20 | N17 - C20 | 0.271242 | -0.72997 | 0.383585 | 0.201093 | -0.58468 | -0.38359 |
| 21 | C16 - N17 | 0.301339 | -0.93736 | 0.429118 | 0.194778 | -0.6239  | -0.42912 |
| 22 | N18 - C19 | 0.3669   | -0.65461 | 0.629766 | 0.466114 | -1.09588 | -0.62977 |
| 23 | N17 - N18 | 0.364394 | -0.69898 | 0.36572  | 0.190976 | -0.5567  | -0.36572 |
| 24 | S15 - C19 | 0.199683 | -0.37223 | 0.155012 | 0.061955 | -0.21697 | -0.15501 |
| 25 | C20 - C21 | 0.311154 | -0.84774 | 0.311198 | 0.099263 | -0.41046 | -0.3112  |
| 26 | C21 - C24 | 0.312567 | -0.85216 | 0.31302  | 0.09998  | -0.413   | -0.31302 |
| 27 | C20 - C23 | 0.311644 | -0.85191 | 0.312724 | 0.099745 | -0.41247 | -0.31272 |
| 28 | C22 - C24 | 0.309513 | -0.83387 | 0.305656 | 0.097188 | -0.40284 | -0.30566 |
| 29 | N14 - H43 | 0.012326 | 0.04491  | -0.0019  | 0.009333 | -0.00744 | 0.001895 |
| 30 | C22 - C25 | 0.310062 | -0.83617 | 0.306702 | 0.09766  | -0.40436 | -0.3067  |
| 31 | C24 - H44 | 0.283933 | -1.01628 | 0.295652 | 0.041583 | -0.33723 | -0.29565 |
| 32 | C23 - C25 | 0.311698 | -0.84757 | 0.311184 | 0.099292 | -0.41048 | -0.31119 |
| 33 | C19 - C26 | 0.272612 | -0.69319 | 0.238605 | 0.065306 | -0.30391 | -0.23861 |
| 34 | C26 - C54 | 0.257637 | -0.62639 | 0.21709  | 0.060491 | -0.27758 | -0.21709 |
| 35 | C26 - O27 | 0.401319 | 0.128282 | 0.68371  | 0.715781 | -1.39949 | -0.68371 |
| 36 | C2 - H35  | 0.007972 | 0.028906 | -0.00161 | 0.00562  | -0.00401 | 0.001607 |
| 37 | C2 - C28  | 0.308749 | -0.8308  | 0.30444  | 0.096741 | -0.40118 | -0.30444 |
| 38 | C28 - C29 | 0.313249 | -0.85851 | 0.313653 | 0.099027 | -0.41268 | -0.31365 |
| 39 | C29 - C30 | 0.31134  | -0.85021 | 0.309849 | 0.097297 | -0.40715 | -0.30985 |
| 40 | C2 - C32  | 0.307424 | -0.81996 | 0.302336 | 0.097347 | -0.39968 | -0.30234 |
| 41 | C30 - C31 | 0.311637 | -0.85137 | 0.310415 | 0.097572 | -0.40799 | -0.31041 |
| 42 | C31 - C32 | 0.312385 | -0.85297 | 0.312165 | 0.098923 | -0.41109 | -0.31217 |
| 43 | C22 - C33 | 0.253314 | -0.60043 | 0.20794  | 0.057832 | -0.26577 | -0.20794 |
| 44 | C33 - H53 | 0.276822 | -0.94922 | 0.282194 | 0.04489  | -0.32709 | -0.2822  |
| 45 | C6 - H35  | 0.286709 | -1.04296 | 0.301562 | 0.040822 | -0.34238 | -0.30156 |
| 46 | C7 - H36  | 0.2893   | -1.07597 | 0.307201 | 0.038209 | -0.34541 | -0.3072  |
| 47 | C10 - H38 | 0.283245 | -1.00992 | 0.294717 | 0.042236 | -0.33695 | -0.29472 |
| 48 | C9 - H37  | 0.286509 | -1.035   | 0.300682 | 0.041932 | -0.34261 | -0.30068 |
| 49 | C12 - H40 | 0.274437 | -0.93097 | 0.278644 | 0.045903 | -0.32455 | -0.27864 |
| 50 | C12 - H41 | 0.27294  | -0.91933 | 0.276075 | 0.046242 | -0.32232 | -0.27608 |
| 51 | C21 - H42 | 0.287081 | -1.05044 | 0.302678 | 0.040069 | -0.34275 | -0.30268 |
| 52 | C23 - H43 | 0.289631 | -1.07738 | 0.308385 | 0.039041 | -0.34743 | -0.30838 |
| 53 | C25 - H45 | 0.283987 | -1.01647 | 0.295735 | 0.041618 | -0.33735 | -0.29574 |
| 54 | C28 - H46 | 0.287509 | -1.05879 | 0.303235 | 0.038539 | -0.34177 | -0.30324 |
| 55 | C29 - H47 | 0.285076 | -1.02896 | 0.297915 | 0.040675 | -0.33859 | -0.29792 |
| 56 | C30 - H48 | 0.285212 | -1.03066 | 0.298092 | 0.040427 | -0.33852 | -0.29809 |
| 57 | C31 - H49 | 0.284988 | -1.02766 | 0.297775 | 0.040859 | -0.33863 | -0.29777 |
| 58 | C32 - H50 | 0.286819 | -1.04349 | 0.301365 | 0.040493 | -0.34186 | -0.30137 |
| 59 | C33 - H51 | 0.276638 | -0.94792 | 0.281896 | 0.044915 | -0.32681 | -0.2819  |
| 60 | C33 - H52 | 0.273723 | -0.92686 | 0.276852 | 0.045137 | -0.32199 | -0.27685 |
| 61 | C54 - H55 | 0.273911 | -0.93559 | 0.278519 | 0.044621 | -0.32314 | -0.27852 |

---

|    |           |          |         |          |          |          |          |
|----|-----------|----------|---------|----------|----------|----------|----------|
| 62 | C54 - H57 | 0.280521 | -0.9905 | 0.289696 | 0.04207  | -0.33177 | -0.2897  |
| 63 | C54 - H56 | 0.276034 | -0.9537 | 0.282217 | 0.043792 | -0.32601 | -0.28222 |

---

### S.3.5. ADMET studies

ADMET descriptors (absorption, distribution, metabolism, excretion and toxicity) of the compounds were determined using Discovery studio 4.0. Sorafenib was used as a reference molecule. At first, the CHARMM force field was applied then the tested compounds were prepared and minimized according to the preparation of small molecule protocol.

- **Preparation of the tested compounds:**

In this protocol, the general-purpose panel was utilized with the activation of the Prepare ligand option. The change ionization was switched on the true option using the Rule based as an ionization method. In Rule based task, we used the carboxylate as an acid ionization. Additionally, the primary, secondary, and tertiary amines were selected as Base ionization. The ionization enumeration option was switched on the one protomer. Under the filter smart option, we selected all options. The false option was selected for tasks Generate tautomers, generate isomers, Fix bad valencies, and parallel processing. The generate coordinates task was switched on the 3D option. Finally, the duplicate structure task was activated on the remove option.

- **Running of ADMET protocol**

In this protocol, the small molecules panel was utilized with the activation of the ADMET descriptors option. Then, we selected the prepared compounds as the input ligands. Further, all the ADMET parameters (aqueous solubility, Blood brain barrier, intestinal absorption, CYP2D6, and plasma protein binding) were selected. Then, the output of the running protocol was visualized to give the ADMET chart.

### S.3.6 Toxicity studies

The toxicity parameters of the synthesized compounds were calculated using Discovery studio 4.0. Sorafenib was used as a reference molecule. At first, the CHARMM force field was applied then the compounds were prepared and minimized according to the preparation of small molecule protocol.

- **Preparation of the tested compounds:**

In this protocol, the general-purpose panel was utilized with the activation of the Prepare ligand option. The change ionization was switched on the true option using the Rule based as an ionization method. In Rule based task, we used the carboxylate as an acid ionization. Additionally, the primary, secondary, and tertiary amines were selected as Base ionization. The ionization enumeration option was switched on the one protomer. Under the filter smart option, we selected all options. The false option was selected for tasks Generate tautomers, generate isomers, Fix bad valencies, and parallel processing. The generate coordinates task was switched on the 3D option. Finally, the duplicate structure task was activated on the remove option.

- **Running of Toxicity protocol**

In this protocol, the small molecules panel was utilized with the activation of the toxicity prediction (extensible) option. Then, we selected the prepared compounds as the input ligands. Further, the different toxicity models were selected from the model panel. The similarity search task was activated to be true. The detailed report task was switched on as a PDF file. Then, the output of the running protocol was visualized to give the toxicity PDF report.

# IR of compound 16

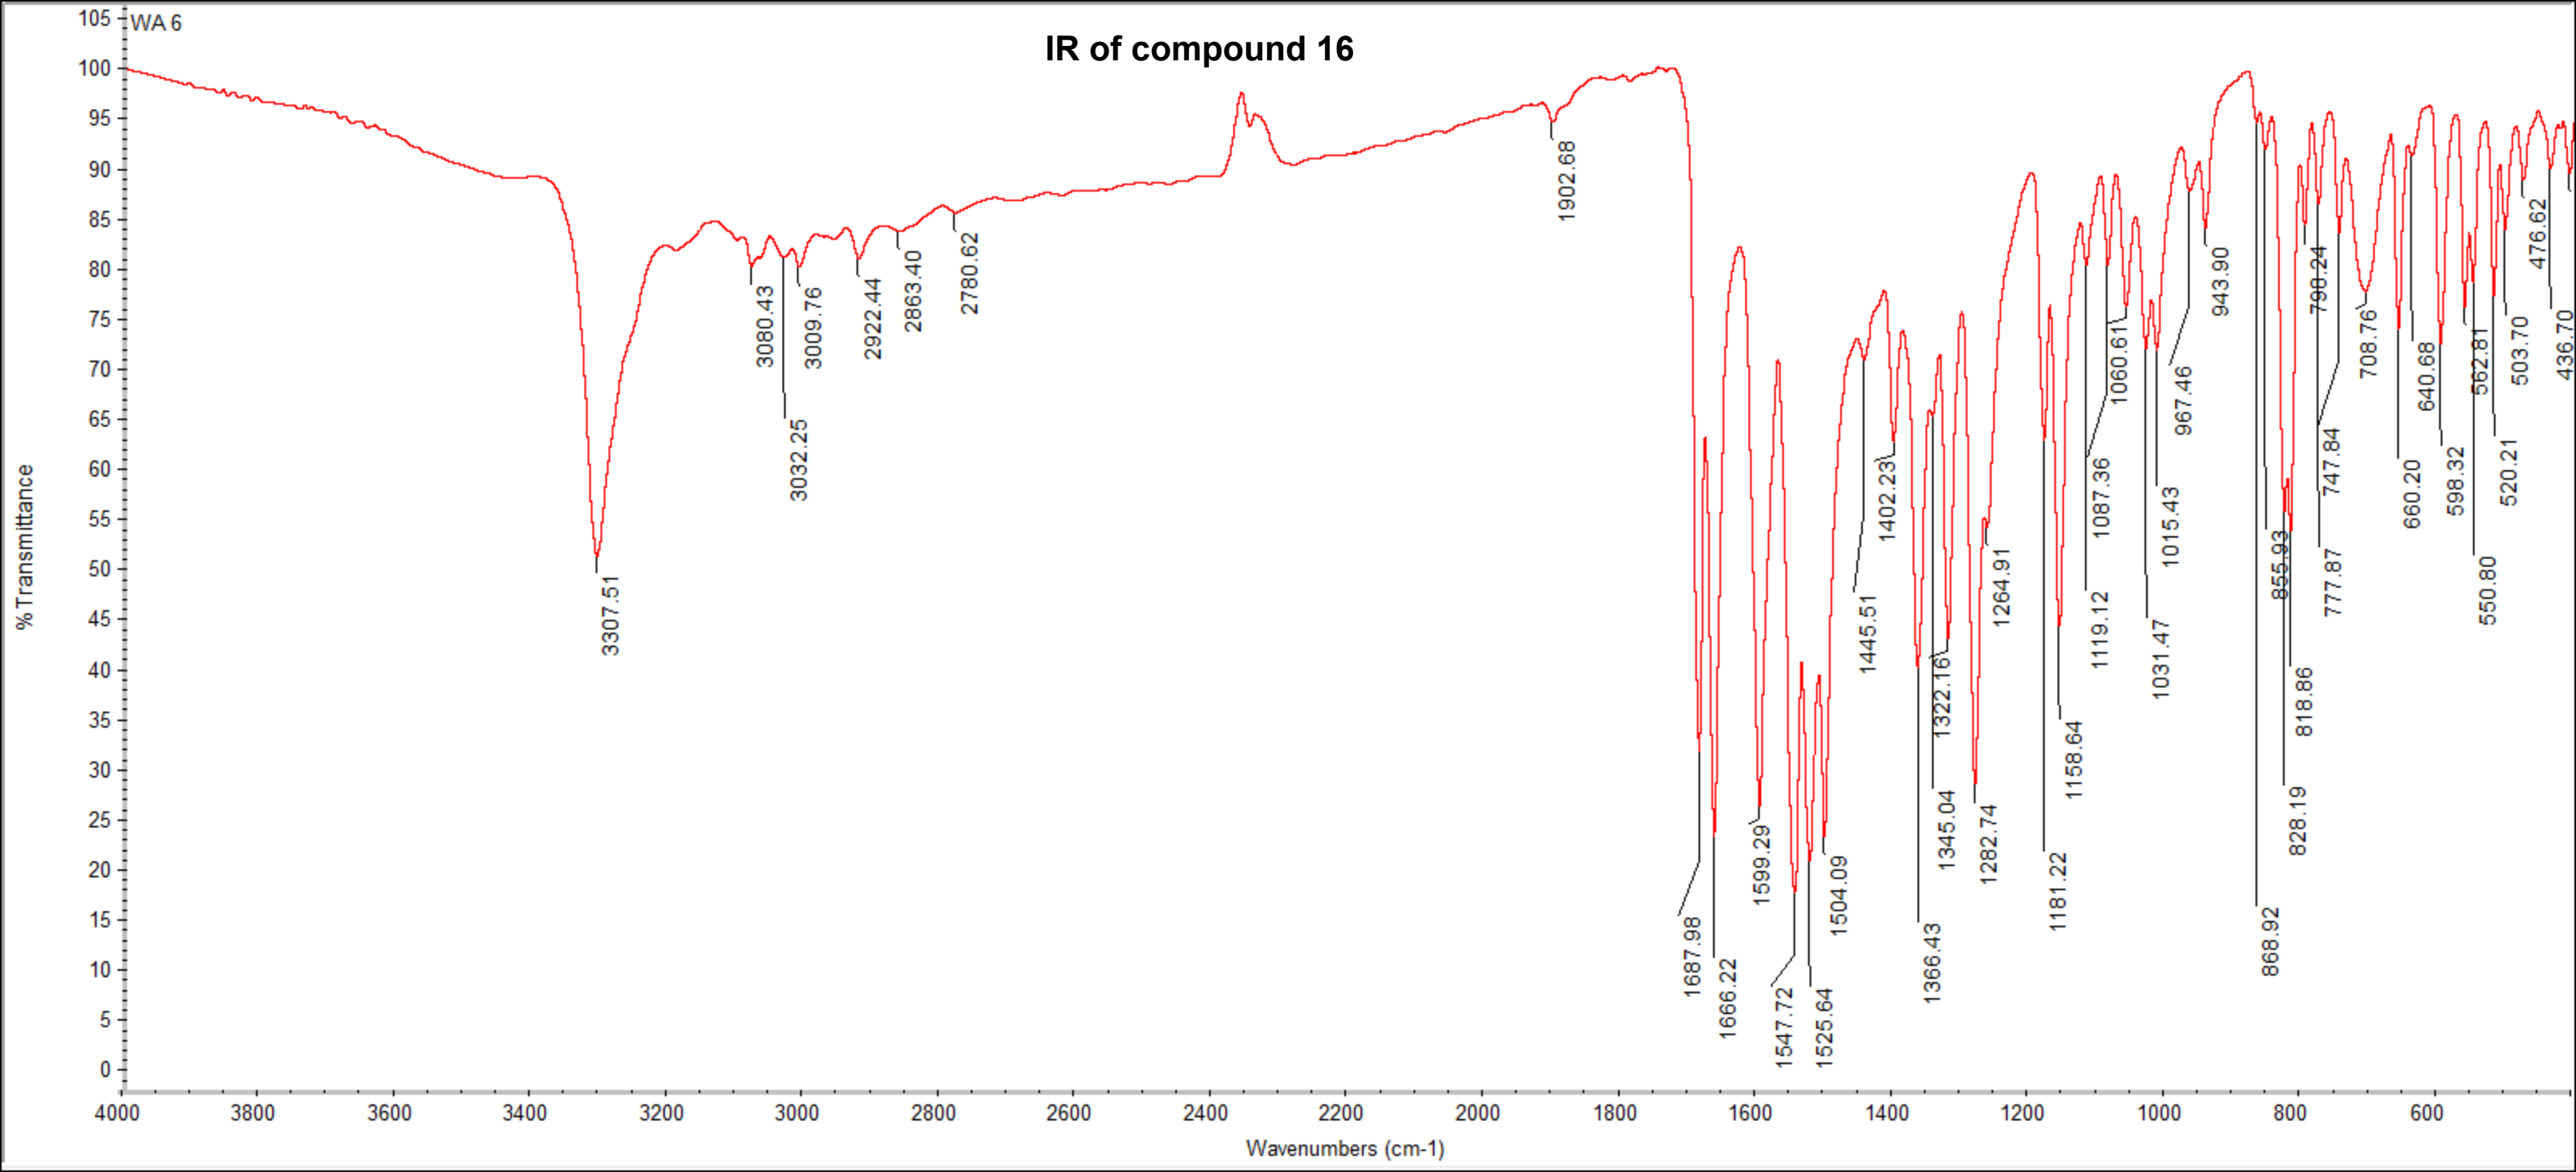

1H NMR of 16

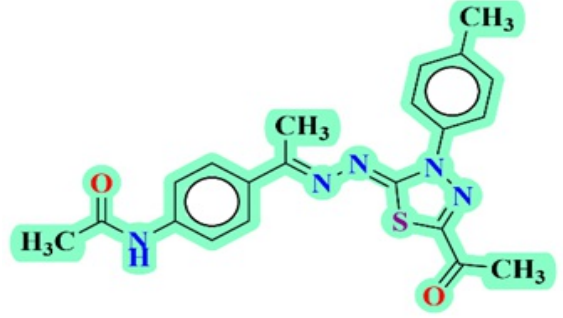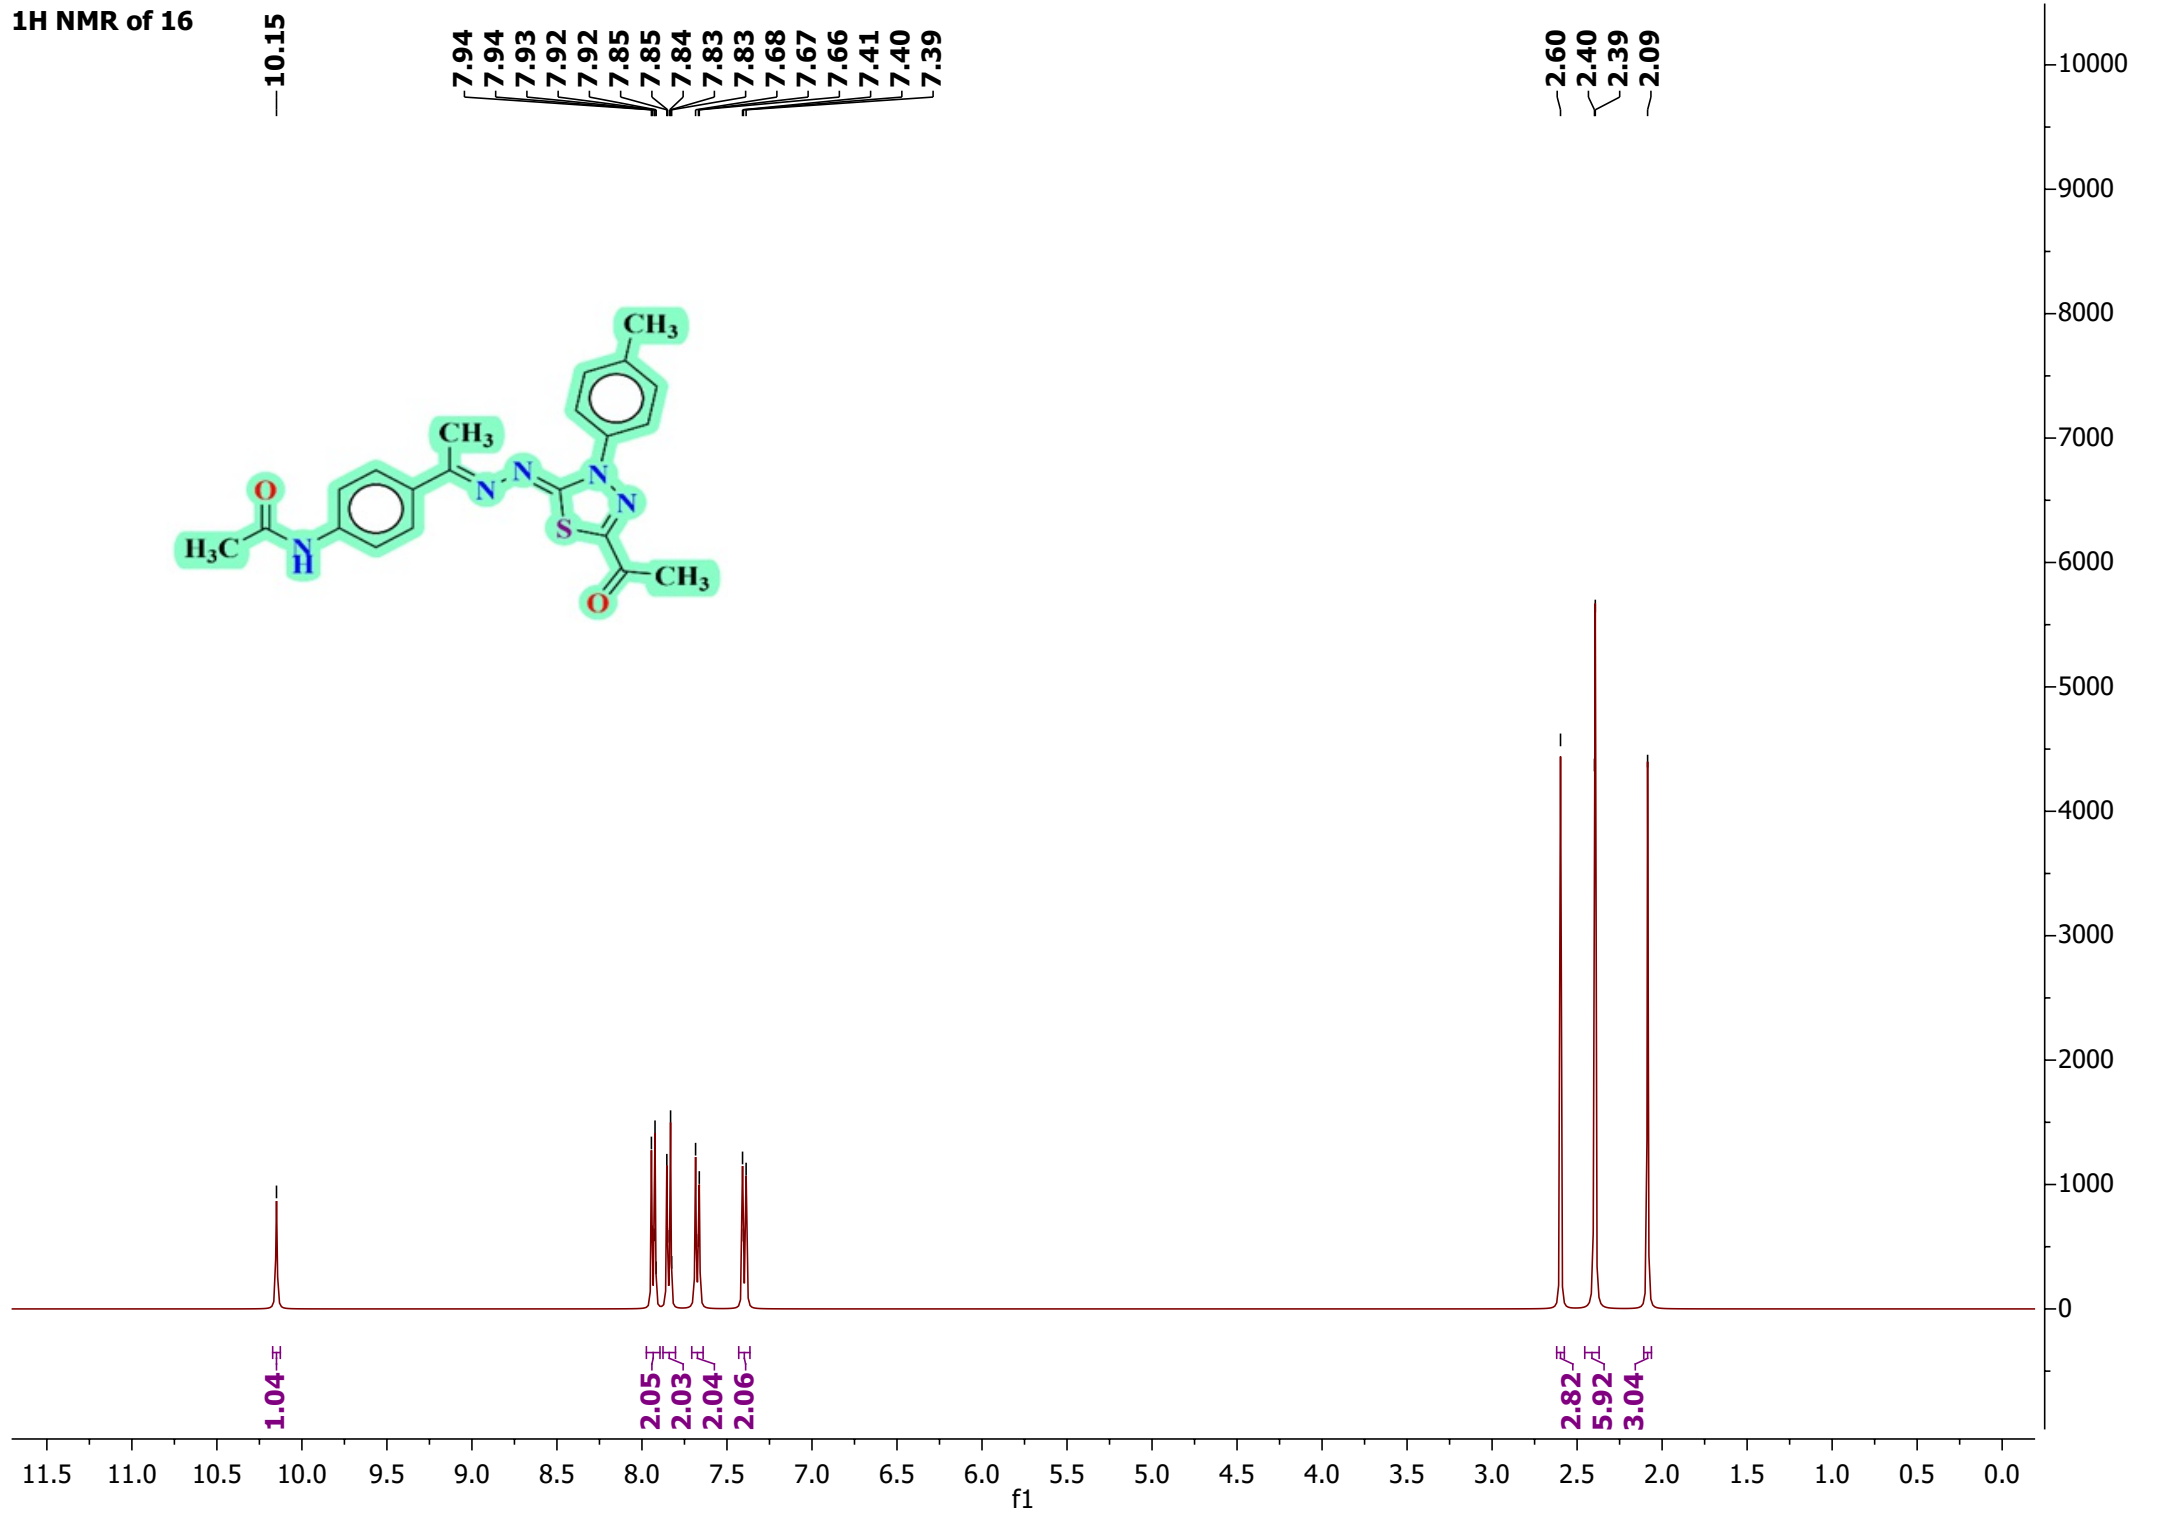

**<sup>13</sup>C NMR of 16**

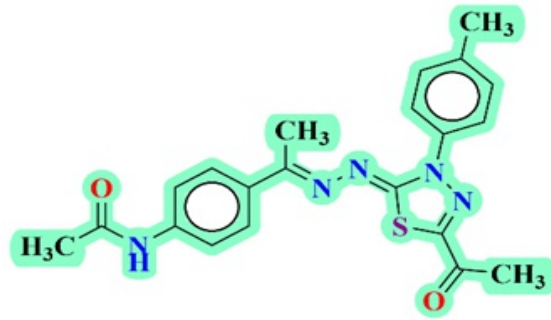

— 190.21

— 169.01  
— 164.55  
— 160.26

— 150.83

— 141.38  
— 137.24  
— 136.89  
— 132.22  
— 130.00  
— 127.57  
— 122.53  
— 119.02

40.63 DMSO  
40.42 DMSO  
40.21 DMSO  
40.00 DMSO  
39.80 DMSO  
39.59 DMSO  
39.38 DMSO  
25.50  
24.57  
21.10  
15.63

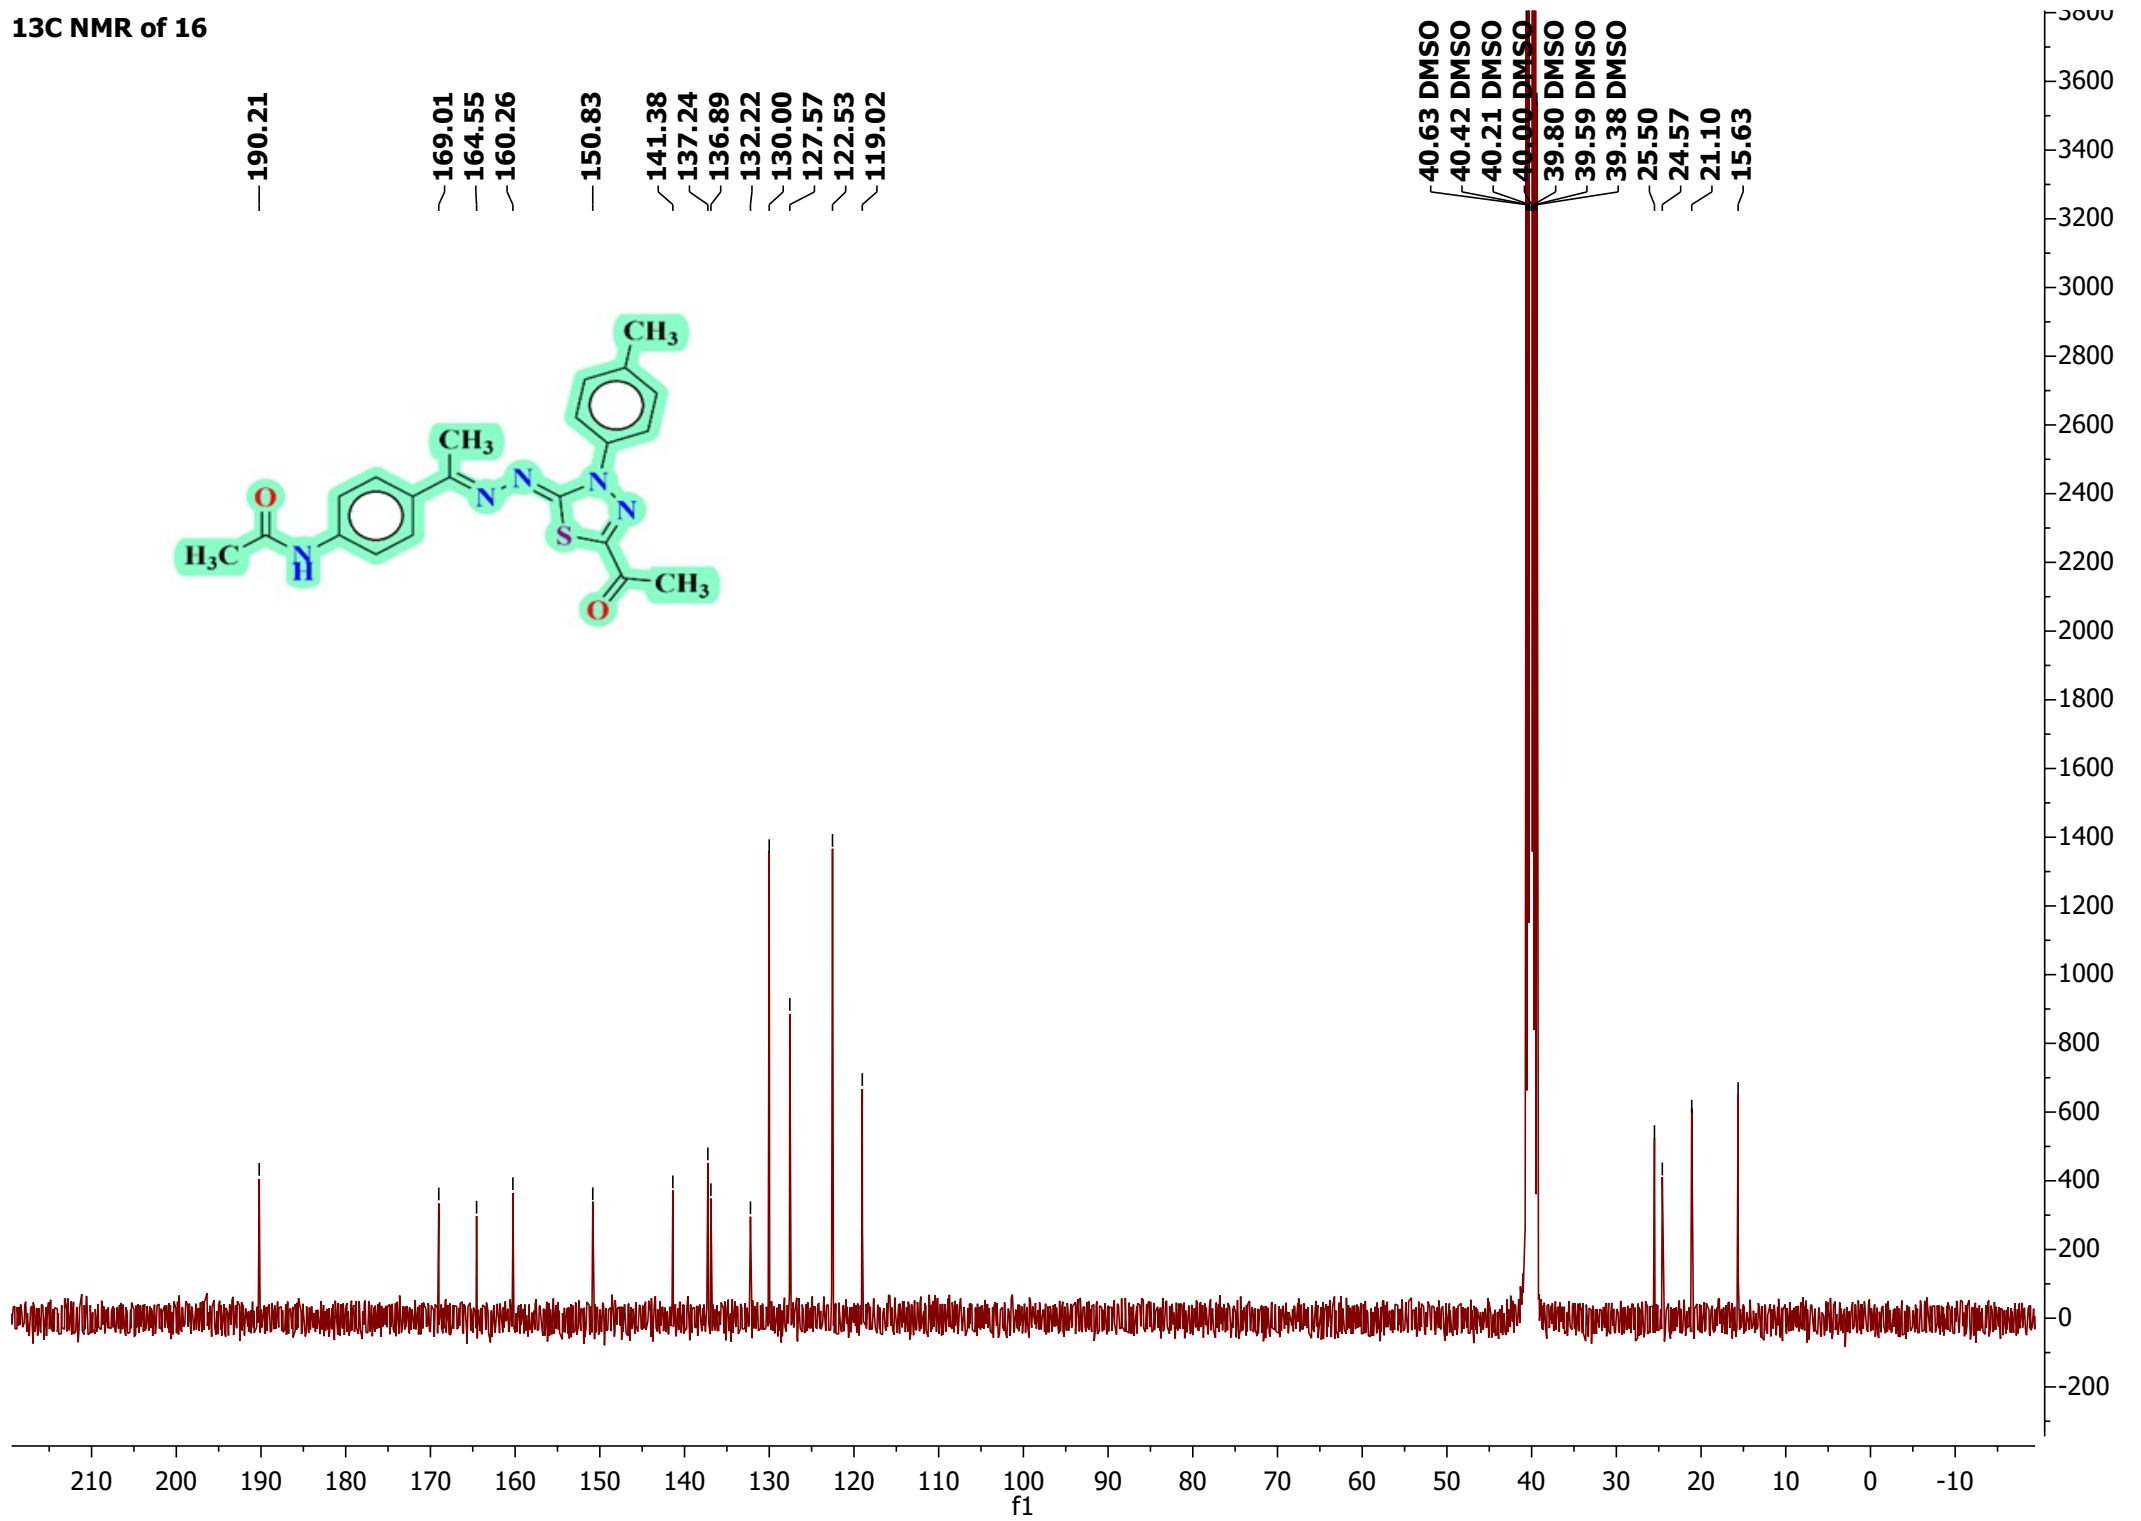



## Mass spec. of compound 16

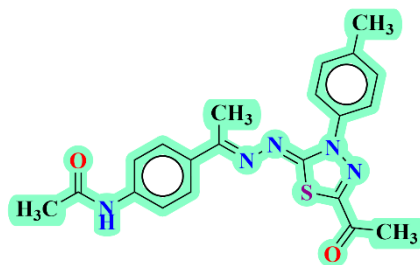

ibrahim-hassan-wa6 #190-195 RT: 3.20-3.28 AV: 6 SB: 26 1.21-1.34 , 0.87-1.14 NL: 8.99E1  
T: {0,0} + c EI Full ms [40.00-1000.00]

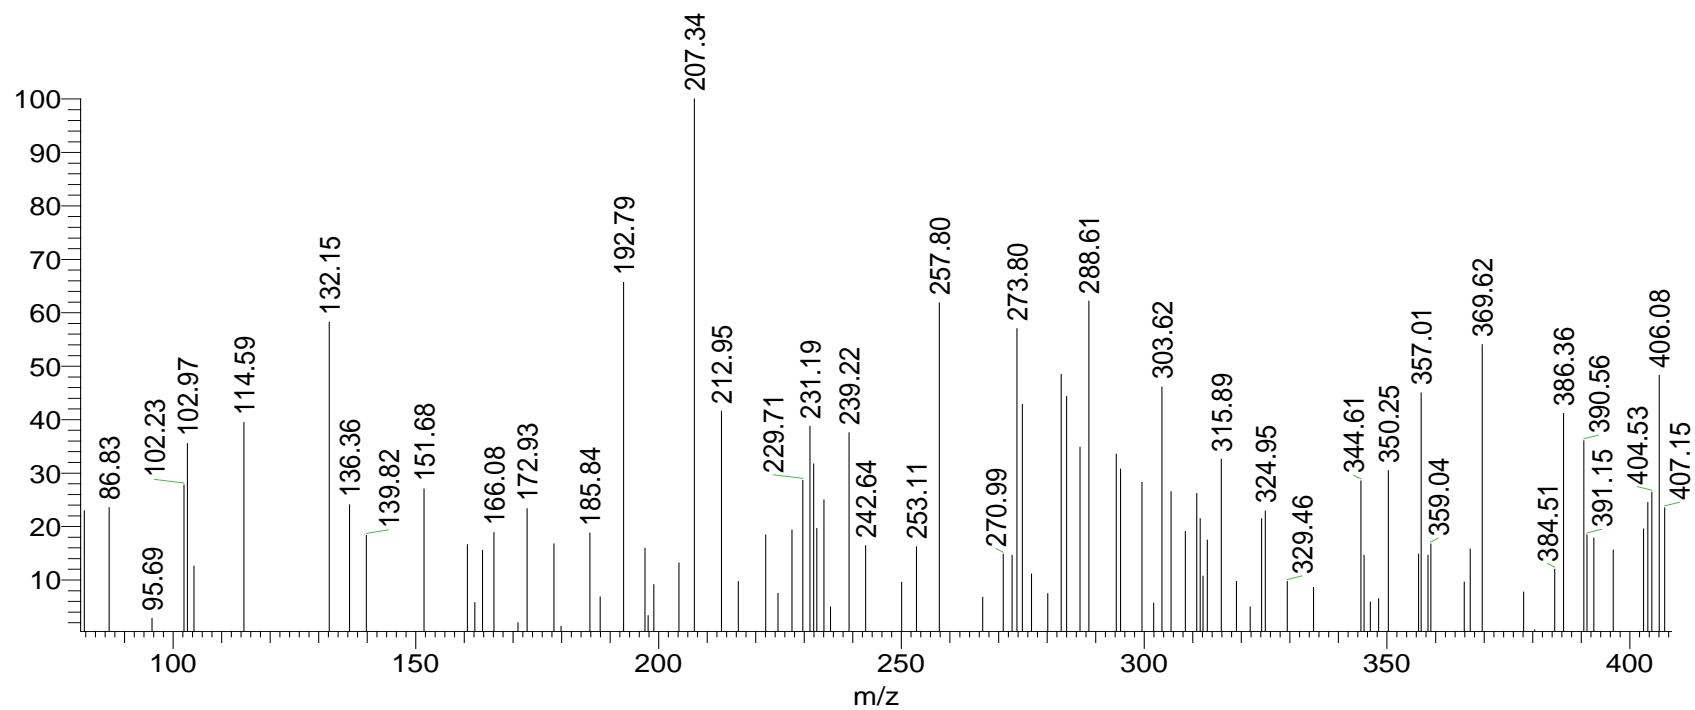

# IR of compound 20a

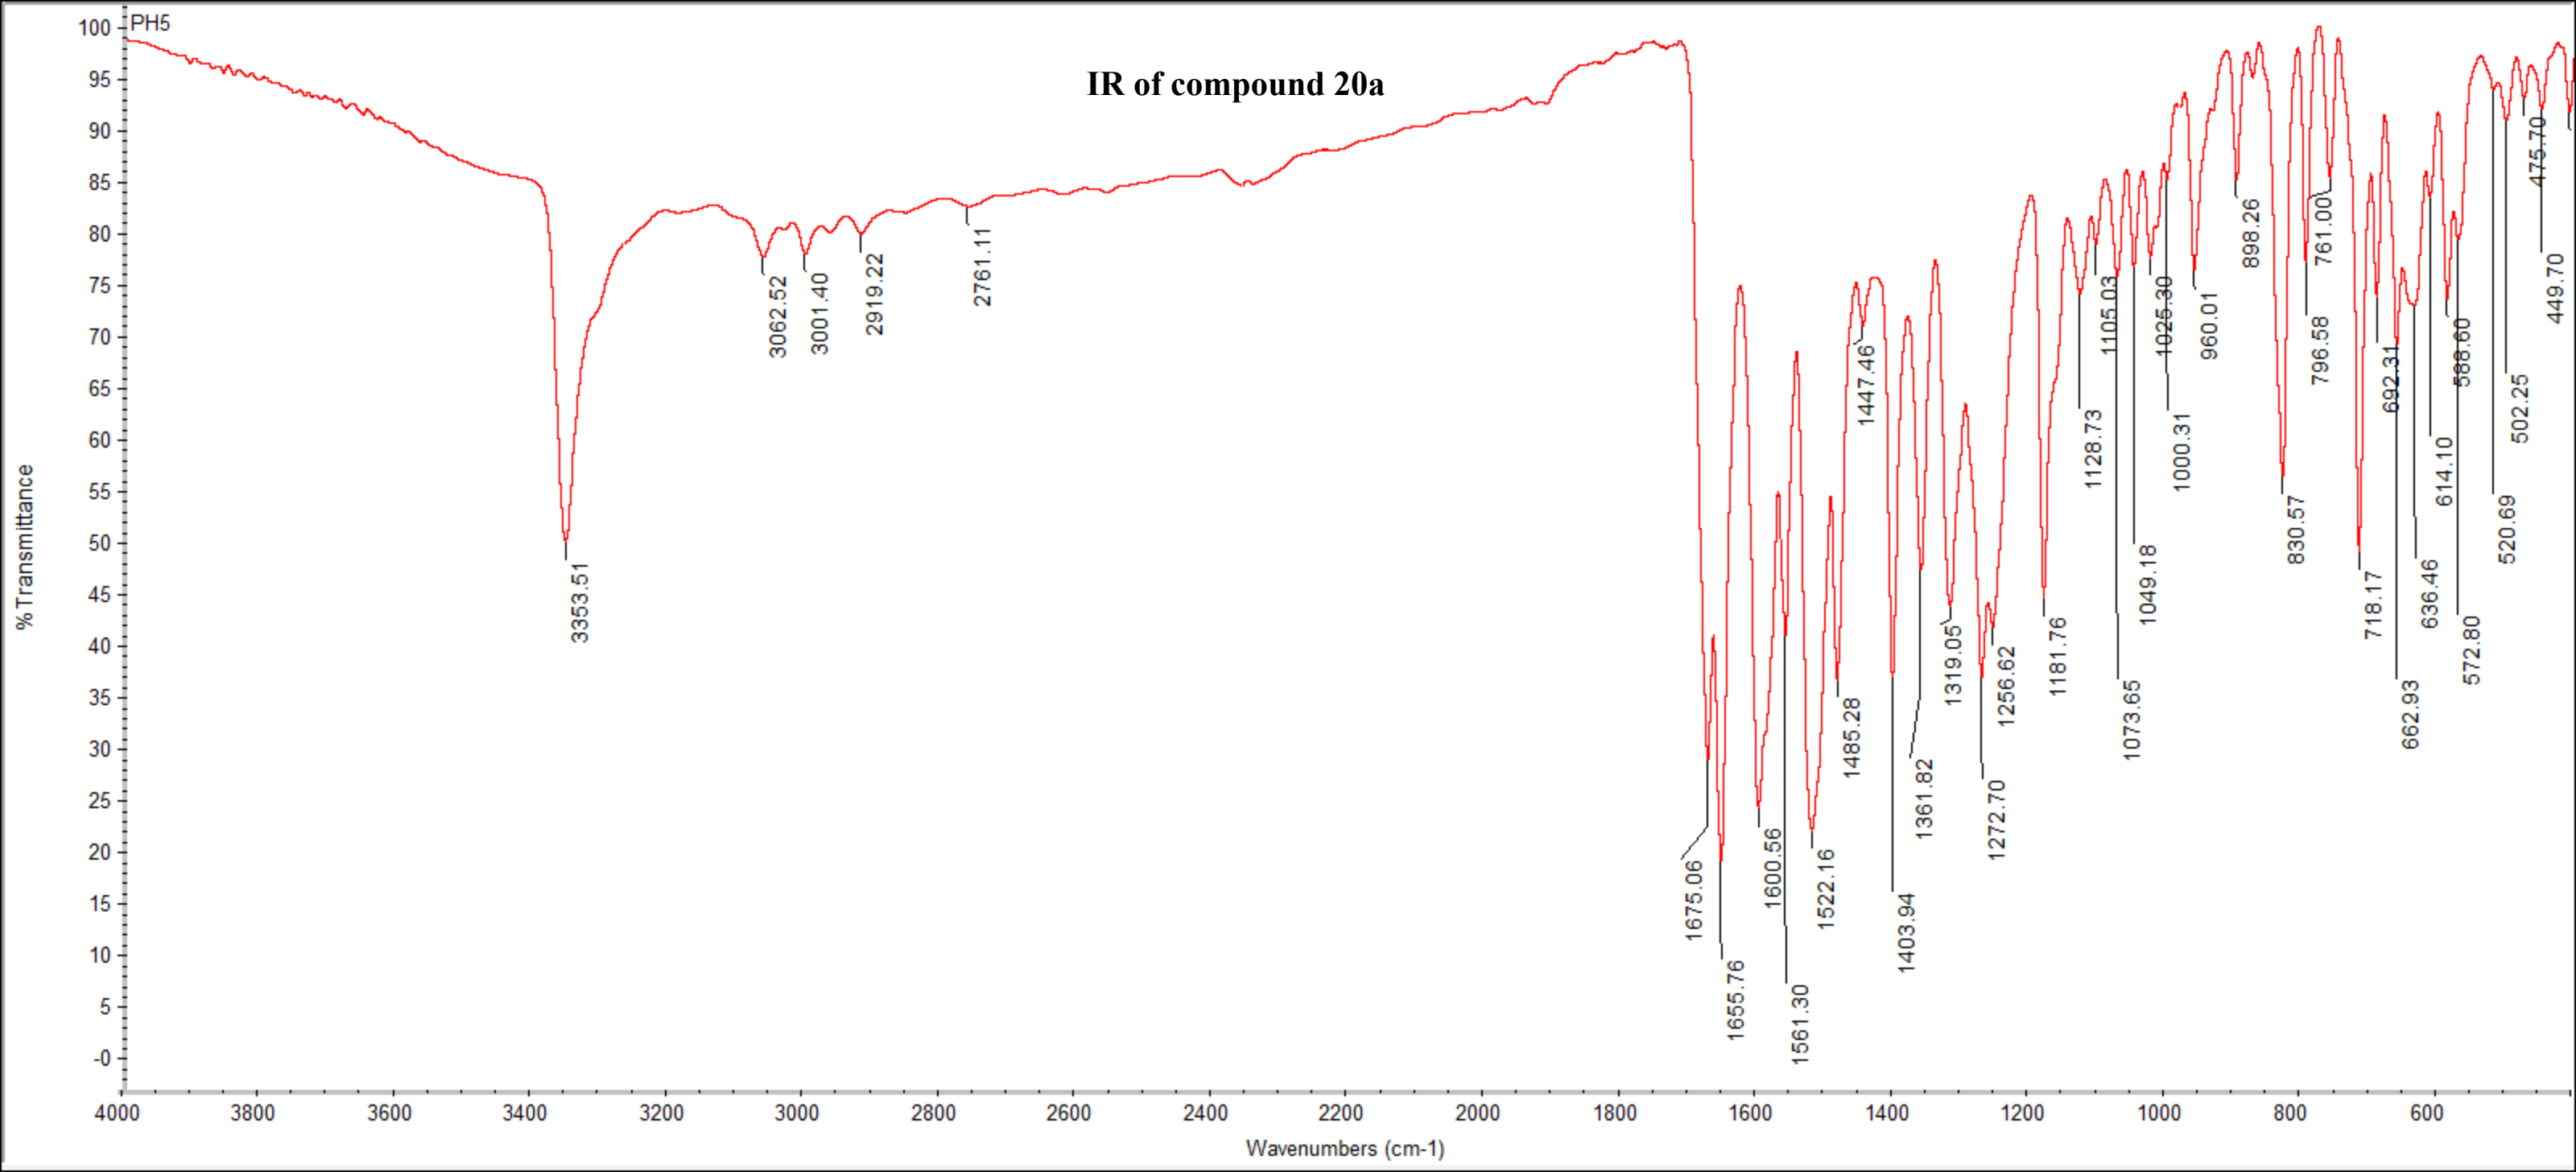

1H NMR of 20a

10.45  
8.01  
7.99  
7.99  
7.98  
7.91  
7.89  
7.88  
7.67  
7.67  
7.65  
7.65  
7.64  
7.63  
7.62  
7.62  
7.61  
7.61  
7.59  
7.58  
7.57  
7.56  
7.55  
7.54  
7.54

2.54  
2.23

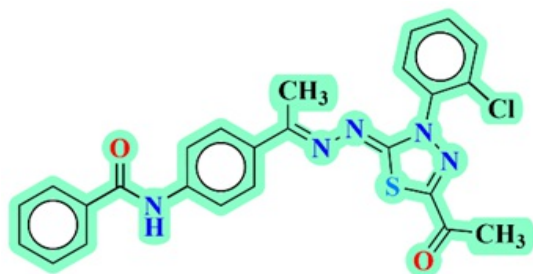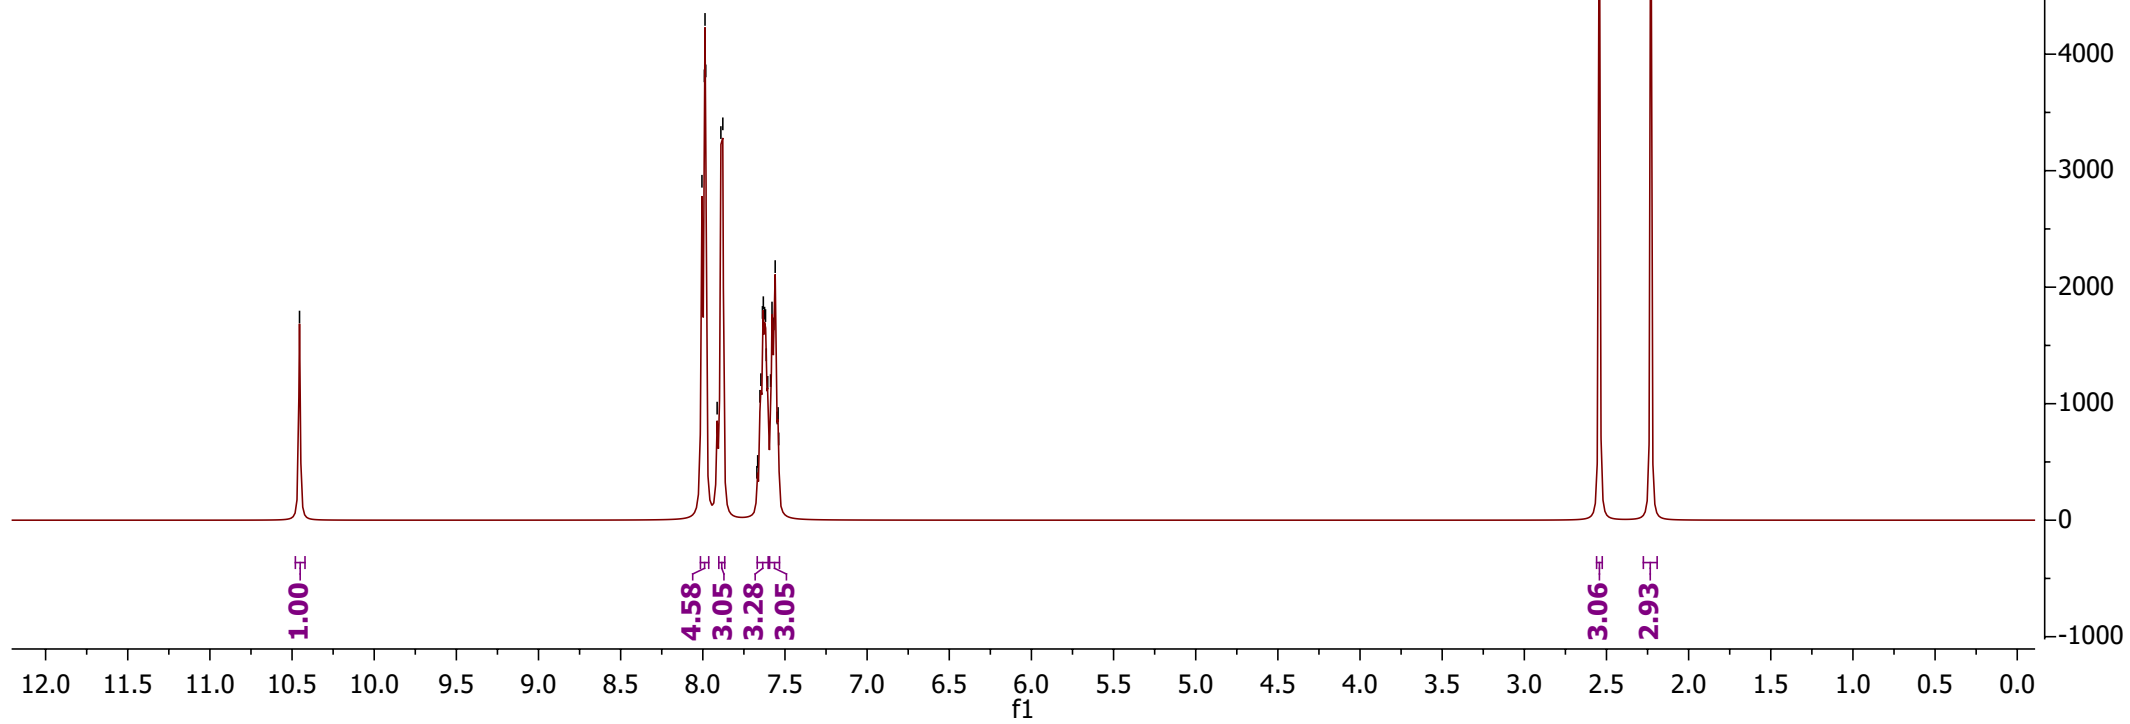

**<sup>13</sup>C NMR of 20a**

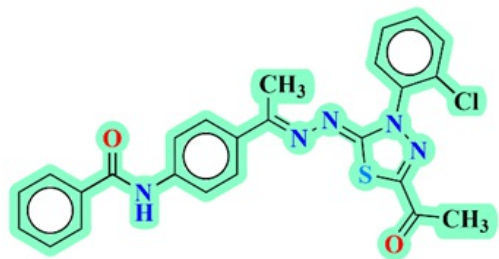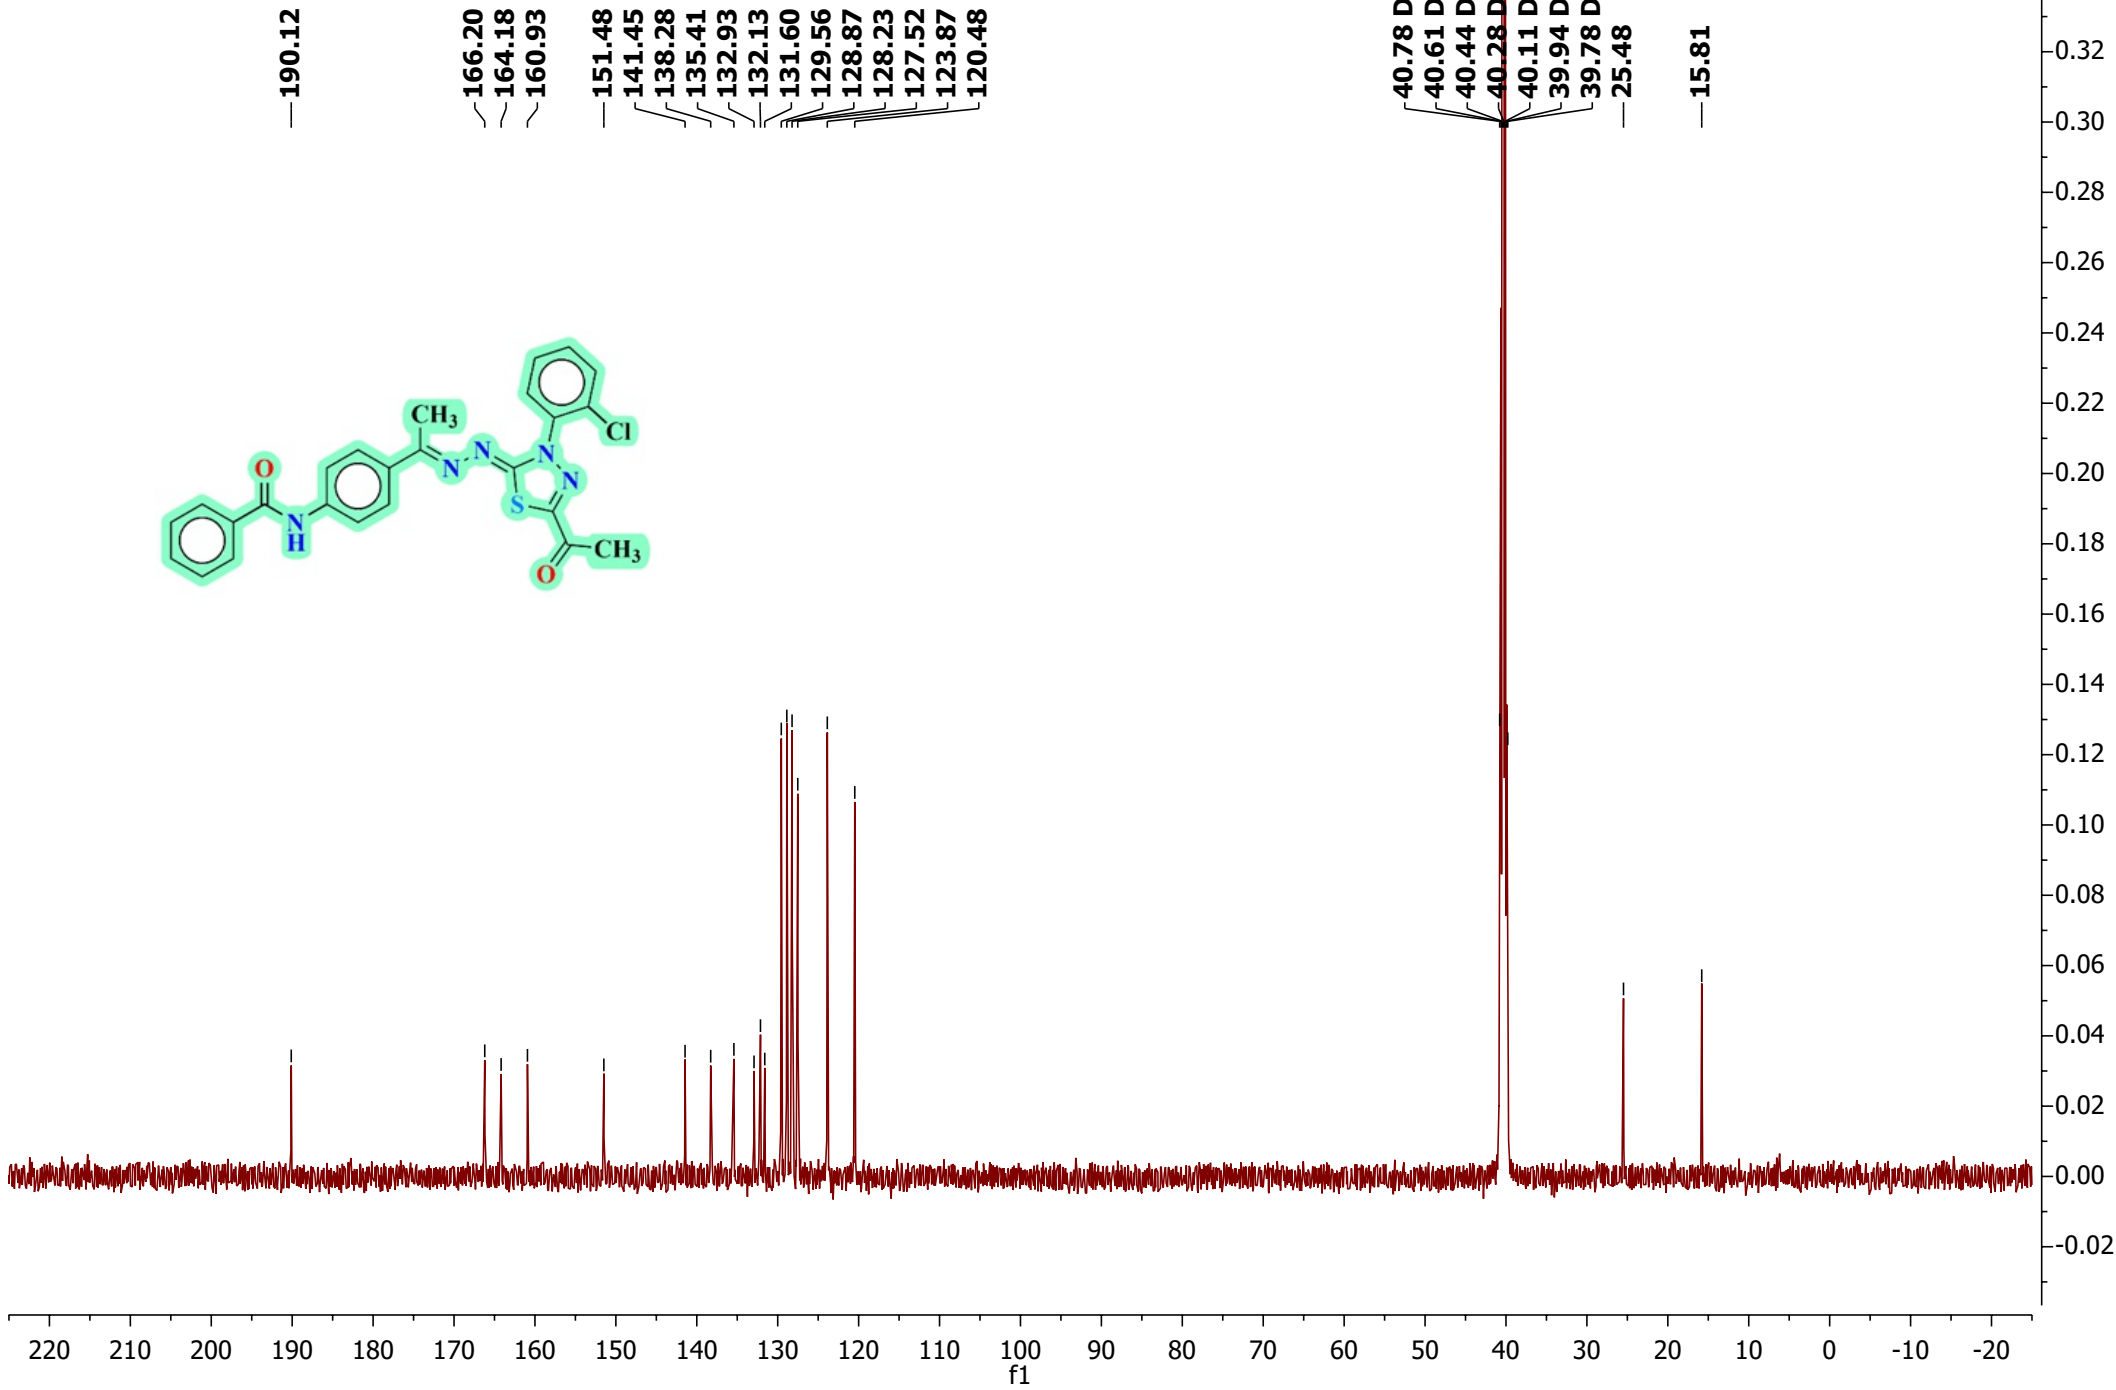

## Mass spec. of compound 20a

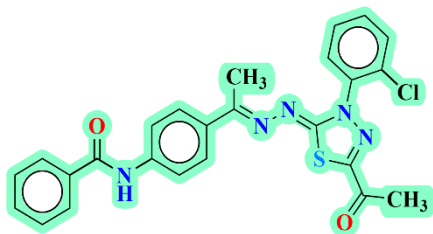

ibrahim-hassan-PH-5 #182 RT: 3.06 AV: 1 SB: 26 1.21-1.34 , 0.87-1.14 NL: 4.71E2  
T: {0,0} + c EI Full ms [40.00-1000.00]

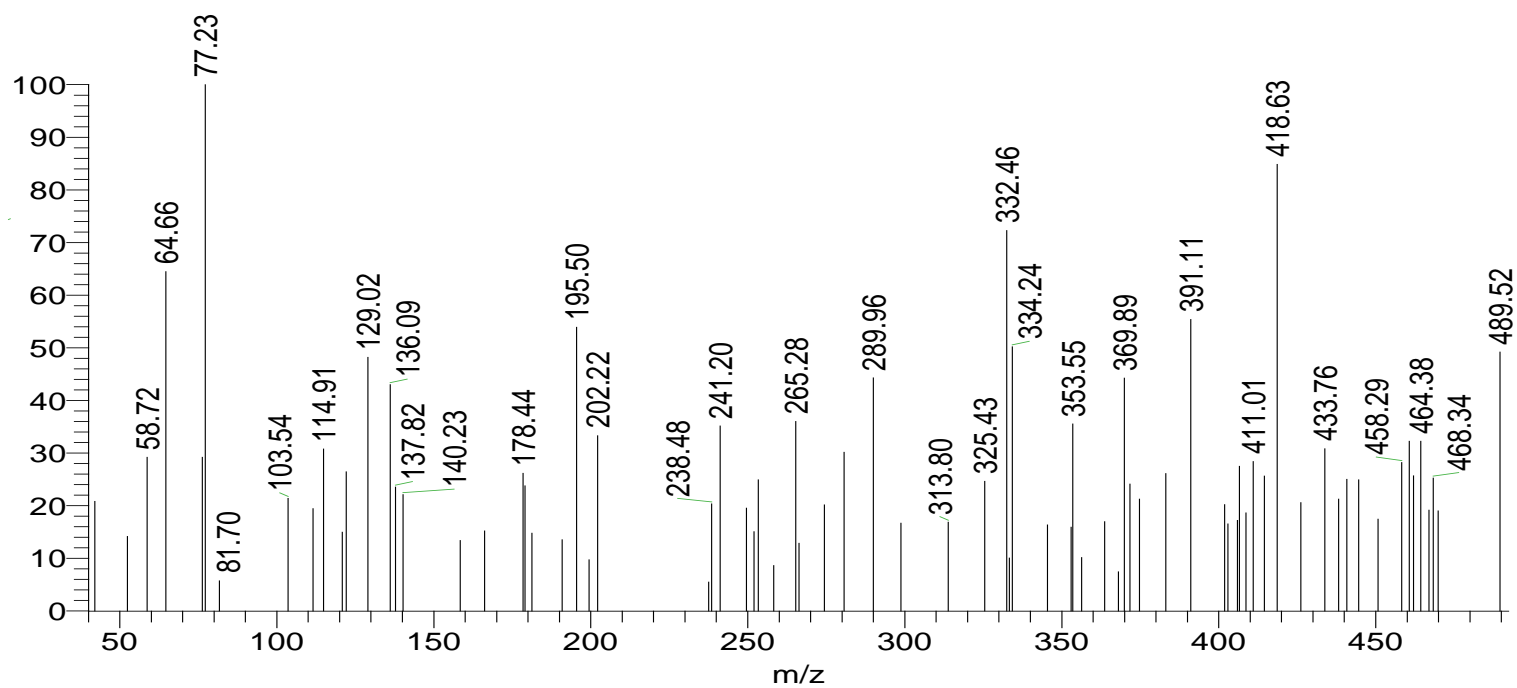

# IR of compound 20b

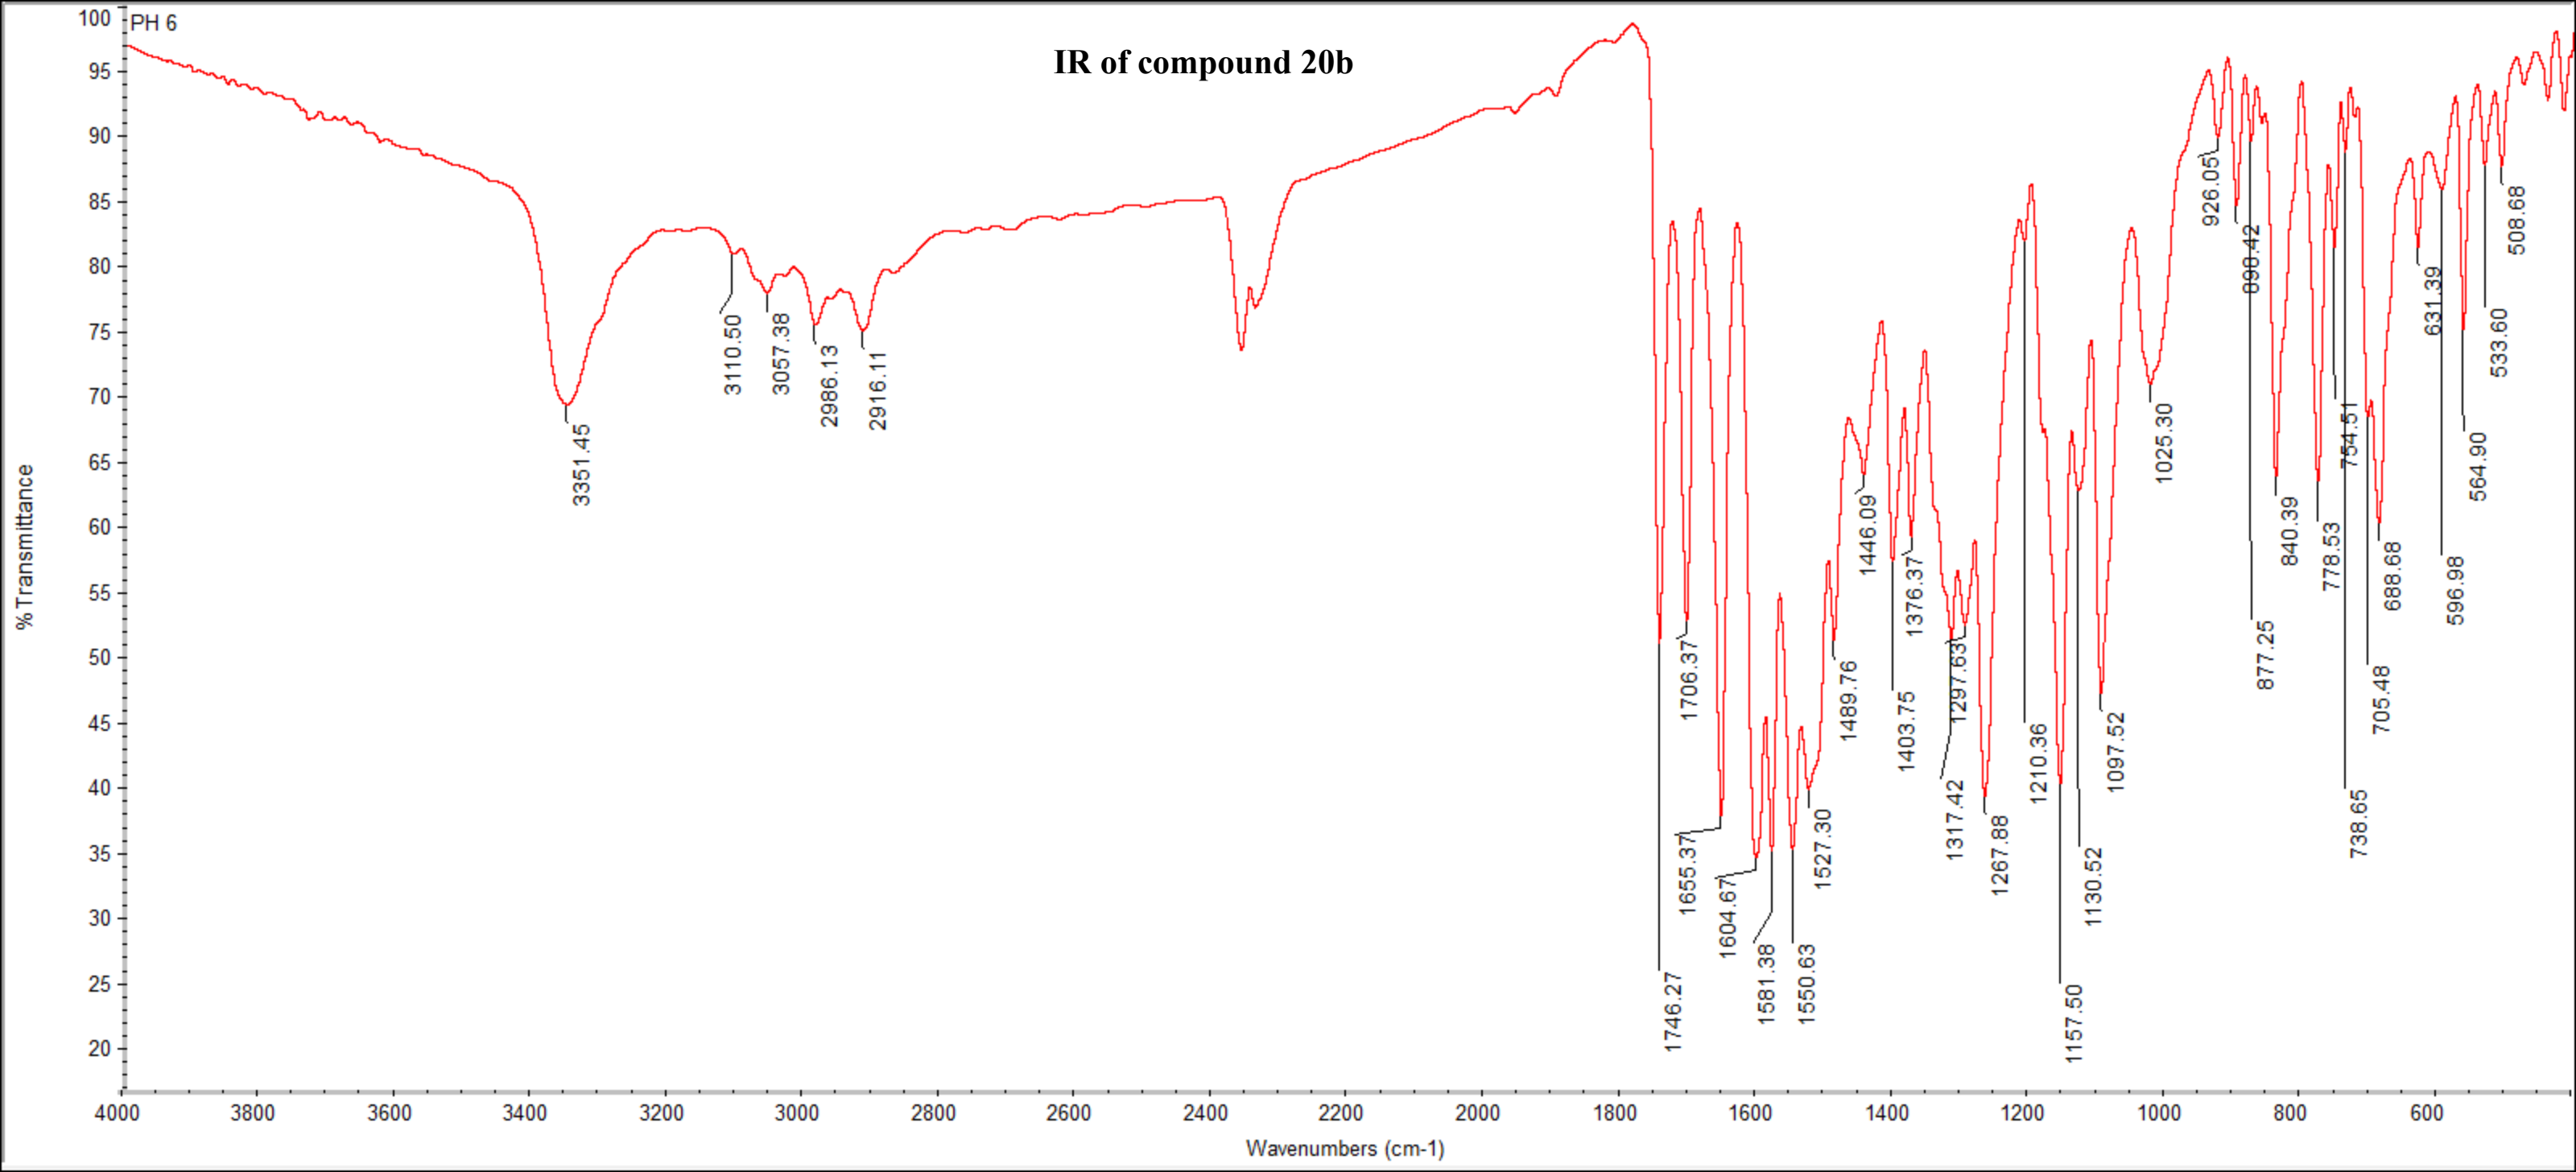

1H NMR of 20b

— 10.46

8.00  
7.99  
7.95  
7.93  
7.91  
7.65  
7.63  
7.61  
7.58  
7.57  
7.55  
7.42  
7.40

2.61  
2.43  
2.40

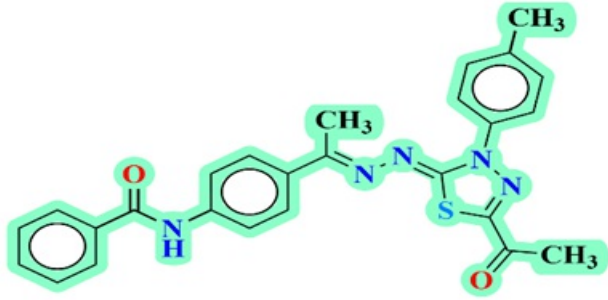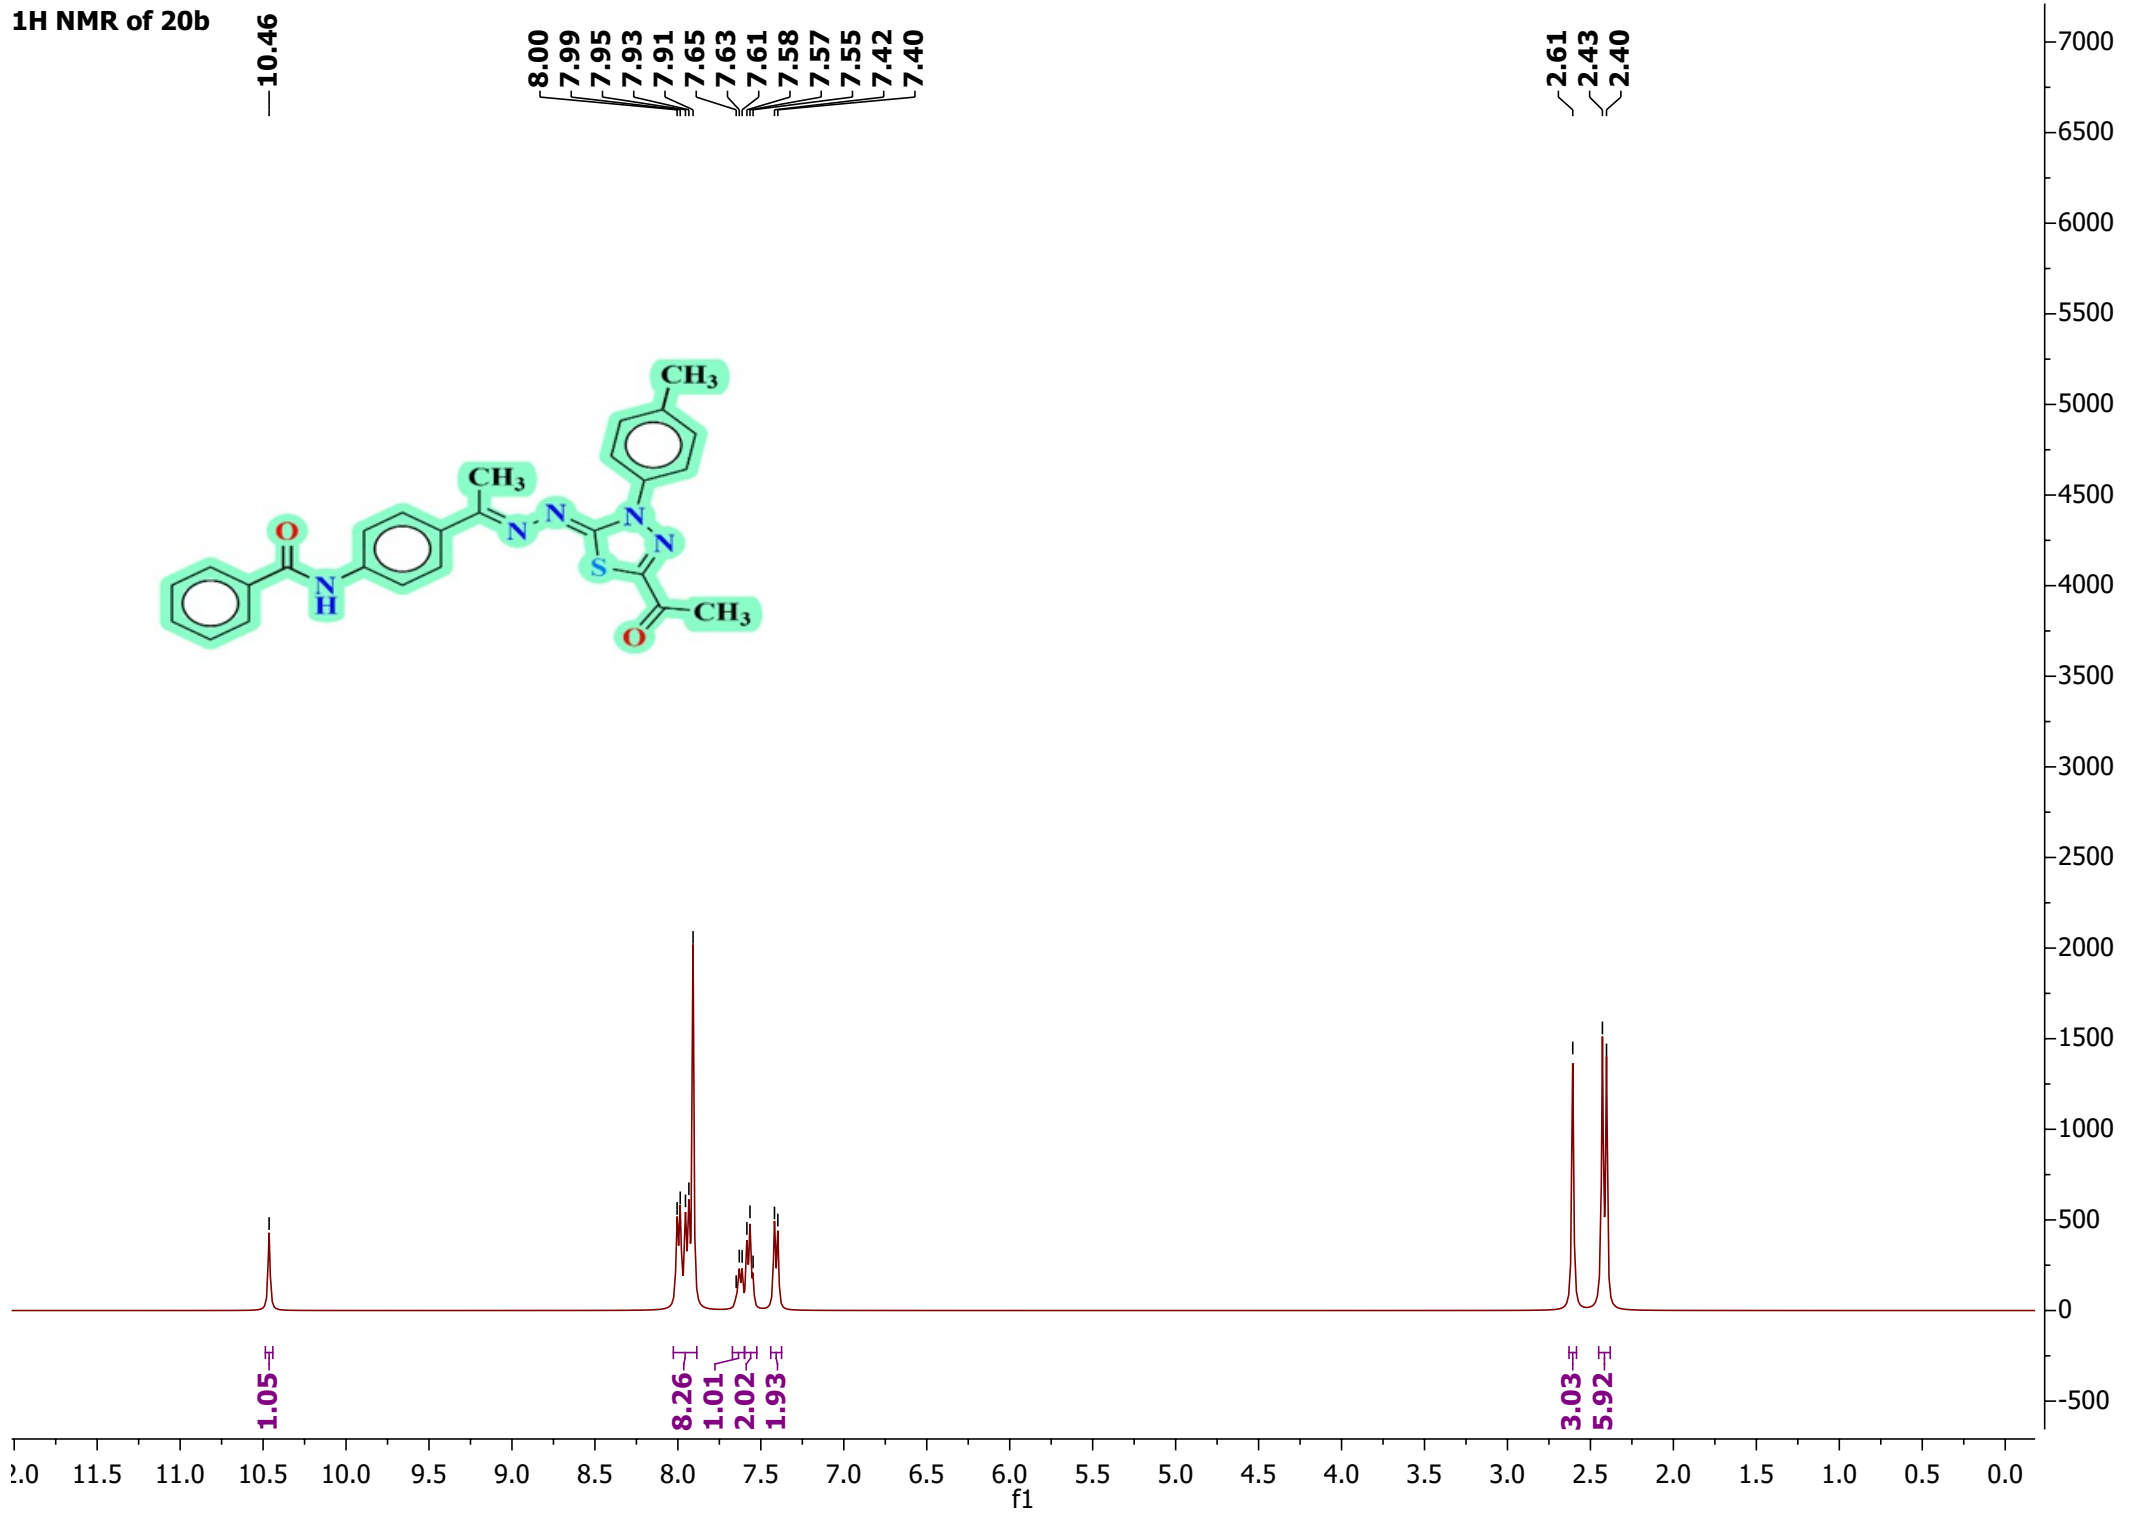



**<sup>13</sup>C NMR of 20b**

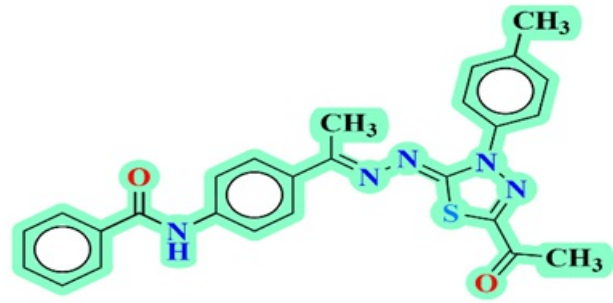

— 190.23

~ 166.17  
~ 164.67  
~ 160.28

— 150.87  
141.29  
137.28  
136.88  
135.25  
132.83  
132.21  
130.02  
128.91  
128.22  
127.45  
122.57  
120.33

40.61 DMSO  
40.40 DMSO  
40.20 DMSO  
~~39.99 DMSO~~  
39.78 DMSO  
39.57 DMSO  
39.36 DMSO  
25.52  
21.11  
15.68

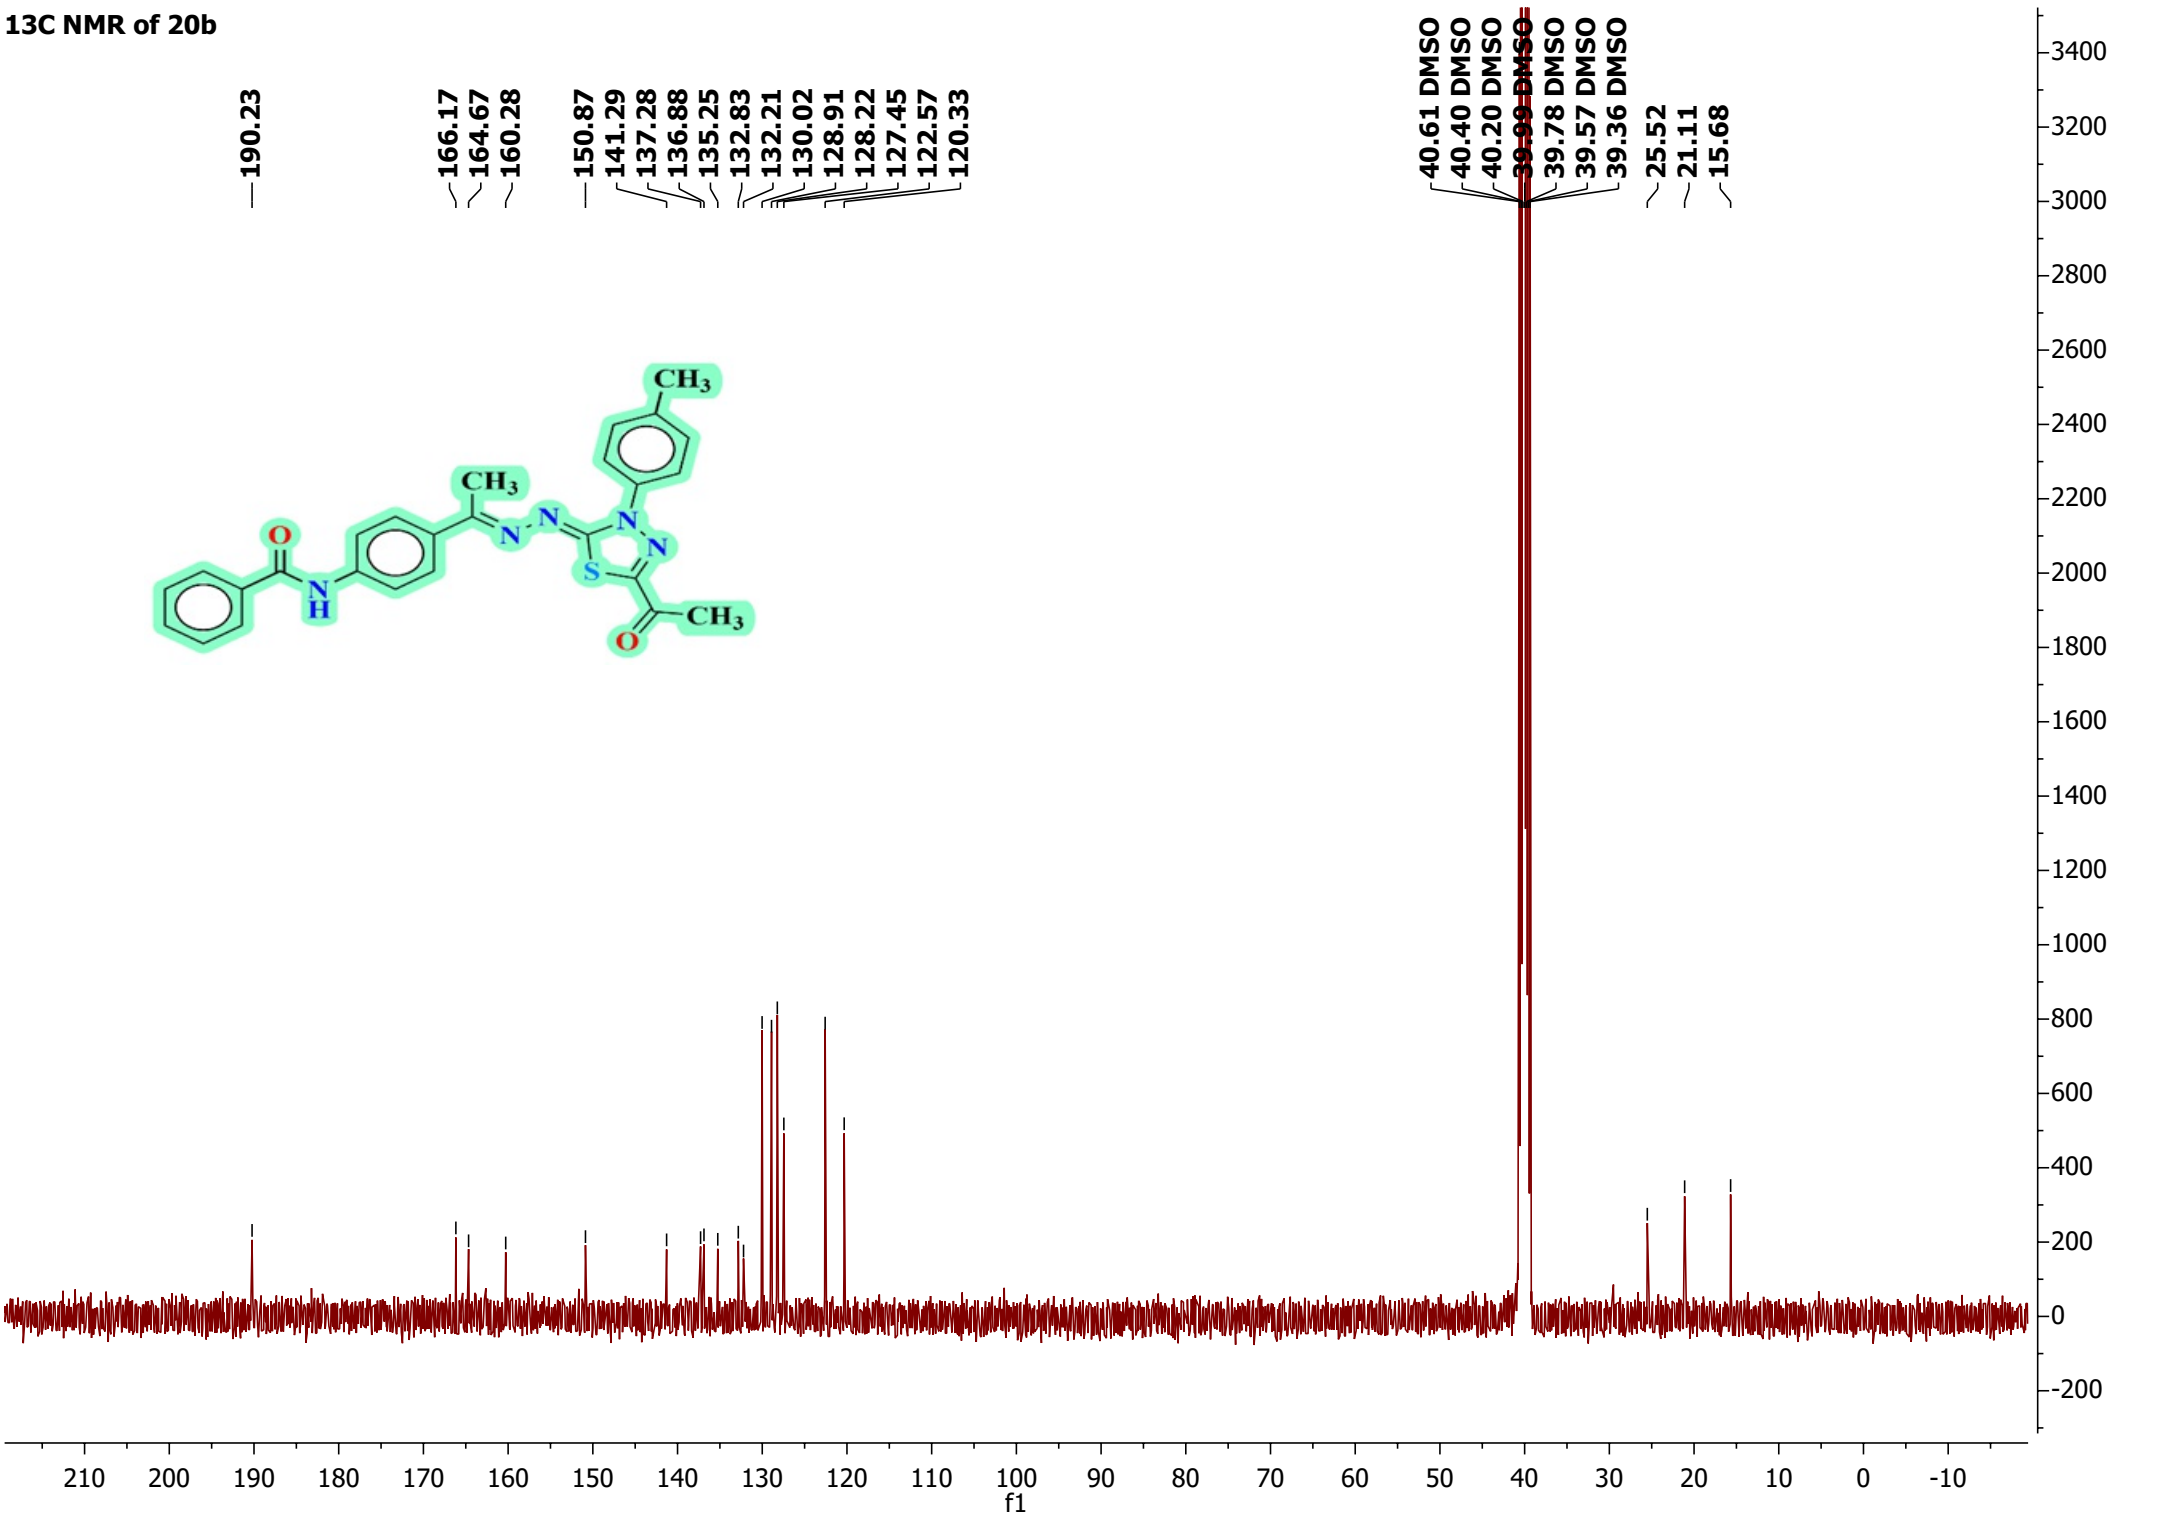

## Mass spec. of compound 20b

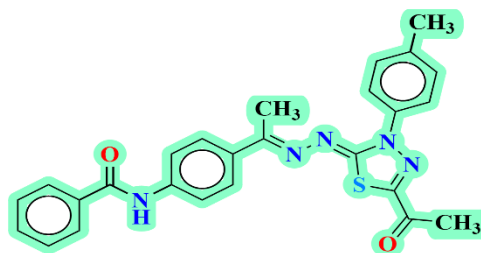

ibrahim-hassan-PH-7 #136-154 RT: 2.29-2.59 AV: 19 SB: 26 1.21-1.34 , 0.87-1.14 NL: 2.28E3  
T: {0,0} + c EI Full ms [40.00-1000.00]

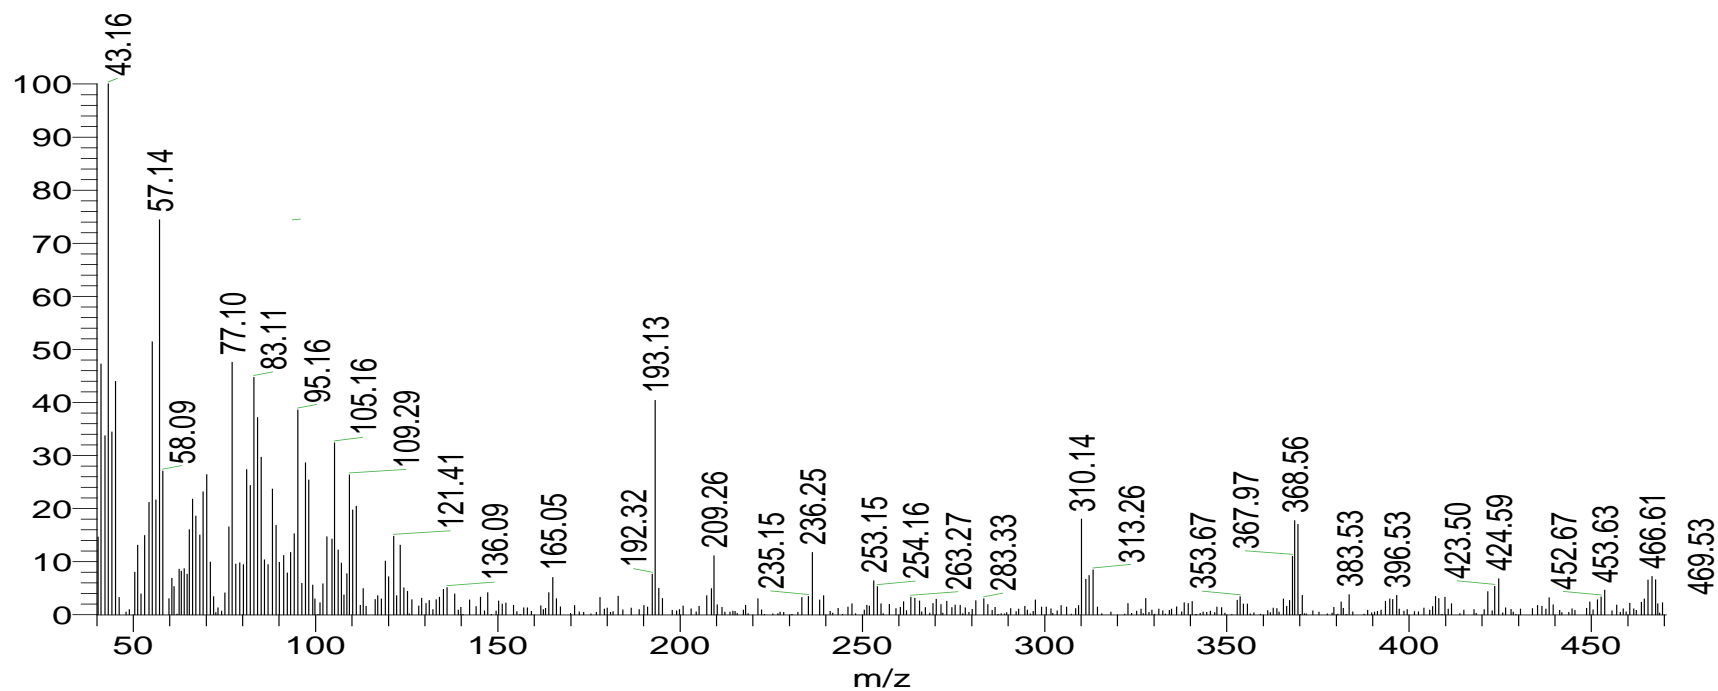

# IR of compound 21a

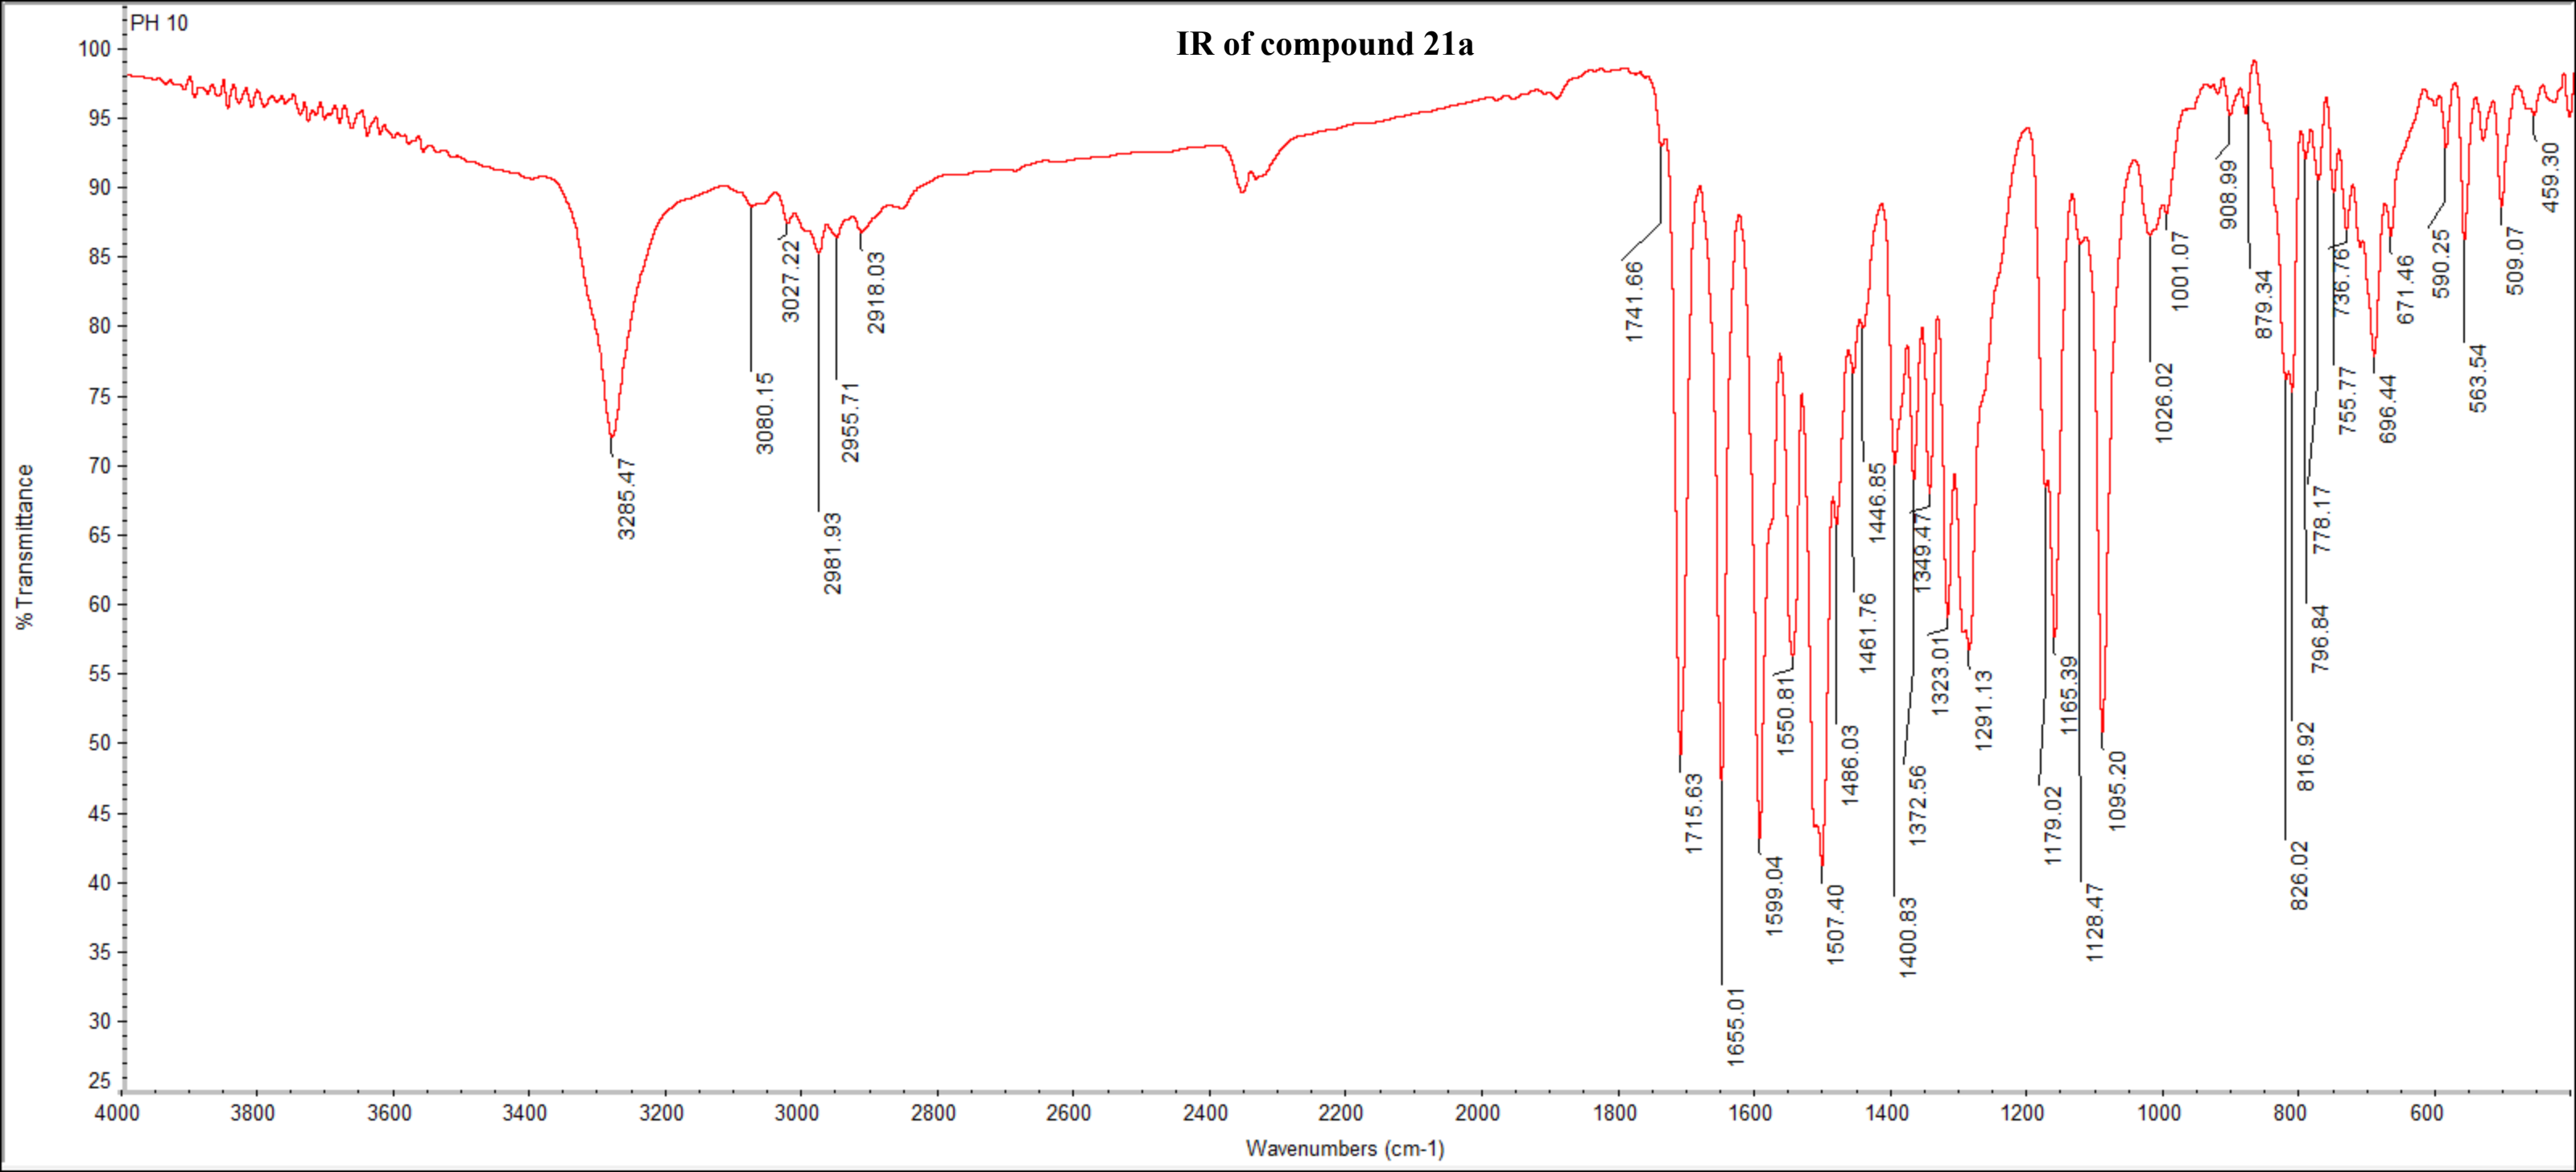

1H NMR of 21a

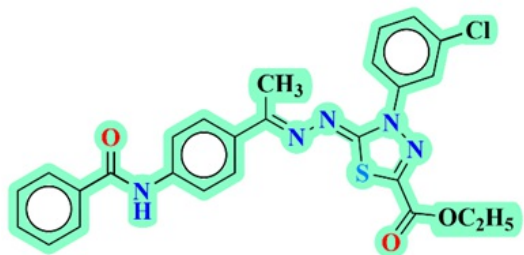

10.47  
8.22  
8.22  
8.21  
8.03  
8.02  
8.01  
8.00  
7.99  
7.99  
7.98  
7.91  
7.65  
7.64  
7.63  
7.63  
7.62  
7.62  
7.61  
7.60  
7.59  
7.57  
7.57  
7.55  
7.55  
7.55  
7.49  
7.49  
7.49  
7.47  
7.47  
7.47  
7.47

4.44  
4.43  
4.41  
4.39

2.46

1.38  
1.36  
1.34

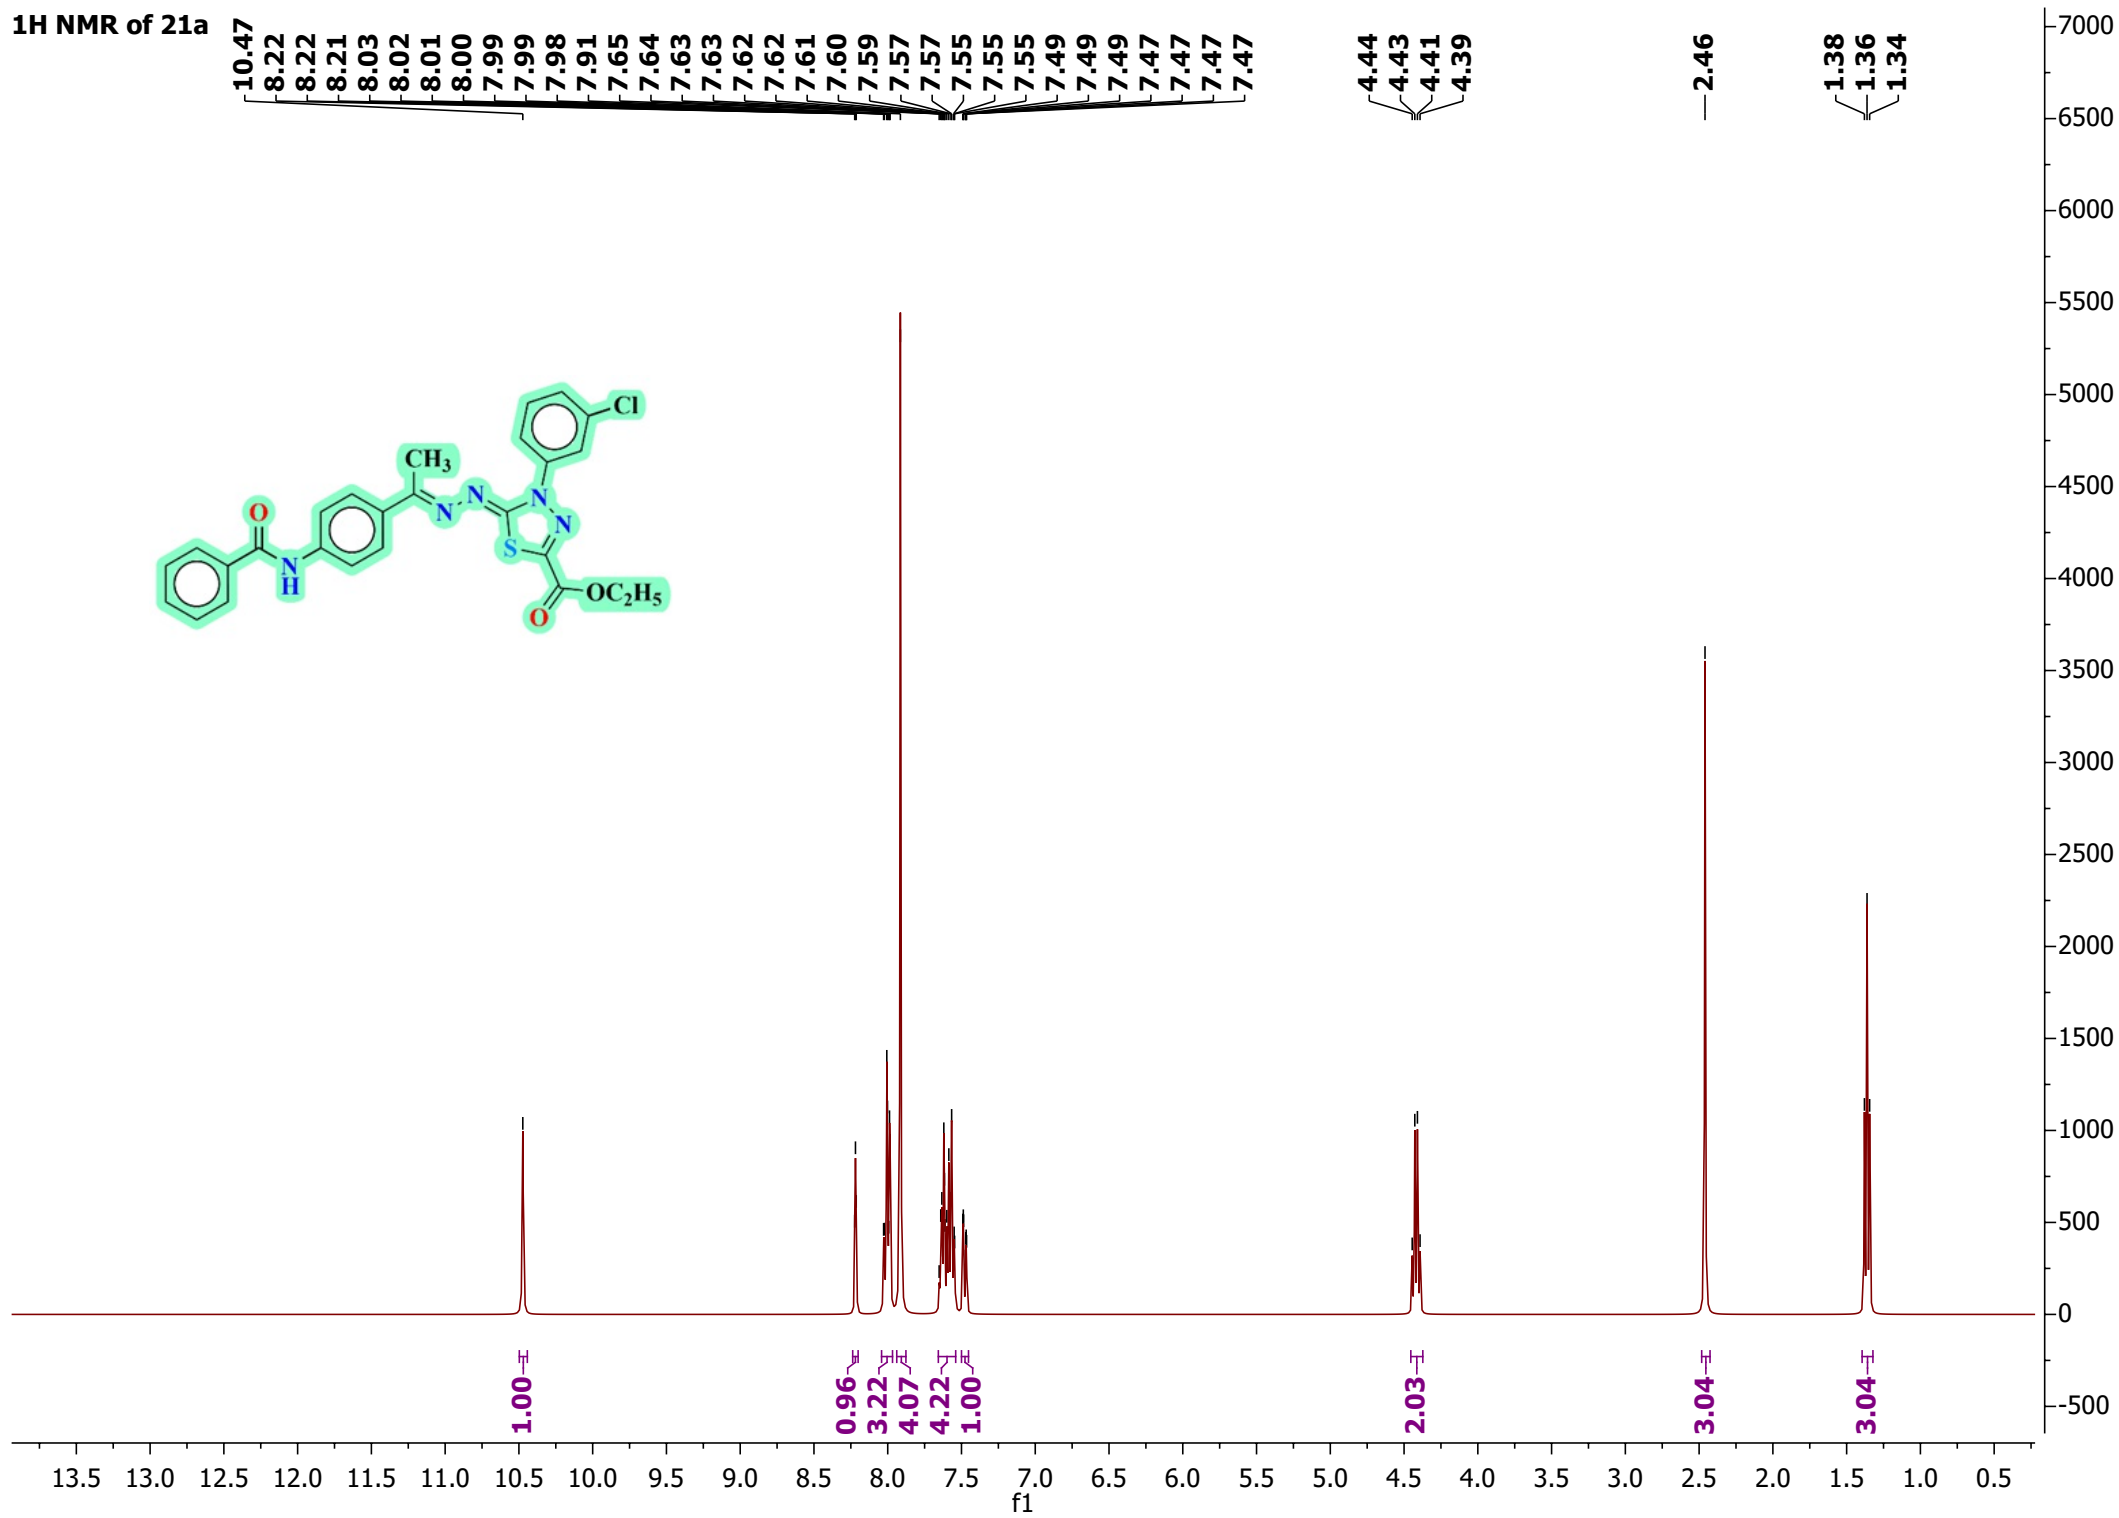

**<sup>13</sup>C NMR of 21a**

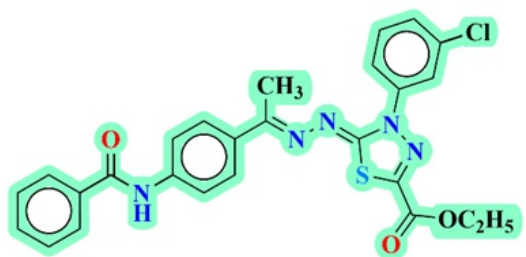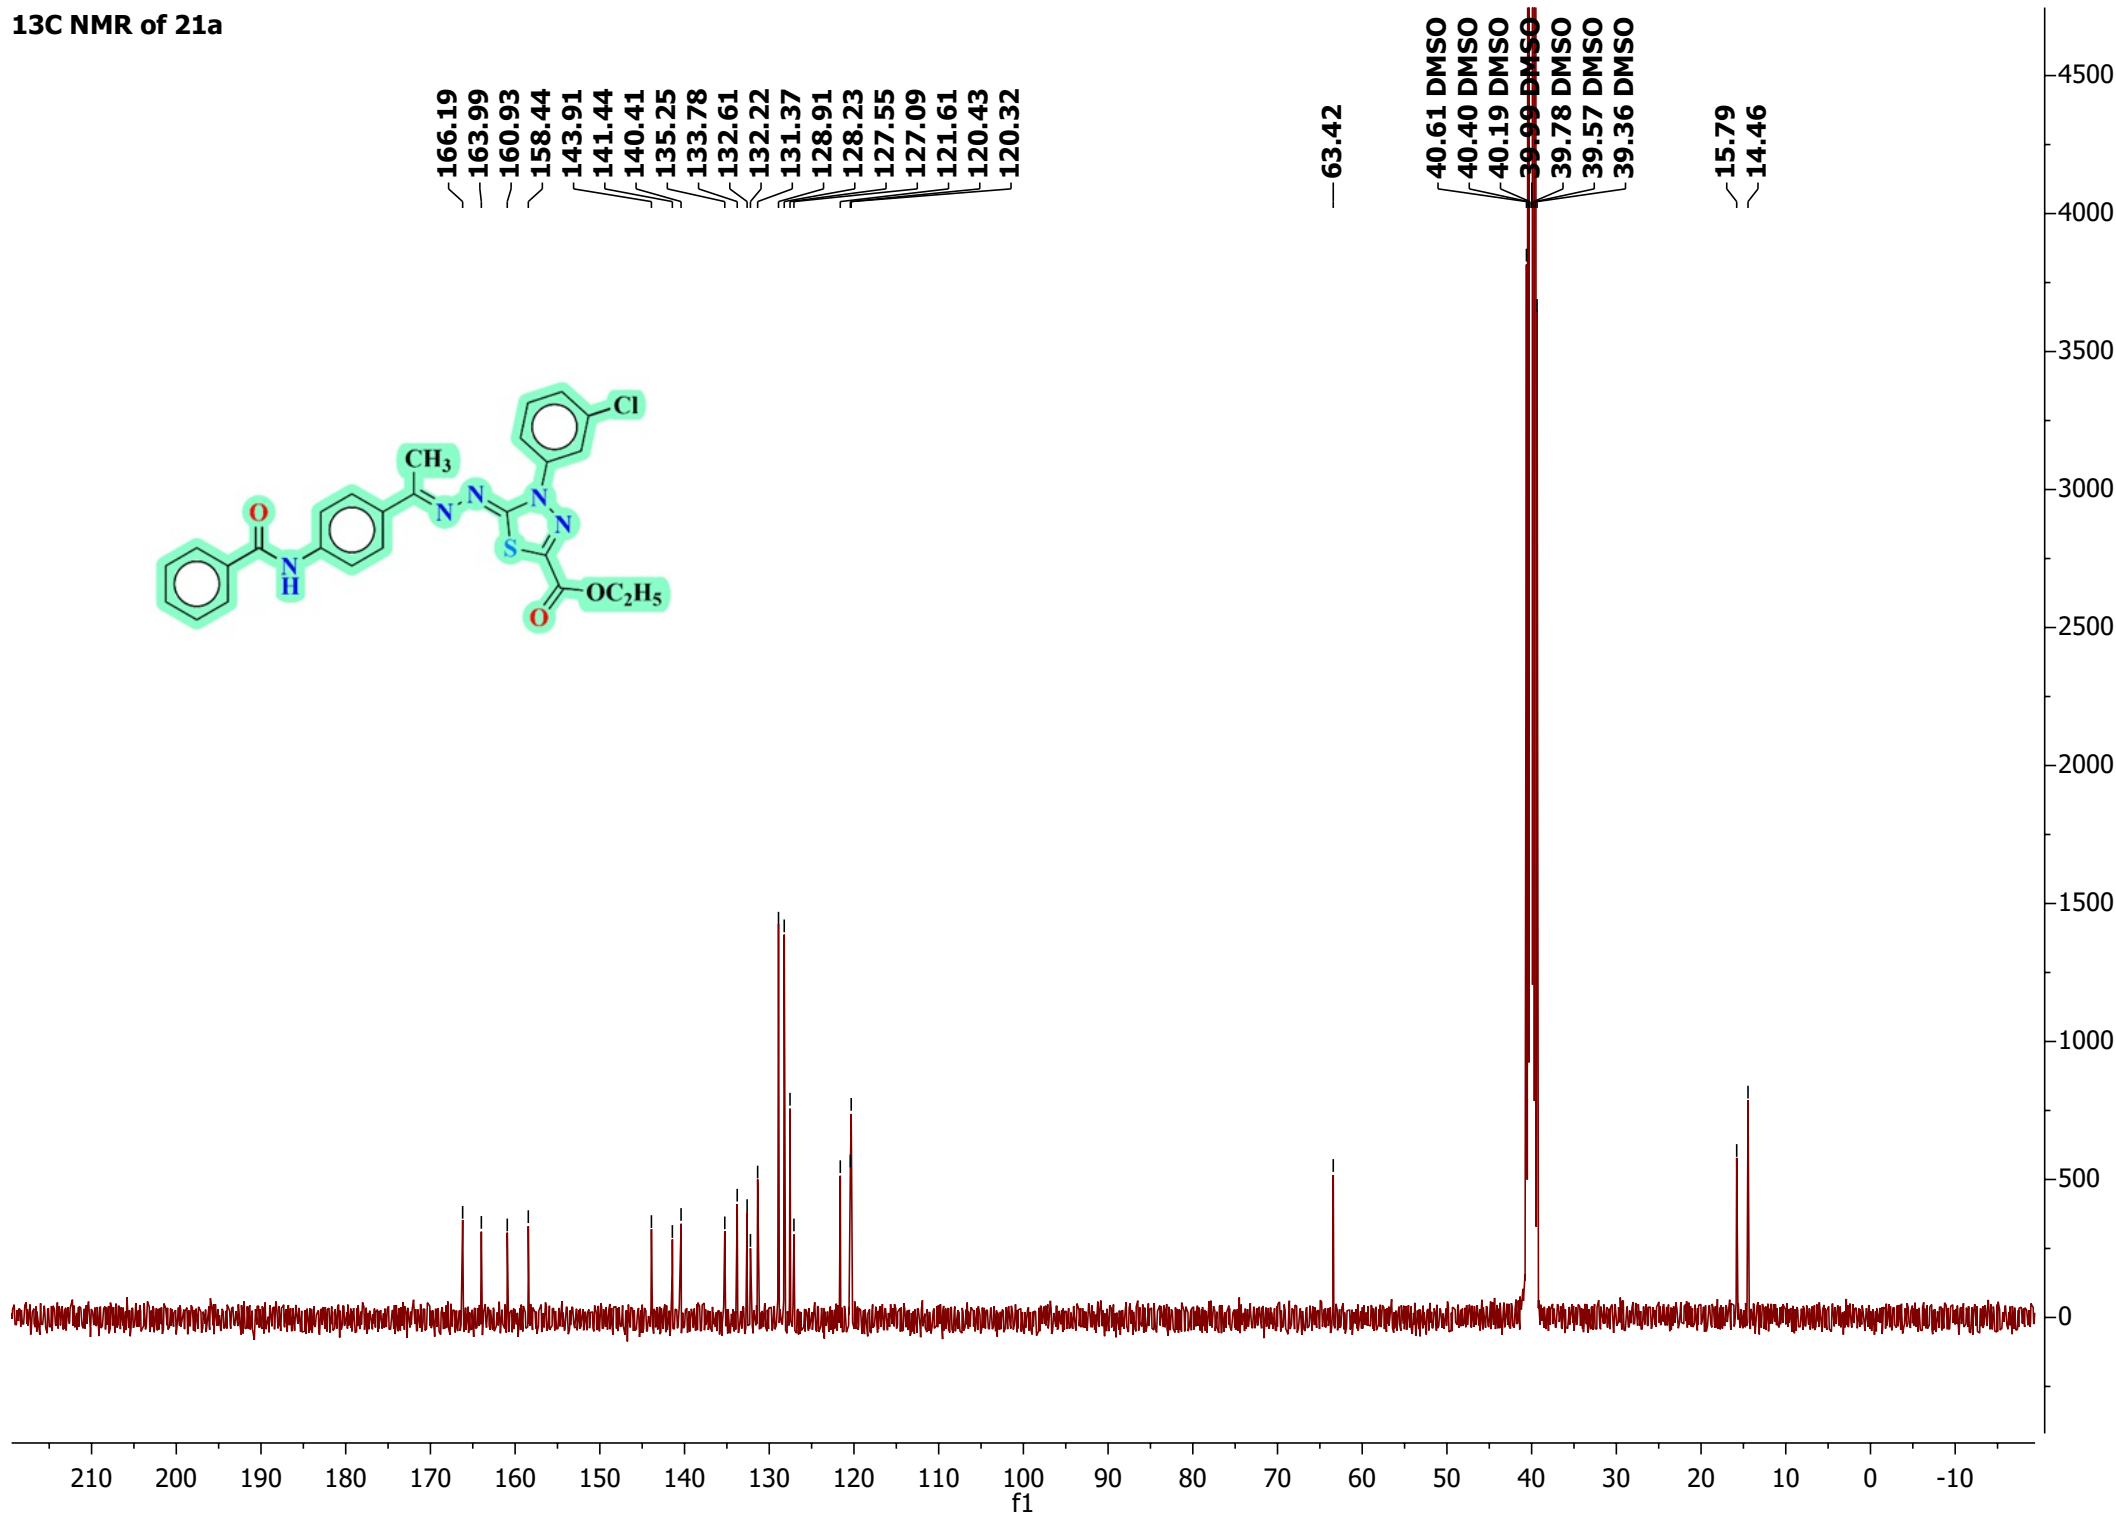

## Mass spec. of compound 21a

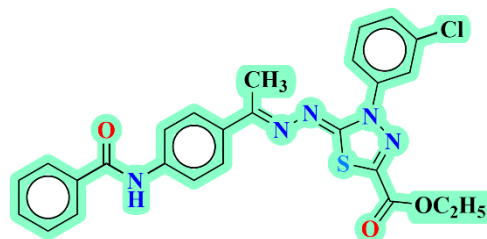

ibrahim-hassan-PH-8 #231 RT: 3.88 AV: 1 SB: 26 1.21-1.34 , 0.87-1.14 NL: 2.03E4  
T: {0,0} + c EI Full ms [40.00-1000.00]

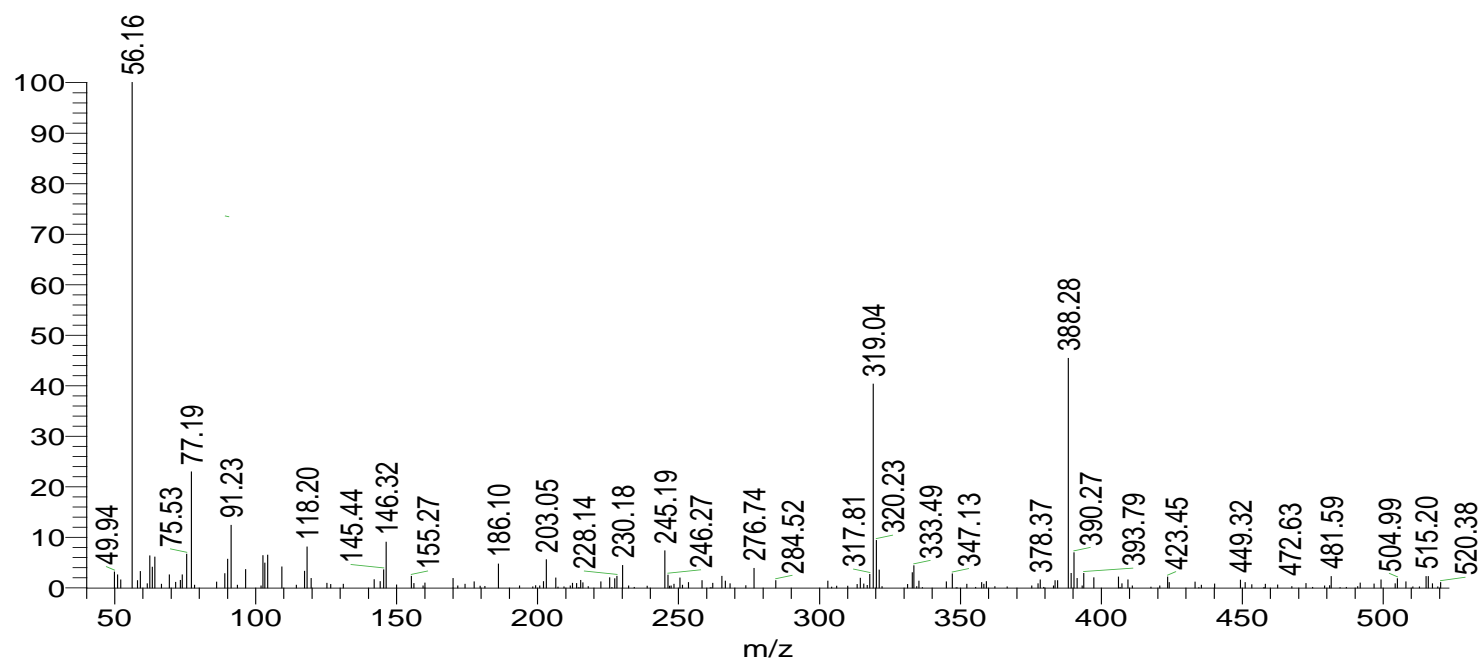

# IR of compound 21b

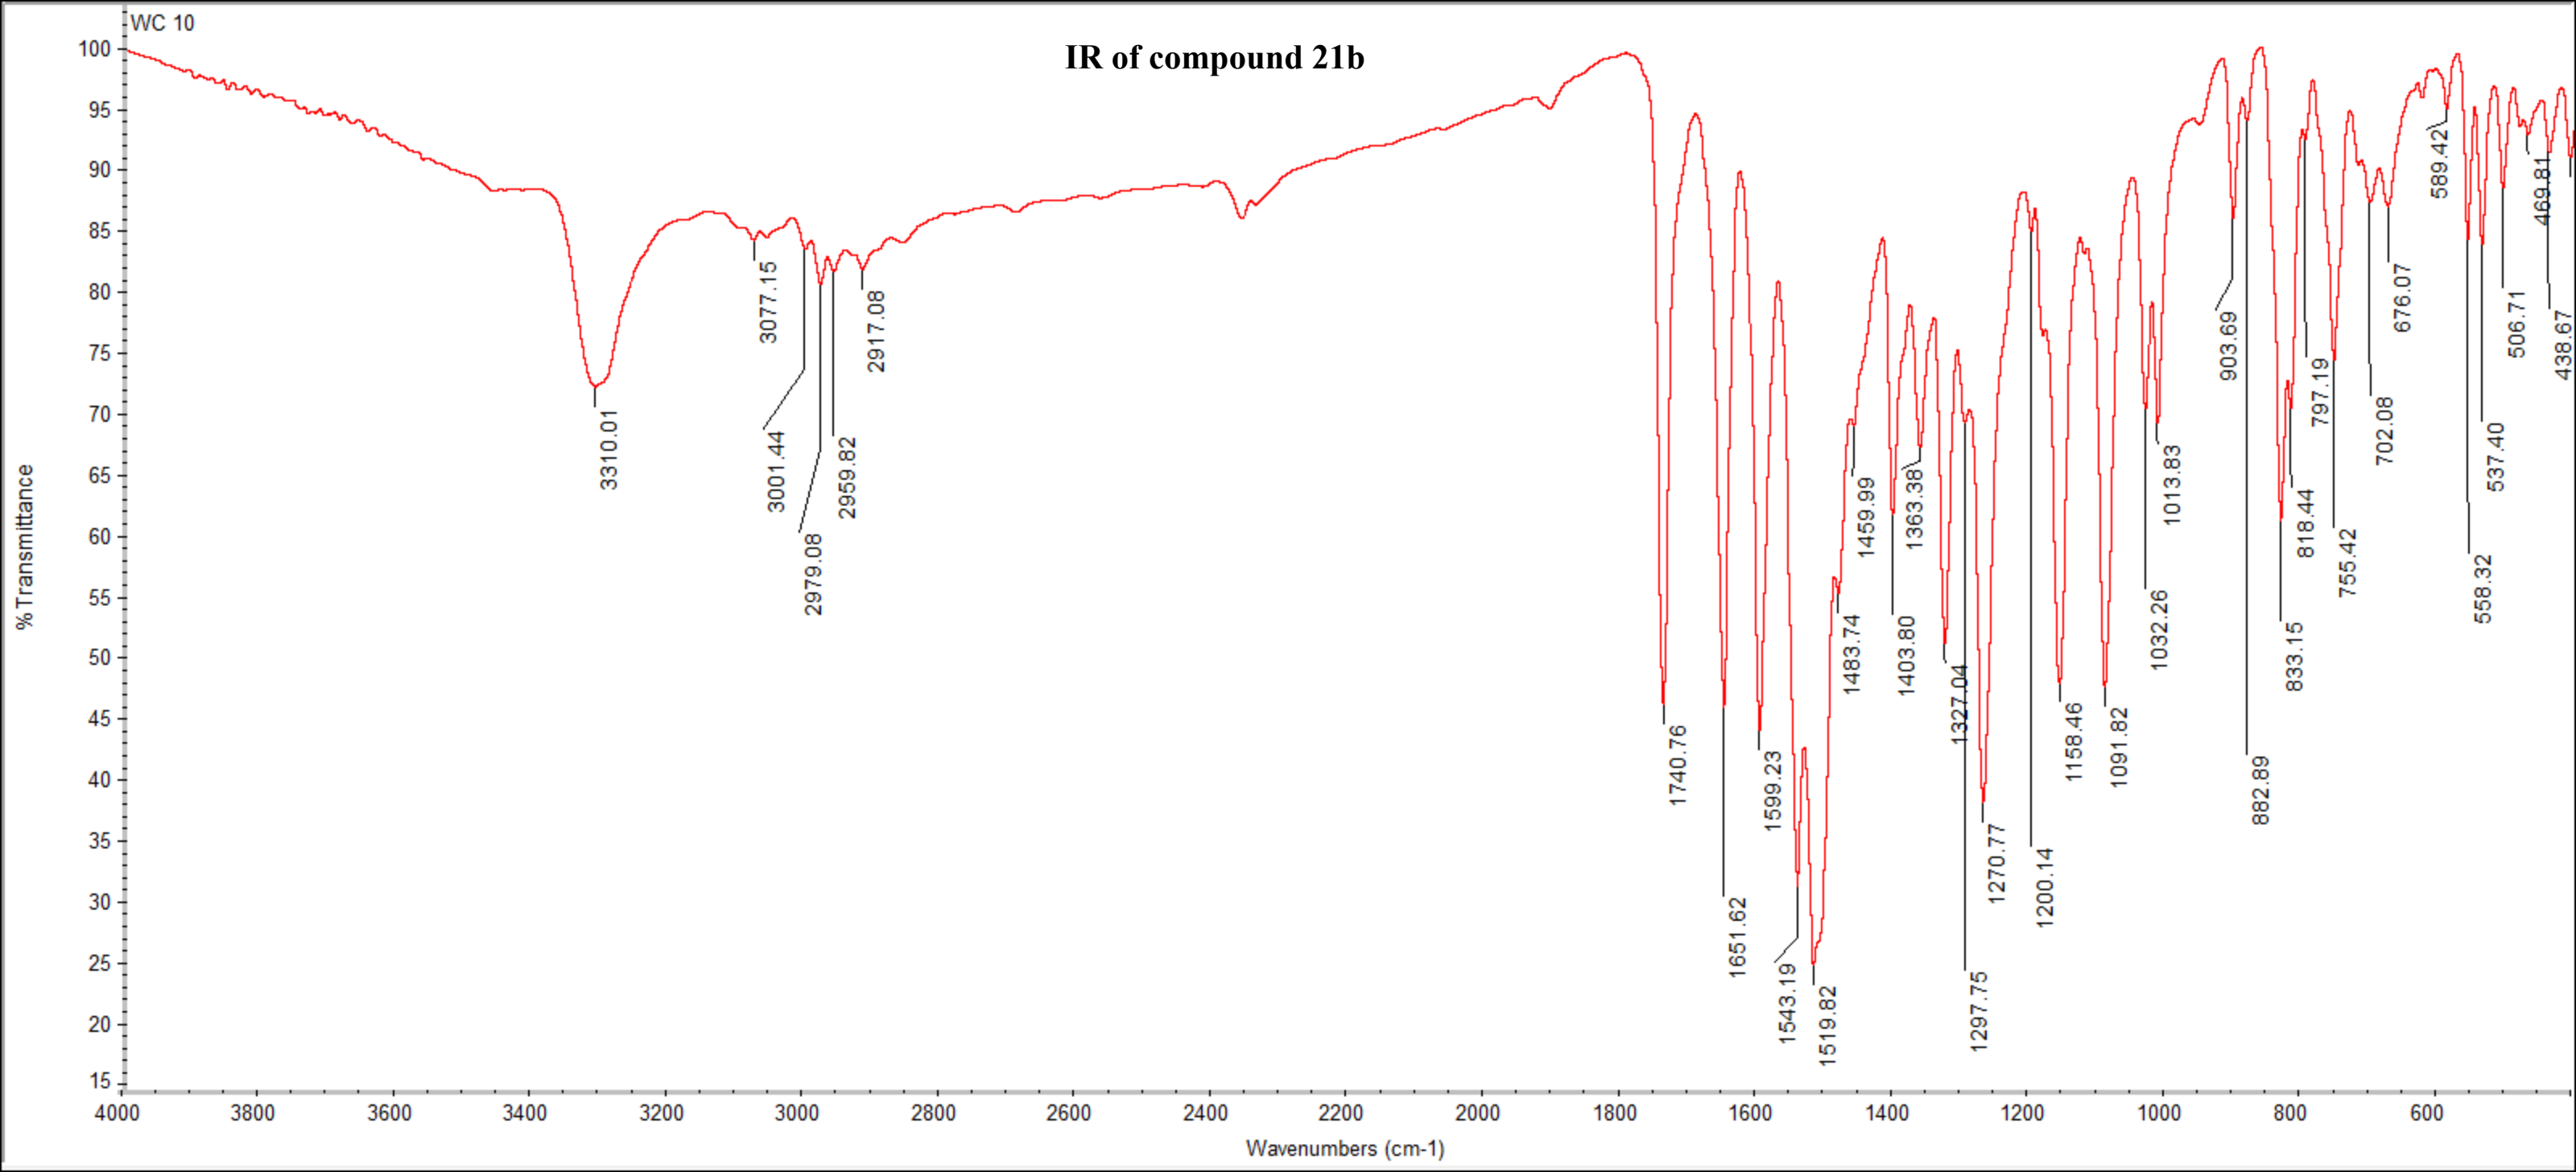

1H NMR of 21b

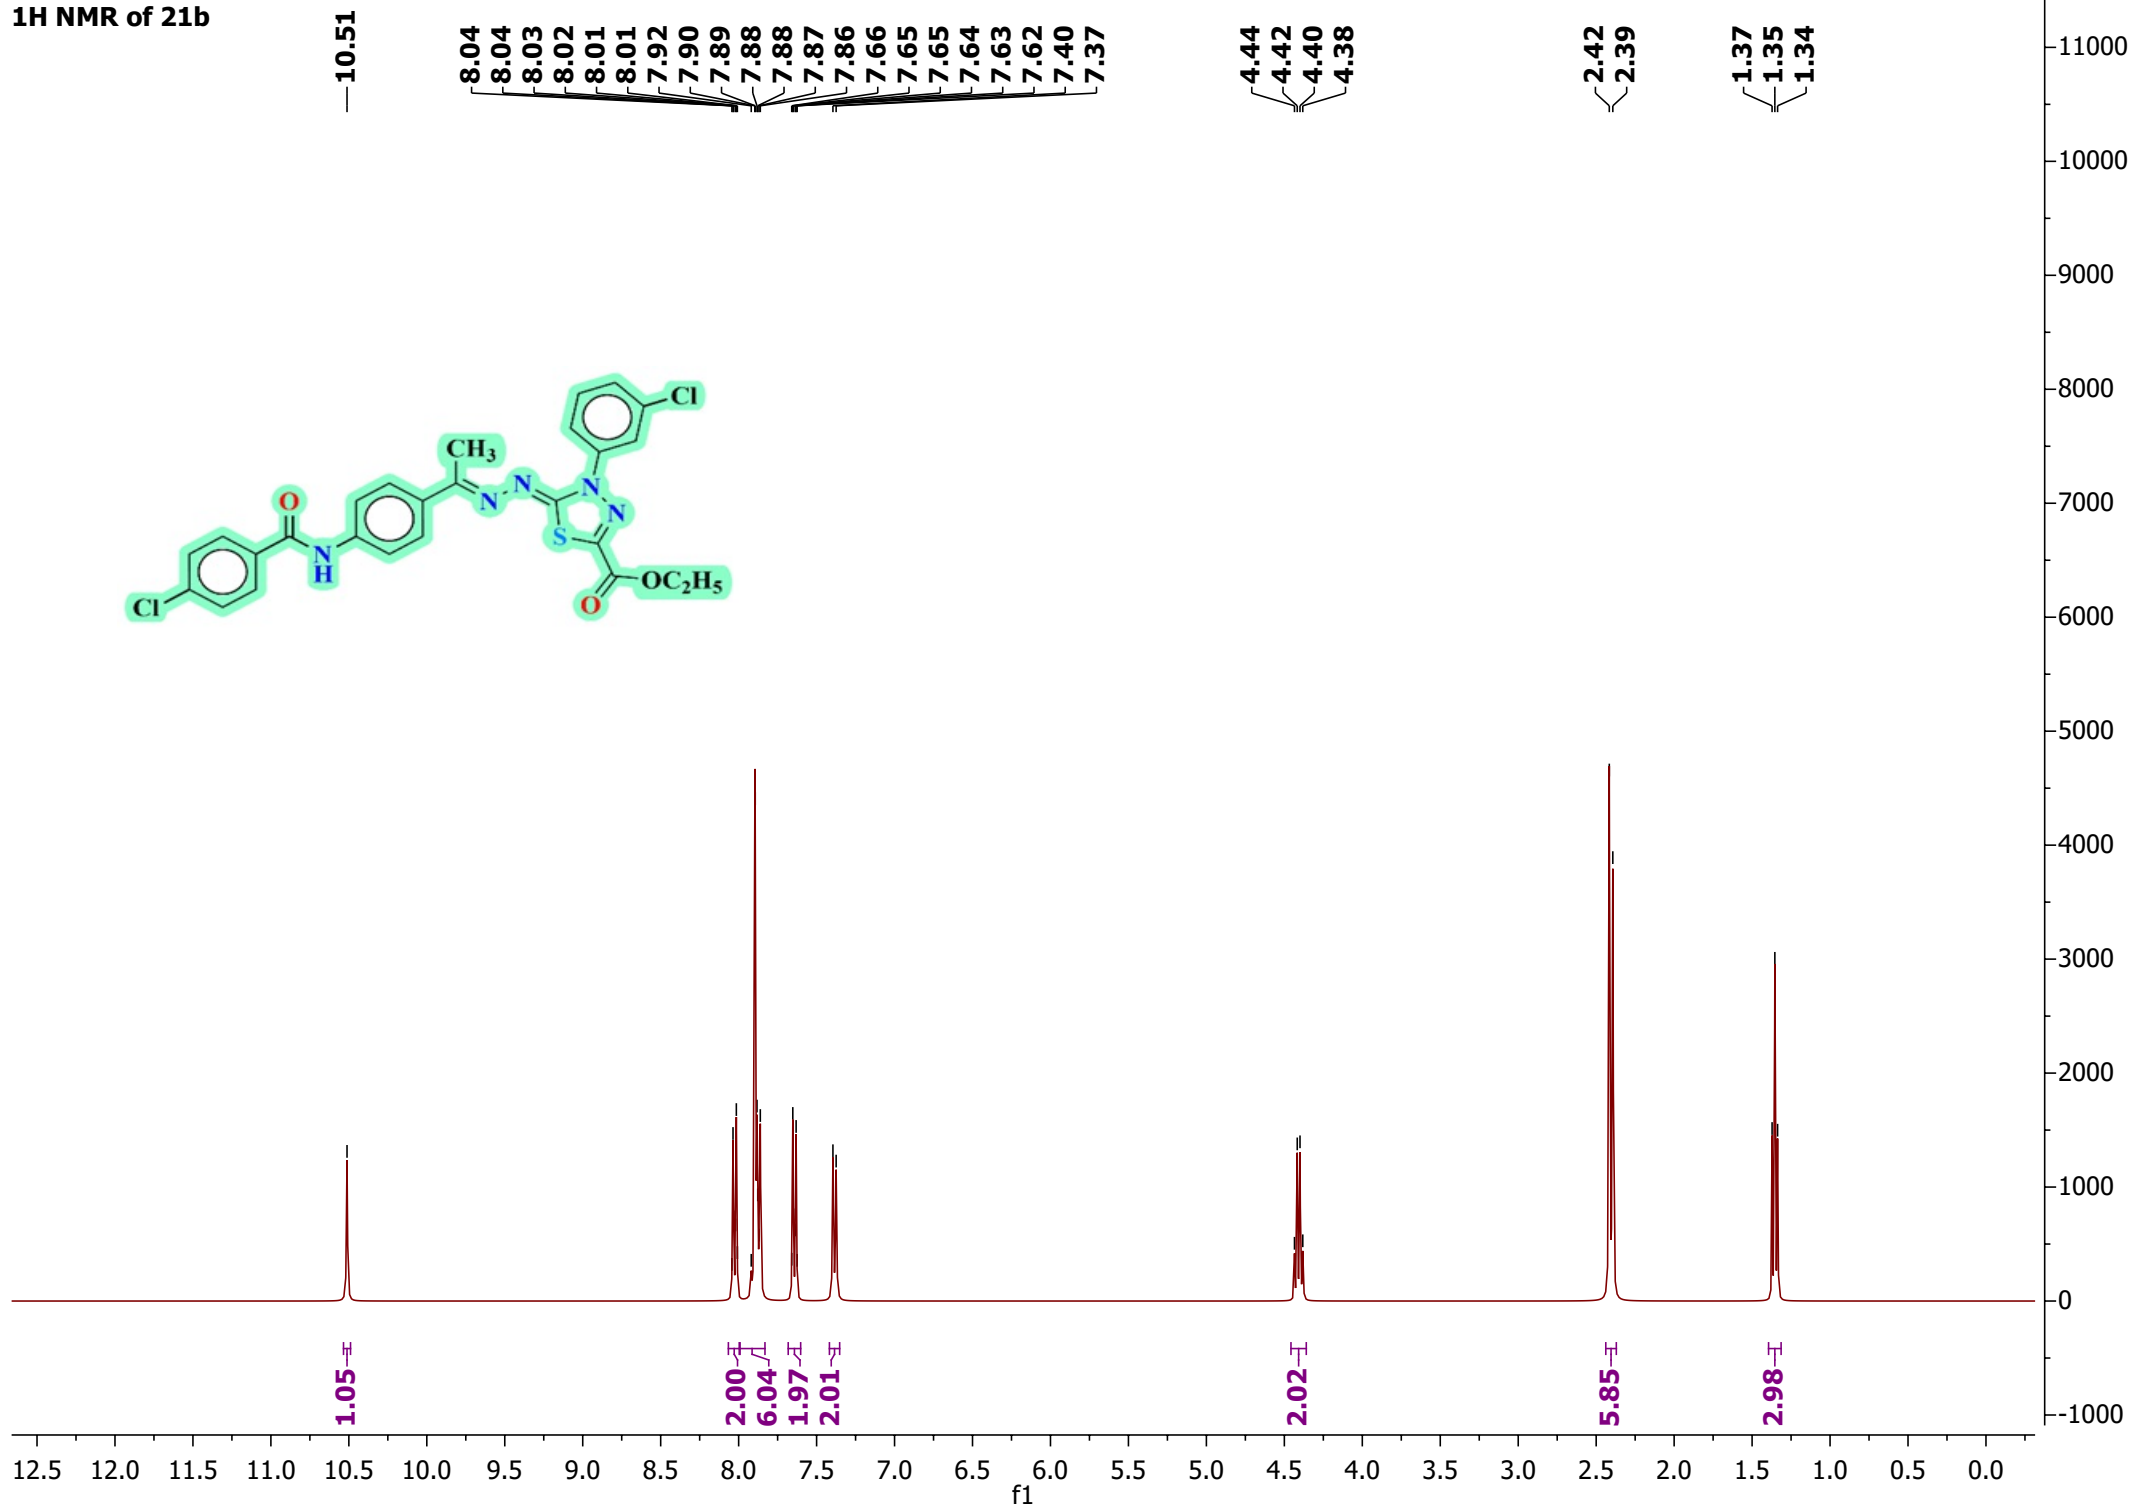



# <sup>13</sup>C NMR of 21b

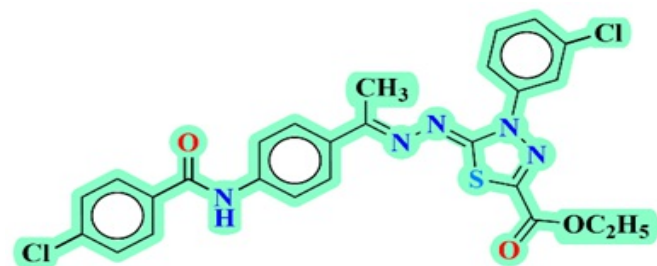

164.46  
160.14  
158.62

142.90  
141.05  
137.25  
136.84  
133.94  
133.01  
130.20  
130.01  
128.99  
127.45  
122.60  
120.42

63.24

40.62 DMSO  
40.41 DMSO  
40.20 DMSO  
39.99 DMSO  
39.78 DMSO  
39.58 DMSO  
39.37 DMSO

21.10  
15.68  
14.48

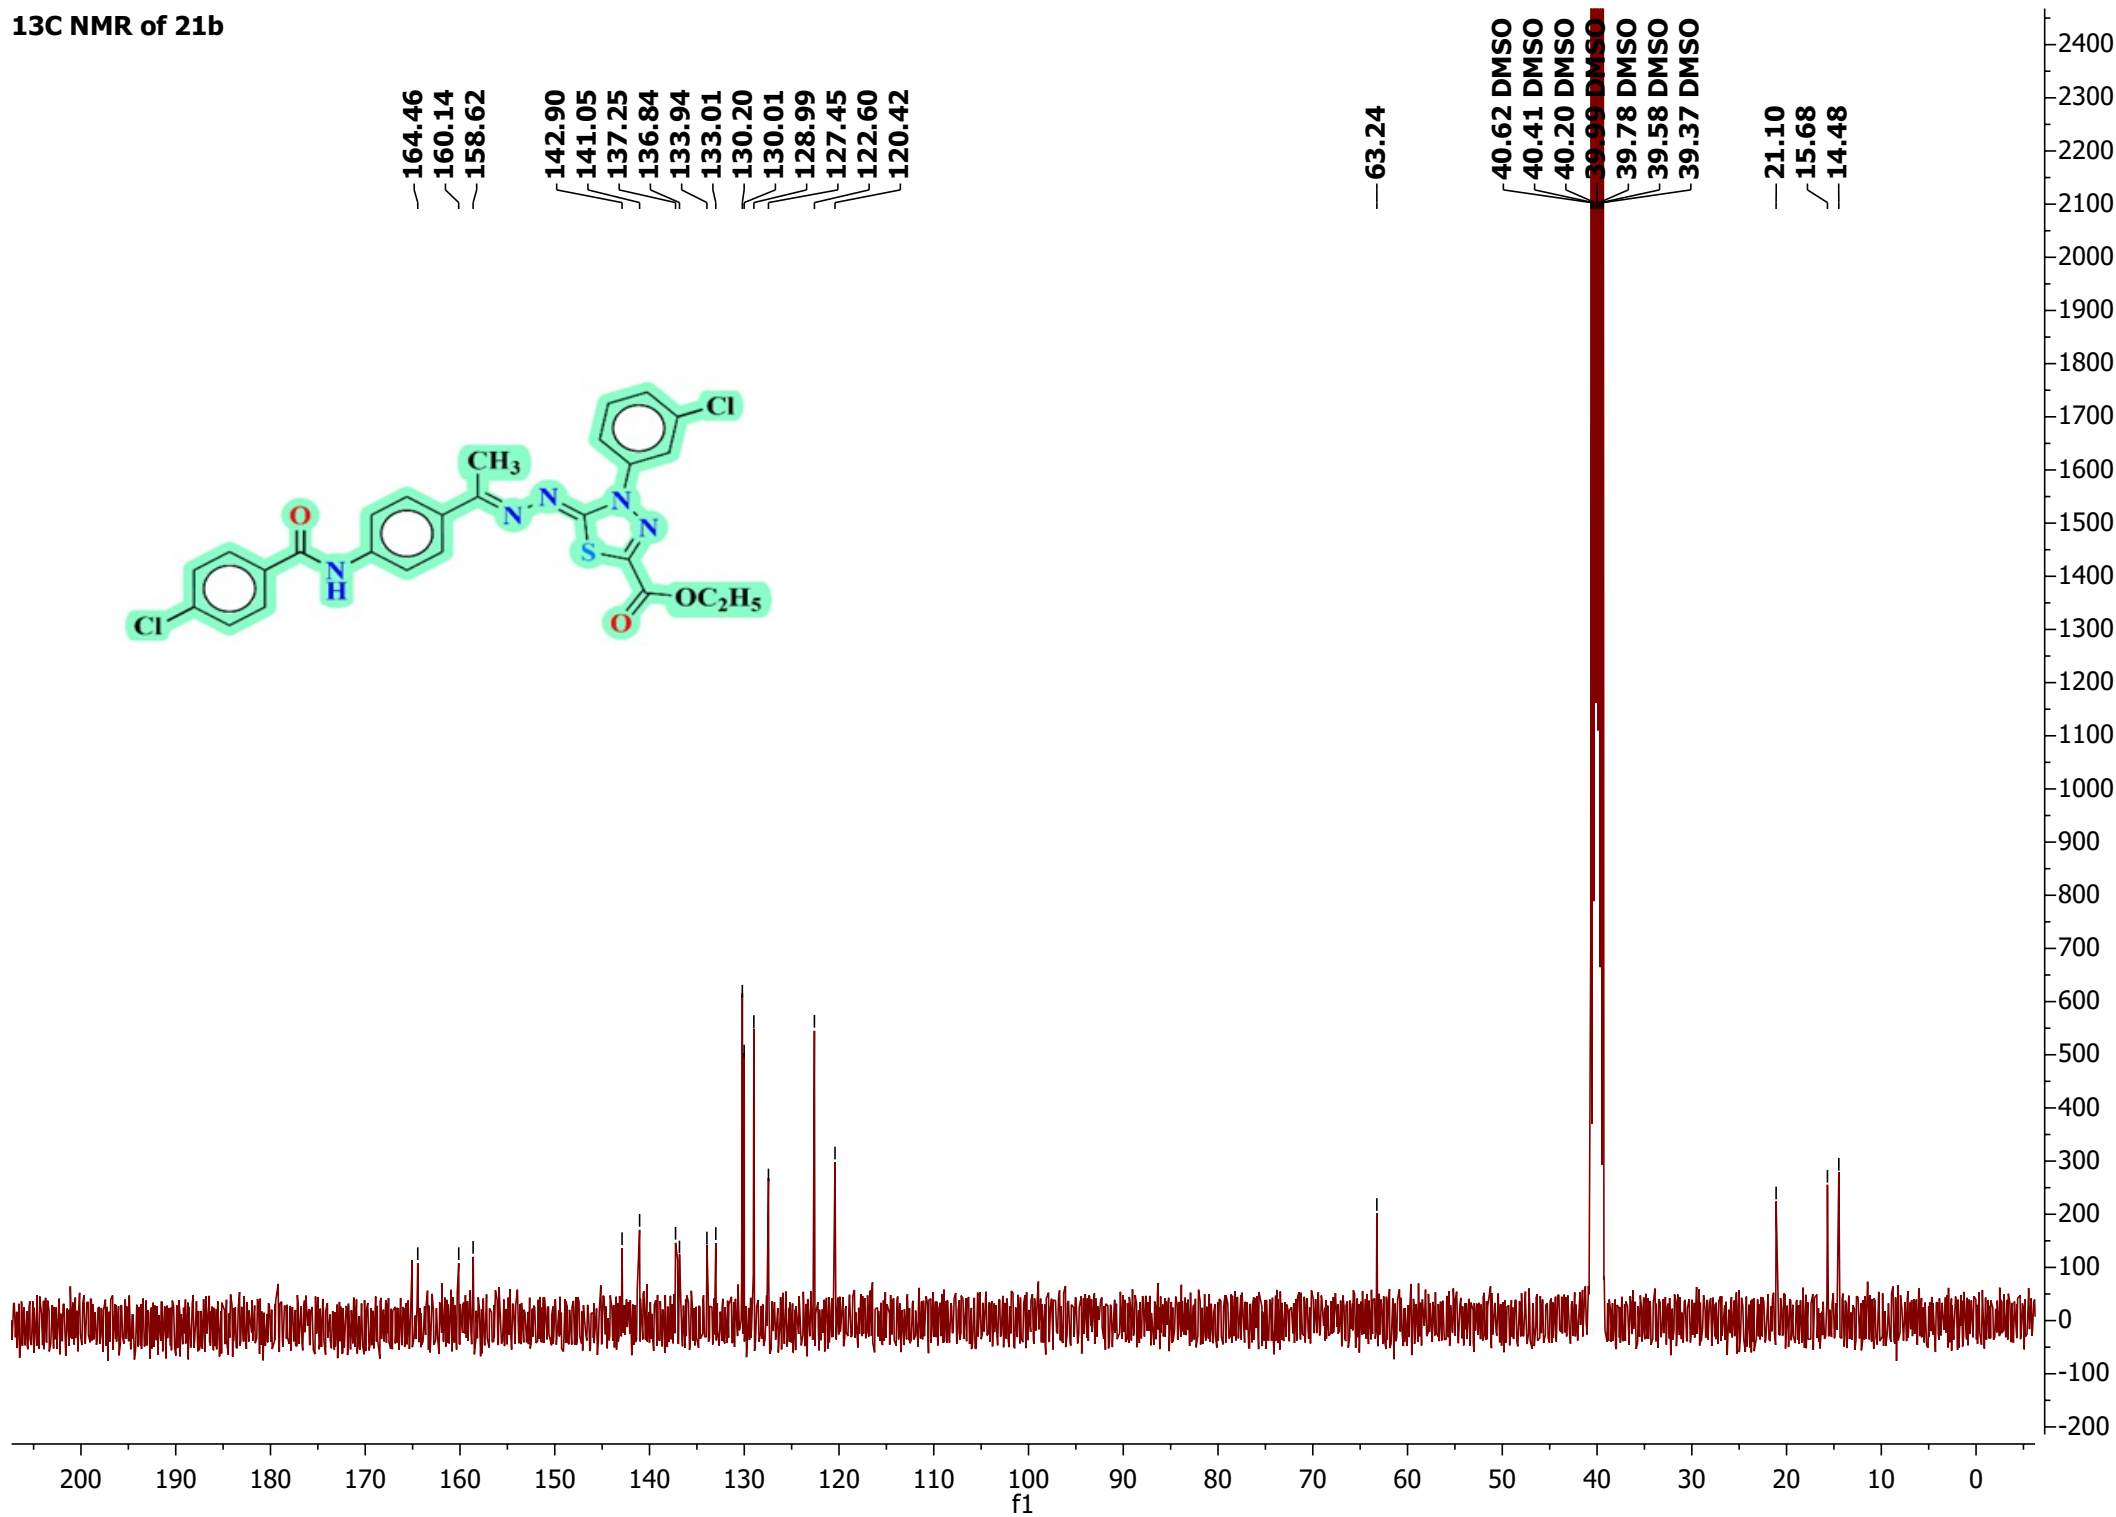

## Mass spec. of compound 21b

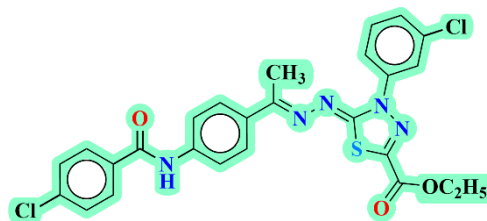

ibrahim-hassan-wc10 #25 RT: 0.44 AV: 1 SB: 22 0.22-0.37 , 0.28-0.47 NL: 3.53E3  
T: {0,0} + c EI Full ms [40.00-1000.00]

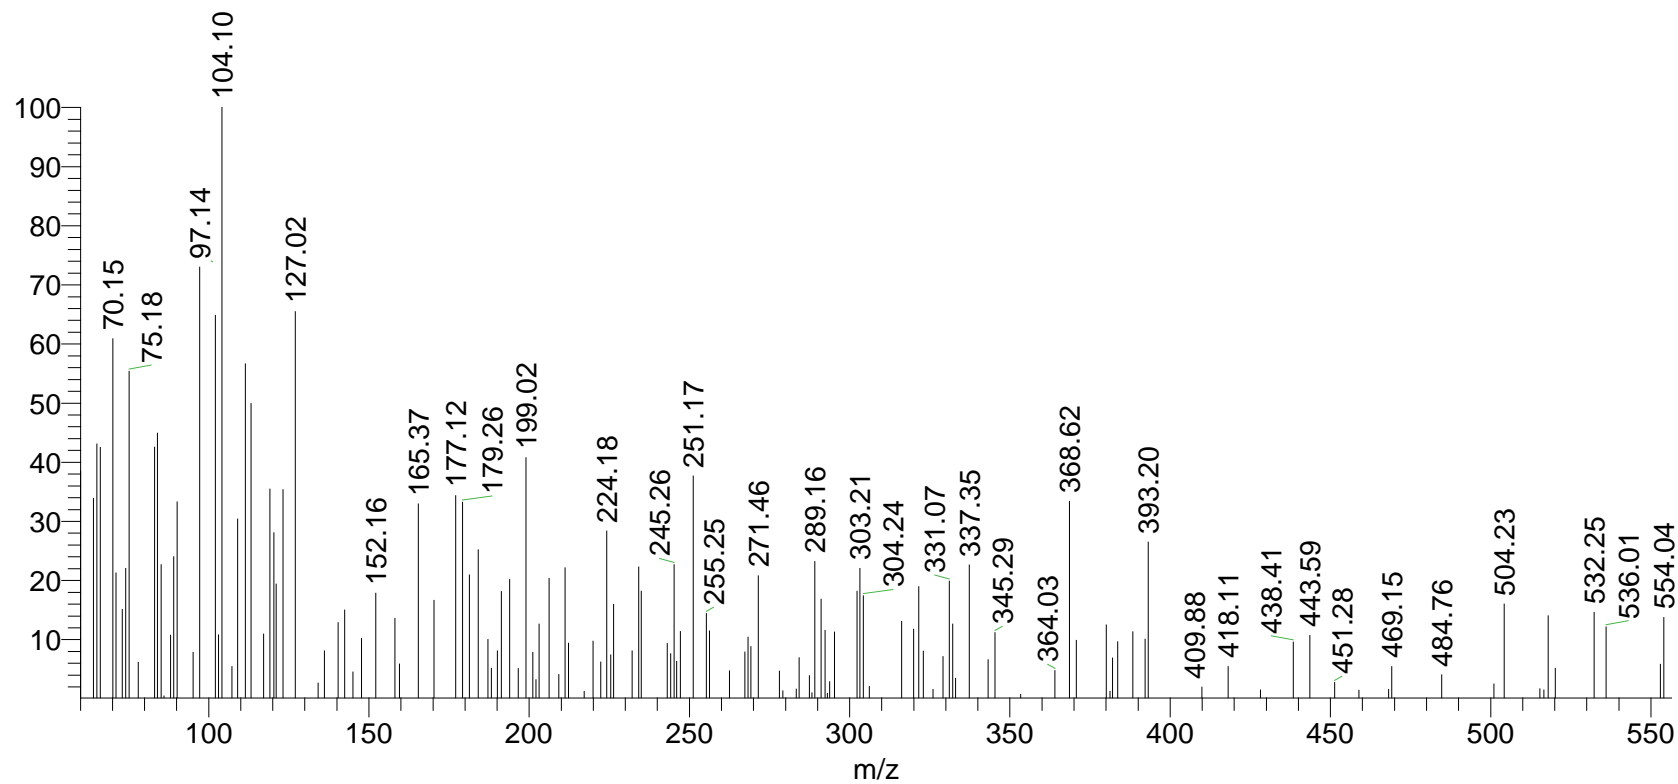

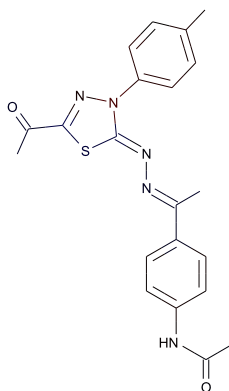

$C_{21}H_{21}N_5O_2S$

Molecular Weight: 407.48873

ALogP: 3.566

Rotatable Bonds: 5

Acceptors: 7

Donors: 1

## Model Prediction

Prediction: Non-Mutagen

Probability: 0.696

Enrichment: 1.25

Bayesian Score: -1.92

Mahalanobis Distance: 12

Mahalanobis Distance p-value: 0.000662

Prediction: Positive if the Bayesian score is above the estimated best cutoff value from minimizing the false positive and false negative rate.

Probability: The estimated probability that the sample is in the positive category. This assumes that the Bayesian score follows a normal distribution and is different from the prediction using a cutoff.

Enrichment: An estimate of enrichment, that is, the increased likelihood (versus random) of this sample being in the category.

Bayesian Score: The standard Laplacian-modified Bayesian score.

Mahalanobis Distance: The Mahalanobis distance (MD) is the distance to the center of the training data. The larger the MD, the less trustworthy the prediction.

Mahalanobis Distance p-value: The p-value gives the fraction of training data with an MD greater than or equal to the one for the given sample, assuming normally distributed data. The smaller the p-value, the less trustworthy the prediction. For highly non-normal X properties (e.g., fingerprints), the MD p-value is wildly inaccurate.

## Structural Similar Compounds

| Name               | MORICIZINE  | 139953-78-9                                      | 3-(4'-Acetylbenzylidenamino)-5H-1;2;3-triazin-[5;4b]indol-4-one |
|--------------------|-------------|--------------------------------------------------|-----------------------------------------------------------------|
| Structure          |             |                                                  |                                                                 |
| Actual Endpoint    | Non-Mutagen | Mutagen                                          | Mutagen                                                         |
| Predicted Endpoint | Non-Mutagen | Mutagen                                          | Mutagen                                                         |
| Distance           | 0.572       | 0.599                                            | 0.599                                                           |
| Reference          | PDR 1994    | Kazius et. al., J. Med. Chem. (2005) 48, 312-320 | Mutagenesis 7(1):37-39; 1992                                    |

## Model Applicability

Unknown features are fingerprint features in the query molecule, but not found or appearing too infrequently in the training set.

- All properties and OPS components are within expected ranges.

## Feature Contribution

### Top features for positive contribution

| Fingerprint | Bit/Smiles | Feature Structure        | Score | Mutagen in training set |
|-------------|------------|--------------------------|-------|-------------------------|
| SCFP_12     | 1325991669 | <br>[*]N1[*][*]C(=N1)[*] | 0.362 | 7 out of 8              |

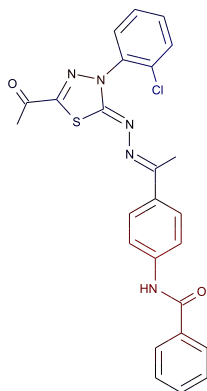

$C_{25}H_{20}ClN_5O_2S$

Molecular Weight: 489.97659

ALogP: 5.409

Rotatable Bonds: 6

Acceptors: 7

Donors: 1

## Model Prediction

Prediction: Non-Mutagen

Probability: 0.666

Enrichment: 1.19

Bayesian Score: -3.01

Mahalanobis Distance: 12.6

Mahalanobis Distance p-value: 4.07e-005

Prediction: Positive if the Bayesian score is above the estimated best cutoff value from minimizing the false positive and false negative rate.

Probability: The estimated probability that the sample is in the positive category. This assumes that the Bayesian score follows a normal distribution and is different from the prediction using a cutoff.

Enrichment: An estimate of enrichment, that is, the increased likelihood (versus random) of this sample being in the category.

Bayesian Score: The standard Laplacian-modified Bayesian score.

Mahalanobis Distance: The Mahalanobis distance (MD) is the distance to the center of the training data. The larger the MD, the less trustworthy the prediction.

Mahalanobis Distance p-value: The p-value gives the fraction of training data with an MD greater than or equal to the one for the given sample, assuming normally distributed data. The smaller the p-value, the less trustworthy the prediction. For highly non-normal X properties (e.g., fingerprints), the MD p-value is wildly inaccurate.

## Structural Similar Compounds

| Name               | 83621-06-1                                       | FLUTICASONE | 110004-69-8                                      |
|--------------------|--------------------------------------------------|-------------|--------------------------------------------------|
| Structure          |                                                  |             |                                                  |
| Actual Endpoint    | Non-Mutagen                                      | Non-Mutagen | Mutagen                                          |
| Predicted Endpoint | Non-Mutagen                                      | Non-Mutagen | Mutagen                                          |
| Distance           | 0.619                                            | 0.628       | 0.628                                            |
| Reference          | Kazius et. al., J. Med. Chem. (2005) 48, 312-320 | PDR 1994    | Kazius et. al., J. Med. Chem. (2005) 48, 312-320 |

## Model Applicability

Unknown features are fingerprint features in the query molecule, but not found or appearing too infrequently in the training set.

- All properties and OPS components are within expected ranges.

## Feature Contribution

### Top features for positive contribution

| Fingerprint | Bit/Smiles | Feature Structure                                                        | Score | Mutagen in training set |
|-------------|------------|--------------------------------------------------------------------------|-------|-------------------------|
| SCFP_12     | 555539852  | <br><chem>[*]:[cH]:[c](:[cH])C(=O)N[c]1:[cH]:[cH]:[*]:[cH]:[cH]:1</chem> | 0.447 | 22 out of 24            |

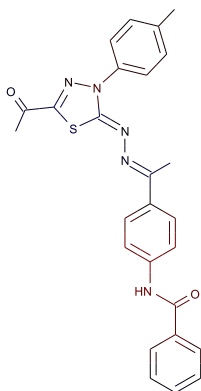

$C_{26}H_{23}N_5O_2S$

Molecular Weight: 469.55811

ALogP: 5.231

Rotatable Bonds: 6

Acceptors: 7

Donors: 1

## Model Prediction

**Prediction: Mutagen**

Probability: 0.731

Enrichment: 1.31

Bayesian Score: -0.416

Mahalanobis Distance: 12.4

Mahalanobis Distance p-value: 0.000145

Prediction: Positive if the Bayesian score is above the estimated best cutoff value from minimizing the false positive and false negative rate.

Probability: The estimated probability that the sample is in the positive category. This assumes that the Bayesian score follows a normal distribution and is different from the prediction using a cutoff.

Enrichment: An estimate of enrichment, that is, the increased likelihood (versus random) of this sample being in the category.

Bayesian Score: The standard Laplacian-modified Bayesian score.

Mahalanobis Distance: The Mahalanobis distance (MD) is the distance to the center of the training data. The larger the MD, the less trustworthy the prediction.

Mahalanobis Distance p-value: The p-value gives the fraction of training data with an MD greater than or equal to the one for the given sample, assuming normally distributed data. The smaller the p-value, the less trustworthy the prediction. For highly non-normal X properties (e.g., fingerprints), the MD p-value is wildly inaccurate.

## Structural Similar Compounds

| Name               | 110004-69-8                                      | 83621-06-1                                       | FLUTICASONE |
|--------------------|--------------------------------------------------|--------------------------------------------------|-------------|
| Structure          |                                                  |                                                  |             |
| Actual Endpoint    | Mutagen                                          | Non-Mutagen                                      | Non-Mutagen |
| Predicted Endpoint | Mutagen                                          | Non-Mutagen                                      | Non-Mutagen |
| Distance           | 0.610                                            | 0.619                                            | 0.620       |
| Reference          | Kazius et. al., J. Med. Chem. (2005) 48, 312-320 | Kazius et. al., J. Med. Chem. (2005) 48, 312-320 | PDR 1994    |

## Model Applicability

Unknown features are fingerprint features in the query molecule, but not found or appearing too infrequently in the training set.

1. All properties and OPS components are within expected ranges.

## Feature Contribution

### Top features for positive contribution

| Fingerprint | Bit/Smiles | Feature Structure                                                     | Score | Mutagen in training set |
|-------------|------------|-----------------------------------------------------------------------|-------|-------------------------|
| SCFP_12     | 555539852  | <br>[*]:[cH]:[c](:[cH])<br>])C(=O)N[c]1:[cH]:[c<br>H]:[*]:[cH]:[cH]:1 | 0.447 | 22 out of 24            |

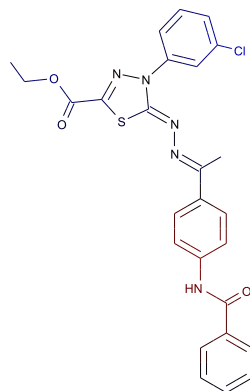

$C_{26}H_{22}ClN_5O_3S$

Molecular Weight: 520.00258

ALogP: 5.883

Rotatable Bonds: 8

Acceptors: 8

Donors: 1

## Model Prediction

Prediction: Non-Mutagen

Probability: 0.54

Enrichment: 0.967

Bayesian Score: -6.58

Mahalanobis Distance: 11.9

Mahalanobis Distance p-value: 0.00137

Prediction: Positive if the Bayesian score is above the estimated best cutoff value from minimizing the false positive and false negative rate.

Probability: The estimated probability that the sample is in the positive category. This assumes that the Bayesian score follows a normal distribution and is different from the prediction using a cutoff.

Enrichment: An estimate of enrichment, that is, the increased likelihood (versus random) of this sample being in the category.

Bayesian Score: The standard Laplacian-modified Bayesian score.

Mahalanobis Distance: The Mahalanobis distance (MD) is the distance to the center of the training data. The larger the MD, the less trustworthy the prediction.

Mahalanobis Distance p-value: The p-value gives the fraction of training data with an MD greater than or equal to the one for the given sample, assuming normally distributed data. The smaller the p-value, the less trustworthy the prediction. For highly non-normal X properties (e.g., fingerprints), the MD p-value is wildly inaccurate.

## Structural Similar Compounds

| Name               | 6471-49-4                                        | 3567-69-9                                                                                            | HYCANTHONE FUROATE |
|--------------------|--------------------------------------------------|------------------------------------------------------------------------------------------------------|--------------------|
| Structure          |                                                  |                                                                                                      |                    |
| Actual Endpoint    | Mutagen                                          | Mutagen                                                                                              | Mutagen            |
| Predicted Endpoint | Mutagen                                          | Non-Mutagen                                                                                          | Mutagen            |
| Distance           | 0.660                                            | 0.669                                                                                                | 0.671              |
| Reference          | Kazius et. al., J. Med. Chem. (2005) 48, 312-320 | Helma, C., Cramer, T., Kramer, S., and De Raedt, L., J. Chem. Inf. Comput. Sci., 2004, pp. 1402-1411 | EMIC               |

## Model Applicability

Unknown features are fingerprint features in the query molecule, but not found or appearing too infrequently in the training set.

- All properties and OPS components are within expected ranges.

## Feature Contribution

### Top features for positive contribution

| Fingerprint | Bit/Smiles | Feature Structure                                                | Score | Mutagen in training set |
|-------------|------------|------------------------------------------------------------------|-------|-------------------------|
| SCFP_12     | 555539852  | <br>[*]:[cH]:[c](:[cH]:[cH])C(=O)N[c]1:[cH]:[cH]:[*]:[cH]:[cH]:1 | 0.447 | 22 out of 24            |

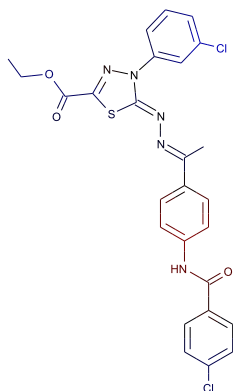

$C_{26}H_{21}Cl_2N_5O_3S$

Molecular Weight: 554.44763

ALogP: 6.547

Rotatable Bonds: 8

Acceptors: 8

Donors: 1

## Model Prediction

Prediction: Non-Mutagen

Probability: 0.495

Enrichment: 0.887

Bayesian Score: -7.62

Mahalanobis Distance: 11.9

Mahalanobis Distance p-value: 0.00101

Prediction: Positive if the Bayesian score is above the estimated best cutoff value from minimizing the false positive and false negative rate.

Probability: The estimated probability that the sample is in the positive category. This assumes that the Bayesian score follows a normal distribution and is different from the prediction using a cutoff.

Enrichment: An estimate of enrichment, that is, the increased likelihood (versus random) of this sample being in the category.

Bayesian Score: The standard Laplacian-modified Bayesian score.

Mahalanobis Distance: The Mahalanobis distance (MD) is the distance to the center of the training data. The larger the MD, the less trustworthy the prediction.

Mahalanobis Distance p-value: The p-value gives the fraction of training data with an MD greater than or equal to the one for the given sample, assuming normally distributed data. The smaller the p-value, the less trustworthy the prediction. For highly non-normal X properties (e.g., fingerprints), the MD p-value is wildly inaccurate.

## Structural Similar Compounds

| Name               | 26741-53-7                                       | 6358-85-6                                        | 6471-49-4                                        |
|--------------------|--------------------------------------------------|--------------------------------------------------|--------------------------------------------------|
| Structure          |                                                  |                                                  |                                                  |
| Actual Endpoint    | Non-Mutagen                                      | Non-Mutagen                                      | Mutagen                                          |
| Predicted Endpoint | Non-Mutagen                                      | Non-Mutagen                                      | Mutagen                                          |
| Distance           | 0.664                                            | 0.682                                            | 0.700                                            |
| Reference          | Kazius et. al., J. Med. Chem. (2005) 48, 312-320 | Kazius et. al., J. Med. Chem. (2005) 48, 312-320 | Kazius et. al., J. Med. Chem. (2005) 48, 312-320 |

## Model Applicability

Unknown features are fingerprint features in the query molecule, but not found or appearing too infrequently in the training set.

1. All properties and OPS components are within expected ranges.

## Feature Contribution

### Top features for positive contribution

| Fingerprint | Bit/Smiles | Feature Structure                                              | Score | Mutagen in training set |
|-------------|------------|----------------------------------------------------------------|-------|-------------------------|
| SCFP_12     | 555539852  | <br>[*]:[cH]:[c](:[cH]:[c]C(=O)N[c]1:[cH]:[cH]:[*]:[cH]:[cH]:1 | 0.447 | 22 out of 24            |

# Sorafenib

# TOPKAT\_Ames\_Mutagenicity

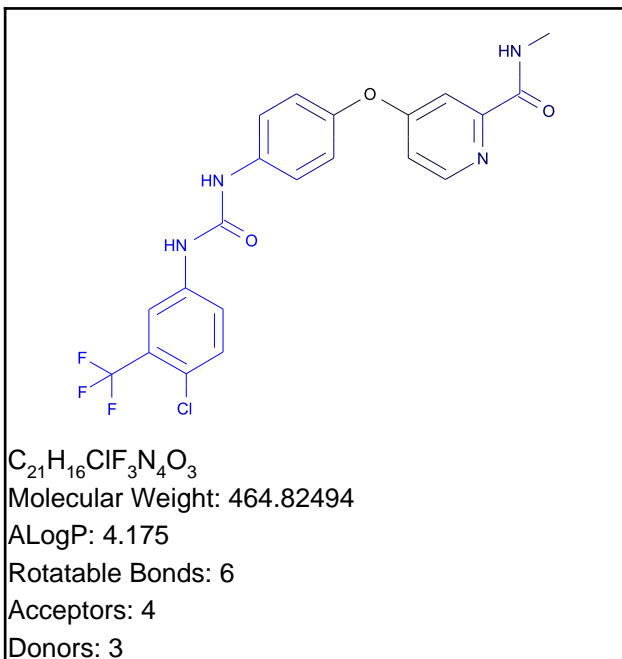

## Model Prediction

Prediction: Non-Mutagen

Probability: 0.0531

Enrichment: 0.0951

Bayesian Score: -19.7

Mahalanobis Distance: 13.1

Mahalanobis Distance p-value: 2.73e-006

Prediction: Positive if the Bayesian score is above the estimated best cutoff value from minimizing the false positive and false negative rate.

Probability: The estimated probability that the sample is in the positive category. This assumes that the Bayesian score follows a normal distribution and is different from the prediction using a cutoff.

Enrichment: An estimate of enrichment, that is, the increased likelihood (versus random) of this sample being in the category.  
 Bayesian Score: The standard Laplacian-modified Bayesian score.

Mahalanobis Distance: The Mahalanobis distance (MD) is the distance to the center of the training data. The larger the MD, the less trustworthy the prediction.

Mahalanobis Distance p-value: The p-value gives the fraction of training data with an MD greater than or equal to the one for the given sample, assuming normally distributed data. The smaller the p-value, the less trustworthy the prediction. For highly non-normal X properties (e.g., fingerprints), the MD p-value is wildly inaccurate.

## Structural Similar Compounds

| Name               | GLYBURIDE                                                                           | 38914-96-4                                                                          | 93957-54-1                                                                                                                                                          |
|--------------------|-------------------------------------------------------------------------------------|-------------------------------------------------------------------------------------|---------------------------------------------------------------------------------------------------------------------------------------------------------------------|
| Structure          | 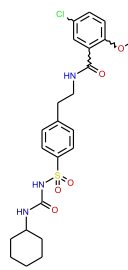 |  |                                                                                  |
| Actual Endpoint    | Non-Mutagen                                                                         | Mutagen                                                                             | Non-Mutagen                                                                                                                                                         |
| Predicted Endpoint | Non-Mutagen                                                                         | Mutagen                                                                             | Non-Mutagen                                                                                                                                                         |
| Distance           | 0.590                                                                               | 0.592                                                                               | 0.600                                                                                                                                                               |
| Reference          | PDR 1994                                                                            | Kazius et. al., J. Med. Chem. (2005) 48, 312-320                                    | US Environmental Protection Agency at <a href="http://www.epa.gov/NCCT/dsstox/sdf_isscan_external.html">http://www.epa.gov/NCCT/dsstox/sdf_isscan_external.html</a> |

## Model Applicability

Unknown features are fingerprint features in the query molecule, but not found or appearing too infrequently in the training set.

- All properties and OPS components are within expected ranges.

## Feature Contribution

### Top features for positive contribution

| Fingerprint | Bit/Smiles | Feature Structure                                                                                                                                                 | Score | Mutagen in training set |
|-------------|------------|-------------------------------------------------------------------------------------------------------------------------------------------------------------------|-------|-------------------------|
| SCFP_12     | 347281112  | 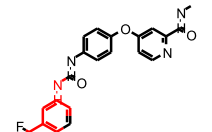<br><chem>[*]N(c1:c[h]:[*]:[c]([*]):[c]([*]:[c]([*]:1)C([*])([*])[*])</chem> | 0.337 | 18 out of 22            |



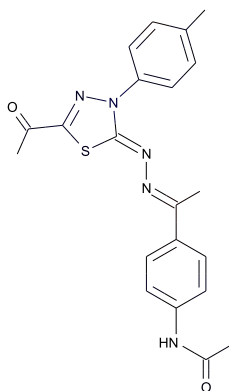

$C_{21}H_{21}N_5O_2S$

Molecular Weight: 407.48873

ALogP: 3.566

Rotatable Bonds: 5

Acceptors: 7

Donors: 1

## Model Prediction

Prediction: Non-Toxic

Probability: 0.517

Enrichment: 0.984

Bayesian Score: -0.815

Mahalanobis Distance: 10.9

Mahalanobis Distance p-value: 0.0016

Prediction: Positive if the Bayesian score is above the estimated best cutoff value from minimizing the false positive and false negative rate.

Probability: The estimated probability that the sample is in the positive category. This assumes that the Bayesian score follows a normal distribution and is different from the prediction using a cutoff.

Enrichment: An estimate of enrichment, that is, the increased likelihood (versus random) of this sample being in the category.

Bayesian Score: The standard Laplacian-modified Bayesian score.

Mahalanobis Distance: The Mahalanobis distance (MD) is the distance to the center of the training data. The larger the MD, the less trustworthy the prediction.

Mahalanobis Distance p-value: The p-value gives the fraction of training data with an MD greater than or equal to the one for the given sample, assuming normally distributed data. The smaller the p-value, the less trustworthy the prediction. For highly non-normal X properties (e.g., fingerprints), the MD p-value is wildly inaccurate.

## Structural Similar Compounds

| Name               | Bunazosin .HCl (Free base form) | Acemetacin                     | Prazosin .HCl (Free base form) |
|--------------------|---------------------------------|--------------------------------|--------------------------------|
| Structure          |                                 |                                |                                |
| Actual Endpoint    | Toxic                           | Non-Toxic                      | Toxic                          |
| Predicted Endpoint | Toxic                           | Non-Toxic                      | Toxic                          |
| Distance           | 0.601                           | 0.603                          | 0.615                          |
| Reference          | Kiso to Rinsho 17:914-924; 1983 | Oyo Yakuri 22(6):777-786; 1981 | Oyo Yakuri 17:57-62; 1979      |

## Model Applicability

Unknown features are fingerprint features in the query molecule, but not found or appearing too infrequently in the training set.

1. OPS PC14 out of range. Value: 4.7477. Training min, max, SD, explained variance: -3.5766, 3.955, 1.214, 0.0216.

## Feature Contribution

### Top features for positive contribution

| Fingerprint | Bit/Smiles | Feature Structure        | Score | Toxic in training set |
|-------------|------------|--------------------------|-------|-----------------------|
| SCFP_6      | 1626825020 | <br>[*]:[c](:[*])NC(=O)C | 0.271 | 1 out of 1            |

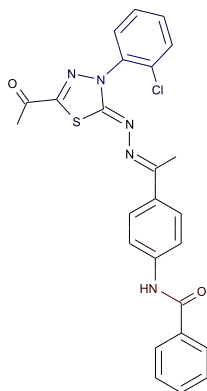

C<sub>25</sub>H<sub>20</sub>ClN<sub>5</sub>O<sub>2</sub>S

Molecular Weight: 489.97659

ALogP: 5.409

Rotatable Bonds: 6

Acceptors: 7

Donors: 1

## Model Prediction

Prediction: Non-Toxic

Probability: 0.494

Enrichment: 0.938

Bayesian Score: -1.48

Mahalanobis Distance: 12.3

Mahalanobis Distance p-value: 7.15e-006

Prediction: Positive if the Bayesian score is above the estimated best cutoff value from minimizing the false positive and false negative rate.

Probability: The estimated probability that the sample is in the positive category. This assumes that the Bayesian score follows a normal distribution and is different from the prediction using a cutoff.

Enrichment: An estimate of enrichment, that is, the increased likelihood (versus random) of this sample being in the category.

Bayesian Score: The standard Laplacian-modified Bayesian score.

Mahalanobis Distance: The Mahalanobis distance (MD) is the distance to the center of the training data. The larger the MD, the less trustworthy the prediction.

Mahalanobis Distance p-value: The p-value gives the fraction of training data with an MD greater than or equal to the one for the given sample, assuming normally distributed data. The smaller the p-value, the less trustworthy the prediction. For highly non-normal X properties (e.g., fingerprints), the MD p-value is wildly inaccurate.

## Structural Similar Compounds

| Name               | Acemetacin                     | Beclomethasone Dipropionate      | Estramustine Phosphate Disodium (Free acid form) |
|--------------------|--------------------------------|----------------------------------|--------------------------------------------------|
| Structure          |                                |                                  |                                                  |
| Actual Endpoint    | Non-Toxic                      | Toxic                            | Non-Toxic                                        |
| Predicted Endpoint | Non-Toxic                      | Toxic                            | Non-Toxic                                        |
| Distance           | 0.639                          | 0.662                            | 0.663                                            |
| Reference          | Oyo Yakuri 22(6):777-786; 1981 | Oyo Yakuri 18(6):1021-1038; 1979 | Oyo Yakuri 20(6):1219-1236; 1980                 |

## Model Applicability

Unknown features are fingerprint features in the query molecule, but not found or appearing too infrequently in the training set.

- OPS PC17 out of range. Value: 3.0225. Training min, max, SD, explained variance: -2.7025, 2.8536, 1.067, 0.0167.

## Feature Contribution

### Top features for positive contribution

| Fingerprint | Bit/Smiles | Feature Structure                       | Score | Toxic in training set |
|-------------|------------|-----------------------------------------|-------|-----------------------|
| SCFP_6      | 282594097  | <br>[*]NC(=O)[c]1:[cH]:[cH]:[cH]:[cH]:1 | 0.441 | 3 out of 3            |

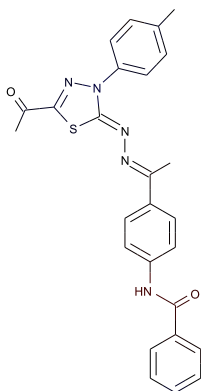

$C_{26}H_{23}N_5O_2S$

Molecular Weight: 469.55811

ALogP: 5.231

Rotatable Bonds: 6

Acceptors: 7

Donors: 1

## Model Prediction

Prediction: Non-Toxic

Probability: 0.526

Enrichment: 0.999

Bayesian Score: -0.59

Mahalanobis Distance: 12.1

Mahalanobis Distance p-value: 1.77e-005

Prediction: Positive if the Bayesian score is above the estimated best cutoff value from minimizing the false positive and false negative rate.

Probability: The estimated probability that the sample is in the positive category. This assumes that the Bayesian score follows a normal distribution and is different from the prediction using a cutoff.

Enrichment: An estimate of enrichment, that is, the increased likelihood (versus random) of this sample being in the category.

Bayesian Score: The standard Laplacian-modified Bayesian score.

Mahalanobis Distance: The Mahalanobis distance (MD) is the distance to the center of the training data. The larger the MD, the less trustworthy the prediction.

Mahalanobis Distance p-value: The p-value gives the fraction of training data with an MD greater than or equal to the one for the given sample, assuming normally distributed data. The smaller the p-value, the less trustworthy the prediction. For highly non-normal X properties (e.g., fingerprints), the MD p-value is wildly inaccurate.

## Structural Similar Compounds

| Name               | Acemetacin                     | Beclomethasone Dipropionate      | Estramustine Phosphate Disodium (Free acid form) |
|--------------------|--------------------------------|----------------------------------|--------------------------------------------------|
| Structure          |                                |                                  |                                                  |
| Actual Endpoint    | Non-Toxic                      | Toxic                            | Non-Toxic                                        |
| Predicted Endpoint | Non-Toxic                      | Toxic                            | Non-Toxic                                        |
| Distance           | 0.623                          | 0.663                            | 0.665                                            |
| Reference          | Oyo Yakuri 22(6):777-786; 1981 | Oyo Yakuri 18(6):1021-1038; 1979 | Oyo Yakuri 20(6):1219-1236; 1980                 |

## Model Applicability

Unknown features are fingerprint features in the query molecule, but not found or appearing too infrequently in the training set.

- All properties and OPS components are within expected ranges.

## Feature Contribution

### Top features for positive contribution

| Fingerprint | Bit/Smiles | Feature Structure                                    | Score | Toxic in training set |
|-------------|------------|------------------------------------------------------|-------|-----------------------|
| SCFP_6      | 282594097  | <br><chem>[*]NC(=O)[c]1:[cH]:[cH]:[cH]:[cH]:1</chem> | 0.441 | 3 out of 3            |

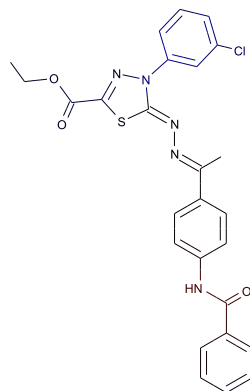

C<sub>26</sub>H<sub>22</sub>ClN<sub>5</sub>O<sub>3</sub>S

Molecular Weight: 520.00258

ALogP: 5.883

Rotatable Bonds: 8

Acceptors: 8

Donors: 1

## Model Prediction

Prediction: Non-Toxic

Probability: 0.437

Enrichment: 0.832

Bayesian Score: -3.16

Mahalanobis Distance: 13.5

Mahalanobis Distance p-value: 3.92e-008

Prediction: Positive if the Bayesian score is above the estimated best cutoff value from minimizing the false positive and false negative rate.

Probability: The estimated probability that the sample is in the positive category. This assumes that the Bayesian score follows a normal distribution and is different from the prediction using a cutoff.

Enrichment: An estimate of enrichment, that is, the increased likelihood (versus random) of this sample being in the category.

Bayesian Score: The standard Laplacian-modified Bayesian score.

Mahalanobis Distance: The Mahalanobis distance (MD) is the distance to the center of the training data. The larger the MD, the less trustworthy the prediction.

Mahalanobis Distance p-value: The p-value gives the fraction of training data with an MD greater than or equal to the one for the given sample, assuming normally distributed data. The smaller the p-value, the less trustworthy the prediction. For highly non-normal X properties (e.g., fingerprints), the MD p-value is wildly inaccurate.

## Structural Similar Compounds

| Name               | Beclomethasone Dipropionate      | Estramustine Phosphate Disodium (Free acid form) | Brovanexine .HCl (Free base form)     |
|--------------------|----------------------------------|--------------------------------------------------|---------------------------------------|
| Structure          |                                  |                                                  |                                       |
| Actual Endpoint    | Toxic                            | Non-Toxic                                        | Toxic                                 |
| Predicted Endpoint | Toxic                            | Non-Toxic                                        | Toxic                                 |
| Distance           | 0.659                            | 0.660                                            | 0.681                                 |
| Reference          | Oyo Yakuri 18(6):1021-1038; 1979 | Oyo Yakuri 20(6):1219-1236; 1980                 | Kiso to Rinsho 16(13):7179-7195; 1982 |

## Model Applicability

Unknown features are fingerprint features in the query molecule, but not found or appearing too infrequently in the training set.

1. All properties and OPS components are within expected ranges.

## Feature Contribution

### Top features for positive contribution

| Fingerprint | Bit/Smiles | Feature Structure                                    | Score | Toxic in training set |
|-------------|------------|------------------------------------------------------|-------|-----------------------|
| SCFP_6      | 282594097  | <br><chem>[*]NC(=O)[c]1:[cH]:[cH]:[cH]:[cH]:1</chem> | 0.441 | 3 out of 3            |

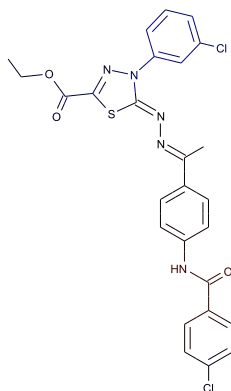

$C_{26}H_{21}Cl_2N_5O_3S$

Molecular Weight: 554.44763

ALogP: 6.547

Rotatable Bonds: 8

Acceptors: 8

Donors: 1

## Model Prediction

Prediction: Non-Toxic

Probability: 0.442

Enrichment: 0.84

Bayesian Score: -3.03

Mahalanobis Distance: 12.4

Mahalanobis Distance p-value: 4.85e-006

Prediction: Positive if the Bayesian score is above the estimated best cutoff value from minimizing the false positive and false negative rate.

Probability: The estimated probability that the sample is in the positive category. This assumes that the Bayesian score follows a normal distribution and is different from the prediction using a cutoff.

Enrichment: An estimate of enrichment, that is, the increased likelihood (versus random) of this sample being in the category.

Bayesian Score: The standard Laplacian-modified Bayesian score.

Mahalanobis Distance: The Mahalanobis distance (MD) is the distance to the center of the training data. The larger the MD, the less trustworthy the prediction.

Mahalanobis Distance p-value: The p-value gives the fraction of training data with an MD greater than or equal to the one for the given sample, assuming normally distributed data. The smaller the p-value, the less trustworthy the prediction. For highly non-normal X properties (e.g., fingerprints), the MD p-value is wildly inaccurate.

## Structural Similar Compounds

| Name               | Brovanexine .HCl (Free base form)     | Estramustine Phosphate Disodium (Free acid form) | Beclomethasone Dipropionate      |
|--------------------|---------------------------------------|--------------------------------------------------|----------------------------------|
| Structure          |                                       |                                                  |                                  |
| Actual Endpoint    | Toxic                                 | Non-Toxic                                        | Toxic                            |
| Predicted Endpoint | Toxic                                 | Non-Toxic                                        | Toxic                            |
| Distance           | 0.677                                 | 0.688                                            | 0.716                            |
| Reference          | Kiso to Rinsho 16(13):7179-7195; 1982 | Oyo Yakuri 20(6):1219-1236; 1980                 | Oyo Yakuri 18(6):1021-1038; 1979 |

## Model Applicability

Unknown features are fingerprint features in the query molecule, but not found or appearing too infrequently in the training set.

1. All properties and OPS components are within expected ranges.

## Feature Contribution

### Top features for positive contribution

| Fingerprint | Bit/Smiles | Feature Structure                                    | Score | Toxic in training set |
|-------------|------------|------------------------------------------------------|-------|-----------------------|
| SCFP_6      | 282594097  | <br><chem>[*]NC(=O)[c]1:[cH]:[cH]:[cH]:[cH]:1</chem> | 0.441 | 3 out of 3            |

# Sorafenib

# TOPKAT\_Developmental\_Toxicity\_Potential

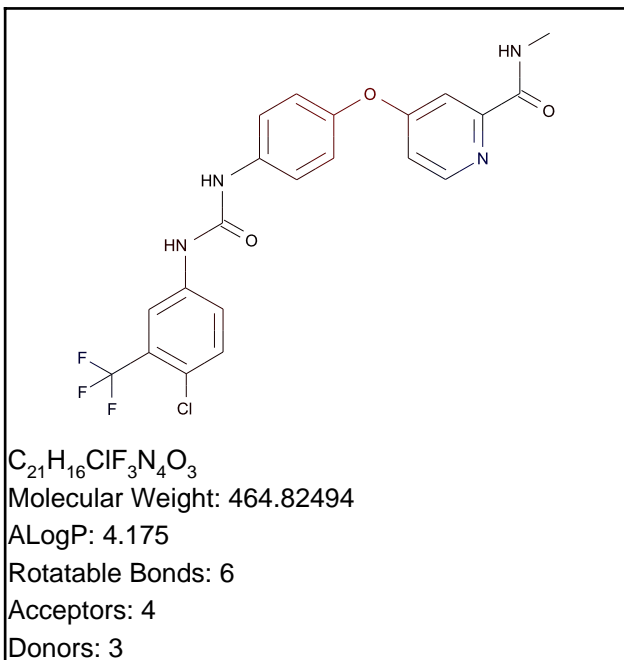

## Model Prediction

Prediction: Toxic

Probability: 0.592

Enrichment: 1.13

Bayesian Score: 1.15

Mahalanobis Distance: 12.6

Mahalanobis Distance p-value: 2.07e-006

Prediction: Positive if the Bayesian score is above the estimated best cutoff value from minimizing the false positive and false negative rate.

Probability: The estimated probability that the sample is in the positive category. This assumes that the Bayesian score follows a normal distribution and is different from the prediction using a cutoff.

Enrichment: An estimate of enrichment, that is, the increased likelihood (versus random) of this sample being in the category.

Bayesian Score: The standard Laplacian-modified Bayesian score.

Mahalanobis Distance: The Mahalanobis distance (MD) is the distance to the center of the training data. The larger the MD, the less trustworthy the prediction.

Mahalanobis Distance p-value: The p-value gives the fraction of training data with an MD greater than or equal to the one for the given sample, assuming normally distributed data. The smaller the p-value, the less trustworthy the prediction. For highly non-normal X properties (e.g., fingerprints), the MD p-value is wildly inaccurate.

## Structural Similar Compounds

| Name               | Chenodioli                                                                          | Amsacrine                                                                           | Ochratoxin a                                                                        |
|--------------------|-------------------------------------------------------------------------------------|-------------------------------------------------------------------------------------|-------------------------------------------------------------------------------------|
| Structure          | 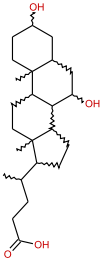 |  |  |
| Actual Endpoint    | Toxic                                                                               | Toxic                                                                               | Toxic                                                                               |
| Predicted Endpoint | Toxic                                                                               | Toxic                                                                               | Toxic                                                                               |
| Distance           | 0.631                                                                               | 0.637                                                                               | 0.644                                                                               |
| Reference          | Arch Int Pharm 246:149-158; 1980                                                    | Fundam Appl Toxicol 7(2):214-20; 1986                                               | Toxicol Appl Pharmacol 37(2):331-8; 1976                                            |

## Model Applicability

Unknown features are fingerprint features in the query molecule, but not found or appearing too infrequently in the training set.

1. All properties and OPS components are within expected ranges.

## Feature Contribution

### Top features for positive contribution

| Fingerprint | Bit/Smiles | Feature Structure                                                                                                                            | Score | Toxic in training set |
|-------------|------------|----------------------------------------------------------------------------------------------------------------------------------------------|-------|-----------------------|
| SCFP_6      | 1559190850 | 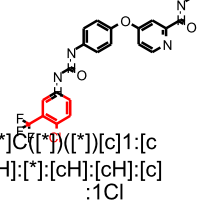<br>[*]C( [* ]) ( [* ]) [c]1:[c]H:[*]:[cH]:[cH]:[c]:1Cl | 0.441 | 3 out of 3            |

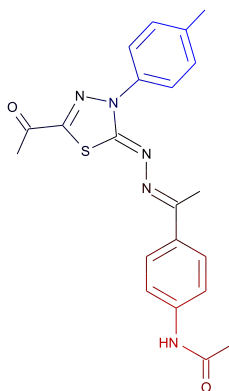

$C_{21}H_{21}N_5O_2S$

Molecular Weight: 407.48873

ALogP: 3.566

Rotatable Bonds: 5

Acceptors: 7

Donors: 1

## Model Prediction

Prediction: Non-Carcinogen

Probability: 0.208

Enrichment: 0.649

Bayesian Score: -4.72

Mahalanobis Distance: 11.2

Mahalanobis Distance p-value: 0.0666

Prediction: Positive if the Bayesian score is above the estimated best cutoff value from minimizing the false positive and false negative rate.

Probability: The estimated probability that the sample is in the positive category. This assumes that the Bayesian score follows a normal distribution and is different from the prediction using a cutoff.

Enrichment: An estimate of enrichment, that is, the increased likelihood (versus random) of this sample being in the category.

Bayesian Score: The standard Laplacian-modified Bayesian score.

Mahalanobis Distance: The Mahalanobis distance (MD) is the distance to the center of the training data. The larger the MD, the less trustworthy the prediction.

Mahalanobis Distance p-value: The p-value gives the fraction of training data with an MD greater than or equal to the one for the given sample, assuming normally distributed data. The smaller the p-value, the less trustworthy the prediction. For highly non-normal X properties (e.g., fingerprints), the MD p-value is wildly inaccurate.

## Structural Similar Compounds

| Name               | Moricizine                                                          | Isradipine                                                          | Nisoldipine                                                         |
|--------------------|---------------------------------------------------------------------|---------------------------------------------------------------------|---------------------------------------------------------------------|
| Structure          |                                                                     |                                                                     |                                                                     |
| Actual Endpoint    | Carcinogen                                                          | Non-Carcinogen                                                      | Non-Carcinogen                                                      |
| Predicted Endpoint | Carcinogen                                                          | Non-Carcinogen                                                      | Non-Carcinogen                                                      |
| Distance           | 0.575                                                               | 0.618                                                               | 0.633                                                               |
| Reference          | US FDA (Centre for Drug Eval.& Res./Off. Testing & Res.) Sept. 1997 | US FDA (Centre for Drug Eval.& Res./Off. Testing & Res.) Sept. 1997 | US FDA (Centre for Drug Eval.& Res./Off. Testing & Res.) Sept. 1997 |

## Model Applicability

Unknown features are fingerprint features in the query molecule, but not found or appearing too infrequently in the training set.

1. All properties and OPS components are within expected ranges.
2. Unknown ECFP\_2 feature: 128986386: [\*]N=C(/C)\[c](:[\*]):[\*]
3. Unknown ECFP\_2 feature: 562081661: [\*]C(=NN=[\*])[\*]
4. Unknown ECFP\_2 feature: -819426257: [\*]C(=NN=[\*])[\*]
5. Unknown ECFP\_2 feature: 189949281: [\*]N=C\1/S[\*]=[\*]N1[\*]
6. Unknown ECFP\_2 feature: -934225701: [\*]C(=[\*])C1=N[\*][\*]S1
7. Unknown ECFP\_2 feature: -1110911409: [\*]=C1[\*][\*]=NN1[c](:[\*]):[\*]

## Feature Contribution

### Top features for positive contribution

| Fingerprint | Bit/Smiles | Feature Structure | Score | Carcinogen in training set |
|-------------|------------|-------------------|-------|----------------------------|
|             |            |                   |       |                            |

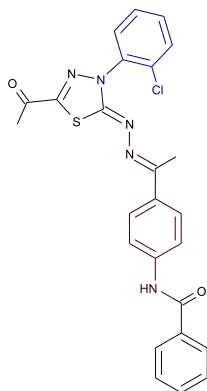

$C_{25}H_{20}ClN_5O_2S$

Molecular Weight: 489.97659

ALogP: 5.409

Rotatable Bonds: 6

Acceptors: 7

Donors: 1

## Model Prediction

Prediction: Non-Carcinogen

Probability: 0.206

Enrichment: 0.642

Bayesian Score: -5.37

Mahalanobis Distance: 13.7

Mahalanobis Distance p-value: 4e-005

Prediction: Positive if the Bayesian score is above the estimated best cutoff value from minimizing the false positive and false negative rate.

Probability: The estimated probability that the sample is in the positive category. This assumes that the Bayesian score follows a normal distribution and is different from the prediction using a cutoff.

Enrichment: An estimate of enrichment, that is, the increased likelihood (versus random) of this sample being in the category.

Bayesian Score: The standard Laplacian-modified Bayesian score.

Mahalanobis Distance: The Mahalanobis distance (MD) is the distance to the center of the training data. The larger the MD, the less trustworthy the prediction.

Mahalanobis Distance p-value: The p-value gives the fraction of training data with an MD greater than or equal to the one for the given sample, assuming normally distributed data. The smaller the p-value, the less trustworthy the prediction. For highly non-normal X properties (e.g., fingerprints), the MD p-value is wildly inaccurate.

## Structural Similar Compounds

| Name               | Fluticasone                                                         | Moricizine                                                          | Emetine                                                             |
|--------------------|---------------------------------------------------------------------|---------------------------------------------------------------------|---------------------------------------------------------------------|
| Structure          |                                                                     |                                                                     |                                                                     |
| Actual Endpoint    | Non-Carcinogen                                                      | Carcinogen                                                          | Non-Carcinogen                                                      |
| Predicted Endpoint | Non-Carcinogen                                                      | Carcinogen                                                          | Non-Carcinogen                                                      |
| Distance           | 0.632                                                               | 0.686                                                               | 0.692                                                               |
| Reference          | US FDA (Centre for Drug Eval.& Res./Off. Testing & Res.) Sept. 1997 | US FDA (Centre for Drug Eval.& Res./Off. Testing & Res.) Sept. 1997 | US FDA (Centre for Drug Eval.& Res./Off. Testing & Res.) Sept. 1997 |

## Model Applicability

Unknown features are fingerprint features in the query molecule, but not found or appearing too infrequently in the training set.

- OPS PC28 out of range. Value: 3.464. Training min, max, SD, explained variance: -2.8298, 3.1935, 1.043, 0.0111.
- Unknown ECFP\_2 feature: 128986386: [\*]N=C(/C)[c](:[\*]):[\*]
- Unknown ECFP\_2 feature: 562081661: [\*]C(=NN=[\*])[\*]
- Unknown ECFP\_2 feature: -819426257: [\*]C(=NN=[\*])[\*]
- Unknown ECFP\_2 feature: 189949281: [\*]N=C\1/S[\*]=[\*]N1[\*]
- Unknown ECFP\_2 feature: -934225701: [\*]C(=[\*])C1=N[\*][\*]S1
- Unknown ECFP\_2 feature: -1110911409: [\*]=C1[\*][\*]=NN1[c](:[\*]):[\*]

## Feature Contribution

### Top features for positive contribution

| Fingerprint | Bit/Smiles | Feature Structure | Score | Carcinogen in training set |
|-------------|------------|-------------------|-------|----------------------------|
|             |            |                   |       |                            |



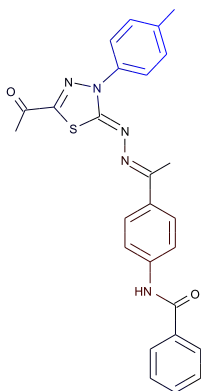

$C_{26}H_{23}N_5O_2S$

Molecular Weight: 469.55811

ALogP: 5.231

Rotatable Bonds: 6

Acceptors: 7

Donors: 1

## Model Prediction

Prediction: Non-Carcinogen

Probability: 0.206

Enrichment: 0.644

Bayesian Score: -7.46

Mahalanobis Distance: 12.4

Mahalanobis Distance p-value: 0.00322

Prediction: Positive if the Bayesian score is above the estimated best cutoff value from minimizing the false positive and false negative rate.

Probability: The estimated probability that the sample is in the positive category. This assumes that the Bayesian score follows a normal distribution and is different from the prediction using a cutoff.

Enrichment: An estimate of enrichment, that is, the increased likelihood (versus random) of this sample being in the category.

Bayesian Score: The standard Laplacian-modified Bayesian score.

Mahalanobis Distance: The Mahalanobis distance (MD) is the distance to the center of the training data. The larger the MD, the less trustworthy the prediction.

Mahalanobis Distance p-value: The p-value gives the fraction of training data with an MD greater than or equal to the one for the given sample, assuming normally distributed data. The smaller the p-value, the less trustworthy the prediction. For highly non-normal X properties (e.g., fingerprints), the MD p-value is wildly inaccurate.

## Structural Similar Compounds

| Name               | Fluticasone                                                         | Moricizine                                                          | Emetine                                                             |
|--------------------|---------------------------------------------------------------------|---------------------------------------------------------------------|---------------------------------------------------------------------|
| Structure          |                                                                     |                                                                     |                                                                     |
| Actual Endpoint    | Non-Carcinogen                                                      | Carcinogen                                                          | Non-Carcinogen                                                      |
| Predicted Endpoint | Non-Carcinogen                                                      | Carcinogen                                                          | Non-Carcinogen                                                      |
| Distance           | 0.628                                                               | 0.670                                                               | 0.689                                                               |
| Reference          | US FDA (Centre for Drug Eval.& Res./Off. Testing & Res.) Sept. 1997 | US FDA (Centre for Drug Eval.& Res./Off. Testing & Res.) Sept. 1997 | US FDA (Centre for Drug Eval.& Res./Off. Testing & Res.) Sept. 1997 |

## Model Applicability

Unknown features are fingerprint features in the query molecule, but not found or appearing too infrequently in the training set.

1. All properties and OPS components are within expected ranges.
2. Unknown ECFP\_2 feature: 128986386: [\*]N=C(/C)\[c](:[\*]):[\*]
3. Unknown ECFP\_2 feature: 562081661: [\*]C(=NN=[\*])[\*]
4. Unknown ECFP\_2 feature: -819426257: [\*]C(=NN=[\*])[\*]
5. Unknown ECFP\_2 feature: 189949281: [\*]N=C\1/S[\*]=[\*]N1[\*]
6. Unknown ECFP\_2 feature: -934225701: [\*]C(=[\*])C1=N[\*][\*]S1
7. Unknown ECFP\_2 feature: -1110911409: [\*]=C1[\*][\*]=NN1[c](:[\*]):[\*]

## Feature Contribution

### Top features for positive contribution

| Fingerprint | Bit/Smiles | Feature Structure | Score | Carcinogen in training set |
|-------------|------------|-------------------|-------|----------------------------|
|             |            |                   |       |                            |

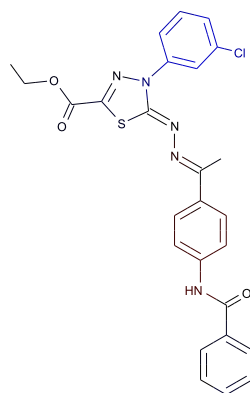

$C_{26}H_{22}ClN_5O_3S$

Molecular Weight: 520.00258

ALogP: 5.883

Rotatable Bonds: 8

Acceptors: 8

Donors: 1

## Model Prediction

Prediction: Non-Carcinogen

Probability: 0.205

Enrichment: 0.64

Bayesian Score: -6.85

Mahalanobis Distance: 20

Mahalanobis Distance p-value: 4.36e-018

Prediction: Positive if the Bayesian score is above the estimated best cutoff value from minimizing the false positive and false negative rate.

Probability: The estimated probability that the sample is in the positive category. This assumes that the Bayesian score follows a normal distribution and is different from the prediction using a cutoff.

Enrichment: An estimate of enrichment, that is, the increased likelihood (versus random) of this sample being in the category.

Bayesian Score: The standard Laplacian-modified Bayesian score.

Mahalanobis Distance: The Mahalanobis distance (MD) is the distance to the center of the training data. The larger the MD, the less trustworthy the prediction.

Mahalanobis Distance p-value: The p-value gives the fraction of training data with an MD greater than or equal to the one for the given sample, assuming normally distributed data. The smaller the p-value, the less trustworthy the prediction. For highly non-normal X properties (e.g., fingerprints), the MD p-value is wildly inaccurate.

## Structural Similar Compounds

| Name               | Reserpine                                                           | Bitolterol                                                          | Nicardipine                                                         |
|--------------------|---------------------------------------------------------------------|---------------------------------------------------------------------|---------------------------------------------------------------------|
| Structure          |                                                                     |                                                                     |                                                                     |
| Actual Endpoint    | Carcinogen                                                          | Non-Carcinogen                                                      | Non-Carcinogen                                                      |
| Predicted Endpoint | Carcinogen                                                          | Non-Carcinogen                                                      | Non-Carcinogen                                                      |
| Distance           | 0.693                                                               | 0.733                                                               | 0.740                                                               |
| Reference          | US FDA (Centre for Drug Eval.& Res./Off. Testing & Res.) Sept. 1997 | US FDA (Centre for Drug Eval.& Res./Off. Testing & Res.) Sept. 1997 | US FDA (Centre for Drug Eval.& Res./Off. Testing & Res.) Sept. 1997 |

## Model Applicability

Unknown features are fingerprint features in the query molecule, but not found or appearing too infrequently in the training set.

- OPS PC8 out of range. Value: -4.0148. Training min, max, SD, explained variance: -3.693, 7.8709, 1.782, 0.0323.
- Unknown ECFP\_2 feature: 128986386: [\*]N=C(/C)\[c](:[\*]):[\*]
- Unknown ECFP\_2 feature: 562081661: [\*]C(=NN=[\*])[\*]
- Unknown ECFP\_2 feature: -819426257: [\*]C(=NN=[\*])[\*]
- Unknown ECFP\_2 feature: 189949281: [\*]N=C\1/S[\*]=[\*]N1[\*]
- Unknown ECFP\_2 feature: -934225701: [\*]C(=[\*])C1=N[\*][\*]S1
- Unknown ECFP\_2 feature: -1110911409: [\*]=C1[\*][\*]=NN1[c](:[\*]):[\*]

## Feature Contribution

### Top features for positive contribution

| Fingerprint | Bit/Smiles | Feature Structure | Score | Carcinogen in training set |
|-------------|------------|-------------------|-------|----------------------------|
|             |            |                   |       |                            |

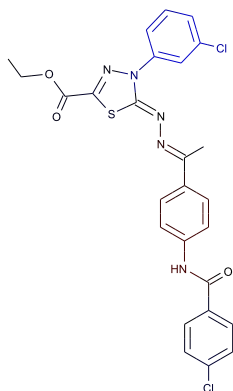

$C_{26}H_{21}Cl_2N_5O_3S$

Molecular Weight: 554.44763

ALogP: 6.547

Rotatable Bonds: 8

Acceptors: 8

Donors: 1

## Model Prediction

Prediction: Non-Carcinogen

Probability: 0.206

Enrichment: 0.643

Bayesian Score: -7.32

Mahalanobis Distance: 14.2

Mahalanobis Distance p-value: 5.77e-006

Prediction: Positive if the Bayesian score is above the estimated best cutoff value from minimizing the false positive and false negative rate.

Probability: The estimated probability that the sample is in the positive category. This assumes that the Bayesian score follows a normal distribution and is different from the prediction using a cutoff.

Enrichment: An estimate of enrichment, that is, the increased likelihood (versus random) of this sample being in the category.

Bayesian Score: The standard Laplacian-modified Bayesian score.

Mahalanobis Distance: The Mahalanobis distance (MD) is the distance to the center of the training data. The larger the MD, the less trustworthy the prediction.

Mahalanobis Distance p-value: The p-value gives the fraction of training data with an MD greater than or equal to the one for the given sample, assuming normally distributed data. The smaller the p-value, the less trustworthy the prediction. For highly non-normal X properties (e.g., fingerprints), the MD p-value is wildly inaccurate.

## Structural Similar Compounds

| Name               | Reserpine                                                           | Bitolterol                                                          | Emetine                                                             |
|--------------------|---------------------------------------------------------------------|---------------------------------------------------------------------|---------------------------------------------------------------------|
| Structure          |                                                                     |                                                                     |                                                                     |
| Actual Endpoint    | Carcinogen                                                          | Non-Carcinogen                                                      | Non-Carcinogen                                                      |
| Predicted Endpoint | Carcinogen                                                          | Non-Carcinogen                                                      | Non-Carcinogen                                                      |
| Distance           | 0.674                                                               | 0.766                                                               | 0.785                                                               |
| Reference          | US FDA (Centre for Drug Eval.& Res./Off. Testing & Res.) Sept. 1997 | US FDA (Centre for Drug Eval.& Res./Off. Testing & Res.) Sept. 1997 | US FDA (Centre for Drug Eval.& Res./Off. Testing & Res.) Sept. 1997 |

## Model Applicability

Unknown features are fingerprint features in the query molecule, but not found or appearing too infrequently in the training set.

- OPS PC8 out of range. Value: -4.4388. Training min, max, SD, explained variance: -3.693, 7.8709, 1.782, 0.0323.
- Unknown ECFP\_2 feature: 128986386: [\*]N=C(/C)[c](:[\*]):[\*]
- Unknown ECFP\_2 feature: 562081661: [\*]C(=NN=[\*])[\*]
- Unknown ECFP\_2 feature: -819426257: [\*]C(=NN=[\*])[\*]
- Unknown ECFP\_2 feature: 189949281: [\*]N=C\1/S[\*]=[\*]N1[\*]
- Unknown ECFP\_2 feature: -934225701: [\*]C(=[\*])C1=N[\*][\*]S1
- Unknown ECFP\_2 feature: -1110911409: [\*]=C1[\*][\*]=NN1[c](:[\*]):[\*]

## Feature Contribution

### Top features for positive contribution

| Fingerprint | Bit/Smiles | Feature Structure | Score | Carcinogen in training set |
|-------------|------------|-------------------|-------|----------------------------|
|             |            |                   |       |                            |

# Sorafenib

# TOPKAT\_Mouse\_Female\_FDA\_None\_vs\_Carcinogen

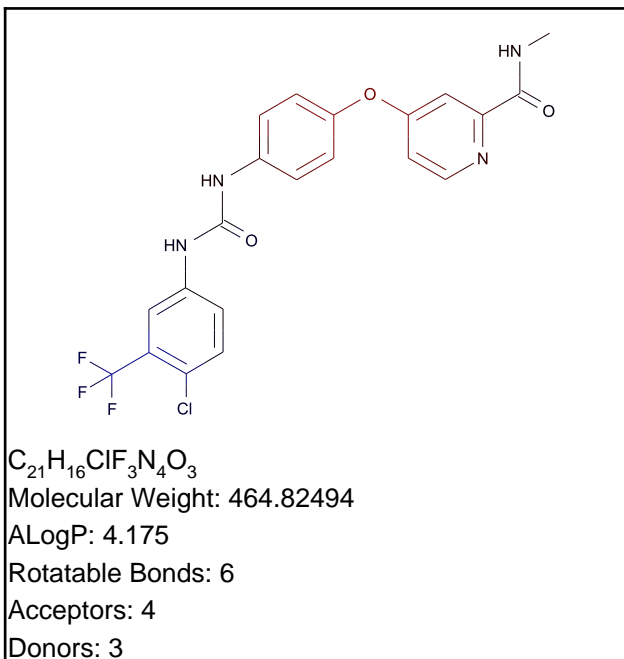

## Model Prediction

Prediction: **Carcinogen**

Probability: 0.257

Enrichment: 0.801

Bayesian Score: -0.321

Mahalanobis Distance: 14.9

Mahalanobis Distance p-value: 4.21e-007

Prediction: Positive if the Bayesian score is above the estimated best cutoff value from minimizing the false positive and false negative rate.

Probability: The estimated probability that the sample is in the positive category. This assumes that the Bayesian score follows a normal distribution and is different from the prediction using a cutoff.

Enrichment: An estimate of enrichment, that is, the increased likelihood (versus random) of this sample being in the category.  
 Bayesian Score: The standard Laplacian-modified Bayesian score.

Mahalanobis Distance: The Mahalanobis distance (MD) is the distance to the center of the training data. The larger the MD, the less trustworthy the prediction.

Mahalanobis Distance p-value: The p-value gives the fraction of training data with an MD greater than or equal to the one for the given sample, assuming normally distributed data. The smaller the p-value, the less trustworthy the prediction. For highly non-normal X properties (e.g., fingerprints), the MD p-value is wildly inaccurate.

## Structural Similar Compounds

| Name               | Glimepiride                                                                         | Glyburide                                                                           | Fluvastatin                                                                         |
|--------------------|-------------------------------------------------------------------------------------|-------------------------------------------------------------------------------------|-------------------------------------------------------------------------------------|
| Structure          | 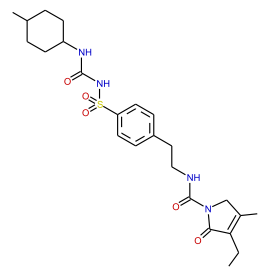 |  |  |
| Actual Endpoint    | Carcinogen                                                                          | Non-Carcinogen                                                                      | Non-Carcinogen                                                                      |
| Predicted Endpoint | Carcinogen                                                                          | Non-Carcinogen                                                                      | Non-Carcinogen                                                                      |
| Distance           | 0.605                                                                               | 0.615                                                                               | 0.625                                                                               |
| Reference          | US FDA (Centre for Drug Eval.& Res./Off. Testing & Res.) Sept. 1997                 | US FDA (Centre for Drug Eval.& Res./Off. Testing & Res.) Sept. 1997                 | US FDA (Centre for Drug Eval.& Res./Off. Testing & Res.) Sept. 1997                 |

## Model Applicability

Unknown features are fingerprint features in the query molecule, but not found or appearing too infrequently in the training set.

- OPS PC20 out of range. Value: -3.3309. Training min, max, SD, explained variance: -3.1862, 4.4571, 1.28, 0.0167.

## Feature Contribution

### Top features for positive contribution

| Fingerprint | Bit/Smiles | Feature Structure                                                                                                                               | Score | Carcinogen in training set |
|-------------|------------|-------------------------------------------------------------------------------------------------------------------------------------------------|-------|----------------------------|
| ECFP_6      | 738938915  | 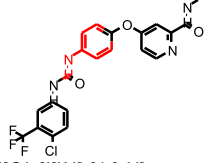<br><chem>[*]C(=[*])N[c]1:[cH]:[cH]:[*]:[cH]:[cH]:1</chem> | 0.617 | 2 out of 2                 |

# Sorafenib

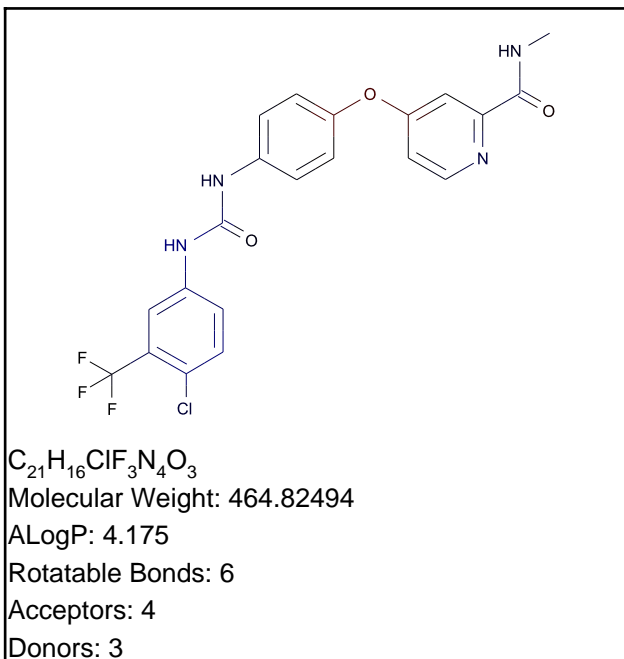

## Model Prediction

Prediction: Single-Carcinogen

Probability: 0.283

Enrichment: 0.691

Bayesian Score: -3.89

Mahalanobis Distance: 11.1

Mahalanobis Distance p-value: 0.00221

Prediction: Positive if the Bayesian score is above the estimated best cutoff value from minimizing the false positive and false negative rate.

Probability: The estimated probability that the sample is in the positive category. This assumes that the Bayesian score follows a normal distribution and is different from the prediction using a cutoff.

Enrichment: An estimate of enrichment, that is, the increased likelihood (versus random) of this sample being in the category.

Bayesian Score: The standard Laplacian-modified Bayesian score.

Mahalanobis Distance: The Mahalanobis distance (MD) is the distance to the center of the training data. The larger the MD, the less trustworthy the prediction.

Mahalanobis Distance p-value: The p-value gives the fraction of training data with an MD greater than or equal to the one for the given sample, assuming normally distributed data. The smaller the p-value, the less trustworthy the prediction. For highly non-normal X properties (e.g., fingerprints), the MD p-value is wildly inaccurate.

# TOPKAT\_Mouse\_Female\_FDA\_Single\_vs\_Multiple

## Structural Similar Compounds

| Name               | Glimepiride                                                                         | Labetalol                                                                           | Lansoprazole                                                                        |
|--------------------|-------------------------------------------------------------------------------------|-------------------------------------------------------------------------------------|-------------------------------------------------------------------------------------|
| Structure          | 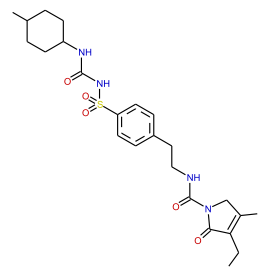 |  |  |
| Actual Endpoint    | Single-Carcinogen                                                                   | Single-Carcinogen                                                                   | Single-Carcinogen                                                                   |
| Predicted Endpoint | Single-Carcinogen                                                                   | Single-Carcinogen                                                                   | Single-Carcinogen                                                                   |
| Distance           | 0.599                                                                               | 0.808                                                                               | 0.820                                                                               |
| Reference          | US FDA (Centre for Drug Eval.& Res./Off. Testing & Res.) Sept. 1997                 | US FDA (Centre for Drug Eval.& Res./Off. Testing & Res.) Sept. 1997                 | US FDA (Centre for Drug Eval.& Res./Off. Testing & Res.) Sept. 1997                 |

## Model Applicability

Unknown features are fingerprint features in the query molecule, but not found or appearing too infrequently in the training set.

1. All properties and OPS components are within expected ranges.
2. Unknown ECFP\_2 feature: 1336678434: [\*][c](:[\*]):[c](C([\*])([\*])([\*])):c:[\*]
3. Unknown ECFP\_2 feature: -1952889961: [\*]:[c](:[\*])C(F)(F)F

## Feature Contribution

### Top features for positive contribution

| Fingerprint | Bit/Smiles | Feature Structure                                                                                                                | Score | Multiple-Carcinogen in training set |
|-------------|------------|----------------------------------------------------------------------------------------------------------------------------------|-------|-------------------------------------|
| ECFP_4      | -834094296 | 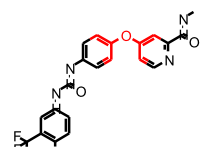<br>[*]:[cH]:[c](O[c](:[c]H):[*]):[c]H]:[*] | 0.351 | 1 out of 1                          |

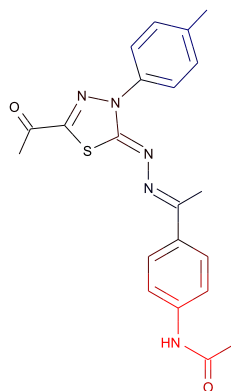

$C_{21}H_{21}N_5O_2S$

Molecular Weight: 407.48873

ALogP: 3.566

Rotatable Bonds: 5

Acceptors: 7

Donors: 1

## Model Prediction

**Prediction: Carcinogen**

Probability: 0.376

Enrichment: 1.28

Bayesian Score: 2.3

Mahalanobis Distance: 16.3

Mahalanobis Distance p-value: 2.15e-010

Prediction: Positive if the Bayesian score is above the estimated best cutoff value from minimizing the false positive and false negative rate.

Probability: The estimated probability that the sample is in the positive category. This assumes that the Bayesian score follows a normal distribution and is different from the prediction using a cutoff.

Enrichment: An estimate of enrichment, that is, the increased likelihood (versus random) of this sample being in the category.

Bayesian Score: The standard Laplacian-modified Bayesian score.

Mahalanobis Distance: The Mahalanobis distance (MD) is the distance to the center of the training data. The larger the MD, the less trustworthy the prediction.

Mahalanobis Distance p-value: The p-value gives the fraction of training data with an MD greater than or equal to the one for the given sample, assuming normally distributed data. The smaller the p-value, the less trustworthy the prediction. For highly non-normal X properties (e.g., fingerprints), the MD p-value is wildly inaccurate.

## Structural Similar Compounds

| Name               | Moricizine                                                          | Isradipine                                                          | Nisoldipine                                                         |
|--------------------|---------------------------------------------------------------------|---------------------------------------------------------------------|---------------------------------------------------------------------|
| Structure          |                                                                     |                                                                     |                                                                     |
| Actual Endpoint    | Non-Carcinogen                                                      | Non-Carcinogen                                                      | Non-Carcinogen                                                      |
| Predicted Endpoint | Non-Carcinogen                                                      | Non-Carcinogen                                                      | Non-Carcinogen                                                      |
| Distance           | 0.555                                                               | 0.599                                                               | 0.604                                                               |
| Reference          | US FDA (Centre for Drug Eval.& Res./Off. Testing & Res.) Sept. 1997 | US FDA (Centre for Drug Eval.& Res./Off. Testing & Res.) Sept. 1997 | US FDA (Centre for Drug Eval.& Res./Off. Testing & Res.) Sept. 1997 |

## Model Applicability

Unknown features are fingerprint features in the query molecule, but not found or appearing too infrequently in the training set.

1. OPS PC9 out of range. Value: 5.948. Training min, max, SD, explained variance: -5.0113, 5.5609, 1.7, 0.0303.

## Feature Contribution

### Top features for positive contribution

| Fingerprint | Bit/Smiles  | Feature Structure        | Score | Carcinogen in training set |
|-------------|-------------|--------------------------|-------|----------------------------|
| FCFP_6      | -1944671191 | <br>[*]:[c](:[*])NC(=O)C | 0.891 | 4 out of 4                 |

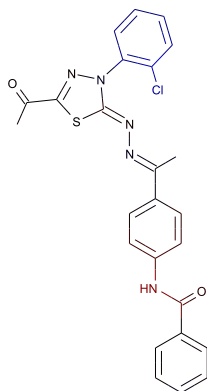

$C_{25}H_{20}ClN_5O_2S$

Molecular Weight: 489.97659

ALogP: 5.409

Rotatable Bonds: 6

Acceptors: 7

Donors: 1

## Model Prediction

Prediction: Non-Carcinogen

Probability: 0.249

Enrichment: 0.846

Bayesian Score: -2.34

Mahalanobis Distance: 17.4

Mahalanobis Distance p-value: 7.24e-013

Prediction: Positive if the Bayesian score is above the estimated best cutoff value from minimizing the false positive and false negative rate.

Probability: The estimated probability that the sample is in the positive category. This assumes that the Bayesian score follows a normal distribution and is different from the prediction using a cutoff.

Enrichment: An estimate of enrichment, that is, the increased likelihood (versus random) of this sample being in the category.

Bayesian Score: The standard Laplacian-modified Bayesian score.

Mahalanobis Distance: The Mahalanobis distance (MD) is the distance to the center of the training data. The larger the MD, the less trustworthy the prediction.

Mahalanobis Distance p-value: The p-value gives the fraction of training data with an MD greater than or equal to the one for the given sample, assuming normally distributed data. The smaller the p-value, the less trustworthy the prediction. For highly non-normal X properties (e.g., fingerprints), the MD p-value is wildly inaccurate.

## Structural Similar Compounds

| Name               | Fluticasone                                                         | Emetine                                                             | Moricizine                                                          |
|--------------------|---------------------------------------------------------------------|---------------------------------------------------------------------|---------------------------------------------------------------------|
| Structure          |                                                                     |                                                                     |                                                                     |
| Actual Endpoint    | Non-Carcinogen                                                      | Non-Carcinogen                                                      | Non-Carcinogen                                                      |
| Predicted Endpoint | Carcinogen                                                          | Non-Carcinogen                                                      | Non-Carcinogen                                                      |
| Distance           | 0.615                                                               | 0.672                                                               | 0.679                                                               |
| Reference          | US FDA (Centre for Drug Eval.& Res./Off. Testing & Res.) Sept. 1997 | US FDA (Centre for Drug Eval.& Res./Off. Testing & Res.) Sept. 1997 | US FDA (Centre for Drug Eval.& Res./Off. Testing & Res.) Sept. 1997 |

## Model Applicability

Unknown features are fingerprint features in the query molecule, but not found or appearing too infrequently in the training set.

1. All properties and OPS components are within expected ranges.

## Feature Contribution

### Top features for positive contribution

| Fingerprint | Bit/Smiles | Feature Structure                                         | Score | Carcinogen in training set |
|-------------|------------|-----------------------------------------------------------|-------|----------------------------|
| FCFP_6      | -581879738 | <br><chem>[*]NC(=O)[c]1:[cH]:[cH]:[cH]:[cH]:[cH]:1</chem> | 0.77  | 4 out of 5                 |



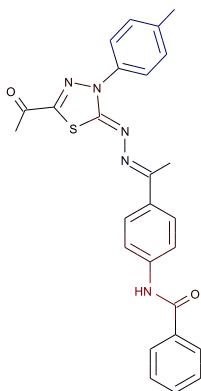

$C_{26}H_{23}N_5O_2S$

Molecular Weight: 469.55811

ALogP: 5.231

Rotatable Bonds: 6

Acceptors: 7

Donors: 1

## Model Prediction

**Prediction: Carcinogen**

Probability: 0.285

Enrichment: 0.97

Bayesian Score: -0.774

Mahalanobis Distance: 18.1

Mahalanobis Distance p-value: 1.74e-014

Prediction: Positive if the Bayesian score is above the estimated best cutoff value from minimizing the false positive and false negative rate.

Probability: The estimated probability that the sample is in the positive category. This assumes that the Bayesian score follows a normal distribution and is different from the prediction using a cutoff.

Enrichment: An estimate of enrichment, that is, the increased likelihood (versus random) of this sample being in the category.

Bayesian Score: The standard Laplacian-modified Bayesian score.

Mahalanobis Distance: The Mahalanobis distance (MD) is the distance to the center of the training data. The larger the MD, the less trustworthy the prediction.

Mahalanobis Distance p-value: The p-value gives the fraction of training data with an MD greater than or equal to the one for the given sample, assuming normally distributed data. The smaller the p-value, the less trustworthy the prediction. For highly non-normal X properties (e.g., fingerprints), the MD p-value is wildly inaccurate.

## Structural Similar Compounds

| Name               | Fluticasone                                                         | Moricizine                                                          | Emetine                                                             |
|--------------------|---------------------------------------------------------------------|---------------------------------------------------------------------|---------------------------------------------------------------------|
| Structure          |                                                                     |                                                                     |                                                                     |
| Actual Endpoint    | Non-Carcinogen                                                      | Non-Carcinogen                                                      | Non-Carcinogen                                                      |
| Predicted Endpoint | Carcinogen                                                          | Non-Carcinogen                                                      | Non-Carcinogen                                                      |
| Distance           | 0.614                                                               | 0.655                                                               | 0.669                                                               |
| Reference          | US FDA (Centre for Drug Eval.& Res./Off. Testing & Res.) Sept. 1997 | US FDA (Centre for Drug Eval.& Res./Off. Testing & Res.) Sept. 1997 | US FDA (Centre for Drug Eval.& Res./Off. Testing & Res.) Sept. 1997 |

## Model Applicability

Unknown features are fingerprint features in the query molecule, but not found or appearing too infrequently in the training set.

1. All properties and OPS components are within expected ranges.

## Feature Contribution

### Top features for positive contribution

| Fingerprint | Bit/Smiles | Feature Structure                                    | Score | Carcinogen in training set |
|-------------|------------|------------------------------------------------------|-------|----------------------------|
| FCFP_6      | -581879738 | <br><chem>[*]NC(=O)[c]1:[cH]:[cH]:[cH]:[cH]:1</chem> | 0.77  | 4 out of 5                 |



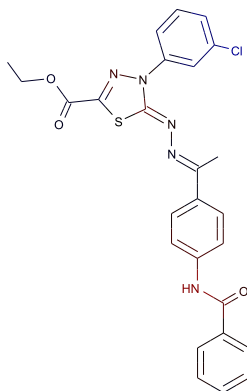

$C_{26}H_{22}ClN_5O_3S$

Molecular Weight: 520.00258

ALogP: 5.883

Rotatable Bonds: 8

Acceptors: 8

Donors: 1

## Model Prediction

Prediction: Non-Carcinogen

Probability: 0.247

Enrichment: 0.84

Bayesian Score: -2.42

Mahalanobis Distance: 15.2

Mahalanobis Distance p-value: 4.65e-008

Prediction: Positive if the Bayesian score is above the estimated best cutoff value from minimizing the false positive and false negative rate.

Probability: The estimated probability that the sample is in the positive category. This assumes that the Bayesian score follows a normal distribution and is different from the prediction using a cutoff.

Enrichment: An estimate of enrichment, that is, the increased likelihood (versus random) of this sample being in the category.

Bayesian Score: The standard Laplacian-modified Bayesian score.

Mahalanobis Distance: The Mahalanobis distance (MD) is the distance to the center of the training data. The larger the MD, the less trustworthy the prediction.

Mahalanobis Distance p-value: The p-value gives the fraction of training data with an MD greater than or equal to the one for the given sample, assuming normally distributed data. The smaller the p-value, the less trustworthy the prediction. For highly non-normal X properties (e.g., fingerprints), the MD p-value is wildly inaccurate.

## Structural Similar Compounds

| Name               | Reserpine                                                           | Nicardipine                                                         | Bitolterol                                                          |
|--------------------|---------------------------------------------------------------------|---------------------------------------------------------------------|---------------------------------------------------------------------|
| Structure          |                                                                     |                                                                     |                                                                     |
| Actual Endpoint    | Carcinogen                                                          | Non-Carcinogen                                                      | Non-Carcinogen                                                      |
| Predicted Endpoint | Carcinogen                                                          | Non-Carcinogen                                                      | Non-Carcinogen                                                      |
| Distance           | 0.689                                                               | 0.728                                                               | 0.734                                                               |
| Reference          | US FDA (Centre for Drug Eval.& Res./Off. Testing & Res.) Sept. 1997 | US FDA (Centre for Drug Eval.& Res./Off. Testing & Res.) Sept. 1997 | US FDA (Centre for Drug Eval.& Res./Off. Testing & Res.) Sept. 1997 |

## Model Applicability

Unknown features are fingerprint features in the query molecule, but not found or appearing too infrequently in the training set.

1. All properties and OPS components are within expected ranges.

## Feature Contribution

### Top features for positive contribution

| Fingerprint | Bit/Smiles | Feature Structure                                    | Score | Carcinogen in training set |
|-------------|------------|------------------------------------------------------|-------|----------------------------|
| FCFP_6      | -581879738 | <br><chem>[*]NC(=O)[c]1:[cH]:[cH]:[cH]:[cH]:1</chem> | 0.77  | 4 out of 5                 |

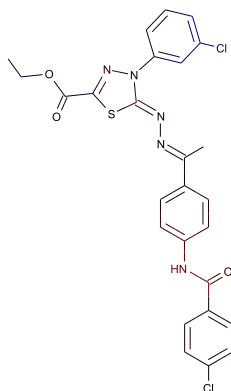

$C_{26}H_{21}Cl_2N_5O_3S$

Molecular Weight: 554.44763

ALogP: 6.547

Rotatable Bonds: 8

Acceptors: 8

Donors: 1

## Model Prediction

**Prediction: Carcinogen**

Probability: 0.262

Enrichment: 0.89

Bayesian Score: -1.75

Mahalanobis Distance: 15.3

Mahalanobis Distance p-value: 1.98e-008

Prediction: Positive if the Bayesian score is above the estimated best cutoff value from minimizing the false positive and false negative rate.

Probability: The estimated probability that the sample is in the positive category. This assumes that the Bayesian score follows a normal distribution and is different from the prediction using a cutoff.

Enrichment: An estimate of enrichment, that is, the increased likelihood (versus random) of this sample being in the category.

Bayesian Score: The standard Laplacian-modified Bayesian score.

Mahalanobis Distance: The Mahalanobis distance (MD) is the distance to the center of the training data. The larger the MD, the less trustworthy the prediction.

Mahalanobis Distance p-value: The p-value gives the fraction of training data with an MD greater than or equal to the one for the given sample, assuming normally distributed data. The smaller the p-value, the less trustworthy the prediction. For highly non-normal X properties (e.g., fingerprints), the MD p-value is wildly inaccurate.

## Structural Similar Compounds

| Name               | Reserpine                                                           | Bitolterol                                                          | Emetine                                                             |
|--------------------|---------------------------------------------------------------------|---------------------------------------------------------------------|---------------------------------------------------------------------|
| Structure          |                                                                     |                                                                     |                                                                     |
| Actual Endpoint    | Carcinogen                                                          | Non-Carcinogen                                                      | Non-Carcinogen                                                      |
| Predicted Endpoint | Carcinogen                                                          | Non-Carcinogen                                                      | Non-Carcinogen                                                      |
| Distance           | 0.671                                                               | 0.767                                                               | 0.780                                                               |
| Reference          | US FDA (Centre for Drug Eval.& Res./Off. Testing & Res.) Sept. 1997 | US FDA (Centre for Drug Eval.& Res./Off. Testing & Res.) Sept. 1997 | US FDA (Centre for Drug Eval.& Res./Off. Testing & Res.) Sept. 1997 |

## Model Applicability

Unknown features are fingerprint features in the query molecule, but not found or appearing too infrequently in the training set.

1. All properties and OPS components are within expected ranges.

## Feature Contribution

### Top features for positive contribution

| Fingerprint | Bit/Smiles | Feature Structure                                    | Score | Carcinogen in training set |
|-------------|------------|------------------------------------------------------|-------|----------------------------|
| FCFP_6      | -581879738 | <br><chem>[*]NC(=O)[c]1:[cH]:[cH]:[cH]:[cH]:1</chem> | 0.77  | 4 out of 5                 |

# Sorafenib

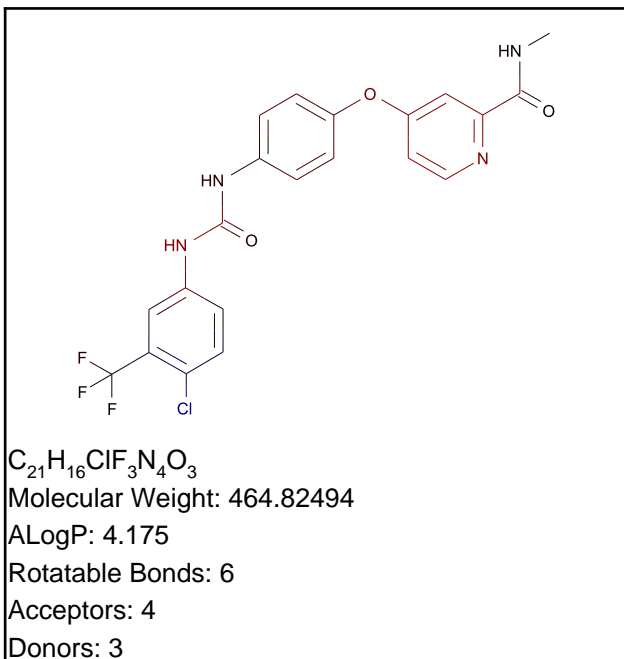

## Model Prediction

Prediction: **Carcinogen**

Probability: 0.444

Enrichment: 1.51

Bayesian Score: 4.21

Mahalanobis Distance: 20.3

Mahalanobis Distance p-value: 1.28e-019

Prediction: Positive if the Bayesian score is above the estimated best cutoff value from minimizing the false positive and false negative rate.

Probability: The estimated probability that the sample is in the positive category. This assumes that the Bayesian score follows a normal distribution and is different from the prediction using a cutoff.

Enrichment: An estimate of enrichment, that is, the increased likelihood (versus random) of this sample being in the category.

Bayesian Score: The standard Laplacian-modified Bayesian score.

Mahalanobis Distance: The Mahalanobis distance (MD) is the distance to the center of the training data. The larger the MD, the less trustworthy the prediction.

Mahalanobis Distance p-value: The p-value gives the fraction of training data with an MD greater than or equal to the one for the given sample, assuming normally distributed data. The smaller the p-value, the less trustworthy the prediction. For highly non-normal X properties (e.g., fingerprints), the MD p-value is wildly inaccurate.

# TOPKAT\_Mouse\_Male\_FDA\_None\_vs\_Carcinogen

## Structural Similar Compounds

| Name               | Glyburide                                                                           | Glimepiride                                                                         | Fluvastatin                                                                         |
|--------------------|-------------------------------------------------------------------------------------|-------------------------------------------------------------------------------------|-------------------------------------------------------------------------------------|
| Structure          | 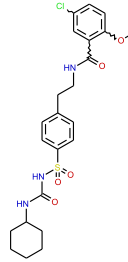 |  |  |
| Actual Endpoint    | Non-Carcinogen                                                                      | Carcinogen                                                                          | Non-Carcinogen                                                                      |
| Predicted Endpoint | Non-Carcinogen                                                                      | Carcinogen                                                                          | Non-Carcinogen                                                                      |
| Distance           | 0.594                                                                               | 0.599                                                                               | 0.603                                                                               |
| Reference          | US FDA (Centre for Drug Eval.& Res./Off. Testing & Res.) Sept. 1997                 | US FDA (Centre for Drug Eval.& Res./Off. Testing & Res.) Sept. 1997                 | US FDA (Centre for Drug Eval.& Res./Off. Testing & Res.) Sept. 1997                 |

## Model Applicability

Unknown features are fingerprint features in the query molecule, but not found or appearing too infrequently in the training set.

1. All properties and OPS components are within expected ranges.

## Feature Contribution

### Top features for positive contribution

| Fingerprint | Bit/Smiles | Feature Structure                                                                                        | Score | Carcinogen in training set |
|-------------|------------|----------------------------------------------------------------------------------------------------------|-------|----------------------------|
| FCFP_6      | 71953198   | 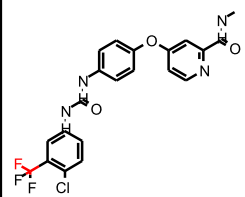<br>[*]C([*])([*])F | 0.612 | 12 out of 23               |

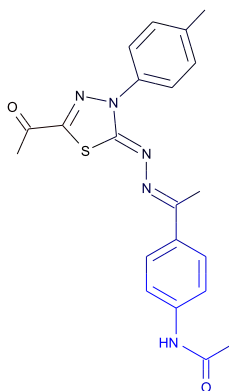

$C_{21}H_{21}N_5O_2S$

Molecular Weight: 407.48873

ALogP: 3.566

Rotatable Bonds: 5

Acceptors: 7

Donors: 1

## Model Prediction

Prediction: Single-Carcinogen

Probability: 0.145

Enrichment: 0.48

Bayesian Score: -14.1

Mahalanobis Distance: 14.2

Mahalanobis Distance p-value: 1e-005

Prediction: Positive if the Bayesian score is above the estimated best cutoff value from minimizing the false positive and false negative rate.

Probability: The estimated probability that the sample is in the positive category. This assumes that the Bayesian score follows a normal distribution and is different from the prediction using a cutoff.

Enrichment: An estimate of enrichment, that is, the increased likelihood (versus random) of this sample being in the category.

Bayesian Score: The standard Laplacian-modified Bayesian score.

Mahalanobis Distance: The Mahalanobis distance (MD) is the distance to the center of the training data. The larger the MD, the less trustworthy the prediction.

Mahalanobis Distance p-value: The p-value gives the fraction of training data with an MD greater than or equal to the one for the given sample, assuming normally distributed data. The smaller the p-value, the less trustworthy the prediction. For highly non-normal X properties (e.g., fingerprints), the MD p-value is wildly inaccurate.

## Structural Similar Compounds

| Name               | Bicalutamide                                                        | Lovastatin                                                          | Griseofulvin                                                        |
|--------------------|---------------------------------------------------------------------|---------------------------------------------------------------------|---------------------------------------------------------------------|
| Structure          |                                                                     |                                                                     |                                                                     |
| Actual Endpoint    | Single-Carcinogen                                                   | Multiple-Carcinogen                                                 | Single-Carcinogen                                                   |
| Predicted Endpoint | Single-Carcinogen                                                   | Multiple-Carcinogen                                                 | Single-Carcinogen                                                   |
| Distance           | 0.740                                                               | 0.752                                                               | 0.754                                                               |
| Reference          | US FDA (Centre for Drug Eval.& Res./Off. Testing & Res.) Sept. 1997 | US FDA (Centre for Drug Eval.& Res./Off. Testing & Res.) Sept. 1997 | US FDA (Centre for Drug Eval.& Res./Off. Testing & Res.) Sept. 1997 |

## Model Applicability

Unknown features are fingerprint features in the query molecule, but not found or appearing too infrequently in the training set.

- OPS PC12 out of range. Value: 2.4658. Training min, max, SD, explained variance: -3.4599, 2.3291, 1.246, 0.0290.

## Feature Contribution

### Top features for positive contribution

| Fingerprint | Bit/Smiles | Feature Structure                     | Score | Multiple-Carcinogen in training set |
|-------------|------------|---------------------------------------|-------|-------------------------------------|
| FCFP_12     | 565998553  | <br><chem>[*]C(=*)C1=N[*][*]S1</chem> | 0.194 | 6 out of 14                         |

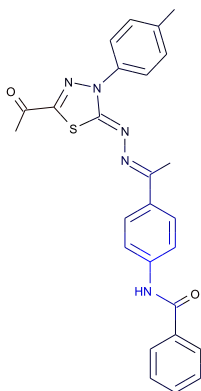

$C_{26}H_{23}N_5O_2S$

Molecular Weight: 469.55811

ALogP: 5.231

Rotatable Bonds: 6

Acceptors: 7

Donors: 1

## Model Prediction

Prediction: Single-Carcinogen

Probability: 0.146

Enrichment: 0.484

Bayesian Score: -9.63

Mahalanobis Distance: 13.9

Mahalanobis Distance p-value: 1.87e-005

Prediction: Positive if the Bayesian score is above the estimated best cutoff value from minimizing the false positive and false negative rate.

Probability: The estimated probability that the sample is in the positive category. This assumes that the Bayesian score follows a normal distribution and is different from the prediction using a cutoff.

Enrichment: An estimate of enrichment, that is, the increased likelihood (versus random) of this sample being in the category.

Bayesian Score: The standard Laplacian-modified Bayesian score.

Mahalanobis Distance: The Mahalanobis distance (MD) is the distance to the center of the training data. The larger the MD, the less trustworthy the prediction.

Mahalanobis Distance p-value: The p-value gives the fraction of training data with an MD greater than or equal to the one for the given sample, assuming normally distributed data. The smaller the p-value, the less trustworthy the prediction. For highly non-normal X properties (e.g., fingerprints), the MD p-value is wildly inaccurate.

## Structural Similar Compounds

| Name               | Simvastatin                                                         | Lovastatin                                                          | Bicalutamide                                                        |
|--------------------|---------------------------------------------------------------------|---------------------------------------------------------------------|---------------------------------------------------------------------|
| Structure          |                                                                     |                                                                     |                                                                     |
| Actual Endpoint    | Multiple-Carcinogen                                                 | Multiple-Carcinogen                                                 | Single-Carcinogen                                                   |
| Predicted Endpoint | Multiple-Carcinogen                                                 | Multiple-Carcinogen                                                 | Single-Carcinogen                                                   |
| Distance           | 0.736                                                               | 0.750                                                               | 0.808                                                               |
| Reference          | US FDA (Centre for Drug Eval.& Res./Off. Testing & Res.) Sept. 1997 | US FDA (Centre for Drug Eval.& Res./Off. Testing & Res.) Sept. 1997 | US FDA (Centre for Drug Eval.& Res./Off. Testing & Res.) Sept. 1997 |

## Model Applicability

Unknown features are fingerprint features in the query molecule, but not found or appearing too infrequently in the training set.

1. OPS PC12 out of range. Value: 3.8138. Training min, max, SD, explained variance: -3.4599, 2.3291, 1.246, 0.0290.

## Feature Contribution

### Top features for positive contribution

| Fingerprint | Bit/Smiles | Feature Structure                                    | Score | Multiple-Carcinogen in training set |
|-------------|------------|------------------------------------------------------|-------|-------------------------------------|
| FCFP_12     | -581879738 | <br><chem>[*]NC(=O)[c]1:[cH]:[cH]:[cH]:[cH]:1</chem> | 0.239 | 2 out of 4                          |

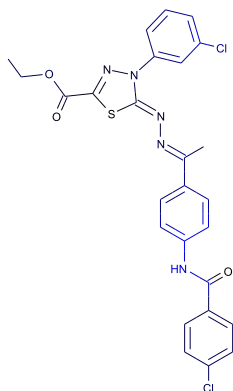

$C_{26}H_{21}Cl_2N_5O_3S$

Molecular Weight: 554.44763

ALogP: 6.547

Rotatable Bonds: 8

Acceptors: 8

Donors: 1

## Model Prediction

Prediction: Single-Carcinogen

Probability: 0.132

Enrichment: 0.439

Bayesian Score: -15.5

Mahalanobis Distance: 13.7

Mahalanobis Distance p-value: 2.65e-005

Prediction: Positive if the Bayesian score is above the estimated best cutoff value from minimizing the false positive and false negative rate.

Probability: The estimated probability that the sample is in the positive category. This assumes that the Bayesian score follows a normal distribution and is different from the prediction using a cutoff.

Enrichment: An estimate of enrichment, that is, the increased likelihood (versus random) of this sample being in the category.

Bayesian Score: The standard Laplacian-modified Bayesian score.

Mahalanobis Distance: The Mahalanobis distance (MD) is the distance to the center of the training data. The larger the MD, the less trustworthy the prediction.

Mahalanobis Distance p-value: The p-value gives the fraction of training data with an MD greater than or equal to the one for the given sample, assuming normally distributed data. The smaller the p-value, the less trustworthy the prediction. For highly non-normal X properties (e.g., fingerprints), the MD p-value is wildly inaccurate.

## Structural Similar Compounds

| Name               | Reserpine                                                           | Simvastatin                                                         | Lovastatin                                                          |
|--------------------|---------------------------------------------------------------------|---------------------------------------------------------------------|---------------------------------------------------------------------|
| Structure          |                                                                     |                                                                     |                                                                     |
| Actual Endpoint    | Multiple-Carcinogen                                                 | Multiple-Carcinogen                                                 | Multiple-Carcinogen                                                 |
| Predicted Endpoint | Multiple-Carcinogen                                                 | Multiple-Carcinogen                                                 | Multiple-Carcinogen                                                 |
| Distance           | 0.697                                                               | 0.918                                                               | 0.944                                                               |
| Reference          | US FDA (Centre for Drug Eval.& Res./Off. Testing & Res.) Sept. 1997 | US FDA (Centre for Drug Eval.& Res./Off. Testing & Res.) Sept. 1997 | US FDA (Centre for Drug Eval.& Res./Off. Testing & Res.) Sept. 1997 |

## Model Applicability

Unknown features are fingerprint features in the query molecule, but not found or appearing too infrequently in the training set.

1. All properties and OPS components are within expected ranges.

## Feature Contribution

### Top features for positive contribution

| Fingerprint | Bit/Smiles | Feature Structure                                    | Score | Multiple-Carcinogen in training set |
|-------------|------------|------------------------------------------------------|-------|-------------------------------------|
| FCFP_12     | -581879738 | <br><chem>[*]NC(=O)[c]1:[cH]:[cH]:[cH]:[cH]:1</chem> | 0.239 | 2 out of 4                          |

# Sorafenib

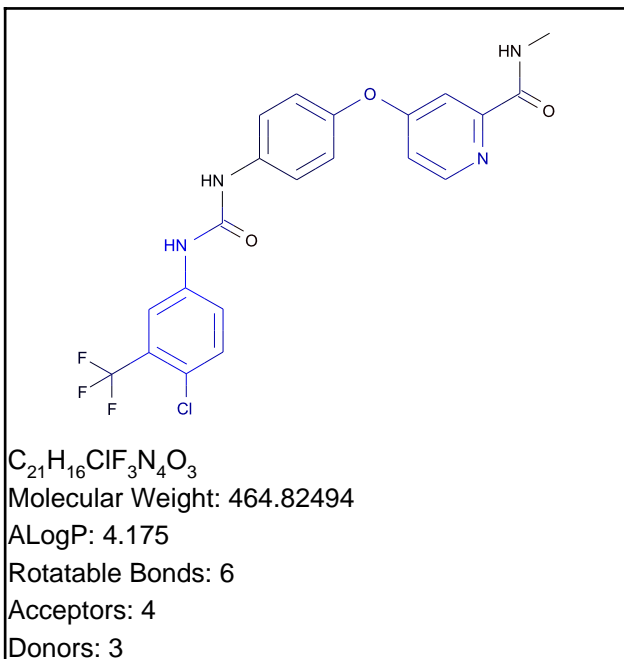

## Model Prediction

Prediction: Single-Carcinogen

Probability: 0.139

Enrichment: 0.461

Bayesian Score: -14.7

Mahalanobis Distance: 21.3

Mahalanobis Distance p-value: 4.93e-011

Prediction: Positive if the Bayesian score is above the estimated best cutoff value from minimizing the false positive and false negative rate.

Probability: The estimated probability that the sample is in the positive category. This assumes that the Bayesian score follows a normal distribution and is different from the prediction using a cutoff.

Enrichment: An estimate of enrichment, that is, the increased likelihood (versus random) of this sample being in the category.

Bayesian Score: The standard Laplacian-modified Bayesian score.

Mahalanobis Distance: The Mahalanobis distance (MD) is the distance to the center of the training data. The larger the MD, the less trustworthy the prediction.

Mahalanobis Distance p-value: The p-value gives the fraction of training data with an MD greater than or equal to the one for the given sample, assuming normally distributed data. The smaller the p-value, the less trustworthy the prediction. For highly non-normal X properties (e.g., fingerprints), the MD p-value is wildly inaccurate.

# TOPKAT\_Mouse\_Male\_FDA\_Single\_vs\_Multiple

## Structural Similar Compounds

| Name               | Glimepiride                                                                         | Bicalutamide                                                                        | Lansoprazole                                                                        |
|--------------------|-------------------------------------------------------------------------------------|-------------------------------------------------------------------------------------|-------------------------------------------------------------------------------------|
| Structure          | 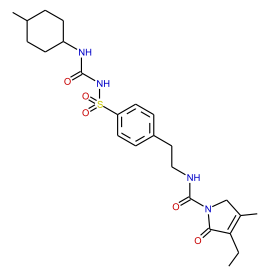 |  |  |
| Actual Endpoint    | Single-Carcinogen                                                                   | Single-Carcinogen                                                                   | Single-Carcinogen                                                                   |
| Predicted Endpoint | Single-Carcinogen                                                                   | Single-Carcinogen                                                                   | Single-Carcinogen                                                                   |
| Distance           | 0.626                                                                               | 0.700                                                                               | 0.866                                                                               |
| Reference          | US FDA (Centre for Drug Eval.& Res./Off. Testing & Res.) Sept. 1997                 | US FDA (Centre for Drug Eval.& Res./Off. Testing & Res.) Sept. 1997                 | US FDA (Centre for Drug Eval.& Res./Off. Testing & Res.) Sept. 1997                 |

## Model Applicability

Unknown features are fingerprint features in the query molecule, but not found or appearing too infrequently in the training set.

- All properties and OPS components are within expected ranges.

## Feature Contribution

### Top features for positive contribution

| Fingerprint | Bit/Smiles | Feature Structure                                                                                      | Score | Multiple-Carcinogen in training set |
|-------------|------------|--------------------------------------------------------------------------------------------------------|-------|-------------------------------------|
| FCFP_12     | 1499521844 | 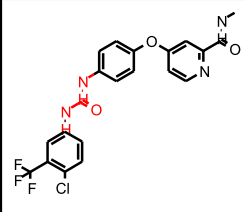<br>[*]NC(=O)N[*] | 0.39  | 5 out of 9                          |

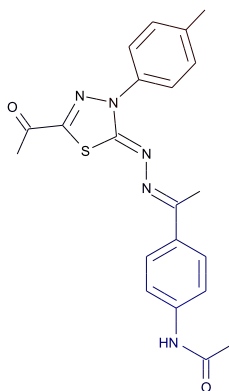

$C_{21}H_{21}N_5O_2S$

Molecular Weight: 407.48873

ALogP: 3.566

Rotatable Bonds: 5

Acceptors: 7

Donors: 1

## Model Prediction

Prediction: Mild

Probability: 0.732

Enrichment: 1.06

Bayesian Score: -2.9

Mahalanobis Distance: 10.2

Mahalanobis Distance p-value: 0.0561

Prediction: Positive if the Bayesian score is above the estimated best cutoff value from minimizing the false positive and false negative rate.

Probability: The estimated probability that the sample is in the positive category. This assumes that the Bayesian score follows a normal distribution and is different from the prediction using a cutoff.

Enrichment: An estimate of enrichment, that is, the increased likelihood (versus random) of this sample being in the category.

Bayesian Score: The standard Laplacian-modified Bayesian score.

Mahalanobis Distance: The Mahalanobis distance (MD) is the distance to the center of the training data. The larger the MD, the less trustworthy the prediction.

Mahalanobis Distance p-value: The p-value gives the fraction of training data with an MD greater than or equal to the one for the given sample, assuming normally distributed data. The smaller the p-value, the less trustworthy the prediction. For highly non-normal X properties (e.g., fingerprints), the MD p-value is wildly inaccurate.

## Structural Similar Compounds

| Name               | COLCHICINE       | 1;8;9-ANTHRACENETRIOL; TRIACETATE | ANTHRAQUINONE; 1;1'-IMINODI- |
|--------------------|------------------|-----------------------------------|------------------------------|
| Structure          |                  |                                   |                              |
| Actual Endpoint    | Moderate_Severe  | Moderate_Severe                   | Mild                         |
| Predicted Endpoint | Moderate_Severe  | Moderate_Severe                   | Mild                         |
| Distance           | 0.621            | 0.738                             | 0.741                        |
| Reference          | AJOPAA 31;837;48 | BJOPAL 53;819;69                  | 28ZPAK-;125;72               |

## Model Applicability

Unknown features are fingerprint features in the query molecule, but not found or appearing too infrequently in the training set.

1. All properties and OPS components are within expected ranges.

## Feature Contribution

### Top features for positive contribution

| Fingerprint | Bit/Smiles | Feature Structure                                     | Score | Moderate_Severe in training set |
|-------------|------------|-------------------------------------------------------|-------|---------------------------------|
| FCFP_10     | 633795852  | <br>[*]N(*)[c]1:[cH]:[*]<br>H]:[c](C):[cH]:[cH]:<br>1 | 0.294 | 3 out of 3                      |



20a

## TOPKAT\_Ocular\_Irritancy\_Mild\_vs\_Moderate\_Severe

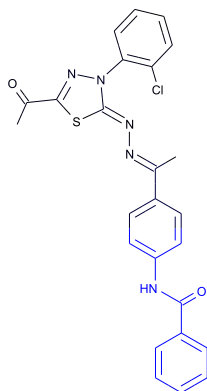C<sub>25</sub>H<sub>20</sub>ClN<sub>5</sub>O<sub>2</sub>S

Molecular Weight: 489.97659

ALogP: 5.409

Rotatable Bonds: 6

Acceptors: 7

Donors: 1

**Model Prediction**

Prediction: Mild

Probability: 0.0279

Enrichment: 0.0405

Bayesian Score: -13

Mahalanobis Distance: 11.2

Mahalanobis Distance p-value: 0.00264

Prediction: Positive if the Bayesian score is above the estimated best cutoff value from minimizing the false positive and false negative rate.

Probability: The estimated probability that the sample is in the positive category. This assumes that the Bayesian score follows a normal distribution and is different from the prediction using a cutoff.

Enrichment: An estimate of enrichment, that is, the increased likelihood (versus random) of this sample being in the category.

Bayesian Score: The standard Laplacian-modified Bayesian score.

Mahalanobis Distance: The Mahalanobis distance (MD) is the distance to the center of the training data. The larger the MD, the less trustworthy the prediction.

Mahalanobis Distance p-value: The p-value gives the fraction of training data with an MD greater than or equal to the one for the given sample, assuming normally distributed data. The smaller the p-value, the less trustworthy the prediction. For highly non-normal X properties (e.g., fingerprints), the MD p-value is wildly inaccurate.

**Structural Similar Compounds**

| Name               | ANTHRAQUINONE; 1;1'-IMINODI- | 1-BENZOYLAMINO-4-METHOXY-5-CHLORANTHRAQUINONE | 2-(1'-ANTHRAQUINONYL)-AMINOBENZANTHRONE |
|--------------------|------------------------------|-----------------------------------------------|-----------------------------------------|
| Structure          |                              |                                               |                                         |
| Actual Endpoint    | Mild                         | Mild                                          | Mild                                    |
| Predicted Endpoint | Mild                         | Mild                                          | Mild                                    |
| Distance           | 0.697                        | 0.762                                         | 0.806                                   |
| Reference          | 28ZPAK-;125;72               | 28ZPAK-;90;72                                 | 28ZPAK-;126;72                          |

**Model Applicability**

Unknown features are fingerprint features in the query molecule, but not found or appearing too infrequently in the training set.

1. All properties and OPS components are within expected ranges.

**Feature Contribution****Top features for positive contribution**

| Fingerprint | Bit/Smiles  | Feature Structure                           | Score | Moderate_Severe in training set |
|-------------|-------------|---------------------------------------------|-------|---------------------------------|
| FCFP_10     | -1881275701 | <br>[*]N[*][c]1:[cH]:[cH]:[cH]:[cH]:[c]:1Cl | 0.186 | 1 out of 1                      |

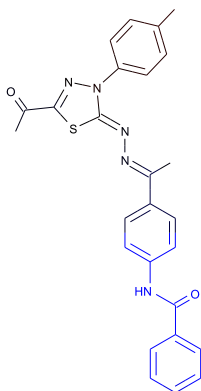

$C_{26}H_{23}N_5O_2S$

Molecular Weight: 469.55811

ALogP: 5.231

Rotatable Bonds: 6

Acceptors: 7

Donors: 1

## Model Prediction

Prediction: Mild

Probability: 0.0584

Enrichment: 0.0848

Bayesian Score: -11.8

Mahalanobis Distance: 10.6

Mahalanobis Distance p-value: 0.0173

Prediction: Positive if the Bayesian score is above the estimated best cutoff value from minimizing the false positive and false negative rate.

Probability: The estimated probability that the sample is in the positive category. This assumes that the Bayesian score follows a normal distribution and is different from the prediction using a cutoff.

Enrichment: An estimate of enrichment, that is, the increased likelihood (versus random) of this sample being in the category.

Bayesian Score: The standard Laplacian-modified Bayesian score.

Mahalanobis Distance: The Mahalanobis distance (MD) is the distance to the center of the training data. The larger the MD, the less trustworthy the prediction.

Mahalanobis Distance p-value: The p-value gives the fraction of training data with an MD greater than or equal to the one for the given sample, assuming normally distributed data. The smaller the p-value, the less trustworthy the prediction. For highly non-normal X properties (e.g., fingerprints), the MD p-value is wildly inaccurate.

## Structural Similar Compounds

| Name               | ANTHRAQUINONE; 1;1'-IMINODI- | 1-BENZOYLAMINO-4-METHOXY-5-CHLORANTHRAQUINONE | Benzoic acid; p-(N-butyl-2-(butylamino)acetamido)-; butyl ester; |
|--------------------|------------------------------|-----------------------------------------------|------------------------------------------------------------------|
| Structure          |                              |                                               |                                                                  |
| Actual Endpoint    | Mild                         | Mild                                          | Moderate_Severe                                                  |
| Predicted Endpoint | Mild                         | Mild                                          | Moderate_Severe                                                  |
| Distance           | 0.683                        | 0.756                                         | 0.800                                                            |
| Reference          | 28ZPAK-;125;72               | 28ZPAK-;90;72                                 | Arzneimittel-Forschung 8;609;58                                  |

## Model Applicability

Unknown features are fingerprint features in the query molecule, but not found or appearing too infrequently in the training set.

- All properties and OPS components are within expected ranges.

## Feature Contribution

### Top features for positive contribution

| Fingerprint | Bit/Smiles | Feature Structure                               | Score | Moderate_Severe in training set |
|-------------|------------|-------------------------------------------------|-------|---------------------------------|
| FCFP_10     | 633795852  | <br>[*]N[*][c]1:[cH][c]H:[c](C):[cH]:[cH]:<br>1 | 0.294 | 3 out of 3                      |



21b

## TOPKAT\_Ocular\_Irritancy\_Mild\_vs\_Moderate\_Severe

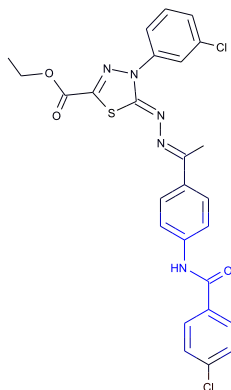
 $C_{26}H_{21}Cl_2N_5O_3S$ 

Molecular Weight: 554.44763

ALogP: 6.547

Rotatable Bonds: 8

Acceptors: 8

Donors: 1

**Model Prediction**

Prediction: Mild

Probability: 0.221

Enrichment: 0.321

Bayesian Score: -9.06

Mahalanobis Distance: 9.68

Mahalanobis Distance p-value: 0.189

Prediction: Positive if the Bayesian score is above the estimated best cutoff value from minimizing the false positive and false negative rate.

Probability: The estimated probability that the sample is in the positive category. This assumes that the Bayesian score follows a normal distribution and is different from the prediction using a cutoff.

Enrichment: An estimate of enrichment, that is, the increased likelihood (versus random) of this sample being in the category.

Bayesian Score: The standard Laplacian-modified Bayesian score.

Mahalanobis Distance: The Mahalanobis distance (MD) is the distance to the center of the training data. The larger the MD, the less trustworthy the prediction.

Mahalanobis Distance p-value: The p-value gives the fraction of training data with an MD greater than or equal to the one for the given sample, assuming normally distributed data. The smaller the p-value, the less trustworthy the prediction. For highly non-normal X properties (e.g., fingerprints), the MD p-value is wildly inaccurate.

**Structural Similar Compounds**

| Name               | Anthraquinone; 1;1'-(anthraquinon-1;5-ylenediimino)di-                 | Anthraquinone; 1;1'-(anthraquinon-1;4-ylenediimino)di-                 | ANTHRAQUINONE; 1;1'-IMINODI- |
|--------------------|------------------------------------------------------------------------|------------------------------------------------------------------------|------------------------------|
| Structure          |                                                                        |                                                                        |                              |
| Actual Endpoint    | Mild                                                                   | Mild                                                                   | Mild                         |
| Predicted Endpoint | Mild                                                                   | Mild                                                                   | Mild                         |
| Distance           | 0.794                                                                  | 0.796                                                                  | 0.872                        |
| Reference          | Prehled Prumyslove Toxikologie; Organicke Latky; Marhold; J. pp 736;86 | Prehled Prumyslove Toxikologie; Organicke Latky; Marhold; J. pp 736;86 | 28ZPAK-;125;72               |

**Model Applicability**

Unknown features are fingerprint features in the query molecule, but not found or appearing too infrequently in the training set.

1. All properties and OPS components are within expected ranges.

**Feature Contribution****Top features for positive contribution**

| Fingerprint | Bit/Smiles | Feature Structure                                | Score | Moderate_Severe in training set |
|-------------|------------|--------------------------------------------------|-------|---------------------------------|
| FCFP_10     | -149636017 | <br>[*]C(=[*])[c]1:[cH]:[cH]:[c](Cl):[cH]:[cH]:1 | 0.352 | 7 out of 7                      |

# Sorafenib

# TOPKAT\_Ocular\_Irritancy\_Mild\_vs\_Moderate\_Severe

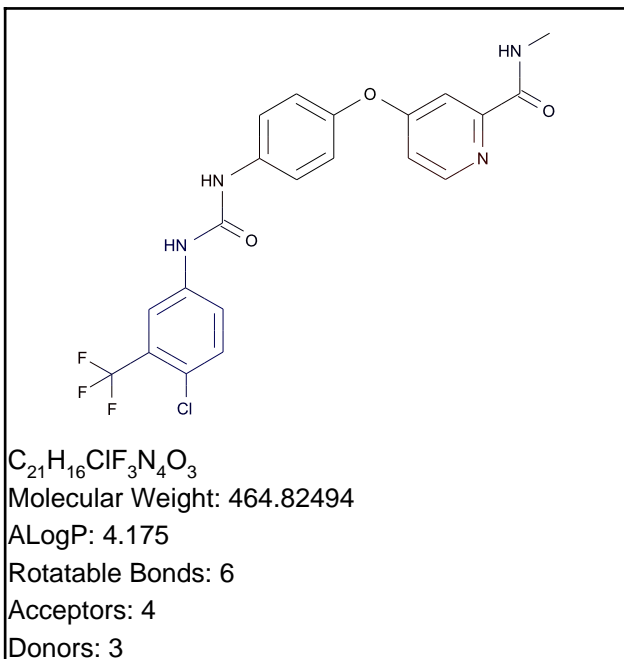

## Model Prediction

Prediction: Mild

Probability: 0.776

Enrichment: 1.13

Bayesian Score: -1.8

Mahalanobis Distance: 8.95

Mahalanobis Distance p-value: 0.537

Prediction: Positive if the Bayesian score is above the estimated best cutoff value from minimizing the false positive and false negative rate.

Probability: The estimated probability that the sample is in the positive category. This assumes that the Bayesian score follows a normal distribution and is different from the prediction using a cutoff.

Enrichment: An estimate of enrichment, that is, the increased likelihood (versus random) of this sample being in the category.

Bayesian Score: The standard Laplacian-modified Bayesian score.

Mahalanobis Distance: The Mahalanobis distance (MD) is the distance to the center of the training data. The larger the MD, the less trustworthy the prediction.

Mahalanobis Distance p-value: The p-value gives the fraction of training data with an MD greater than or equal to the one for the given sample, assuming normally distributed data. The smaller the p-value, the less trustworthy the prediction. For highly non-normal X properties (e.g., fingerprints), the MD p-value is wildly inaccurate.

## Structural Similar Compounds

| Name               | 4;4'-DIAMINO-1;1'-DIANTHRIMIDE                                                      | 5-NORBORNENE-2;3-DICARBOXYLIC ACID; 1;4;5;6;7;7-HEXACHLORO-                         | METHANE;TRIS(4-AMINOPHENYL)-                                                        |
|--------------------|-------------------------------------------------------------------------------------|-------------------------------------------------------------------------------------|-------------------------------------------------------------------------------------|
| Structure          | 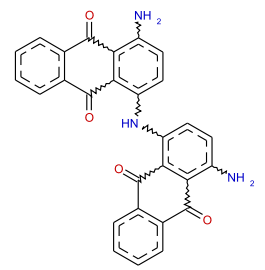 |  |  |
| Actual Endpoint    | Mild                                                                                | Moderate_Severe                                                                     | Moderate_Severe                                                                     |
| Predicted Endpoint | Mild                                                                                | Moderate_Severe                                                                     | Moderate_Severe                                                                     |
| Distance           | 0.799                                                                               | 0.816                                                                               | 0.827                                                                               |
| Reference          | 28ZPAK-;125;72                                                                      | 28ZPAK-;92;72                                                                       | 28ZPAK-;73;72                                                                       |

## Model Applicability

Unknown features are fingerprint features in the query molecule, but not found or appearing too infrequently in the training set.

- All properties and OPS components are within expected ranges.

## Feature Contribution

### Top features for positive contribution

| Fingerprint | Bit/Smiles  | Feature Structure                                                                                                                        | Score | Moderate_Severe in training set |
|-------------|-------------|------------------------------------------------------------------------------------------------------------------------------------------|-------|---------------------------------|
| FCFP_10     | -1695756380 | 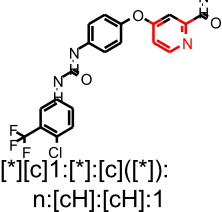<br><chem>[*][c]1:[*]:[c]([*]):n:[cH]:[cH]:1</chem> | 0.285 | 10 out of 11                    |

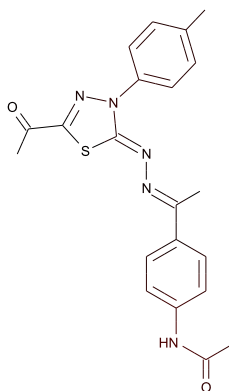

$C_{21}H_{21}N_5O_2S$

Molecular Weight: 407.48873

ALogP: 3.566

Rotatable Bonds: 5

Acceptors: 7

Donors: 1

## Model Prediction

**Prediction: Irritant**

Probability: 1

Enrichment: 1.18

Bayesian Score: 3.01

Mahalanobis Distance: 7.67

Mahalanobis Distance p-value: 0.972

Prediction: Positive if the Bayesian score is above the estimated best cutoff value from minimizing the false positive and false negative rate.

Probability: The estimated probability that the sample is in the positive category. This assumes that the Bayesian score follows a normal distribution and is different from the prediction using a cutoff.

Enrichment: An estimate of enrichment, that is, the increased likelihood (versus random) of this sample being in the category.

Bayesian Score: The standard Laplacian-modified Bayesian score.

Mahalanobis Distance: The Mahalanobis distance (MD) is the distance to the center of the training data. The larger the MD, the less trustworthy the prediction.

Mahalanobis Distance p-value: The p-value gives the fraction of training data with an MD greater than or equal to the one for the given sample, assuming normally distributed data. The smaller the p-value, the less trustworthy the prediction. For highly non-normal X properties (e.g., fingerprints), the MD p-value is wildly inaccurate.

## Structural Similar Compounds

| Name               | COLCHICINE       | ANTHRAQUINONE; 1;1'-IMINODI- | 1;8;9-ANTHRACENETRIOL; TRIACETATE |
|--------------------|------------------|------------------------------|-----------------------------------|
| Structure          |                  |                              |                                   |
| Actual Endpoint    | Irritant         | Irritant                     | Irritant                          |
| Predicted Endpoint | Irritant         | Irritant                     | Irritant                          |
| Distance           | 0.611            | 0.725                        | 0.736                             |
| Reference          | AJOPAA 31;837;48 | 28ZPAK-;125;72               | BJOPAL 53;819;69                  |

## Model Applicability

Unknown features are fingerprint features in the query molecule, but not found or appearing too infrequently in the training set.

1. All properties and OPS components are within expected ranges.

## Feature Contribution

### Top features for positive contribution

| Fingerprint | Bit/Smiles | Feature Structure                  | Score | Irritant in training set |
|-------------|------------|------------------------------------|-------|--------------------------|
| FCFP_12     | 1175665944 | <br>[*]:[cH]:[c](NC(=O)C):[cH]:[*] | 0.198 | 14 out of 14             |

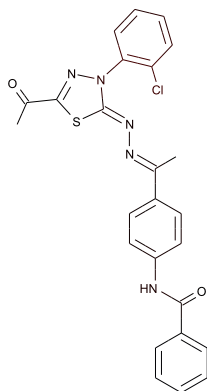

$C_{25}H_{20}ClN_5O_2S$

Molecular Weight: 489.97659

ALogP: 5.409

Rotatable Bonds: 6

Acceptors: 7

Donors: 1

## Model Prediction

**Prediction: Irritant**

Probability: 1

Enrichment: 1.18

Bayesian Score: 1.99

Mahalanobis Distance: 7.96

Mahalanobis Distance p-value: 0.933

Prediction: Positive if the Bayesian score is above the estimated best cutoff value from minimizing the false positive and false negative rate.

Probability: The estimated probability that the sample is in the positive category. This assumes that the Bayesian score follows a normal distribution and is different from the prediction using a cutoff.

Enrichment: An estimate of enrichment, that is, the increased likelihood (versus random) of this sample being in the category.

Bayesian Score: The standard Laplacian-modified Bayesian score.

Mahalanobis Distance: The Mahalanobis distance (MD) is the distance to the center of the training data. The larger the MD, the less trustworthy the prediction.

Mahalanobis Distance p-value: The p-value gives the fraction of training data with an MD greater than or equal to the one for the given sample, assuming normally distributed data. The smaller the p-value, the less trustworthy the prediction. For highly non-normal X properties (e.g., fingerprints), the MD p-value is wildly inaccurate.

## Structural Similar Compounds

| Name               | ANTHRAQUINONE; 1;1'-IMINODI- | 1-BENZOYLAMINO-4-METHOXY-5-CHLORANTHRAQUINONE | BENZANILIDE;2';2'''-DITHIOBIS- |
|--------------------|------------------------------|-----------------------------------------------|--------------------------------|
| Structure          |                              |                                               |                                |
| Actual Endpoint    | Irritant                     | Irritant                                      | Non-Irritant                   |
| Predicted Endpoint | Irritant                     | Irritant                                      | Non-Irritant                   |
| Distance           | 0.689                        | 0.752                                         | 0.766                          |
| Reference          | 28ZPAK-;125;72               | 28ZPAK-;90;72                                 | 28ZPAK-;173;72                 |

## Model Applicability

Unknown features are fingerprint features in the query molecule, but not found or appearing too infrequently in the training set.

- All properties and OPS components are within expected ranges.

## Feature Contribution

### Top features for positive contribution

| Fingerprint | Bit/Smiles | Feature Structure                          | Score | Irritant in training set |
|-------------|------------|--------------------------------------------|-------|--------------------------|
| FCFP_12     | -62776068  | <br>[*]N[*][c]1:[cH]:[*]:[cH]:[cH]:[c]:1Cl | 0.197 | 13 out of 13             |

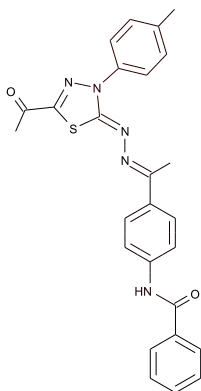

$C_{26}H_{23}N_5O_2S$

Molecular Weight: 469.55811

ALogP: 5.231

Rotatable Bonds: 6

Acceptors: 7

Donors: 1

## Model Prediction

**Prediction: Irritant**

Probability: 1

Enrichment: 1.18

Bayesian Score: 1.48

Mahalanobis Distance: 7.87

Mahalanobis Distance p-value: 0.948

Prediction: Positive if the Bayesian score is above the estimated best cutoff value from minimizing the false positive and false negative rate.

Probability: The estimated probability that the sample is in the positive category. This assumes that the Bayesian score follows a normal distribution and is different from the prediction using a cutoff.

Enrichment: An estimate of enrichment, that is, the increased likelihood (versus random) of this sample being in the category.

Bayesian Score: The standard Laplacian-modified Bayesian score.

Mahalanobis Distance: The Mahalanobis distance (MD) is the distance to the center of the training data. The larger the MD, the less trustworthy the prediction.

Mahalanobis Distance p-value: The p-value gives the fraction of training data with an MD greater than or equal to the one for the given sample, assuming normally distributed data. The smaller the p-value, the less trustworthy the prediction. For highly non-normal X properties (e.g., fingerprints), the MD p-value is wildly inaccurate.

## Structural Similar Compounds

| Name               | ANTHRAQUINONE; 1;1'-IMINODI- | 1-BENZOYLAMINO-4-METHOXY-5-CHLORANTHRAQUINONE | COLCHICINE       |
|--------------------|------------------------------|-----------------------------------------------|------------------|
| Structure          |                              |                                               |                  |
| Actual Endpoint    | Irritant                     | Irritant                                      | Irritant         |
| Predicted Endpoint | Irritant                     | Irritant                                      | Irritant         |
| Distance           | 0.677                        | 0.748                                         | 0.766            |
| Reference          | 28ZPAK-;125;72               | 28ZPAK-;90;72                                 | AJOPAA 31;837;48 |

## Model Applicability

Unknown features are fingerprint features in the query molecule, but not found or appearing too infrequently in the training set.

1. All properties and OPS components are within expected ranges.

## Feature Contribution

### Top features for positive contribution

| Fingerprint | Bit/Smiles | Feature Structure                 | Score | Irritant in training set |
|-------------|------------|-----------------------------------|-------|--------------------------|
| FCFP_12     | 675799546  | <br>[*]=C1[*][*]=NN1[C](:[*]):[*] | 0.184 | 7 out of 7               |



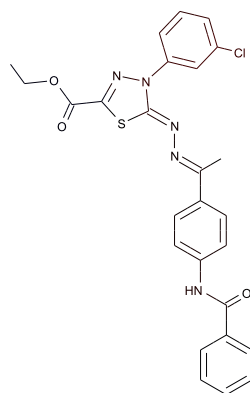

C<sub>26</sub>H<sub>22</sub>ClN<sub>5</sub>O<sub>3</sub>S

Molecular Weight: 520.00258

ALogP: 5.883

Rotatable Bonds: 8

Acceptors: 8

Donors: 1

## Model Prediction

**Prediction: Irritant**

Probability: 1

Enrichment: 1.18

Bayesian Score: 1.6

Mahalanobis Distance: 9.15

Mahalanobis Distance p-value: 0.431

Prediction: Positive if the Bayesian score is above the estimated best cutoff value from minimizing the false positive and false negative rate.

Probability: The estimated probability that the sample is in the positive category. This assumes that the Bayesian score follows a normal distribution and is different from the prediction using a cutoff.

Enrichment: An estimate of enrichment, that is, the increased likelihood (versus random) of this sample being in the category.

Bayesian Score: The standard Laplacian-modified Bayesian score.

Mahalanobis Distance: The Mahalanobis distance (MD) is the distance to the center of the training data. The larger the MD, the less trustworthy the prediction.

Mahalanobis Distance p-value: The p-value gives the fraction of training data with an MD greater than or equal to the one for the given sample, assuming normally distributed data. The smaller the p-value, the less trustworthy the prediction. For highly non-normal X properties (e.g., fingerprints), the MD p-value is wildly inaccurate.

## Structural Similar Compounds

| Name               | ANTHRAQUINONE; 1;1'-IMINODI- | Anthraquinone; 1;1'-(anthraquinon-1;5-ylenediimino)di-                 | Anthraquinone; 1;1'-(anthraquinon-1;4-ylenediimino)di-                 |
|--------------------|------------------------------|------------------------------------------------------------------------|------------------------------------------------------------------------|
| Structure          |                              |                                                                        |                                                                        |
| Actual Endpoint    | Irritant                     | Irritant                                                               | Irritant                                                               |
| Predicted Endpoint | Irritant                     | Irritant                                                               | Irritant                                                               |
| Distance           | 0.810                        | 0.837                                                                  | 0.838                                                                  |
| Reference          | 28ZPAK-;125;72               | Prehled Prumyslove Toxikologie; Organicke Latky; Marhold; J. pp 736;86 | Prehled Prumyslove Toxikologie; Organicke Latky; Marhold; J. pp 736;86 |

## Model Applicability

Unknown features are fingerprint features in the query molecule, but not found or appearing too infrequently in the training set.

- All properties and OPS components are within expected ranges.

## Feature Contribution

### Top features for positive contribution

| Fingerprint | Bit/Smiles | Feature Structure                              | Score | Irritant in training set |
|-------------|------------|------------------------------------------------|-------|--------------------------|
| FCFP_12     | 675799546  | <br><chem>[*]=C1[*][*]=NN1[C]([*])([*])</chem> | 0.184 | 7 out of 7               |

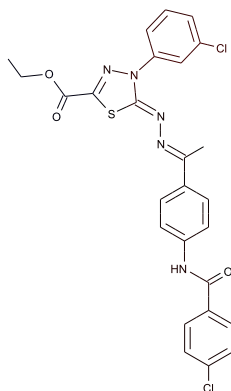

$C_{26}H_{21}Cl_2N_5O_3S$

Molecular Weight: 554.44763

ALogP: 6.547

Rotatable Bonds: 8

Acceptors: 8

Donors: 1

## Model Prediction

**Prediction: Irritant**

Probability: 1

Enrichment: 1.18

Bayesian Score: 2.09

Mahalanobis Distance: 9.37

Mahalanobis Distance p-value: 0.317

Prediction: Positive if the Bayesian score is above the estimated best cutoff value from minimizing the false positive and false negative rate.

Probability: The estimated probability that the sample is in the positive category. This assumes that the Bayesian score follows a normal distribution and is different from the prediction using a cutoff.

Enrichment: An estimate of enrichment, that is, the increased likelihood (versus random) of this sample being in the category.

Bayesian Score: The standard Laplacian-modified Bayesian score.

Mahalanobis Distance: The Mahalanobis distance (MD) is the distance to the center of the training data. The larger the MD, the less trustworthy the prediction.

Mahalanobis Distance p-value: The p-value gives the fraction of training data with an MD greater than or equal to the one for the given sample, assuming normally distributed data. The smaller the p-value, the less trustworthy the prediction. For highly non-normal X properties (e.g., fingerprints), the MD p-value is wildly inaccurate.

## Structural Similar Compounds

| Name               | Anthraquinone; 1;1'-(anthraquinon-1;5-ylenediimino)di-                 | Anthraquinone; 1;1'-(anthraquinon-1;4-ylenediimino)di-                 | ANILINE;N;N'-1;4-ANTHRAQUINONYLENEBIS(4-PHENOXY)- |
|--------------------|------------------------------------------------------------------------|------------------------------------------------------------------------|---------------------------------------------------|
| Structure          |                                                                        |                                                                        |                                                   |
| Actual Endpoint    | Irritant                                                               | Irritant                                                               | Non-Irritant                                      |
| Predicted Endpoint | Irritant                                                               | Irritant                                                               | Non-Irritant                                      |
| Distance           | 0.785                                                                  | 0.786                                                                  | 0.849                                             |
| Reference          | Prehled Prumyslove Toxikologie; Organicke Latky; Marhold; J. pp 736;86 | Prehled Prumyslove Toxikologie; Organicke Latky; Marhold; J. pp 736;86 | 28ZPAK-;114;72                                    |

## Model Applicability

Unknown features are fingerprint features in the query molecule, but not found or appearing too infrequently in the training set.

1. All properties and OPS components are within expected ranges.

## Feature Contribution

### Top features for positive contribution

| Fingerprint | Bit/Smiles  | Feature Structure                             | Score | Irritant in training set |
|-------------|-------------|-----------------------------------------------|-------|--------------------------|
| FCFP_12     | -1508180856 | <br>[*][c]1:[cH]:[cH]:[c]<br>(Cl):[cH]:[cH]:1 | 0.2   | 17 out of 17             |

# Sorafenib

# TOPKAT\_Ocular\_Irritancy\_None\_vs\_Irritant

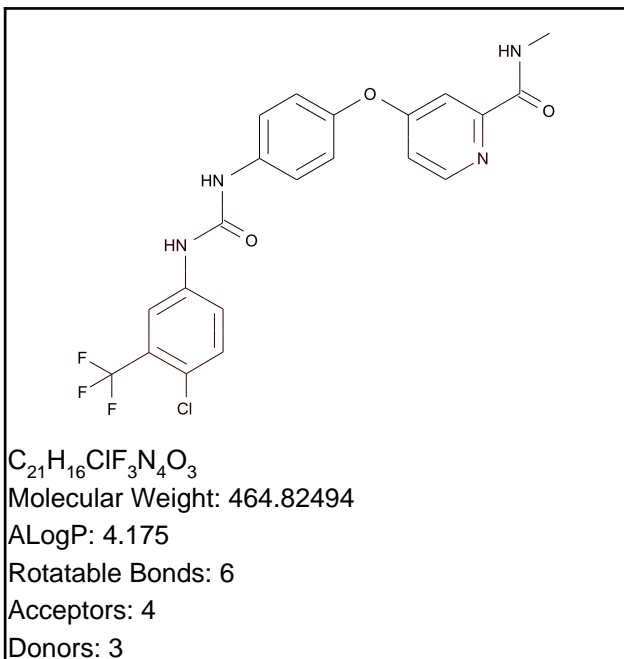

## Model Prediction

**Prediction: Irritant**

Probability: 1

Enrichment: 1.18

Bayesian Score: 3.04

Mahalanobis Distance: 6.28

Mahalanobis Distance p-value: 1

Prediction: Positive if the Bayesian score is above the estimated best cutoff value from minimizing the false positive and false negative rate.

Probability: The estimated probability that the sample is in the positive category. This assumes that the Bayesian score follows a normal distribution and is different from the prediction using a cutoff.

Enrichment: An estimate of enrichment, that is, the increased likelihood (versus random) of this sample being in the category.

Bayesian Score: The standard Laplacian-modified Bayesian score.

Mahalanobis Distance: The Mahalanobis distance (MD) is the distance to the center of the training data. The larger the MD, the less trustworthy the prediction.

Mahalanobis Distance p-value: The p-value gives the fraction of training data with an MD greater than or equal to the one for the given sample, assuming normally distributed data. The smaller the p-value, the less trustworthy the prediction. For highly non-normal X properties (e.g., fingerprints), the MD p-value is wildly inaccurate.

## Structural Similar Compounds

| Name               | BENZANILIDE;2';2'''-DITHIOBIS-                                                      | 4;4'-DIAMINO-1;1'-DIANTHRIMIDE                                                      | 5-NORBORNENE-2;3-DICARBOXYLIC ACID; 1;4;5;6;7;7'-HEXACHLORO-                        |
|--------------------|-------------------------------------------------------------------------------------|-------------------------------------------------------------------------------------|-------------------------------------------------------------------------------------|
| Structure          | 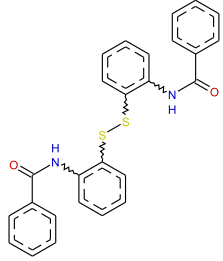 |  |  |
| Actual Endpoint    | Non-Irritant                                                                        | Irritant                                                                            | Irritant                                                                            |
| Predicted Endpoint | Non-Irritant                                                                        | Irritant                                                                            | Irritant                                                                            |
| Distance           | 0.743                                                                               | 0.791                                                                               | 0.801                                                                               |
| Reference          | 28ZPAK-;173;72                                                                      | 28ZPAK-;125;72                                                                      | 28ZPAK-;92;72                                                                       |

## Model Applicability

Unknown features are fingerprint features in the query molecule, but not found or appearing too infrequently in the training set.

- All properties and OPS components are within expected ranges.

## Feature Contribution

### Top features for positive contribution

| Fingerprint | Bit/Smiles | Feature Structure                                                                                                | Score | Irritant in training set |
|-------------|------------|------------------------------------------------------------------------------------------------------------------|-------|--------------------------|
| FCFP_12     | 1747237384 | 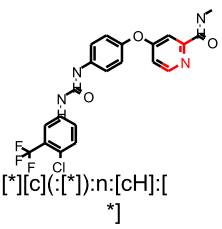<br>[*][c](:[*]):n:[cH]:[*] | 0.208 | 44 out of 44             |

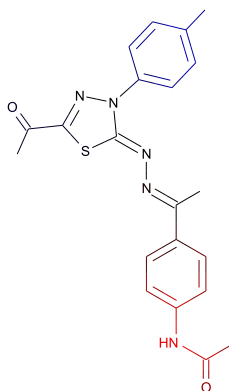

$C_{21}H_{21}N_5O_2S$

Molecular Weight: 407.48873

ALogP: 3.566

Rotatable Bonds: 5

Acceptors: 7

Donors: 1

## Model Prediction

**Prediction: Carcinogen**

Probability: 0.323

Enrichment: 1

Bayesian Score: 1.15

Mahalanobis Distance: 10.3

Mahalanobis Distance p-value: 0.246

Prediction: Positive if the Bayesian score is above the estimated best cutoff value from minimizing the false positive and false negative rate.

Probability: The estimated probability that the sample is in the positive category. This assumes that the Bayesian score follows a normal distribution and is different from the prediction using a cutoff.

Enrichment: An estimate of enrichment, that is, the increased likelihood (versus random) of this sample being in the category.

Bayesian Score: The standard Laplacian-modified Bayesian score.

Mahalanobis Distance: The Mahalanobis distance (MD) is the distance to the center of the training data. The larger the MD, the less trustworthy the prediction.

Mahalanobis Distance p-value: The p-value gives the fraction of training data with an MD greater than or equal to the one for the given sample, assuming normally distributed data. The smaller the p-value, the less trustworthy the prediction. For highly non-normal X properties (e.g., fingerprints), the MD p-value is wildly inaccurate.

## Structural Similar Compounds

| Name               | Nisoldipine                                                         | Isradipine                                                          | Moricizine                                                          |
|--------------------|---------------------------------------------------------------------|---------------------------------------------------------------------|---------------------------------------------------------------------|
| Structure          |                                                                     |                                                                     |                                                                     |
| Actual Endpoint    | Non-Carcinogen                                                      | Non-Carcinogen                                                      | Carcinogen                                                          |
| Predicted Endpoint | Non-Carcinogen                                                      | Non-Carcinogen                                                      | Carcinogen                                                          |
| Distance           | 0.574                                                               | 0.580                                                               | 0.597                                                               |
| Reference          | US FDA (Centre for Drug Eval.& Res./Off. Testing & Res.) Sept. 1997 | US FDA (Centre for Drug Eval.& Res./Off. Testing & Res.) Sept. 1997 | US FDA (Centre for Drug Eval.& Res./Off. Testing & Res.) Sept. 1997 |

## Model Applicability

Unknown features are fingerprint features in the query molecule, but not found or appearing too infrequently in the training set.

1. All properties and OPS components are within expected ranges.
2. Unknown ECFP\_2 feature: 128986386: [\*]N=C(/C)\[c](:[\*]):[\*]
3. Unknown ECFP\_2 feature: 562081661: [\*]C(=NN=[\*])[\*]
4. Unknown ECFP\_2 feature: -819426257: [\*]C(=NN=[\*])[\*]
5. Unknown ECFP\_2 feature: 189949281: [\*]N=C\1/S[\*]=[\*]N1[\*]
6. Unknown ECFP\_2 feature: -934225701: [\*]C(=[\*])C1=N[\*][\*]S1
7. Unknown ECFP\_2 feature: -1110911409: [\*]=C1[\*][\*]=NN1[c](:[\*]):[\*]

## Feature Contribution

### Top features for positive contribution

| Fingerprint | Bit/Smiles | Feature Structure | Score | Carcinogen in training set |
|-------------|------------|-------------------|-------|----------------------------|
|             |            |                   |       |                            |

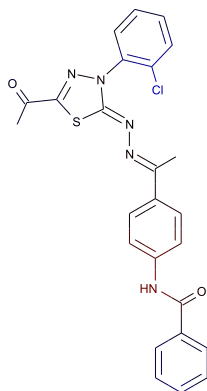

$C_{25}H_{20}ClN_5O_2S$

Molecular Weight: 489.97659

ALogP: 5.409

Rotatable Bonds: 6

Acceptors: 7

Donors: 1

## Model Prediction

Prediction: Non-Carcinogen

Probability: 0.232

Enrichment: 0.721

Bayesian Score: -4.08

Mahalanobis Distance: 11.6

Mahalanobis Distance p-value: 0.0148

Prediction: Positive if the Bayesian score is above the estimated best cutoff value from minimizing the false positive and false negative rate.

Probability: The estimated probability that the sample is in the positive category. This assumes that the Bayesian score follows a normal distribution and is different from the prediction using a cutoff.

Enrichment: An estimate of enrichment, that is, the increased likelihood (versus random) of this sample being in the category.

Bayesian Score: The standard Laplacian-modified Bayesian score.

Mahalanobis Distance: The Mahalanobis distance (MD) is the distance to the center of the training data. The larger the MD, the less trustworthy the prediction.

Mahalanobis Distance p-value: The p-value gives the fraction of training data with an MD greater than or equal to the one for the given sample, assuming normally distributed data. The smaller the p-value, the less trustworthy the prediction. For highly non-normal X properties (e.g., fingerprints), the MD p-value is wildly inaccurate.

## Structural Similar Compounds

| Name               | Emetine                                                             | Carbenicillin                                                       | Moricizine                                                          |
|--------------------|---------------------------------------------------------------------|---------------------------------------------------------------------|---------------------------------------------------------------------|
| Structure          |                                                                     |                                                                     |                                                                     |
| Actual Endpoint    | Non-Carcinogen                                                      | Non-Carcinogen                                                      | Carcinogen                                                          |
| Predicted Endpoint | Non-Carcinogen                                                      | Non-Carcinogen                                                      | Carcinogen                                                          |
| Distance           | 0.698                                                               | 0.710                                                               | 0.717                                                               |
| Reference          | US FDA (Centre for Drug Eval.& Res./Off. Testing & Res.) Sept. 1997 | US FDA (Centre for Drug Eval.& Res./Off. Testing & Res.) Sept. 1997 | US FDA (Centre for Drug Eval.& Res./Off. Testing & Res.) Sept. 1997 |

## Model Applicability

Unknown features are fingerprint features in the query molecule, but not found or appearing too infrequently in the training set.

1. All properties and OPS components are within expected ranges.
2. Unknown ECFP\_2 feature: 128986386: [\*]N=C(/C)\[c](:[\*]):[\*]
3. Unknown ECFP\_2 feature: 562081661: [\*]C(=NN=[\*])[\*]
4. Unknown ECFP\_2 feature: -819426257: [\*]C(=NN=[\*])[\*]
5. Unknown ECFP\_2 feature: 189949281: [\*]N=C\1/S[\*]=[\*]N1[\*]
6. Unknown ECFP\_2 feature: -934225701: [\*]C(=[\*])C1=N[\*][\*]S1
7. Unknown ECFP\_2 feature: -1110911409: [\*]=C1[\*][\*]=NN1[c](:[\*]):[\*]

## Feature Contribution

### Top features for positive contribution

| Fingerprint | Bit/Smiles | Feature Structure | Score | Carcinogen in training set |
|-------------|------------|-------------------|-------|----------------------------|
|             |            |                   |       |                            |

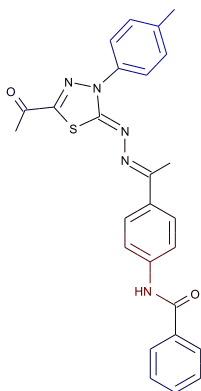

$C_{26}H_{23}N_5O_2S$

Molecular Weight: 469.55811

ALogP: 5.231

Rotatable Bonds: 6

Acceptors: 7

Donors: 1

## Model Prediction

Prediction: Non-Carcinogen

Probability: 0.236

Enrichment: 0.732

Bayesian Score: -3.8

Mahalanobis Distance: 11.3

Mahalanobis Distance p-value: 0.0374

Prediction: Positive if the Bayesian score is above the estimated best cutoff value from minimizing the false positive and false negative rate.

Probability: The estimated probability that the sample is in the positive category. This assumes that the Bayesian score follows a normal distribution and is different from the prediction using a cutoff.

Enrichment: An estimate of enrichment, that is, the increased likelihood (versus random) of this sample being in the category.

Bayesian Score: The standard Laplacian-modified Bayesian score.

Mahalanobis Distance: The Mahalanobis distance (MD) is the distance to the center of the training data. The larger the MD, the less trustworthy the prediction.

Mahalanobis Distance p-value: The p-value gives the fraction of training data with an MD greater than or equal to the one for the given sample, assuming normally distributed data. The smaller the p-value, the less trustworthy the prediction. For highly non-normal X properties (e.g., fingerprints), the MD p-value is wildly inaccurate.

## Structural Similar Compounds

| Name               | Emetine                                                             | Moricizine                                                          | Carbenicillin                                                       |
|--------------------|---------------------------------------------------------------------|---------------------------------------------------------------------|---------------------------------------------------------------------|
| Structure          |                                                                     |                                                                     |                                                                     |
| Actual Endpoint    | Non-Carcinogen                                                      | Carcinogen                                                          | Non-Carcinogen                                                      |
| Predicted Endpoint | Non-Carcinogen                                                      | Carcinogen                                                          | Non-Carcinogen                                                      |
| Distance           | 0.696                                                               | 0.697                                                               | 0.703                                                               |
| Reference          | US FDA (Centre for Drug Eval.& Res./Off. Testing & Res.) Sept. 1997 | US FDA (Centre for Drug Eval.& Res./Off. Testing & Res.) Sept. 1997 | US FDA (Centre for Drug Eval.& Res./Off. Testing & Res.) Sept. 1997 |

## Model Applicability

Unknown features are fingerprint features in the query molecule, but not found or appearing too infrequently in the training set.

1. All properties and OPS components are within expected ranges.
2. Unknown ECFP\_2 feature: 128986386: [\*]N=C(/C)\[c](:[\*]):[\*]
3. Unknown ECFP\_2 feature: 562081661: [\*]C(=NN=[\*])[\*]
4. Unknown ECFP\_2 feature: -819426257: [\*]C(=NN=[\*])[\*]
5. Unknown ECFP\_2 feature: 189949281: [\*]N=C\1/S[\*]=[\*]N1[\*]
6. Unknown ECFP\_2 feature: -934225701: [\*]C(=[\*])C1=N[\*][\*]S1
7. Unknown ECFP\_2 feature: -1110911409: [\*]=C1[\*][\*]=NN1[c](:[\*]):[\*]

## Feature Contribution

### Top features for positive contribution

| Fingerprint | Bit/Smiles | Feature Structure | Score | Carcinogen in training set |
|-------------|------------|-------------------|-------|----------------------------|
|             |            |                   |       |                            |

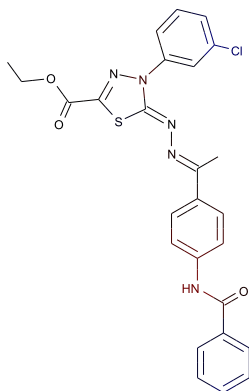

$C_{26}H_{22}ClN_5O_3S$

Molecular Weight: 520.00258

ALogP: 5.883

Rotatable Bonds: 8

Acceptors: 8

Donors: 1

## Model Prediction

Prediction: Non-Carcinogen

Probability: 0.266

Enrichment: 0.827

Bayesian Score: -1.76

Mahalanobis Distance: 18.4

Mahalanobis Distance p-value: 7.3e-017

Prediction: Positive if the Bayesian score is above the estimated best cutoff value from minimizing the false positive and false negative rate.

Probability: The estimated probability that the sample is in the positive category. This assumes that the Bayesian score follows a normal distribution and is different from the prediction using a cutoff.

Enrichment: An estimate of enrichment, that is, the increased likelihood (versus random) of this sample being in the category.

Bayesian Score: The standard Laplacian-modified Bayesian score.

Mahalanobis Distance: The Mahalanobis distance (MD) is the distance to the center of the training data. The larger the MD, the less trustworthy the prediction.

Mahalanobis Distance p-value: The p-value gives the fraction of training data with an MD greater than or equal to the one for the given sample, assuming normally distributed data. The smaller the p-value, the less trustworthy the prediction. For highly non-normal X properties (e.g., fingerprints), the MD p-value is wildly inaccurate.

## Structural Similar Compounds

| Name               | Deserpidine                                                         | Nicardipine                                                         | Reserpine                                                           |
|--------------------|---------------------------------------------------------------------|---------------------------------------------------------------------|---------------------------------------------------------------------|
| Structure          |                                                                     |                                                                     |                                                                     |
| Actual Endpoint    | Carcinogen                                                          | Carcinogen                                                          | Carcinogen                                                          |
| Predicted Endpoint | Carcinogen                                                          | Carcinogen                                                          | Carcinogen                                                          |
| Distance           | 0.618                                                               | 0.689                                                               | 0.708                                                               |
| Reference          | US FDA (Centre for Drug Eval.& Res./Off. Testing & Res.) Sept. 1997 | US FDA (Centre for Drug Eval.& Res./Off. Testing & Res.) Sept. 1997 | US FDA (Centre for Drug Eval.& Res./Off. Testing & Res.) Sept. 1997 |

## Model Applicability

Unknown features are fingerprint features in the query molecule, but not found or appearing too infrequently in the training set.

1. All properties and OPS components are within expected ranges.
2. Unknown ECFP\_2 feature: 128986386: [\*]N=C(/C)\[c](:[\*]):[\*]
3. Unknown ECFP\_2 feature: 562081661: [\*]C(=NN=[\*])[\*]
4. Unknown ECFP\_2 feature: -819426257: [\*]C(=NN=[\*])[\*]
5. Unknown ECFP\_2 feature: 189949281: [\*]N=C\1/S[\*]=[\*]N1[\*]
6. Unknown ECFP\_2 feature: -934225701: [\*]C(=[\*])C1=N[\*][\*]S1
7. Unknown ECFP\_2 feature: -1110911409: [\*]=C1[\*][\*]=NN1[c](:[\*]):[\*]

## Feature Contribution

### Top features for positive contribution

| Fingerprint | Bit/Smiles | Feature Structure | Score | Carcinogen in training set |
|-------------|------------|-------------------|-------|----------------------------|
|             |            |                   |       |                            |



21b

TOPKAT\_Rat\_Female\_FDA\_None\_vs\_Carcinogen

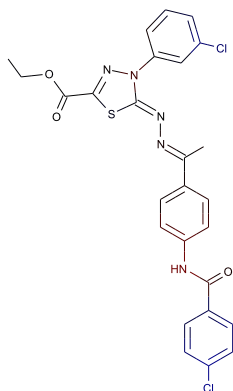C<sub>26</sub>H<sub>21</sub>Cl<sub>2</sub>N<sub>5</sub>O<sub>3</sub>S

Molecular Weight: 554.44763

ALogP: 6.547

Rotatable Bonds: 8

Acceptors: 8

Donors: 1

## Model Prediction

Prediction: Non-Carcinogen

Probability: 0.251

Enrichment: 0.779

Bayesian Score: -2.73

Mahalanobis Distance: 12.6

Mahalanobis Distance p-value: 0.000622

Prediction: Positive if the Bayesian score is above the estimated best cutoff value from minimizing the false positive and false negative rate.

Probability: The estimated probability that the sample is in the positive category. This assumes that the Bayesian score follows a normal distribution and is different from the prediction using a cutoff.

Enrichment: An estimate of enrichment, that is, the increased likelihood (versus random) of this sample being in the category.

Bayesian Score: The standard Laplacian-modified Bayesian score.

Mahalanobis Distance: The Mahalanobis distance (MD) is the distance to the center of the training data. The larger the MD, the less trustworthy the prediction.

Mahalanobis Distance p-value: The p-value gives the fraction of training data with an MD greater than or equal to the one for the given sample, assuming normally distributed data. The smaller the p-value, the less trustworthy the prediction. For highly non-normal X properties (e.g., fingerprints), the MD p-value is wildly inaccurate.

## Structural Similar Compounds

| Name               | Deserpidine                                                         | Reserpine                                                           | Nicardipine                                                         |
|--------------------|---------------------------------------------------------------------|---------------------------------------------------------------------|---------------------------------------------------------------------|
| Structure          |                                                                     |                                                                     |                                                                     |
| Actual Endpoint    | Carcinogen                                                          | Carcinogen                                                          | Carcinogen                                                          |
| Predicted Endpoint | Carcinogen                                                          | Carcinogen                                                          | Carcinogen                                                          |
| Distance           | 0.612                                                               | 0.690                                                               | 0.768                                                               |
| Reference          | US FDA (Centre for Drug Eval.& Res./Off. Testing & Res.) Sept. 1997 | US FDA (Centre for Drug Eval.& Res./Off. Testing & Res.) Sept. 1997 | US FDA (Centre for Drug Eval.& Res./Off. Testing & Res.) Sept. 1997 |

## Model Applicability

Unknown features are fingerprint features in the query molecule, but not found or appearing too infrequently in the training set.

1. All properties and OPS components are within expected ranges.
2. Unknown ECFP\_2 feature: 128986386: [\*]N=C(/C)\[c](:[\*]):[\*]
3. Unknown ECFP\_2 feature: 562081661: [\*]C(=NN=[\*])[\*]
4. Unknown ECFP\_2 feature: -819426257: [\*]C(=NN=[\*])[\*]
5. Unknown ECFP\_2 feature: 189949281: [\*]N=C\1/S[\*]=[\*]N1[\*]
6. Unknown ECFP\_2 feature: -934225701: [\*]C(=[\*])C1=N[\*][\*]S1
7. Unknown ECFP\_2 feature: -1110911409: [\*]=C1[\*][\*]=NN1[c](:[\*]):[\*]

## Feature Contribution

### Top features for positive contribution

| Fingerprint | Bit/Smiles | Feature Structure | Score | Carcinogen in training set |
|-------------|------------|-------------------|-------|----------------------------|
|             |            |                   |       |                            |



# Sorafenib

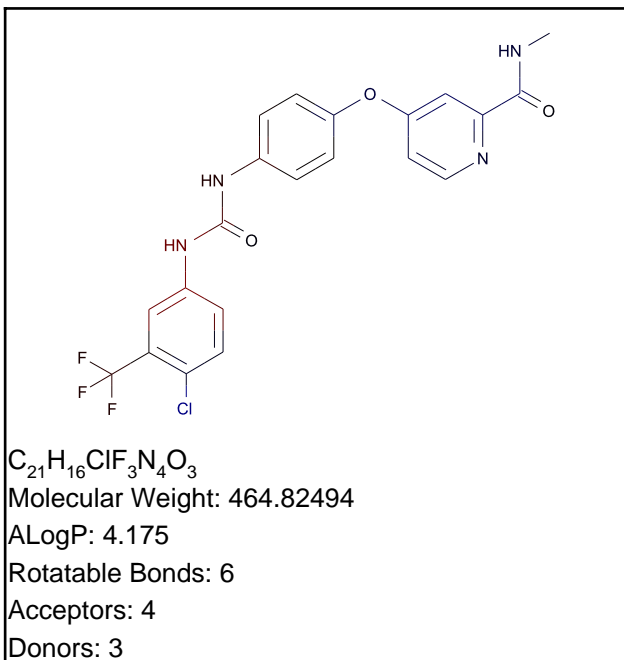

## Model Prediction

Prediction: Non-Carcinogen

Probability: 0.236

Enrichment: 0.734

Bayesian Score: -3.76

Mahalanobis Distance: 12.2

Mahalanobis Distance p-value: 0.00229

Prediction: Positive if the Bayesian score is above the estimated best cutoff value from minimizing the false positive and false negative rate.

Probability: The estimated probability that the sample is in the positive category. This assumes that the Bayesian score follows a normal distribution and is different from the prediction using a cutoff.

Enrichment: An estimate of enrichment, that is, the increased likelihood (versus random) of this sample being in the category.

Bayesian Score: The standard Laplacian-modified Bayesian score.

Mahalanobis Distance: The Mahalanobis distance (MD) is the distance to the center of the training data. The larger the MD, the less trustworthy the prediction.

Mahalanobis Distance p-value: The p-value gives the fraction of training data with an MD greater than or equal to the one for the given sample, assuming normally distributed data. The smaller the p-value, the less trustworthy the prediction. For highly non-normal X properties (e.g., fingerprints), the MD p-value is wildly inaccurate.

# TOPKAT\_Rat\_Female\_FDA\_None\_vs\_Carcinogen

## Structural Similar Compounds

| Name               | Glimepiride                                                                         | Glyburide                                                                           | Fluvastatin                                                                         |
|--------------------|-------------------------------------------------------------------------------------|-------------------------------------------------------------------------------------|-------------------------------------------------------------------------------------|
| Structure          | 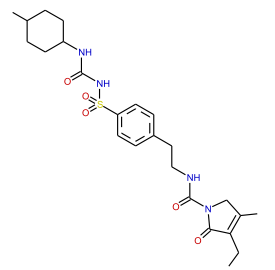 |  |  |
| Actual Endpoint    | Non-Carcinogen                                                                      | Non-Carcinogen                                                                      | Non-Carcinogen                                                                      |
| Predicted Endpoint | Non-Carcinogen                                                                      | Non-Carcinogen                                                                      | Non-Carcinogen                                                                      |
| Distance           | 0.620                                                                               | 0.635                                                                               | 0.635                                                                               |
| Reference          | US FDA (Centre for Drug Eval.& Res./Off. Testing & Res.) Sept. 1997                 | US FDA (Centre for Drug Eval.& Res./Off. Testing & Res.) Sept. 1997                 | US FDA (Centre for Drug Eval.& Res./Off. Testing & Res.) Sept. 1997                 |

## Model Applicability

Unknown features are fingerprint features in the query molecule, but not found or appearing too infrequently in the training set.

- All properties and OPS components are within expected ranges.

## Feature Contribution

### Top features for positive contribution

| Fingerprint | Bit/Smiles | Feature Structure                                                                                                                                            | Score | Carcinogen in training set |
|-------------|------------|--------------------------------------------------------------------------------------------------------------------------------------------------------------|-------|----------------------------|
| ECFP_12     | -970385855 | 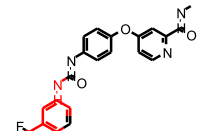<br><chem>[*]N(c1cc2cc(F)ccc2n1)[cH]:[*]:[c]([*]):[c]([*])C(=O)N</chem> | 0.613 | 2 out of 2                 |

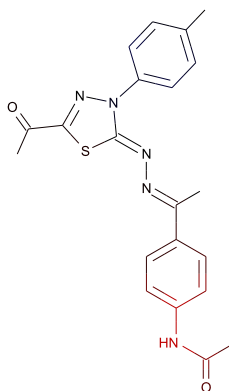

$C_{21}H_{21}N_5O_2S$

Molecular Weight: 407.48873

ALogP: 3.566

Rotatable Bonds: 5

Acceptors: 7

Donors: 1

## Model Prediction

**Prediction: Multiple-Carcinogen**

Probability: 0.687

Enrichment: 1.84

Bayesian Score: 5.17

Mahalanobis Distance: 14.3

Mahalanobis Distance p-value: 1.38e-005

Prediction: Positive if the Bayesian score is above the estimated best cutoff value from minimizing the false positive and false negative rate.

Probability: The estimated probability that the sample is in the positive category. This assumes that the Bayesian score follows a normal distribution and is different from the prediction using a cutoff.

Enrichment: An estimate of enrichment, that is, the increased likelihood (versus random) of this sample being in the category.

Bayesian Score: The standard Laplacian-modified Bayesian score.

Mahalanobis Distance: The Mahalanobis distance (MD) is the distance to the center of the training data. The larger the MD, the less trustworthy the prediction.

Mahalanobis Distance p-value: The p-value gives the fraction of training data with an MD greater than or equal to the one for the given sample, assuming normally distributed data. The smaller the p-value, the less trustworthy the prediction. For highly non-normal X properties (e.g., fingerprints), the MD p-value is wildly inaccurate.

## Structural Similar Compounds

| Name               | Moricizine                                                          | Diltiazem                                                           | Omeprazole                                                          |
|--------------------|---------------------------------------------------------------------|---------------------------------------------------------------------|---------------------------------------------------------------------|
| Structure          |                                                                     |                                                                     |                                                                     |
| Actual Endpoint    | Single-Carcinogen                                                   | Multiple-Carcinogen                                                 | Multiple-Carcinogen                                                 |
| Predicted Endpoint | Single-Carcinogen                                                   | Multiple-Carcinogen                                                 | Multiple-Carcinogen                                                 |
| Distance           | 0.552                                                               | 0.669                                                               | 0.695                                                               |
| Reference          | US FDA (Centre for Drug Eval.& Res./Off. Testing & Res.) Sept. 1997 | US FDA (Centre for Drug Eval.& Res./Off. Testing & Res.) Sept. 1997 | US FDA (Centre for Drug Eval.& Res./Off. Testing & Res.) Sept. 1997 |

## Model Applicability

Unknown features are fingerprint features in the query molecule, but not found or appearing too infrequently in the training set.

- OPS PC12 out of range. Value: 3.0332. Training min, max, SD, explained variance: -2.8991, 3.0113, 1.313, 0.0255.

## Feature Contribution

### Top features for positive contribution

| Fingerprint | Bit/Smiles | Feature Structure                     | Score | Multiple-Carcinogen in training set |
|-------------|------------|---------------------------------------|-------|-------------------------------------|
| SCFP_4      | 2097618059 | <p>[*]:[cH]:[c](NC(=O)C):[cH]:[*]</p> | 0.73  | 5 out of 6                          |

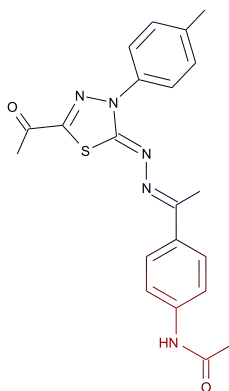

$C_{21}H_{21}N_5O_2S$

Molecular Weight: 407.48873

ALogP: 3.566

Rotatable Bonds: 5

Acceptors: 7

Donors: 1

## Model Prediction

**Prediction: Carcinogen**

Probability: 0.444

Enrichment: 1.33

Bayesian Score: 2.79

Mahalanobis Distance: 13.2

Mahalanobis Distance p-value: 0.000888

Prediction: Positive if the Bayesian score is above the estimated best cutoff value from minimizing the false positive and false negative rate.

Probability: The estimated probability that the sample is in the positive category. This assumes that the Bayesian score follows a normal distribution and is different from the prediction using a cutoff.

Enrichment: An estimate of enrichment, that is, the increased likelihood (versus random) of this sample being in the category.

Bayesian Score: The standard Laplacian-modified Bayesian score.

Mahalanobis Distance: The Mahalanobis distance (MD) is the distance to the center of the training data. The larger the MD, the less trustworthy the prediction.

Mahalanobis Distance p-value: The p-value gives the fraction of training data with an MD greater than or equal to the one for the given sample, assuming normally distributed data. The smaller the p-value, the less trustworthy the prediction. For highly non-normal X properties (e.g., fingerprints), the MD p-value is wildly inaccurate.

## Structural Similar Compounds

| Name               | Moricizine                                                          | Nisoldipine                                                         | Isradipine                                                          |
|--------------------|---------------------------------------------------------------------|---------------------------------------------------------------------|---------------------------------------------------------------------|
| Structure          |                                                                     |                                                                     |                                                                     |
| Actual Endpoint    | Carcinogen                                                          | Non-Carcinogen                                                      | Carcinogen                                                          |
| Predicted Endpoint | Carcinogen                                                          | Carcinogen                                                          | Carcinogen                                                          |
| Distance           | 0.575                                                               | 0.609                                                               | 0.616                                                               |
| Reference          | US FDA (Centre for Drug Eval.& Res./Off. Testing & Res.) Sept. 1997 | US FDA (Centre for Drug Eval.& Res./Off. Testing & Res.) Sept. 1997 | US FDA (Centre for Drug Eval.& Res./Off. Testing & Res.) Sept. 1997 |

## Model Applicability

Unknown features are fingerprint features in the query molecule, but not found or appearing too infrequently in the training set.

1. All properties and OPS components are within expected ranges.

## Feature Contribution

### Top features for positive contribution

| Fingerprint | Bit/Smiles | Feature Structure                                 | Score | Carcinogen in training set |
|-------------|------------|---------------------------------------------------|-------|----------------------------|
| SCFP_6      | 347048986  | <br>[*]C(=[*])N[c]1:[cH]:<br>[cH]:[*]:[cH]:[cH]:1 | 0.615 | 5 out of 7                 |

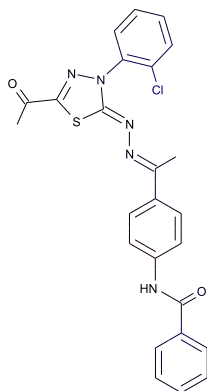

$C_{25}H_{20}ClN_5O_2S$

Molecular Weight: 489.97659

ALogP: 5.409

Rotatable Bonds: 6

Acceptors: 7

Donors: 1

## Model Prediction

Prediction: Non-Carcinogen

Probability: 0.296

Enrichment: 0.886

Bayesian Score: -2.29

Mahalanobis Distance: 15.9

Mahalanobis Distance p-value: 7.31e-009

Prediction: Positive if the Bayesian score is above the estimated best cutoff value from minimizing the false positive and false negative rate.

Probability: The estimated probability that the sample is in the positive category. This assumes that the Bayesian score follows a normal distribution and is different from the prediction using a cutoff.

Enrichment: An estimate of enrichment, that is, the increased likelihood (versus random) of this sample being in the category.

Bayesian Score: The standard Laplacian-modified Bayesian score.

Mahalanobis Distance: The Mahalanobis distance (MD) is the distance to the center of the training data. The larger the MD, the less trustworthy the prediction.

Mahalanobis Distance p-value: The p-value gives the fraction of training data with an MD greater than or equal to the one for the given sample, assuming normally distributed data. The smaller the p-value, the less trustworthy the prediction. For highly non-normal X properties (e.g., fingerprints), the MD p-value is wildly inaccurate.

## Structural Similar Compounds

| Name               | Emetine                                                             | Carbenicillin                                                       | Moricizine                                                          |
|--------------------|---------------------------------------------------------------------|---------------------------------------------------------------------|---------------------------------------------------------------------|
| Structure          |                                                                     |                                                                     |                                                                     |
| Actual Endpoint    | Non-Carcinogen                                                      | Non-Carcinogen                                                      | Carcinogen                                                          |
| Predicted Endpoint | Non-Carcinogen                                                      | Non-Carcinogen                                                      | Carcinogen                                                          |
| Distance           | 0.694                                                               | 0.701                                                               | 0.708                                                               |
| Reference          | US FDA (Centre for Drug Eval.& Res./Off. Testing & Res.) Sept. 1997 | US FDA (Centre for Drug Eval.& Res./Off. Testing & Res.) Sept. 1997 | US FDA (Centre for Drug Eval.& Res./Off. Testing & Res.) Sept. 1997 |

## Model Applicability

Unknown features are fingerprint features in the query molecule, but not found or appearing too infrequently in the training set.

1. All properties and OPS components are within expected ranges.

## Feature Contribution

### Top features for positive contribution

| Fingerprint | Bit/Smiles | Feature Structure                         | Score | Carcinogen in training set |
|-------------|------------|-------------------------------------------|-------|----------------------------|
| SCFP_6      | 347048986  | <br>[*]C(=[*])N[c]1:[cH]:[cH]:[cH]:[cH]:1 | 0.615 | 5 out of 7                 |

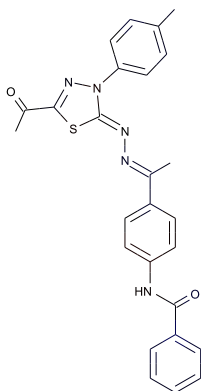

$C_{26}H_{23}N_5O_2S$

Molecular Weight: 469.55811

ALogP: 5.231

Rotatable Bonds: 6

Acceptors: 7

Donors: 1

## Model Prediction

Prediction: Non-Carcinogen

Probability: 0.334

Enrichment: 0.998

Bayesian Score: -0.816

Mahalanobis Distance: 16.4

Mahalanobis Distance p-value: 7.7e-010

Prediction: Positive if the Bayesian score is above the estimated best cutoff value from minimizing the false positive and false negative rate.

Probability: The estimated probability that the sample is in the positive category. This assumes that the Bayesian score follows a normal distribution and is different from the prediction using a cutoff.

Enrichment: An estimate of enrichment, that is, the increased likelihood (versus random) of this sample being in the category.

Bayesian Score: The standard Laplacian-modified Bayesian score.

Mahalanobis Distance: The Mahalanobis distance (MD) is the distance to the center of the training data. The larger the MD, the less trustworthy the prediction.

Mahalanobis Distance p-value: The p-value gives the fraction of training data with an MD greater than or equal to the one for the given sample, assuming normally distributed data. The smaller the p-value, the less trustworthy the prediction. For highly non-normal X properties (e.g., fingerprints), the MD p-value is wildly inaccurate.

## Structural Similar Compounds

| Name               | Moricizine                                                          | Carbenicillin                                                       | Emetine                                                             |
|--------------------|---------------------------------------------------------------------|---------------------------------------------------------------------|---------------------------------------------------------------------|
| Structure          |                                                                     |                                                                     |                                                                     |
| Actual Endpoint    | Carcinogen                                                          | Non-Carcinogen                                                      | Non-Carcinogen                                                      |
| Predicted Endpoint | Carcinogen                                                          | Non-Carcinogen                                                      | Non-Carcinogen                                                      |
| Distance           | 0.680                                                               | 0.685                                                               | 0.686                                                               |
| Reference          | US FDA (Centre for Drug Eval.& Res./Off. Testing & Res.) Sept. 1997 | US FDA (Centre for Drug Eval.& Res./Off. Testing & Res.) Sept. 1997 | US FDA (Centre for Drug Eval.& Res./Off. Testing & Res.) Sept. 1997 |

## Model Applicability

Unknown features are fingerprint features in the query molecule, but not found or appearing too infrequently in the training set.

- All properties and OPS components are within expected ranges.

## Feature Contribution

### Top features for positive contribution

| Fingerprint | Bit/Smiles | Feature Structure                                 | Score | Carcinogen in training set |
|-------------|------------|---------------------------------------------------|-------|----------------------------|
| SCFP_6      | 347048986  | <br>[*]C(=[*])N[c]1:[cH]:<br>[cH]:[*]:[cH]:[cH]:1 | 0.615 | 5 out of 7                 |

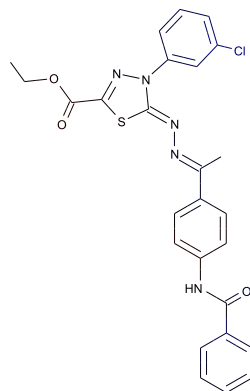

$C_{26}H_{22}ClN_5O_3S$

Molecular Weight: 520.00258

ALogP: 5.883

Rotatable Bonds: 8

Acceptors: 8

Donors: 1

## Model Prediction

Prediction: Non-Carcinogen

Probability: 0.29

Enrichment: 0.868

Bayesian Score: -2.53

Mahalanobis Distance: 16.9

Mahalanobis Distance p-value: 4.49e-011

Prediction: Positive if the Bayesian score is above the estimated best cutoff value from minimizing the false positive and false negative rate.

Probability: The estimated probability that the sample is in the positive category. This assumes that the Bayesian score follows a normal distribution and is different from the prediction using a cutoff.

Enrichment: An estimate of enrichment, that is, the increased likelihood (versus random) of this sample being in the category.

Bayesian Score: The standard Laplacian-modified Bayesian score.

Mahalanobis Distance: The Mahalanobis distance (MD) is the distance to the center of the training data. The larger the MD, the less trustworthy the prediction.

Mahalanobis Distance p-value: The p-value gives the fraction of training data with an MD greater than or equal to the one for the given sample, assuming normally distributed data. The smaller the p-value, the less trustworthy the prediction. For highly non-normal X properties (e.g., fingerprints), the MD p-value is wildly inaccurate.

## Structural Similar Compounds

| Name               | Deserpidine                                                         | Reserpine                                                           | Nicardipine                                                         |
|--------------------|---------------------------------------------------------------------|---------------------------------------------------------------------|---------------------------------------------------------------------|
| Structure          |                                                                     |                                                                     |                                                                     |
| Actual Endpoint    | Carcinogen                                                          | Carcinogen                                                          | Carcinogen                                                          |
| Predicted Endpoint | Carcinogen                                                          | Carcinogen                                                          | Carcinogen                                                          |
| Distance           | 0.610                                                               | 0.700                                                               | 0.733                                                               |
| Reference          | US FDA (Centre for Drug Eval.& Res./Off. Testing & Res.) Sept. 1997 | US FDA (Centre for Drug Eval.& Res./Off. Testing & Res.) Sept. 1997 | US FDA (Centre for Drug Eval.& Res./Off. Testing & Res.) Sept. 1997 |

## Model Applicability

Unknown features are fingerprint features in the query molecule, but not found or appearing too infrequently in the training set.

1. OPS PC3 out of range. Value: 8.3204. Training min, max, SD, explained variance: -5.918, 7.9008, 2.435, 0.0553.

## Feature Contribution

### Top features for positive contribution

| Fingerprint | Bit/Smiles | Feature Structure                                 | Score | Carcinogen in training set |
|-------------|------------|---------------------------------------------------|-------|----------------------------|
| SCFP_6      | -347048986 | <br>[*]C(=[*])N[c]1:[cH]:<br>[cH]:[*]:[cH]:[cH]:1 | 0.615 | 5 out of 7                 |

21b

TOPKAT\_Rat\_Male\_FDA\_None\_vs\_Carcinogen

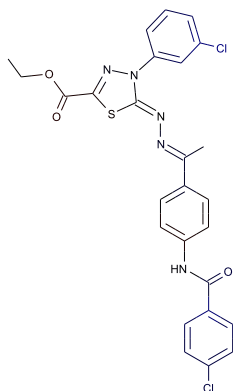C<sub>26</sub>H<sub>21</sub>Cl<sub>2</sub>N<sub>5</sub>O<sub>3</sub>S

Molecular Weight: 554.44763

ALogP: 6.547

Rotatable Bonds: 8

Acceptors: 8

Donors: 1

**Model Prediction**

Prediction: Non-Carcinogen

Probability: 0.275

Enrichment: 0.822

Bayesian Score: -3.21

Mahalanobis Distance: 17.2

Mahalanobis Distance p-value: 9.39e-012

Prediction: Positive if the Bayesian score is above the estimated best cutoff value from minimizing the false positive and false negative rate.

Probability: The estimated probability that the sample is in the positive category. This assumes that the Bayesian score follows a normal distribution and is different from the prediction using a cutoff.

Enrichment: An estimate of enrichment, that is, the increased likelihood (versus random) of this sample being in the category.

Bayesian Score: The standard Laplacian-modified Bayesian score.

Mahalanobis Distance: The Mahalanobis distance (MD) is the distance to the center of the training data. The larger the MD, the less trustworthy the prediction.

Mahalanobis Distance p-value: The p-value gives the fraction of training data with an MD greater than or equal to the one for the given sample, assuming normally distributed data. The smaller the p-value, the less trustworthy the prediction. For highly non-normal X properties (e.g., fingerprints), the MD p-value is wildly inaccurate.

**Structural Similar Compounds**

| Name               | Deserpidine                                                         | Reserpine                                                           | Bitolterol                                                          |
|--------------------|---------------------------------------------------------------------|---------------------------------------------------------------------|---------------------------------------------------------------------|
| Structure          |                                                                     |                                                                     |                                                                     |
| Actual Endpoint    | Carcinogen                                                          | Carcinogen                                                          | Non-Carcinogen                                                      |
| Predicted Endpoint | Carcinogen                                                          | Carcinogen                                                          | Non-Carcinogen                                                      |
| Distance           | 0.601                                                               | 0.680                                                               | 0.782                                                               |
| Reference          | US FDA (Centre for Drug Eval.& Res./Off. Testing & Res.) Sept. 1997 | US FDA (Centre for Drug Eval.& Res./Off. Testing & Res.) Sept. 1997 | US FDA (Centre for Drug Eval.& Res./Off. Testing & Res.) Sept. 1997 |

**Model Applicability**

Unknown features are fingerprint features in the query molecule, but not found or appearing too infrequently in the training set.

1. All properties and OPS components are within expected ranges.

**Feature Contribution****Top features for positive contribution**

| Fingerprint | Bit/Smiles | Feature Structure                                       | Score | Carcinogen in training set |
|-------------|------------|---------------------------------------------------------|-------|----------------------------|
| SCFP_6      | -347048986 | <br>[*]C(=[*])N[c]1:[cH]:[cH]:[cH]:[*]:[cH]:[cH]:[cH]:1 | 0.615 | 5 out of 7                 |

# Sorafenib

# TOPKAT\_Rat\_Male\_FDA\_None\_vs\_Carcinogen

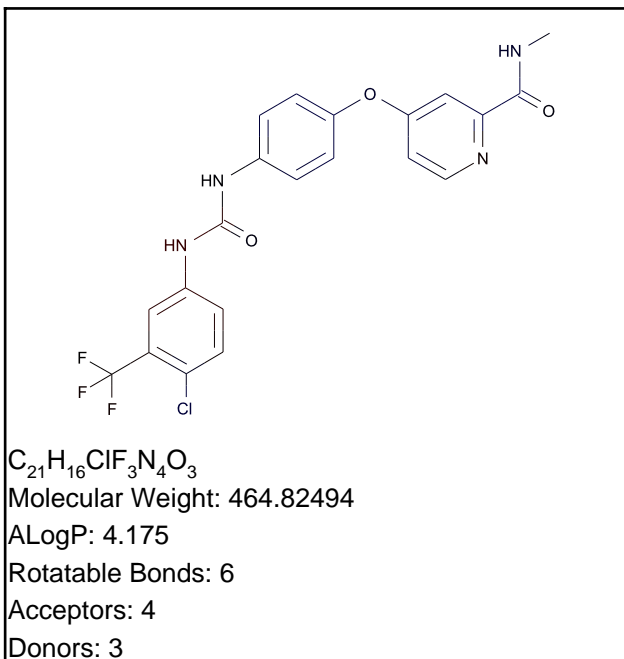

## Model Prediction

Prediction: Non-Carcinogen

Probability: 0.293

Enrichment: 0.878

Bayesian Score: -2.4

Mahalanobis Distance: 17.6

Mahalanobis Distance p-value: 1.1e-012

Prediction: Positive if the Bayesian score is above the estimated best cutoff value from minimizing the false positive and false negative rate.

Probability: The estimated probability that the sample is in the positive category. This assumes that the Bayesian score follows a normal distribution and is different from the prediction using a cutoff.

Enrichment: An estimate of enrichment, that is, the increased likelihood (versus random) of this sample being in the category.

Bayesian Score: The standard Laplacian-modified Bayesian score.

Mahalanobis Distance: The Mahalanobis distance (MD) is the distance to the center of the training data. The larger the MD, the less trustworthy the prediction.

Mahalanobis Distance p-value: The p-value gives the fraction of training data with an MD greater than or equal to the one for the given sample, assuming normally distributed data. The smaller the p-value, the less trustworthy the prediction. For highly non-normal X properties (e.g., fingerprints), the MD p-value is wildly inaccurate.

## Structural Similar Compounds

| Name               | Glyburide                                                                           | Glimepiride                                                                         | Fluvastatin                                                                         |
|--------------------|-------------------------------------------------------------------------------------|-------------------------------------------------------------------------------------|-------------------------------------------------------------------------------------|
| Structure          | 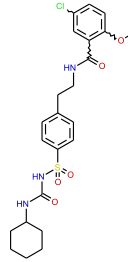 |  |  |
| Actual Endpoint    | Non-Carcinogen                                                                      | Non-Carcinogen                                                                      | Carcinogen                                                                          |
| Predicted Endpoint | Non-Carcinogen                                                                      | Non-Carcinogen                                                                      | Carcinogen                                                                          |
| Distance           | 0.593                                                                               | 0.600                                                                               | 0.615                                                                               |
| Reference          | US FDA (Centre for Drug Eval.& Res./Off. Testing & Res.) Sept. 1997                 | US FDA (Centre for Drug Eval.& Res./Off. Testing & Res.) Sept. 1997                 | US FDA (Centre for Drug Eval.& Res./Off. Testing & Res.) Sept. 1997                 |

## Model Applicability

Unknown features are fingerprint features in the query molecule, but not found or appearing too infrequently in the training set.

- All properties and OPS components are within expected ranges.

## Feature Contribution

### Top features for positive contribution

| Fingerprint | Bit/Smiles | Feature Structure                                                                                                                                    | Score | Carcinogen in training set |
|-------------|------------|------------------------------------------------------------------------------------------------------------------------------------------------------|-------|----------------------------|
| SCFP_6      | 347048986  | 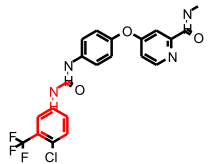<br><chem>[*]C(=[*])N[c]1:[cH]:[cH]:[*]:[cH]:[cH]:[cH]:1</chem> | 0.615 | 5 out of 7                 |



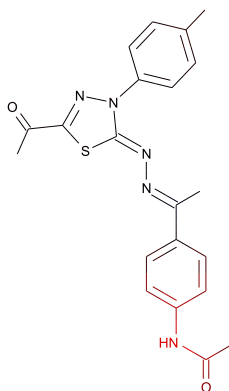

$C_{21}H_{21}N_5O_2S$

Molecular Weight: 407.48873

ALogP: 3.566

Rotatable Bonds: 5

Acceptors: 7

Donors: 1

## Model Prediction

**Prediction: Multiple-Carcinogen**

Probability: 0.562

Enrichment: 1.36

Bayesian Score: 4.21

Mahalanobis Distance: 16.7

Mahalanobis Distance p-value: 3.13e-007

Prediction: Positive if the Bayesian score is above the estimated best cutoff value from minimizing the false positive and false negative rate.

Probability: The estimated probability that the sample is in the positive category. This assumes that the Bayesian score follows a normal distribution and is different from the prediction using a cutoff.

Enrichment: An estimate of enrichment, that is, the increased likelihood (versus random) of this sample being in the category.

Bayesian Score: The standard Laplacian-modified Bayesian score.

Mahalanobis Distance: The Mahalanobis distance (MD) is the distance to the center of the training data. The larger the MD, the less trustworthy the prediction.

Mahalanobis Distance p-value: The p-value gives the fraction of training data with an MD greater than or equal to the one for the given sample, assuming normally distributed data. The smaller the p-value, the less trustworthy the prediction. For highly non-normal X properties (e.g., fingerprints), the MD p-value is wildly inaccurate.

## Structural Similar Compounds

| Name               | Moricizine                                                          | Isradipine                                                          | Omeprazole                                                          |
|--------------------|---------------------------------------------------------------------|---------------------------------------------------------------------|---------------------------------------------------------------------|
| Structure          |                                                                     |                                                                     |                                                                     |
| Actual Endpoint    | Single-Carcinogen                                                   | Single-Carcinogen                                                   | Single-Carcinogen                                                   |
| Predicted Endpoint | Single-Carcinogen                                                   | Single-Carcinogen                                                   | Single-Carcinogen                                                   |
| Distance           | 0.594                                                               | 0.636                                                               | 0.706                                                               |
| Reference          | US FDA (Centre for Drug Eval.& Res./Off. Testing & Res.) Sept. 1997 | US FDA (Centre for Drug Eval.& Res./Off. Testing & Res.) Sept. 1997 | US FDA (Centre for Drug Eval.& Res./Off. Testing & Res.) Sept. 1997 |

## Model Applicability

Unknown features are fingerprint features in the query molecule, but not found or appearing too infrequently in the training set.

1. All properties and OPS components are within expected ranges.

## Feature Contribution

### Top features for positive contribution

| Fingerprint | Bit/Smiles | Feature Structure                               | Score | Multiple-Carcinogen in training set |
|-------------|------------|-------------------------------------------------|-------|-------------------------------------|
| SCFP_8      | 2097618059 | <br><chem>[*]:[cH]:[c](NC(=O)C):[cH]:[*]</chem> | 0.681 | 6 out of 7                          |

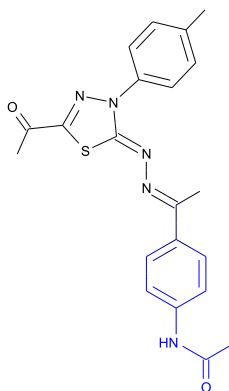

$C_{21}H_{21}N_5O_2S$

Molecular Weight: 407.48873

ALogP: 3.566

Rotatable Bonds: 5

Acceptors: 7

Donors: 1

## Model Prediction

Prediction: Non-Irritant

Probability: 8.91e-005

Enrichment: 9.67e-005

Bayesian Score: -9

Mahalanobis Distance: 9.99

Mahalanobis Distance p-value: 0.0644

Prediction: Positive if the Bayesian score is above the estimated best cutoff value from minimizing the false positive and false negative rate.

Probability: The estimated probability that the sample is in the positive category. This assumes that the Bayesian score follows a normal distribution and is different from the prediction using a cutoff.

Enrichment: An estimate of enrichment, that is, the increased likelihood (versus random) of this sample being in the category.

Bayesian Score: The standard Laplacian-modified Bayesian score.

Mahalanobis Distance: The Mahalanobis distance (MD) is the distance to the center of the training data. The larger the MD, the less trustworthy the prediction.

Mahalanobis Distance p-value: The p-value gives the fraction of training data with an MD greater than or equal to the one for the given sample, assuming normally distributed data. The smaller the p-value, the less trustworthy the prediction. For highly non-normal X properties (e.g., fingerprints), the MD p-value is wildly inaccurate.

## Structural Similar Compounds

| Name               | Pregna-1,4-diene-3,20-dione, 21-(acetyloxy)-11-hydroxy-6-methyl-17-(1-oxopropoxy)-, (6-alpha,11-beta)-                                                                          | 2-Anthracenesulfonic acid, 1-amino-9,10-dihydro-9,10-dioxo-4-(2,4,6-trimethylanilino)-, monosodium salt                                            | Benzenesulfonic acid, 5-(2H-naphtho(1,2-d)triazol-2-yl)-2-(2-phenyl ethenyl)-, sodium salt                |
|--------------------|---------------------------------------------------------------------------------------------------------------------------------------------------------------------------------|----------------------------------------------------------------------------------------------------------------------------------------------------|-----------------------------------------------------------------------------------------------------------|
| Structure          |                                                                                                                                                                                 |                                                                                                                                                    |                                                                                                           |
| Actual Endpoint    | Irritant                                                                                                                                                                        | Irritant                                                                                                                                           | Irritant                                                                                                  |
| Predicted Endpoint | Irritant                                                                                                                                                                        | Non-Irritant                                                                                                                                       | Irritant                                                                                                  |
| Distance           | 0.654                                                                                                                                                                           | 0.771                                                                                                                                              | 0.782                                                                                                     |
| Reference          | YACHDS Yakuri to Chiryō. Pharmacology and Therapeutics. (Raifu Saiensu Shup pan K.K., 2-5-13, Yaesu, Chuo-ku, Tokyo 104, Japan) V.1-1972- Volume(issue)/page/year: 19,3103,1991 | 85JCAE "Prehled Prumyslove Toxikologie; Organické Latky," Marhold, J., Prague, Czechoslovakia, Avicenum, 1986 Volume(issue)/page/year: -,1327,1986 | MVCRB3 MVC-Report. (Stockholm, Sweden) No.1-2, 1972-73. Discontinued. Volume(issue)/page/year: 2,193,1973 |

## Model Applicability

Unknown features are fingerprint features in the query molecule, but not found or appearing too infrequently in the training set.

- All properties and OPS components are within expected ranges.

## Feature Contribution

### Top features for positive contribution

| Fingerprint | Bit/Smiles | Feature Structure | Score | Irritant in training set |
|-------------|------------|-------------------|-------|--------------------------|
|             |            |                   |       |                          |

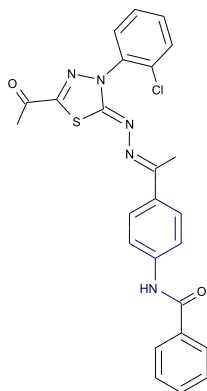

$C_{25}H_{20}ClN_5O_2S$

Molecular Weight: 489.97659

ALogP: 5.409

Rotatable Bonds: 6

Acceptors: 7

Donors: 1

## Model Prediction

Prediction: Non-Irritant

Probability: 0.876

Enrichment: 0.952

Bayesian Score: -2.99

Mahalanobis Distance: 10.7

Mahalanobis Distance p-value: 0.00706

Prediction: Positive if the Bayesian score is above the estimated best cutoff value from minimizing the false positive and false negative rate.

Probability: The estimated probability that the sample is in the positive category. This assumes that the Bayesian score follows a normal distribution and is different from the prediction using a cutoff.

Enrichment: An estimate of enrichment, that is, the increased likelihood (versus random) of this sample being in the category.

Bayesian Score: The standard Laplacian-modified Bayesian score.

Mahalanobis Distance: The Mahalanobis distance (MD) is the distance to the center of the training data. The larger the MD, the less trustworthy the prediction.

Mahalanobis Distance p-value: The p-value gives the fraction of training data with an MD greater than or equal to the one for the given sample, assuming normally distributed data. The smaller the p-value, the less trustworthy the prediction. For highly non-normal X properties (e.g., fingerprints), the MD p-value is wildly inaccurate.

## Structural Similar Compounds

| Name               | Benzenesulfonic acid, 2,2'-(4,4'-biphenylylene)divinylene) di-, disodium salt                             | Anthraquinone, 1,1'-iminodi-                                                                                                                      | Pregna-1,4-diene-3,20-dione, 21-(acetyloxy)-11-hydroxy-6-methyl-17-(1-oxopropoxy)-, (6- $\alpha$ ,11- $\beta$ )-                                                               |
|--------------------|-----------------------------------------------------------------------------------------------------------|---------------------------------------------------------------------------------------------------------------------------------------------------|--------------------------------------------------------------------------------------------------------------------------------------------------------------------------------|
| Structure          |                                                                                                           |                                                                                                                                                   |                                                                                                                                                                                |
| Actual Endpoint    | Irritant                                                                                                  | Irritant                                                                                                                                          | Irritant                                                                                                                                                                       |
| Predicted Endpoint | Non-Irritant                                                                                              | Non-Irritant                                                                                                                                      | Irritant                                                                                                                                                                       |
| Distance           | 0.721                                                                                                     | 0.795                                                                                                                                             | 0.817                                                                                                                                                                          |
| Reference          | MVCRB3 MVC-Report. (Stockholm, Sweden) No.1-2, 1972-73. Discontinued. Volume(issue)/page/year: 2,193,1973 | 85JCAE "Prehled Prumyslove Toxikologie; Organické Latky," Marhold, J., Prague, Czechoslovakia, Avicenum, 1986 Volume(issue)/page/year: -,735,1986 | YACHDS Yakuri to Chiryō. Pharmacology and Therapeutics. (Raifu Saiensu Shuppan K.K., 2-5-13, Yaesu, Chuo-ku, Tokyo 104, Japan) V.1-1972- Volume(issue)/page/year: 19,3103,1991 |

## Model Applicability

Unknown features are fingerprint features in the query molecule, but not found or appearing too infrequently in the training set.

- All properties and OPS components are within expected ranges.

## Feature Contribution

### Top features for positive contribution

| Fingerprint | Bit/Smiles | Feature Structure | Score | Irritant in training set |
|-------------|------------|-------------------|-------|--------------------------|
|             |            |                   |       |                          |

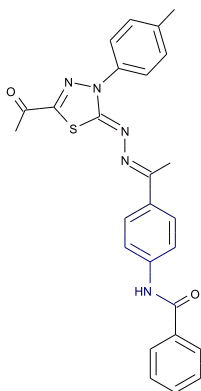

$C_{26}H_{23}N_5O_2S$

Molecular Weight: 469.55811

ALogP: 5.231

Rotatable Bonds: 6

Acceptors: 7

Donors: 1

## Model Prediction

Prediction: Non-Irritant

Probability: 0.912

Enrichment: 0.99

Bayesian Score: -2.61

Mahalanobis Distance: 10.3

Mahalanobis Distance p-value: 0.0276

Prediction: Positive if the Bayesian score is above the estimated best cutoff value from minimizing the false positive and false negative rate.

Probability: The estimated probability that the sample is in the positive category. This assumes that the Bayesian score follows a normal distribution and is different from the prediction using a cutoff.

Enrichment: An estimate of enrichment, that is, the increased likelihood (versus random) of this sample being in the category.

Bayesian Score: The standard Laplacian-modified Bayesian score.

Mahalanobis Distance: The Mahalanobis distance (MD) is the distance to the center of the training data. The larger the MD, the less trustworthy the prediction.

Mahalanobis Distance p-value: The p-value gives the fraction of training data with an MD greater than or equal to the one for the given sample, assuming normally distributed data. The smaller the p-value, the less trustworthy the prediction. For highly non-normal X properties (e.g., fingerprints), the MD p-value is wildly inaccurate.

## Structural Similar Compounds

| Name               | Benzenesulfonic acid, 2,2'-(4,4'-biphenylylene)divinyl-, disodium salt                                    | Anthraquinone, 1,1'-iminodi-                                                                                                                      | Pregna-1,4-diene-3,20-dione, 21-(acetyloxy)-11-hydroxy-6-methyl-17-(1-oxopropoxy)-, (6- $\alpha$ ,11- $\beta$ )-                                                               |
|--------------------|-----------------------------------------------------------------------------------------------------------|---------------------------------------------------------------------------------------------------------------------------------------------------|--------------------------------------------------------------------------------------------------------------------------------------------------------------------------------|
| Structure          |                                                                                                           |                                                                                                                                                   |                                                                                                                                                                                |
| Actual Endpoint    | Irritant                                                                                                  | Irritant                                                                                                                                          | Irritant                                                                                                                                                                       |
| Predicted Endpoint | Non-Irritant                                                                                              | Non-Irritant                                                                                                                                      | Irritant                                                                                                                                                                       |
| Distance           | 0.737                                                                                                     | 0.782                                                                                                                                             | 0.789                                                                                                                                                                          |
| Reference          | MVCRB3 MVC-Report. (Stockholm, Sweden) No.1-2, 1972-73. Discontinued. Volume(issue)/page/year: 2,193,1973 | 85JCAE "Prehled Prumyslove Toxikologie; Organické Latky," Marhold, J., Prague, Czechoslovakia, Avicenum, 1986 Volume(issue)/page/year: -,735,1986 | YACHDS Yakuri to Chiryō. Pharmacology and Therapeutics. (Raifu Saiensu Shuppan K.K., 2-5-13, Yaesu, Chuo-ku, Tokyo 104, Japan) V.1-1972- Volume(issue)/page/year: 19,3103,1991 |

## Model Applicability

Unknown features are fingerprint features in the query molecule, but not found or appearing too infrequently in the training set.

- All properties and OPS components are within expected ranges.

## Feature Contribution

### Top features for positive contribution

| Fingerprint | Bit/Smiles | Feature Structure | Score | Irritant in training set |
|-------------|------------|-------------------|-------|--------------------------|
|             |            |                   |       |                          |

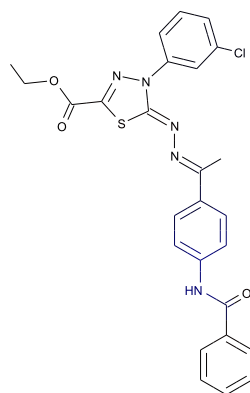

$C_{26}H_{22}ClN_5O_3S$

Molecular Weight: 520.00258

ALogP: 5.883

Rotatable Bonds: 8

Acceptors: 8

Donors: 1

## Model Prediction

Prediction: Non-Irritant

Probability: 0.879

Enrichment: 0.955

Bayesian Score: -2.97

Mahalanobis Distance: 9.79

Mahalanobis Distance p-value: 0.103

Prediction: Positive if the Bayesian score is above the estimated best cutoff value from minimizing the false positive and false negative rate.

Probability: The estimated probability that the sample is in the positive category. This assumes that the Bayesian score follows a normal distribution and is different from the prediction using a cutoff.

Enrichment: An estimate of enrichment, that is, the increased likelihood (versus random) of this sample being in the category.

Bayesian Score: The standard Laplacian-modified Bayesian score.

Mahalanobis Distance: The Mahalanobis distance (MD) is the distance to the center of the training data. The larger the MD, the less trustworthy the prediction.

Mahalanobis Distance p-value: The p-value gives the fraction of training data with an MD greater than or equal to the one for the given sample, assuming normally distributed data. The smaller the p-value, the less trustworthy the prediction. For highly non-normal X properties (e.g., fingerprints), the MD p-value is wildly inaccurate.

## Structural Similar Compounds

| Name               | Benzenesulfonic acid, 2,2'-(4,4'-biphenylylene)di-, disodium salt                                         | Pregna-1,4-diene-3,20-dione, 21-(acetyloxy)-11-hydroxy-6-methyl-17-(1-oxopropoxy)-, (6- $\alpha$ ,11- $\beta$ )-                                                                 | Anthraquinone, 1,1'-iminodi-                                                                                                                      |
|--------------------|-----------------------------------------------------------------------------------------------------------|----------------------------------------------------------------------------------------------------------------------------------------------------------------------------------|---------------------------------------------------------------------------------------------------------------------------------------------------|
| Structure          |                                                                                                           |                                                                                                                                                                                  |                                                                                                                                                   |
| Actual Endpoint    | Irritant                                                                                                  | Irritant                                                                                                                                                                         | Irritant                                                                                                                                          |
| Predicted Endpoint | Non-Irritant                                                                                              | Irritant                                                                                                                                                                         | Non-Irritant                                                                                                                                      |
| Distance           | 0.755                                                                                                     | 0.897                                                                                                                                                                            | 0.953                                                                                                                                             |
| Reference          | MVCRB3 MVC-Report. (Stockholm, Sweden) No.1-2, 1972-73. Discontinued. Volume(issue)/page/year: 2,193,1973 | YACHDS Yakuri to Chiryō. Pharmacology and Therapeutics. (Raifu Saiensu Shup pan K.K., 2-5-13, Yaesu, Chuo-ku, Tokyo 104, Japan) V.1-1972- Volume(issue) /page/year: 19,3103,1991 | 85JCAE "Prehled Prumyslove Toxikologie; Organické Latky," Marhold, J., Prague, Czechoslovakia, Avicenum, 1986 Volume(issue)/page/year: -,735,1986 |

## Model Applicability

Unknown features are fingerprint features in the query molecule, but not found or appearing too infrequently in the training set.

- All properties and OPS components are within expected ranges.

## Feature Contribution

### Top features for positive contribution

| Fingerprint | Bit/Smiles | Feature Structure | Score | Irritant in training set |
|-------------|------------|-------------------|-------|--------------------------|
|             |            |                   |       |                          |

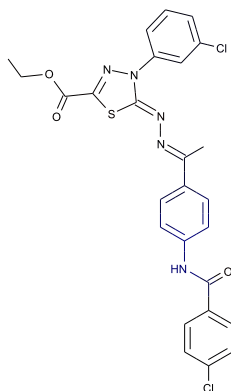

$C_{26}H_{21}Cl_2N_5O_3S$

Molecular Weight: 554.44763

ALogP: 6.547

Rotatable Bonds: 8

Acceptors: 8

Donors: 1

## Model Prediction

Prediction: Non-Irritant

Probability: 0.873

Enrichment: 0.948

Bayesian Score: -3.02

Mahalanobis Distance: 10

Mahalanobis Distance p-value: 0.0588

Prediction: Positive if the Bayesian score is above the estimated best cutoff value from minimizing the false positive and false negative rate.

Probability: The estimated probability that the sample is in the positive category. This assumes that the Bayesian score follows a normal distribution and is different from the prediction using a cutoff.

Enrichment: An estimate of enrichment, that is, the increased likelihood (versus random) of this sample being in the category.

Bayesian Score: The standard Laplacian-modified Bayesian score.

Mahalanobis Distance: The Mahalanobis distance (MD) is the distance to the center of the training data. The larger the MD, the less trustworthy the prediction.

Mahalanobis Distance p-value: The p-value gives the fraction of training data with an MD greater than or equal to the one for the given sample, assuming normally distributed data. The smaller the p-value, the less trustworthy the prediction. For highly non-normal X properties (e.g., fingerprints), the MD p-value is wildly inaccurate.

## Structural Similar Compounds

| Name               | Benzenesulfonic acid, 2,2'-(4,4'-biphenylenedivinylene)d i-, disodium salt                                | Butanamide, 2,2'-((3,3'-dichloro(1,1'-biphenyl)-4,4'-diyl)bis(azo)) bis(N-(2,4-dimethylphenyl)-3-oxo-                                                                          | Anthraquinone, 3-methoxy-5,4'-iminobis(1-benzamido-                                                                                                                                                            |
|--------------------|-----------------------------------------------------------------------------------------------------------|--------------------------------------------------------------------------------------------------------------------------------------------------------------------------------|----------------------------------------------------------------------------------------------------------------------------------------------------------------------------------------------------------------|
| Structure          |                                                                                                           |                                                                                                                                                                                |                                                                                                                                                                                                                |
| Actual Endpoint    | Irritant                                                                                                  | Irritant                                                                                                                                                                       | Irritant                                                                                                                                                                                                       |
| Predicted Endpoint | Non-Irritant                                                                                              | Non-Irritant                                                                                                                                                                   | Non-Irritant                                                                                                                                                                                                   |
| Distance           | 0.774                                                                                                     | 0.915                                                                                                                                                                          | 0.979                                                                                                                                                                                                          |
| Reference          | MVCRB3 MVC-Report. (Stockholm, Sweden) No.1-2, 1972-73. Discontinued. Volume(issue)/page/year: 2,193,1973 | NTIS** National Technical Information Service. (Springfield, VA 22161) Formerly U.S. Clearinghouse for Scientific & Technical Information. Volume(issue)/page/year: OTS0555058 | 28ZPAK "Sbornik Vysledku Toxologickeho Vysetreni Latek A Pripravku," Marhold, J.V., Institut Pro Vychovu Vedoucicn Pracovniku Chemickeho Prumyclu Praha, Czechoslovakia, 1972 Volume(issue)/page/year: -,114,1 |

## Model Applicability

Unknown features are fingerprint features in the query molecule, but not found or appearing too infrequently in the training set.

1. All properties and OPS components are within expected ranges.

## Feature Contribution

### Top features for positive contribution

| Fingerprint | Bit/Smiles | Feature Structure | Score | Irritant in training set |
|-------------|------------|-------------------|-------|--------------------------|
|             |            |                   |       |                          |

# Sorafenib

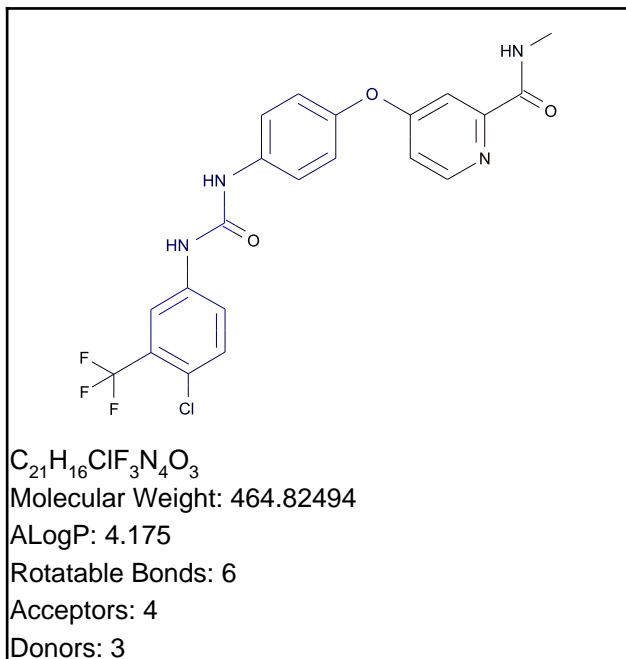

## Model Prediction

Prediction: Non-Irritant

Probability: 0.264

Enrichment: 0.287

Bayesian Score: -5.23

Mahalanobis Distance: 8.27

Mahalanobis Distance p-value: 0.791

Prediction: Positive if the Bayesian score is above the estimated best cutoff value from minimizing the false positive and false negative rate.

Probability: The estimated probability that the sample is in the positive category. This assumes that the Bayesian score follows a normal distribution and is different from the prediction using a cutoff.

Enrichment: An estimate of enrichment, that is, the increased likelihood (versus random) of this sample being in the category.

Bayesian Score: The standard Laplacian-modified Bayesian score.

Mahalanobis Distance: The Mahalanobis distance (MD) is the distance to the center of the training data. The larger the MD, the less trustworthy the prediction.

Mahalanobis Distance p-value: The p-value gives the fraction of training data with an MD greater than or equal to the one for the given sample, assuming normally distributed data. The smaller the p-value, the less trustworthy the prediction. For highly non-normal X properties (e.g., fingerprints), the MD p-value is wildly inaccurate.

# TOPKAT\_Skin\_Irritancy\_None\_vs\_Irritant

## Structural Similar Compounds

| Name               | 5-Norbornene-2,3-dicarboxylic acid, 1,4,5,6,7,7-hexachloro-                                                                                          | Benzenesulfonic acid, 2,2'-(4,4'-biphenylylene)di-, disodium salt                                         | Sulfide, bis(4-t-butyl-m-cresyl)-                                                                                                                                              |
|--------------------|------------------------------------------------------------------------------------------------------------------------------------------------------|-----------------------------------------------------------------------------------------------------------|--------------------------------------------------------------------------------------------------------------------------------------------------------------------------------|
| Structure          | 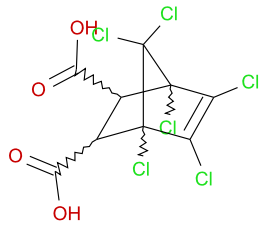                                                                  |                        |                                                                                             |
| Actual Endpoint    | Irritant                                                                                                                                             | Irritant                                                                                                  | Irritant                                                                                                                                                                       |
| Predicted Endpoint | Irritant                                                                                                                                             | Non-Irritant                                                                                              | Irritant                                                                                                                                                                       |
| Distance           | 0.844                                                                                                                                                | 0.871                                                                                                     | 0.884                                                                                                                                                                          |
| Reference          | 85JCAE "Prehled Prumyslove Toxikologie; Organické Latky," Marhold, J., Prague, Czechoslovakia, Avicenum, 1986<br>Volume(issue)/page/year: -,581,1986 | MVCRB3 MVC-Report. (Stockholm, Sweden) No.1-2, 1972-73. Discontinued. Volume(issue)/page/year: 2,193,1973 | AMIHBC AMA Archives of Industrial Hygiene and Occupational Medicine. (Chicago, IL) V.2-10, 1950-54. For publisher information, see AEHLAU. Volume(issue)/page/year: 5,311,1952 |

## Model Applicability

Unknown features are fingerprint features in the query molecule, but not found or appearing too infrequently in the training set.

1. All properties and OPS components are within expected ranges.

## Feature Contribution

### Top features for positive contribution

| Fingerprint | Bit/Smiles | Feature Structure | Score | Irritant in training set |
|-------------|------------|-------------------|-------|--------------------------|
|-------------|------------|-------------------|-------|--------------------------|



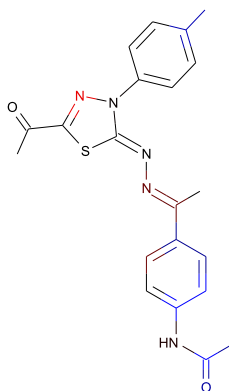

$C_{21}H_{21}N_5O_2S$

Molecular Weight: 407.48873

ALogP: 3.566

Rotatable Bonds: 5

Acceptors: 7

Donors: 1

### Model Prediction

Prediction: 24.9

Unit: mg/kg\_body\_weight/day

Mahalanobis Distance: 11.4

Mahalanobis Distance p-value: 0.000279

Mahalanobis Distance: The Mahalanobis distance (MD) is a generalization of the Euclidean distance that accounts for correlations among the X properties. It is calculated as the distance to the center of the training data. The larger the MD, the less trustworthy the prediction.

Mahalanobis Distance p-value: The p-value gives the fraction of training data with an MD greater than or equal to the one for the given sample, assuming normally distributed data. The smaller the p-value, the less trustworthy the prediction. For highly non-normal X properties (e.g., fingerprints), the MD p-value is wildly inaccurate.

### Structural Similar Compounds

| Name                        | 470     | C.I. pigment red 3 | [4-Chloro-6-(2,3-xylidino)-2-pyrimidinylthio]acetic acid s |
|-----------------------------|---------|--------------------|------------------------------------------------------------|
| Structure                   |         |                    |                                                            |
| Actual Endpoint (-log C)    | 4.62839 | 0.937339           | 4.47685                                                    |
| Predicted Endpoint (-log C) | 3.93264 | 3.17837            | 3.8529                                                     |
| Distance                    | 0.663   | 0.676              | 0.676                                                      |
| Reference                   | CPDB    | CPDB               | CPDB                                                       |

### Model Applicability

Unknown features are fingerprint features in the query molecule, but not found or appearing too infrequently in the training set.

1. All properties and OPS components are within expected ranges.
2. Unknown ECFP\_2 feature: 128986386: [\*]N=C(/C)[c](:[\*]):[\*]
3. Unknown ECFP\_2 feature: 562081661: [\*]C(=NN=[\*])[\*]
4. Unknown ECFP\_2 feature: -819426257: [\*]C(=NN=[\*])[\*]
5. Unknown ECFP\_2 feature: 189949281: [\*]N=C\1/S[\*]=[\*]N1[\*]
6. Unknown ECFP\_2 feature: -934225701: [\*]C(=[\*])C1=N[\*][\*]S1
7. Unknown ECFP\_2 feature: -1110911409: [\*]=C1[\*][\*]=NN1[c](:[\*]):[\*]

### Feature Contribution

#### Top features for positive contribution

| Fingerprint | Bit/Smiles | Feature Structure | Score |
|-------------|------------|-------------------|-------|
|             |            |                   |       |



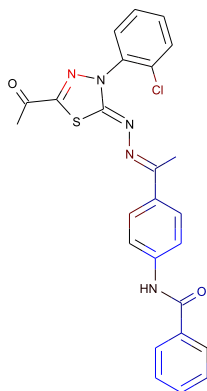

$C_{25}H_{20}ClN_5O_2S$

Molecular Weight: 489.97659

ALogP: 5.409

Rotatable Bonds: 6

Acceptors: 7

Donors: 1

### Model Prediction

Prediction: 8.42

Unit: mg/kg\_body\_weight/day

Mahalanobis Distance: 13.3

Mahalanobis Distance p-value: 1.87e-008

Mahalanobis Distance: The Mahalanobis distance (MD) is a generalization of the Euclidean distance that accounts for correlations among the X properties. It is calculated as the distance to the center of the training data. The larger the MD, the less trustworthy the prediction.

Mahalanobis Distance p-value: The p-value gives the fraction of training data with an MD greater than or equal to the one for the given sample, assuming normally distributed data. The smaller the p-value, the less trustworthy the prediction. For highly non-normal X properties (e.g., fingerprints), the MD p-value is wildly inaccurate.

### Structural Similar Compounds

| Name                        | 646      | Acifluorfen | Ochratoxin A |
|-----------------------------|----------|-------------|--------------|
| Structure                   |          |             |              |
| Actual Endpoint (-log C)    | 0.937339 | 3.40908     | 4.79932      |
| Predicted Endpoint (-log C) | 3.26294  | 3.10974     | 3.6353       |
| Distance                    | 0.788    | 0.822       | 0.825        |
| Reference                   | CPDB     | CPDB        | CPDB         |

### Model Applicability

Unknown features are fingerprint features in the query molecule, but not found or appearing too infrequently in the training set.

1. All properties and OPS components are within expected ranges.
2. Unknown ECFP\_2 feature: 128986386: [\*]N=C(/C)\[c](:[\*]):[\*]
3. Unknown ECFP\_2 feature: 562081661: [\*]C(=NN=[\*])[\*]
4. Unknown ECFP\_2 feature: -819426257: [\*]C(=NN=[\*])[\*]
5. Unknown ECFP\_2 feature: 189949281: [\*]N=C\1/S[\*]=[\*]N1[\*]
6. Unknown ECFP\_2 feature: -934225701: [\*]C(=[\*])C1=N[\*][\*]S1
7. Unknown ECFP\_2 feature: -1110911409: [\*]=C1[\*][\*]=NN1[c](:[\*]):[\*]
8. Unknown ECFP\_2 feature: -1236953626: [\*]N([\*])[c](:[cH]:[\*]):[c]([\*]):[\*]

### Feature Contribution

#### Top features for positive contribution

| Fingerprint | Bit/Smiles | Feature Structure | Score |
|-------------|------------|-------------------|-------|
|             |            |                   |       |

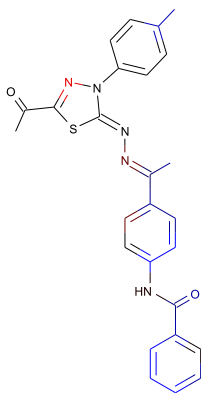

$C_{26}H_{23}N_5O_2S$

Molecular Weight: 469.55811

ALogP: 5.231

Rotatable Bonds: 6

Acceptors: 7

Donors: 1

### Model Prediction

Prediction: 18.9

Unit: mg/kg\_body\_weight/day

Mahalanobis Distance: 12.5

Mahalanobis Distance p-value: 1.8e-006

Mahalanobis Distance: The Mahalanobis distance (MD) is a generalization of the Euclidean distance that accounts for correlations among the X properties. It is calculated as the distance to the center of the training data. The larger the MD, the less trustworthy the prediction.

Mahalanobis Distance p-value: The p-value gives the fraction of training data with an MD greater than or equal to the one for the given sample, assuming normally distributed data. The smaller the p-value, the less trustworthy the prediction. For highly non-normal X properties (e.g., fingerprints), the MD p-value is wildly inaccurate.

### Structural Similar Compounds

| Name                        | 646      | C.I. pigment red 3 | [4-Chloro-6-(2,3-xylidino)-2-pyrimidinylthio]acetic acid s |
|-----------------------------|----------|--------------------|------------------------------------------------------------|
| Structure                   |          |                    |                                                            |
| Actual Endpoint (-log C)    | 0.937339 | 0.937339           | 4.47685                                                    |
| Predicted Endpoint (-log C) | 3.26294  | 3.17837            | 3.8529                                                     |
| Distance                    | 0.759    | 0.807              | 0.818                                                      |
| Reference                   | CPDB     | CPDB               | CPDB                                                       |

### Model Applicability

Unknown features are fingerprint features in the query molecule, but not found or appearing too infrequently in the training set.

1. All properties and OPS components are within expected ranges.
2. Unknown ECFP\_2 feature: 128986386: [\*]N=C(/C)[c](:[\*]):[\*]
3. Unknown ECFP\_2 feature: 562081661: [\*]C(=NN=[\*])[\*]
4. Unknown ECFP\_2 feature: -819426257: [\*]C(=NN=[\*])[\*]
5. Unknown ECFP\_2 feature: 189949281: [\*]N=C\1/S[\*]=[\*]N1[\*]
6. Unknown ECFP\_2 feature: -934225701: [\*]C(=[\*])C1=N[\*][\*]S1
7. Unknown ECFP\_2 feature: -1110911409: [\*]=C1[\*][\*]=NN1[c](:[\*]):[\*]

### Feature Contribution

#### Top features for positive contribution

| Fingerprint | Bit/Smiles | Feature Structure | Score |
|-------------|------------|-------------------|-------|
|             |            |                   |       |

21a

TOPKAT\_Carcinogenic\_Potency\_TD50\_Mouse

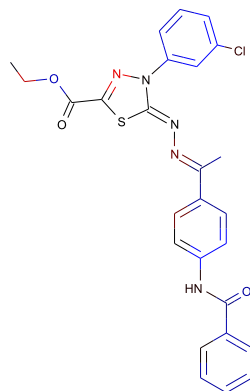C<sub>26</sub>H<sub>22</sub>ClN<sub>5</sub>O<sub>3</sub>S

Molecular Weight: 520.00258

ALogP: 5.883

Rotatable Bonds: 8

Acceptors: 8

Donors: 1

### Model Prediction

Prediction: 17.6

Unit: mg/kg\_body\_weight/day

Mahalanobis Distance: 14.6

Mahalanobis Distance p-value: 7.31e-012

Mahalanobis Distance: The Mahalanobis distance (MD) is a generalization of the Euclidean distance that accounts for correlations among the X properties. It is calculated as the distance to the center of the training data. The larger the MD, the less trustworthy the prediction.

Mahalanobis Distance p-value: The p-value gives the fraction of training data with an MD greater than or equal to the one for the given sample, assuming normally distributed data. The smaller the p-value, the less trustworthy the prediction. For highly non-normal X properties (e.g., fingerprints), the MD p-value is wildly inaccurate.

### Structural Similar Compounds

| Name                        | 223     | Tamoxifen citrate | 5,5'-(1,1'-Biphenyl)-2,5-dyl-bis(oxy)(2,2-dimethylpentanoic acid) |
|-----------------------------|---------|-------------------|-------------------------------------------------------------------|
| Structure                   |         |                   |                                                                   |
| Actual Endpoint (-log C)    | 5.08368 | 5.05965           | 3.90166                                                           |
| Predicted Endpoint (-log C) | 5.08273 | 4.24168           | 2.75893                                                           |
| Distance                    | 0.786   | 0.867             | 0.873                                                             |
| Reference                   | CPDB    | CPDB              | CPDB                                                              |

### Model Applicability

Unknown features are fingerprint features in the query molecule, but not found or appearing too infrequently in the training set.

1. All properties and OPS components are within expected ranges.
2. Unknown ECFP\_2 feature: 128986386: [\*]N=C(/C)[c](:[\*]):[\*]
3. Unknown ECFP\_2 feature: 562081661: [\*]C(=NN=[\*])[\*]
4. Unknown ECFP\_2 feature: -819426257: [\*]C(=NN=[\*])[\*]
5. Unknown ECFP\_2 feature: 189949281: [\*]N=C\1/S[\*]=[\*]N1[\*]
6. Unknown ECFP\_2 feature: -934225701: [\*]C(=[\*])C1=N[\*][\*]S1
7. Unknown ECFP\_2 feature: -1110911409: [\*]=C1[\*][\*]=NN1[c](:[\*]):[\*]

### Feature Contribution

#### Top features for positive contribution

| Fingerprint | Bit/Smiles | Feature Structure | Score |
|-------------|------------|-------------------|-------|
|             |            |                   |       |

21b

TOPKAT\_Carcinogenic\_Potency\_TD50\_Mouse

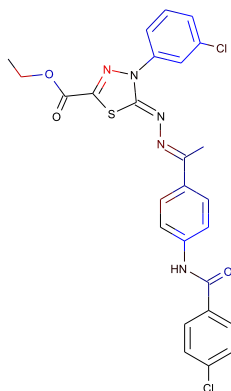
 $C_{26}H_{21}Cl_2N_5O_3S$ 

Molecular Weight: 554.44763

ALogP: 6.547

Rotatable Bonds: 8

Acceptors: 8

Donors: 1

### Model Prediction

Prediction: 9.61

Unit: mg/kg\_body\_weight/day

Mahalanobis Distance: 15.6

Mahalanobis Distance p-value: 7.55e-015

Mahalanobis Distance: The Mahalanobis distance (MD) is a generalization of the Euclidean distance that accounts for correlations among the X properties. It is calculated as the distance to the center of the training data. The larger the MD, the less trustworthy the prediction.

Mahalanobis Distance p-value: The p-value gives the fraction of training data with an MD greater than or equal to the one for the given sample, assuming normally distributed data. The smaller the p-value, the less trustworthy the prediction. For highly non-normal X properties (e.g., fingerprints), the MD p-value is wildly inaccurate.

### Structural Similar Compounds

| Name                        | 223     | Estradiol mustard | 5,5'-(1,1'-Biphenyl)-2,5-dyl-bis (oxy)(2,2-dimethylpentanoic acid) |
|-----------------------------|---------|-------------------|--------------------------------------------------------------------|
| Structure                   |         |                   |                                                                    |
| Actual Endpoint (-log C)    | 5.08368 | 5.58568           | 3.90166                                                            |
| Predicted Endpoint (-log C) | 5.08273 | 5.97715           | 2.75893                                                            |
| Distance                    | 0.795   | 0.890             | 0.897                                                              |
| Reference                   | CPDB    | CPDB              | CPDB                                                               |

### Model Applicability

Unknown features are fingerprint features in the query molecule, but not found or appearing too infrequently in the training set.

1. OPS PC20 out of range. Value: 3.8772. Training min, max, SD, explained variance: -4.3384, 3.4394, 1.14, 0.0162.
2. OPS PC24 out of range. Value: -4.6329. Training min, max, SD, explained variance: -4.4826, 3.8729, 1.034, 0.0133.
3. Unknown ECFP\_2 feature: 128986386: [\*]N=C(/C)\[c](:[\*]):[\*]
4. Unknown ECFP\_2 feature: 562081661: [\*]C(=NN=[\*])[\*]
5. Unknown ECFP\_2 feature: -819426257: [\*]C(=NN=[\*])[\*]
6. Unknown ECFP\_2 feature: 189949281: [\*]N=C\1/S[\*]=[\*]N1[\*]
7. Unknown ECFP\_2 feature: -934225701: [\*]C(=[\*])C1=N[\*][\*]S1
8. Unknown ECFP\_2 feature: -1110911409: [\*]=C1[\*][\*]=NN1[c](:[\*]):[\*]

### Feature Contribution

#### Top features for positive contribution

| Fingerprint | Bit/Smiles | Feature Structure | Score |
|-------------|------------|-------------------|-------|
|             |            |                   |       |

# Sorafenib

# TOPKAT\_Carcinogenic\_Potency\_TD50\_Mouse

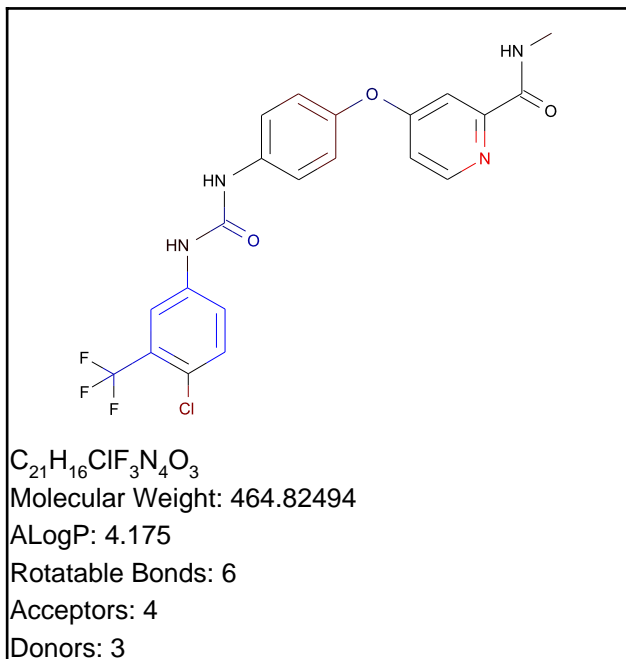

## Model Prediction

Prediction: 19.2

Unit: mg/kg\_body\_weight/day

Mahalanobis Distance: 12.4

Mahalanobis Distance p-value: 2.94e-006

Mahalanobis Distance: The Mahalanobis distance (MD) is a generalization of the Euclidean distance that accounts for correlations among the X properties. It is calculated as the distance to the center of the training data. The larger the MD, the less trustworthy the prediction.

Mahalanobis Distance p-value: The p-value gives the fraction of training data with an MD greater than or equal to the one for the given sample, assuming normally distributed data. The smaller the p-value, the less trustworthy the prediction. For highly non-normal X properties (e.g., fingerprints), the MD p-value is wildly inaccurate.

## Structural Similar Compounds

| Name                        | Ochratoxin A                                                                        | 542                                                                                 | 4-Chloro-6-(2,3-xylylidino)-2-pyridinylthio(N-b-hydroxy-ethyl) acetamide            |
|-----------------------------|-------------------------------------------------------------------------------------|-------------------------------------------------------------------------------------|-------------------------------------------------------------------------------------|
| Structure                   | 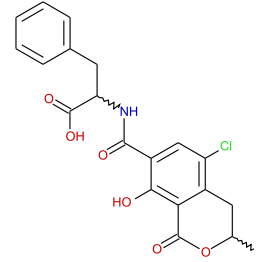 |  |  |
| Actual Endpoint (-log C)    | 4.79932                                                                             | 4.79932                                                                             | 3.91517                                                                             |
| Predicted Endpoint (-log C) | 3.6353                                                                              | 3.6353                                                                              | 3.92186                                                                             |
| Distance                    | 0.718                                                                               | 0.718                                                                               | 0.738                                                                               |
| Reference                   | CPDB                                                                                | CPDB                                                                                | CPDB                                                                                |

## Model Applicability

Unknown features are fingerprint features in the query molecule, but not found or appearing too infrequently in the training set.

- All properties and OPS components are within expected ranges.
- Unknown ECFP\_2 feature: 1338334141: [\*]C(=[\*])NC
- Unknown ECFP\_2 feature: 1413420509: [\*]C(=[\*])[c](:n:[\*]):c:[\*]

## Feature Contribution

### Top features for positive contribution

| Fingerprint | Bit/Smiles | Feature Structure                                                                                 | Score |
|-------------|------------|---------------------------------------------------------------------------------------------------|-------|
| ECFP_6      | 655739385  | 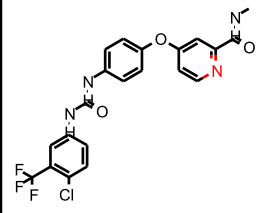<br>[*]N=[*] | 0.229 |

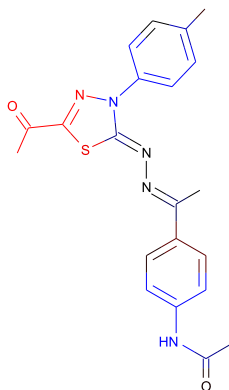

$C_{21}H_{21}N_5O_2S$

Molecular Weight: 407.48873

ALogP: 3.566

Rotatable Bonds: 5

Acceptors: 7

Donors: 1

### Model Prediction

Prediction: 10.5

Unit: mg/kg\_body\_weight/day

Mahalanobis Distance: 13.2

Mahalanobis Distance p-value: 1.49e-006

Mahalanobis Distance: The Mahalanobis distance (MD) is a generalization of the Euclidean distance that accounts for correlations among the X properties. It is calculated as the distance to the center of the training data. The larger the MD, the less trustworthy the prediction.

Mahalanobis Distance p-value: The p-value gives the fraction of training data with an MD greater than or equal to the one for the given sample, assuming normally distributed data. The smaller the p-value, the less trustworthy the prediction. For highly non-normal X properties (e.g., fingerprints), the MD p-value is wildly inaccurate.

### Structural Similar Compounds

| Name                        | C.I. pigment red 3 | 4,4'-Sulfonylbisacetanilide | Omeprazole |
|-----------------------------|--------------------|-----------------------------|------------|
| Structure                   |                    |                             |            |
| Actual Endpoint (-log C)    | 2.41938            | 3.77655                     | 3.4628     |
| Predicted Endpoint (-log C) | 4.26375            | 3.55337                     | 4.7324     |
| Distance                    | 0.634              | 0.650                       | 0.656      |
| Reference                   | CPDB               | CPDB                        | CPDB       |

### Model Applicability

Unknown features are fingerprint features in the query molecule, but not found or appearing too infrequently in the training set.

1. All properties and OPS components are within expected ranges.

### Feature Contribution

#### Top features for positive contribution

| Fingerprint | Bit/Smiles | Feature Structure                  | Score |
|-------------|------------|------------------------------------|-------|
| FCFP_6      | 565998553  | <br><chem>[*]C(=O)C1=N[*]S1</chem> | 0.357 |

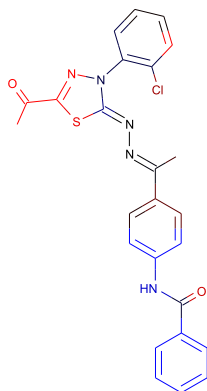

$C_{25}H_{20}ClN_5O_2S$

Molecular Weight: 489.97659

ALogP: 5.409

Rotatable Bonds: 6

Acceptors: 7

Donors: 1

### Model Prediction

Prediction: 6.85

Unit: mg/kg\_body\_weight/day

Mahalanobis Distance: 14.7

Mahalanobis Distance p-value: 3.34e-010

Mahalanobis Distance: The Mahalanobis distance (MD) is a generalization of the Euclidean distance that accounts for correlations among the X properties. It is calculated as the distance to the center of the training data. The larger the MD, the less trustworthy the prediction.

Mahalanobis Distance p-value: The p-value gives the fraction of training data with an MD greater than or equal to the one for the given sample, assuming normally distributed data. The smaller the p-value, the less trustworthy the prediction. For highly non-normal X properties (e.g., fingerprints), the MD p-value is wildly inaccurate.

### Structural Similar Compounds

| Name                        | C.I. direct brown 95 | FD & C violet no. 1 | 3-(Cyclopentyloxy)-N-(3,5-dichloro-4-pyridyl)-4-methoxybenzamide |
|-----------------------------|----------------------|---------------------|------------------------------------------------------------------|
| Structure                   |                      |                     |                                                                  |
| Actual Endpoint (-log C)    | 5.31387              | 2.8543              | 5.39369                                                          |
| Predicted Endpoint (-log C) | 4.30266              | 3.40838             | 4.27874                                                          |
| Distance                    | 0.659                | 0.719               | 0.749                                                            |
| Reference                   | CPDB                 | CPDB                | CPDB                                                             |

### Model Applicability

Unknown features are fingerprint features in the query molecule, but not found or appearing too infrequently in the training set.

- All properties and OPS components are within expected ranges.

### Feature Contribution

#### Top features for positive contribution

| Fingerprint | Bit/Smiles | Feature Structure                  | Score |
|-------------|------------|------------------------------------|-------|
| FCFP_6      | 565998553  | <br><chem>[*]C(=*)C1=N[*]S1</chem> | 0.357 |

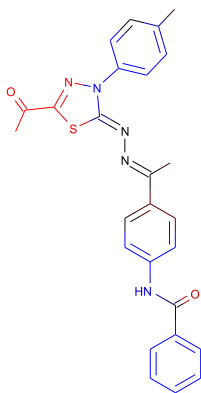

$C_{26}H_{23}N_5O_2S$

Molecular Weight: 469.55811

ALogP: 5.231

Rotatable Bonds: 6

Acceptors: 7

Donors: 1

### Model Prediction

Prediction: 15.5

Unit: mg/kg\_body\_weight/day

Mahalanobis Distance: 14.3

Mahalanobis Distance p-value: 2.75e-009

Mahalanobis Distance: The Mahalanobis distance (MD) is a generalization of the Euclidean distance that accounts for correlations among the X properties. It is calculated as the distance to the center of the training data. The larger the MD, the less trustworthy the prediction.

Mahalanobis Distance p-value: The p-value gives the fraction of training data with an MD greater than or equal to the one for the given sample, assuming normally distributed data. The smaller the p-value, the less trustworthy the prediction. For highly non-normal X properties (e.g., fingerprints), the MD p-value is wildly inaccurate.

### Structural Similar Compounds

| Name                        | C.I. direct brown 95 | FD & C violet no. 1 | Omeprazole |
|-----------------------------|----------------------|---------------------|------------|
| Structure                   |                      |                     |            |
| Actual Endpoint (-log C)    | 5.31387              | 2.8543              | 3.4628     |
| Predicted Endpoint (-log C) | 4.30266              | 3.40838             | 4.7324     |
| Distance                    | 0.646                | 0.713               | 0.751      |
| Reference                   | CPDB                 | CPDB                | CPDB       |

### Model Applicability

Unknown features are fingerprint features in the query molecule, but not found or appearing too infrequently in the training set.

1. All properties and OPS components are within expected ranges.

### Feature Contribution

#### Top features for positive contribution

| Fingerprint | Bit/Smiles | Feature Structure                  | Score |
|-------------|------------|------------------------------------|-------|
| FCFP_6      | 565998553  | <br><chem>[*]C(=O)C1=N[*]S1</chem> | 0.357 |



21a

TOPKAT\_Carcinogenic\_Potency\_TD50\_Rat

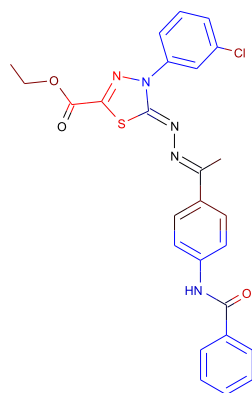C<sub>26</sub>H<sub>22</sub>ClN<sub>5</sub>O<sub>3</sub>S

Molecular Weight: 520.00258

ALogP: 5.883

Rotatable Bonds: 8

Acceptors: 8

Donors: 1

### Model Prediction

Prediction: 15.6

Unit: mg/kg\_body\_weight/day

Mahalanobis Distance: 13.6

Mahalanobis Distance p-value: 2.14e-007

Mahalanobis Distance: The Mahalanobis distance (MD) is a generalization of the Euclidean distance that accounts for correlations among the X properties. It is calculated as the distance to the center of the training data. The larger the MD, the less trustworthy the prediction.

Mahalanobis Distance p-value: The p-value gives the fraction of training data with an MD greater than or equal to the one for the given sample, assuming normally distributed data. The smaller the p-value, the less trustworthy the prediction. For highly non-normal X properties (e.g., fingerprints), the MD p-value is wildly inaccurate.

### Structural Similar Compounds

| Name                        | C.I. direct brown 95 | 223     | FD & C violet no. 1 |
|-----------------------------|----------------------|---------|---------------------|
| Structure                   |                      |         |                     |
| Actual Endpoint (-log C)    | 5.31387              | 6.29867 | 2.8543              |
| Predicted Endpoint (-log C) | 4.30266              | 7.5657  | 3.40838             |
| Distance                    | 0.668                | 0.799   | 0.799               |
| Reference                   | CPDB                 | CPDB    | CPDB                |

### Model Applicability

Unknown features are fingerprint features in the query molecule, but not found or appearing too infrequently in the training set.

1. All properties and OPS components are within expected ranges.

### Feature Contribution

#### Top features for positive contribution

| Fingerprint | Bit/Smiles | Feature Structure                  | Score |
|-------------|------------|------------------------------------|-------|
| FCFP_6      | 565998553  | <br><chem>[*]C(=*)C1=N[*]S1</chem> | 0.357 |

21b

TOPKAT\_Carcinogenic\_Potency\_TD50\_Rat

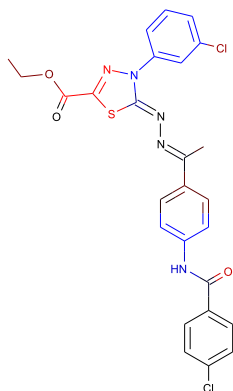C<sub>26</sub>H<sub>21</sub>Cl<sub>2</sub>N<sub>5</sub>O<sub>3</sub>S

Molecular Weight: 554.44763

ALogP: 6.547

Rotatable Bonds: 8

Acceptors: 8

Donors: 1

### Model Prediction

Prediction: 5.66

Unit: mg/kg\_body\_weight/day

Mahalanobis Distance: 13.6

Mahalanobis Distance p-value: 2.54e-007

Mahalanobis Distance: The Mahalanobis distance (MD) is a generalization of the Euclidean distance that accounts for correlations among the X properties. It is calculated as the distance to the center of the training data. The larger the MD, the less trustworthy the prediction.

Mahalanobis Distance p-value: The p-value gives the fraction of training data with an MD greater than or equal to the one for the given sample, assuming normally distributed data. The smaller the p-value, the less trustworthy the prediction. For highly non-normal X properties (e.g., fingerprints), the MD p-value is wildly inaccurate.

### Structural Similar Compounds

| Name                        | C.I. direct brown 95 | 223     | FD & C violet no. 1 |
|-----------------------------|----------------------|---------|---------------------|
| Structure                   |                      |         |                     |
| Actual Endpoint (-log C)    | 5.31387              | 6.29867 | 2.8543              |
| Predicted Endpoint (-log C) | 4.30266              | 7.5657  | 3.40838             |
| Distance                    | 0.717                | 0.803   | 0.822               |
| Reference                   | CPDB                 | CPDB    | CPDB                |

### Model Applicability

Unknown features are fingerprint features in the query molecule, but not found or appearing too infrequently in the training set.

1. All properties and OPS components are within expected ranges.

### Feature Contribution

#### Top features for positive contribution

| Fingerprint | Bit/Smiles | Feature Structure                  | Score |
|-------------|------------|------------------------------------|-------|
| FCFP_6      | 565998553  | <br><chem>[*]C(=*)C1=N[*]S1</chem> | 0.357 |

# Sorafenib

# TOPKAT\_Carcinogenic\_Potency\_TD50\_Rat

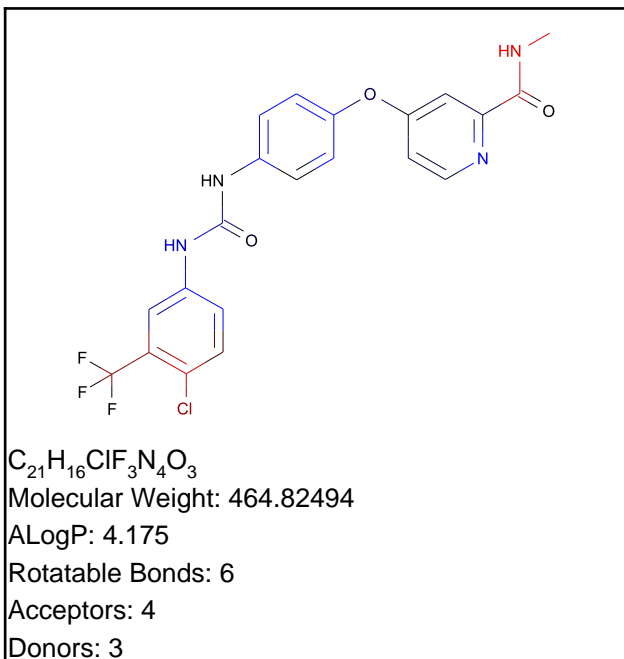

## Model Prediction

Prediction: 14.2

Unit: mg/kg\_body\_weight/day

Mahalanobis Distance: 20.4

Mahalanobis Distance p-value: 9.56e-031

Mahalanobis Distance: The Mahalanobis distance (MD) is a generalization of the Euclidean distance that accounts for correlations among the X properties. It is calculated as the distance to the center of the training data. The larger the MD, the less trustworthy the prediction.

Mahalanobis Distance p-value: The p-value gives the fraction of training data with an MD greater than or equal to the one for the given sample, assuming normally distributed data. The smaller the p-value, the less trustworthy the prediction. For highly non-normal X properties (e.g., fingerprints), the MD p-value is wildly inaccurate.

## Structural Similar Compounds

| Name                        | Fluvastatin                                                                         | 913                                                                                 | Ochratoxin A                                                                        |
|-----------------------------|-------------------------------------------------------------------------------------|-------------------------------------------------------------------------------------|-------------------------------------------------------------------------------------|
| Structure                   | 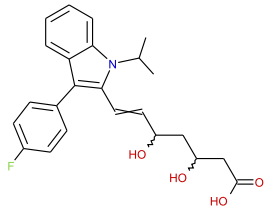 |  |  |
| Actual Endpoint (-log C)    | 3.51742                                                                             | 3.51742                                                                             | 6.47264                                                                             |
| Predicted Endpoint (-log C) | 5.41573                                                                             | 5.41573                                                                             | 5.06501                                                                             |
| Distance                    | 0.597                                                                               | 0.597                                                                               | 0.666                                                                               |
| Reference                   | CPDB                                                                                | CPDB                                                                                | CPDB                                                                                |

## Model Applicability

Unknown features are fingerprint features in the query molecule, but not found or appearing too infrequently in the training set.

- All properties and OPS components are within expected ranges.
- Unknown FCFP\_2 feature: -1029533685: [\*]:[c](:[\*])C(F)(F)F

## Feature Contribution

### Top features for positive contribution

| Fingerprint | Bit/Smiles | Feature Structure                                                                              | Score |
|-------------|------------|------------------------------------------------------------------------------------------------|-------|
| FCFP_6      | 1          | 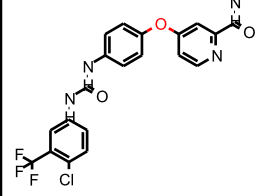<br>[*]=O | 0.234 |

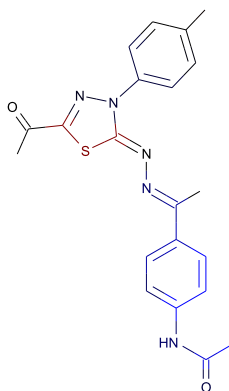

$C_{21}H_{21}N_5O_2S$

Molecular Weight: 407.48873

ALogP: 3.566

Rotatable Bonds: 5

Acceptors: 7

Donors: 1

### Model Prediction

Prediction: 0.0755

Unit: g/kg\_body\_weight

Mahalanobis Distance: 30.7

Mahalanobis Distance p-value: 7.29e-026

Mahalanobis Distance: The Mahalanobis distance (MD) is a generalization of the Euclidean distance that accounts for correlations among the X properties. It is calculated as the distance to the center of the training data. The larger the MD, the less trustworthy the prediction.

Mahalanobis Distance p-value: The p-value gives the fraction of training data with an MD greater than or equal to the one for the given sample, assuming normally distributed data. The smaller the p-value, the less trustworthy the prediction. For highly non-normal X properties (e.g., fingerprints), the MD p-value is wildly inaccurate.

### Structural Similar Compounds

| Name                        | DILTIAZEM | SODIUM ACIFLUORFEN              | DANTROLENE.NA |
|-----------------------------|-----------|---------------------------------|---------------|
| Structure                   |           |                                 |               |
| Actual Endpoint (-log C)    | 4.21961   | 4.16036                         | 4.19625       |
| Predicted Endpoint (-log C) | 4.005     | 4.65915                         | 4.62637       |
| Distance                    | 0.600     | 0.624                           | 0.651         |
| Reference                   | NDA-18602 | EPA COVER SHEET 0192;891101;(1) | NDA-17443     |

### Model Applicability

Unknown features are fingerprint features in the query molecule, but not found or appearing too infrequently in the training set.

1. All properties and OPS components are within expected ranges.
2. Unknown ECFP\_6 feature: 912478223: [\*]S[\*]
3. Unknown ECFP\_6 feature: -175146122: [\*]C(=[\*])[c](:[cH]:[\*]):[cH]:[\*]
4. Unknown ECFP\_6 feature: -177077903: [\*]N[c](:[cH]:[\*]):[cH]:[\*]
5. Unknown ECFP\_6 feature: 128986386: [\*]N=C(/C)\[c](:[\*]):[\*]
6. Unknown ECFP\_6 feature: -474544785: [\*]NC(=O)C
7. Unknown ECFP\_6 feature: 562081661: [\*]C(=NN=[\*])[\*]
8. Unknown ECFP\_6 feature: -819426257: [\*]C(=NN=[\*])[\*]
9. Unknown ECFP\_6 feature: 189949281: [\*]N=C\1/S[\*]=[\*]N1[\*]
10. Unknown ECFP\_6 feature: 2122741631: [\*]C1=[\*][\*]C(=[\*])S1
11. Unknown ECFP\_6 feature: -934225701: [\*]C(=[\*])C1=N[\*][\*]S1
12. Unknown ECFP\_6 feature: 2092245922: [\*]N1[\*][\*]C(=N1)[\*]
13. Unknown ECFP\_6 feature: -1110911409: [\*]=C1[\*][\*]=NN1[c](:[\*]):[\*]
14. Unknown ECFP\_6 feature: -175021654: [\*]N([\*])[c](:[cH]:[\*]):[cH]:[\*]
15. Unknown ECFP\_6 feature: 129482634: [\*]C(=[\*])C(=O)C
16. Unknown ECFP\_6 feature: -179515162: [\*]:[cH]:[c](C):[cH]:[\*]

### Feature Contribution

Top features for positive contribution

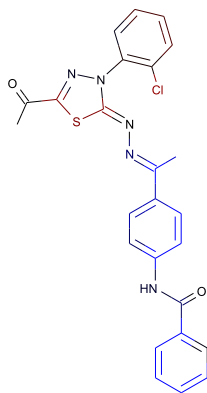

$C_{25}H_{20}ClN_5O_2S$

Molecular Weight: 489.97659

ALogP: 5.409

Rotatable Bonds: 6

Acceptors: 7

Donors: 1

### Model Prediction

Prediction: 0.0791

Unit: g/kg\_body\_weight

Mahalanobis Distance: 32.1

Mahalanobis Distance p-value: 1.54e-028

Mahalanobis Distance: The Mahalanobis distance (MD) is a generalization of the Euclidean distance that accounts for correlations among the X properties. It is calculated as the distance to the center of the training data. The larger the MD, the less trustworthy the prediction.

Mahalanobis Distance p-value: The p-value gives the fraction of training data with an MD greater than or equal to the one for the given sample, assuming normally distributed data. The smaller the p-value, the less trustworthy the prediction. For highly non-normal X properties (e.g., fingerprints), the MD p-value is wildly inaccurate.

### Structural Similar Compounds

| Name                        | FLUVALINATE                     | D & C RED 9      | RHODAMINE 6G |
|-----------------------------|---------------------------------|------------------|--------------|
| Structure                   |                                 |                  |              |
| Actual Endpoint (-log C)    | 5.30356                         | 3.87715          | 4.54906      |
| Predicted Endpoint (-log C) | 4.89944                         | 3.6546           | 4.6787       |
| Distance                    | 0.702                           | 0.717            | 0.724        |
| Reference                   | EPA COVER SHEET 0281;880630;(1) | NTP REPORT # 225 | NTP 364 39   |

### Model Applicability

Unknown features are fingerprint features in the query molecule, but not found or appearing too infrequently in the training set.

1. OPS PC32 out of range. Value: 4.6507. Training min, max, SD, explained variance: -4.2021, 4.2975, 1.228, 0.0066.
2. Unknown ECFP\_6 feature: 912478223: [\*]S[\*]
3. Unknown ECFP\_6 feature: -175146122: [\*]C(=[\*])[c](:[cH]:[\*]):[cH]:[\*]
4. Unknown ECFP\_6 feature: -177077903: [\*]N[c](:[cH]:[\*]):[cH]:[\*]
5. Unknown ECFP\_6 feature: 128986386: [\*]N=C(/C)\[c](:[\*]):[\*]
6. Unknown ECFP\_6 feature: 1997021792: [\*]:[cH]:[cH]:[cH]:[\*]
7. Unknown ECFP\_6 feature: 1430169877: [\*]NC(=O)[c](:[\*]):[\*]
8. Unknown ECFP\_6 feature: 562081661: [\*]C(=NN=[\*])[\*]
9. Unknown ECFP\_6 feature: -819426257: [\*]C(=NN=[\*])[\*]
10. Unknown ECFP\_6 feature: 189949281: [\*]N=C\1/S[\*]=[\*]N1[\*]
11. Unknown ECFP\_6 feature: 2122741631: [\*]C1=[\*][\*]C(=[\*])S1
12. Unknown ECFP\_6 feature: -934225701: [\*]C(=[\*])C1=N[\*][\*]S1
13. Unknown ECFP\_6 feature: 2092245922: [\*]N1[\*][\*]C(=N1)[\*]
14. Unknown ECFP\_6 feature: -1110911409: [\*]=C1[\*][\*]=NN1[c](:[\*]):[\*]
15. Unknown ECFP\_6 feature: -1236953626: [\*]N([\*])[c](:[cH]:[\*]):[c]([\*]):[\*]
16. Unknown ECFP\_6 feature: 129482634: [\*]C(=[\*])C(=O)C
17. Unknown ECFP\_6 feature: 99947387: [\*]:[c](:[\*])Cl

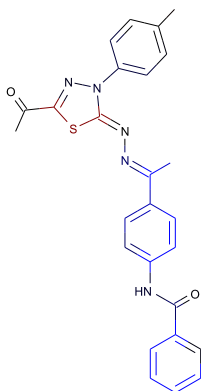

$C_{26}H_{23}N_5O_2S$

Molecular Weight: 469.55811

ALogP: 5.231

Rotatable Bonds: 6

Acceptors: 7

Donors: 1

### Model Prediction

Prediction: 0.0906

Unit: g/kg\_body\_weight

Mahalanobis Distance: 30.9

Mahalanobis Distance p-value: 3e-026

Mahalanobis Distance: The Mahalanobis distance (MD) is a generalization of the Euclidean distance that accounts for correlations among the X properties. It is calculated as the distance to the center of the training data. The larger the MD, the less trustworthy the prediction.

Mahalanobis Distance p-value: The p-value gives the fraction of training data with an MD greater than or equal to the one for the given sample, assuming normally distributed data. The smaller the p-value, the less trustworthy the prediction. For highly non-normal X properties (e.g., fingerprints), the MD p-value is wildly inaccurate.

### Structural Similar Compounds

| Name                        | RHODAMINE 6G | DILTIAZEM | D & C RED 9      |
|-----------------------------|--------------|-----------|------------------|
| Structure                   |              |           |                  |
| Actual Endpoint (-log C)    | 4.54906      | 4.21961   | 3.87715          |
| Predicted Endpoint (-log C) | 4.6787       | 4.005     | 3.6546           |
| Distance                    | 0.716        | 0.717     | 0.721            |
| Reference                   | NTP 364 39   | NDA-18602 | NTP REPORT # 225 |

### Model Applicability

Unknown features are fingerprint features in the query molecule, but not found or appearing too infrequently in the training set.

1. All properties and OPS components are within expected ranges.
2. Unknown ECFP\_6 feature: 912478223: [\*]S[\*]
3. Unknown ECFP\_6 feature: -175146122: [\*]C(=[\*])[c](:[cH]:[\*]):[cH]:[\*]
4. Unknown ECFP\_6 feature: -177077903: [\*]N[c](:[cH]:[\*]):[cH]:[\*]
5. Unknown ECFP\_6 feature: 128986386: [\*]N=C(/C)\c(:[\*]):[\*]
6. Unknown ECFP\_6 feature: 1997021792: [\*]:[cH]:[cH]:[cH]:[\*]
7. Unknown ECFP\_6 feature: 1430169877: [\*]NC(=O)c(:[\*]):[\*]
8. Unknown ECFP\_6 feature: 562081661: [\*]C(=NN=[\*])[\*]
9. Unknown ECFP\_6 feature: -819426257: [\*]C(=NN=[\*])[\*]
10. Unknown ECFP\_6 feature: 189949281: [\*]N=C\1/S[\*]=[\*]N1[\*]
11. Unknown ECFP\_6 feature: 2122741631: [\*]C1=[\*][\*]C(=[\*])S1
12. Unknown ECFP\_6 feature: -934225701: [\*]C(=[\*])C1=N[\*][\*]S1
13. Unknown ECFP\_6 feature: 2092245922: [\*]N1[\*][\*]C(=N1)[\*]
14. Unknown ECFP\_6 feature: -1110911409: [\*]=C1[\*][\*]=NN1[c](:[\*]):[\*]
15. Unknown ECFP\_6 feature: -175021654: [\*]N([\*])c(:[cH]:[\*]):[cH]:[\*]
16. Unknown ECFP\_6 feature: 129482634: [\*]C(=[\*])C(=O)C
17. Unknown ECFP\_6 feature: -179515162: [\*]:[cH]:[c](C):[cH]:[\*]

### Feature Contribution

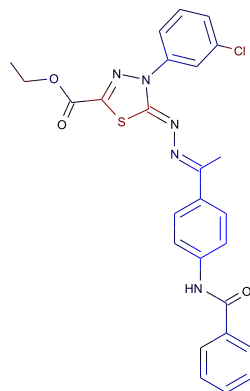

$C_{26}H_{22}ClN_5O_3S$

Molecular Weight: 520.00258

ALogP: 5.883

Rotatable Bonds: 8

Acceptors: 8

Donors: 1

### Model Prediction

Prediction: 0.059

Unit: g/kg\_body\_weight

Mahalanobis Distance: 30.1

Mahalanobis Distance p-value: 6.28e-025

Mahalanobis Distance: The Mahalanobis distance (MD) is a generalization of the Euclidean distance that accounts for correlations among the X properties. It is calculated as the distance to the center of the training data. The larger the MD, the less trustworthy the prediction.

Mahalanobis Distance p-value: The p-value gives the fraction of training data with an MD greater than or equal to the one for the given sample, assuming normally distributed data. The smaller the p-value, the less trustworthy the prediction. For highly non-normal X properties (e.g., fingerprints), the MD p-value is wildly inaccurate.

### Structural Similar Compounds

| Name                        | FLUVALINATE                        | RESERPINE  | DIARYLANILIDE YELLOW |
|-----------------------------|------------------------------------|------------|----------------------|
| Structure                   |                                    |            |                      |
| Actual Endpoint (-log C)    | 5.30356                            | 6.38645    | 2.70208              |
| Predicted Endpoint (-log C) | 4.89944                            | 5.548      | 3.76154              |
| Distance                    | 0.694                              | 0.705      | 0.726                |
| Reference                   | EPA COVER SHEET<br>0281;880630;(1) | NTP 193 22 | NTP 30 C-4           |

### Model Applicability

Unknown features are fingerprint features in the query molecule, but not found or appearing too infrequently in the training set.

1. All properties and OPS components are within expected ranges.
2. Unknown ECFP\_6 feature: 912478223: [\*]S[\*]
3. Unknown ECFP\_6 feature: -175146122: [\*]C(=[\*])[c](:[cH]:[\*]):[cH]:[\*]
4. Unknown ECFP\_6 feature: -177077903: [\*]N[c](:[cH]:[\*]):[cH]:[\*]
5. Unknown ECFP\_6 feature: 128986386: [\*]N=C(/C)\[c](:[\*]):[\*]
6. Unknown ECFP\_6 feature: 1430169877: [\*]NC(=O)[c](:[\*]):[\*]
7. Unknown ECFP\_6 feature: 562081661: [\*]C(=NN=[\*])[\*]
8. Unknown ECFP\_6 feature: -819426257: [\*]C(=NN=[\*])[\*]
9. Unknown ECFP\_6 feature: 189949281: [\*]N=C\1/S[\*]=[\*]N1[\*]
10. Unknown ECFP\_6 feature: 2122741631: [\*]C1=[\*][\*]C(=[\*])S1
11. Unknown ECFP\_6 feature: -934225701: [\*]C(=[\*])C1=N[\*][\*]S1
12. Unknown ECFP\_6 feature: 2092245922: [\*]N1[\*][\*]C(=N1)[\*]
13. Unknown ECFP\_6 feature: -1110911409: [\*]=C1[\*][\*]=NN1[c](:[\*]):[\*]
14. Unknown ECFP\_6 feature: -175021654: [\*]N([\*])[c](:[cH]:[\*]):[cH]:[\*]
15. Unknown ECFP\_6 feature: 1430791942: [\*]OC(=O)C(=[\*])[\*]
16. Unknown ECFP\_6 feature: -176494269: [\*]:[cH]:[c](Cl):[cH]:[\*]
17. Unknown ECFP\_6 feature: 1997021792: [\*]:[cH]:[cH]:[cH]:[\*]
18. Unknown ECFP\_6 feature: -949601813: [\*]OCC
19. Unknown ECFP\_6 feature: 99947387: [\*]:[c](:[\*])Cl



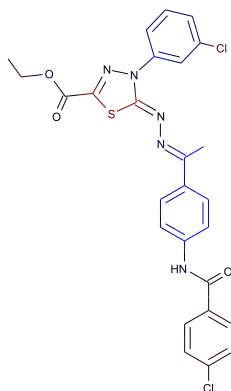

$C_{26}H_{21}Cl_2N_5O_3S$

Molecular Weight: 554.44763

ALogP: 6.547

Rotatable Bonds: 8

Acceptors: 8

Donors: 1

### Model Prediction

Prediction: 0.0336

Unit: g/kg\_body\_weight

Mahalanobis Distance: 30.3

Mahalanobis Distance p-value: 2.68e-025

Mahalanobis Distance: The Mahalanobis distance (MD) is a generalization of the Euclidean distance that accounts for correlations among the X properties. It is calculated as the distance to the center of the training data. The larger the MD, the less trustworthy the prediction.

Mahalanobis Distance p-value: The p-value gives the fraction of training data with an MD greater than or equal to the one for the given sample, assuming normally distributed data. The smaller the p-value, the less trustworthy the prediction. For highly non-normal X properties (e.g., fingerprints), the MD p-value is wildly inaccurate.

### Structural Similar Compounds

| Name                        | FLUVALINATE                        | DIARYLANILIDE YELLOW | RESERPINE  |
|-----------------------------|------------------------------------|----------------------|------------|
| Structure                   |                                    |                      |            |
| Actual Endpoint (-log C)    | 5.30356                            | 2.70208              | 6.38645    |
| Predicted Endpoint (-log C) | 4.89944                            | 3.76154              | 5.548      |
| Distance                    | 0.692                              | 0.694                | 0.710      |
| Reference                   | EPA COVER SHEET<br>0281;880630;(1) | NTP 30 C-4           | NTP 193 22 |

### Model Applicability

Unknown features are fingerprint features in the query molecule, but not found or appearing too infrequently in the training set.

1. All properties and OPS components are within expected ranges.
2. Unknown ECFP\_6 feature: 912478223: [\*]S[\*]
3. Unknown ECFP\_6 feature: -175146122: [\*]C(=[\*])[c](:[cH]:[\*]):[cH]:[\*]
4. Unknown ECFP\_6 feature: -177077903: [\*]N[c](:[cH]:[\*]):[cH]:[\*]
5. Unknown ECFP\_6 feature: 128986386: [\*]N=C(/C)\[c](:[\*]):[\*]
6. Unknown ECFP\_6 feature: 1430169877: [\*]NC(=O)[c](:[\*]):[\*]
7. Unknown ECFP\_6 feature: 562081661: [\*]C(=NN=[\*])[\*]
8. Unknown ECFP\_6 feature: -819426257: [\*]C(=NN=[\*])[\*]
9. Unknown ECFP\_6 feature: 189949281: [\*]N=C\1/S[\*]=[\*]N1[\*]
10. Unknown ECFP\_6 feature: 2122741631: [\*]C1=[\*][\*]C(=[\*])S1
11. Unknown ECFP\_6 feature: -934225701: [\*]C(=[\*])C1=N[\*][\*]S1
12. Unknown ECFP\_6 feature: 2092245922: [\*]N1[\*][\*]C(=N1)[\*]
13. Unknown ECFP\_6 feature: -1110911409: [\*]=C1[\*][\*]=NN1[c](:[\*]):[\*]
14. Unknown ECFP\_6 feature: -175021654: [\*]N([\*])[c](:[cH]:[\*]):[cH]:[\*]
15. Unknown ECFP\_6 feature: 1430791942: [\*]OC(=O)C(=[\*])[\*]
16. Unknown ECFP\_6 feature: -176494269: [\*]:[cH]:[c](Cl):[cH]:[\*]
17. Unknown ECFP\_6 feature: 1997021792: [\*]:[cH]:[cH]:[cH]:[\*]
18. Unknown ECFP\_6 feature: -949601813: [\*]OCC
19. Unknown ECFP\_6 feature: 99947387: [\*]:[c](:[\*])Cl



# Sorafenib

# TOPKAT\_Chronic\_LOAEL

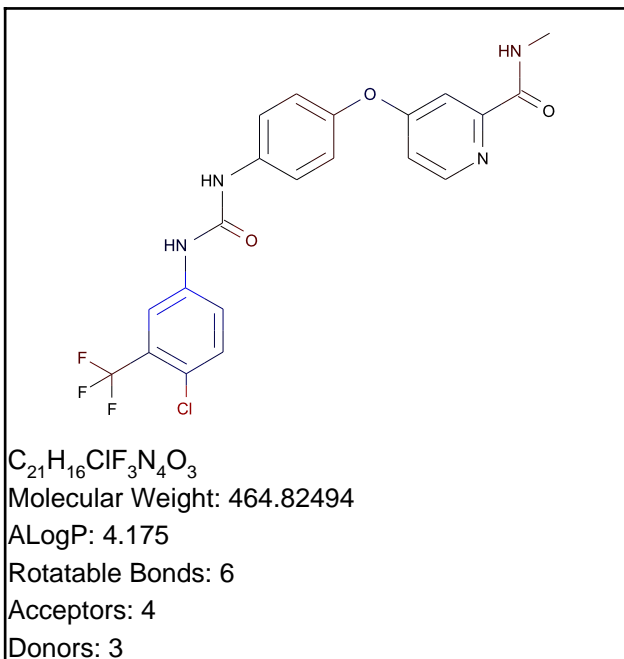

## Model Prediction

Prediction: 0.00483

Unit: g/kg\_body\_weight

Mahalanobis Distance: 30

Mahalanobis Distance p-value: 1.21e-024

Mahalanobis Distance: The Mahalanobis distance (MD) is a generalization of the Euclidean distance that accounts for correlations among the X properties. It is calculated as the distance to the center of the training data. The larger the MD, the less trustworthy the prediction.

Mahalanobis Distance p-value: The p-value gives the fraction of training data with an MD greater than or equal to the one for the given sample, assuming normally distributed data. The smaller the p-value, the less trustworthy the prediction. For highly non-normal X properties (e.g., fingerprints), the MD p-value is wildly inaccurate.

## Structural Similar Compounds

| Name                        | GLYBURIDE                                                                           | D & C RED 9                                                                         | SODIUM ACIFLUORFEN                                                                  |
|-----------------------------|-------------------------------------------------------------------------------------|-------------------------------------------------------------------------------------|-------------------------------------------------------------------------------------|
| Structure                   | 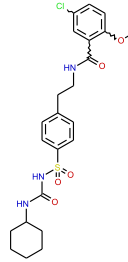 |  |  |
| Actual Endpoint (-log C)    | 4.21661                                                                             | 3.87715                                                                             | 4.16036                                                                             |
| Predicted Endpoint (-log C) | 4.21035                                                                             | 3.6546                                                                              | 4.65915                                                                             |
| Distance                    | 0.636                                                                               | 0.722                                                                               | 0.736                                                                               |
| Reference                   | UPJ-26452                                                                           | NTP REPORT # 225                                                                    | EPA COVER SHEET 0192;891101;(1)                                                     |

## Model Applicability

Unknown features are fingerprint features in the query molecule, but not found or appearing too infrequently in the training set.

1. All properties and OPS components are within expected ranges.
2. Unknown ECFP\_6 feature: -1046436026: [\*]F
3. Unknown ECFP\_6 feature: 99947387: [\*]:c(:[\*])Cl
4. Unknown ECFP\_6 feature: 226796801: [\*]C([\*])([\*])F
5. Unknown ECFP\_6 feature: 1305253718: [\*]:c(:[\*])O[c(:[\*]):[\*]]
6. Unknown ECFP\_6 feature: -677309799: [\*]:c(:[\*]):n:[cH]:[\*]
7. Unknown ECFP\_6 feature: 1338334141: [\*]C(=[\*])NC
8. Unknown ECFP\_6 feature: -177077903: [\*]N[c(:[cH]:[\*]):[cH]:[\*]]
9. Unknown ECFP\_6 feature: 1336678434: [\*]:c(:[\*]):c(:[cH]:[\*])C([\*])([\*])[\*]
10. Unknown ECFP\_6 feature: -649580166: [\*]NC(=O)N[\*]
11. Unknown ECFP\_6 feature: -1952889961: [\*]:c(:[\*])C(F)(F)F
12. Unknown ECFP\_6 feature: 1413420509: [\*]C(=[\*])[c(:[cH]:[\*]):n:[\*]]
13. Unknown ECFP\_6 feature: 1996163143: [\*]:[cH]:[cH]:n:[\*]
14. Unknown ECFP\_6 feature: 1430169877: [\*]NC(=O)[c(:[\*]):[\*]]
15. Unknown ECFP\_6 feature: 864287155: [\*]NC

## Feature Contribution

Top features for positive contribution

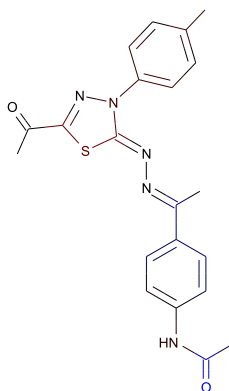

$C_{21}H_{21}N_5O_2S$

Molecular Weight: 407.48873

ALogP: 3.566

Rotatable Bonds: 5

Acceptors: 7

Donors: 1

### Model Prediction

Prediction: 0.0441

Unit: g/kg\_body\_weight

Mahalanobis Distance: 10.2

Mahalanobis Distance p-value: 2.48e-005

Mahalanobis Distance: The Mahalanobis distance (MD) is a generalization of the Euclidean distance that accounts for correlations among the X properties. It is calculated as the distance to the center of the training data. The larger the MD, the less trustworthy the prediction.

Mahalanobis Distance p-value: The p-value gives the fraction of training data with an MD greater than or equal to the one for the given sample, assuming normally distributed data. The smaller the p-value, the less trustworthy the prediction. For highly non-normal X properties (e.g., fingerprints), the MD p-value is wildly inaccurate.

### Structural Similar Compounds

| Name                        | COUMAPHOS     | DISPERSE YELLOW 3 | AZINPHOSMETHYL |
|-----------------------------|---------------|-------------------|----------------|
| Structure                   |               |                   |                |
| Actual Endpoint (-log C)    | 5.60537       | 2.77703           | 4.65515        |
| Predicted Endpoint (-log C) | 4.15004       | 2.80195           | 4.22281        |
| Distance                    | 0.608         | 0.649             | 0.670          |
| Reference                   | NCI/NTP TR-96 | NCI/NTP TR-222    | NCI/NTP TR-69  |

### Model Applicability

Unknown features are fingerprint features in the query molecule, but not found or appearing too infrequently in the training set.

1. All properties and OPS components are within expected ranges.

### Feature Contribution

#### Top features for positive contribution

| Fingerprint | Bit/Smiles  | Feature Structure                      | Score |
|-------------|-------------|----------------------------------------|-------|
| FCFP_2      | -1143715940 | <br><chem>[*]C1=[*][*]C(=[*])S1</chem> | 0.095 |

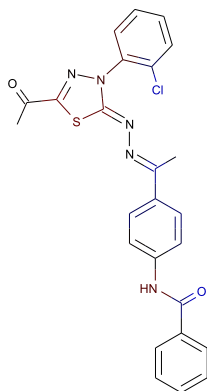

$C_{25}H_{20}ClN_5O_2S$

Molecular Weight: 489.97659

ALogP: 5.409

Rotatable Bonds: 6

Acceptors: 7

Donors: 1

### Model Prediction

Prediction: 0.0624

Unit: g/kg\_body\_weight

Mahalanobis Distance: 9.31

Mahalanobis Distance p-value: 0.000508

Mahalanobis Distance: The Mahalanobis distance (MD) is a generalization of the Euclidean distance that accounts for correlations among the X properties. It is calculated as the distance to the center of the training data. The larger the MD, the less trustworthy the prediction.

Mahalanobis Distance p-value: The p-value gives the fraction of training data with an MD greater than or equal to the one for the given sample, assuming normally distributed data. The smaller the p-value, the less trustworthy the prediction. For highly non-normal X properties (e.g., fingerprints), the MD p-value is wildly inaccurate.

### Structural Similar Compounds

| Name                        | C.I.PIGMENT RED 3 | RESERPINE      | ROTENONE       |
|-----------------------------|-------------------|----------------|----------------|
| Structure                   |                   |                |                |
| Actual Endpoint (-log C)    | 2.65635           | 6.13118        | 5.06769        |
| Predicted Endpoint (-log C) | 2.97957           | 4.38304        | 4.11907        |
| Distance                    | 0.773             | 0.780          | 0.815          |
| Reference                   | NCI/NTP TR-407    | NCI/NTP TR-193 | NCI/NTP TR-320 |

### Model Applicability

Unknown features are fingerprint features in the query molecule, but not found or appearing too infrequently in the training set.

- OPS PC5 out of range. Value: 5.2711. Training min, max, SD, explained variance: -3.3892, 5.0834, 1.644, 0.0611.

### Feature Contribution

#### Top features for positive contribution

| Fingerprint | Bit/Smiles  | Feature Structure         | Score |
|-------------|-------------|---------------------------|-------|
| FCFP_2      | -1143715940 | <br>[*]C1=[*][*]C(=[*])S1 | 0.095 |

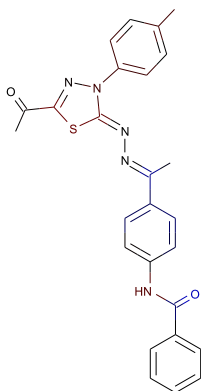

$C_{26}H_{23}N_5O_2S$

Molecular Weight: 469.55811

ALogP: 5.231

Rotatable Bonds: 6

Acceptors: 7

Donors: 1

### Model Prediction

Prediction: 0.0423

Unit: g/kg\_body\_weight

Mahalanobis Distance: 9.28

Mahalanobis Distance p-value: 0.000577

Mahalanobis Distance: The Mahalanobis distance (MD) is a generalization of the Euclidean distance that accounts for correlations among the X properties. It is calculated as the distance to the center of the training data. The larger the MD, the less trustworthy the prediction.

Mahalanobis Distance p-value: The p-value gives the fraction of training data with an MD greater than or equal to the one for the given sample, assuming normally distributed data. The smaller the p-value, the less trustworthy the prediction. For highly non-normal X properties (e.g., fingerprints), the MD p-value is wildly inaccurate.

### Structural Similar Compounds

| Name                        | C.I.PIGMENT RED 3 | RESERPINE      | ROTENONE       |
|-----------------------------|-------------------|----------------|----------------|
| Structure                   |                   |                |                |
| Actual Endpoint (-log C)    | 2.65635           | 6.13118        | 5.06769        |
| Predicted Endpoint (-log C) | 2.97957           | 4.38304        | 4.11907        |
| Distance                    | 0.714             | 0.788          | 0.789          |
| Reference                   | NCI/NTP TR-407    | NCI/NTP TR-193 | NCI/NTP TR-320 |

### Model Applicability

Unknown features are fingerprint features in the query molecule, but not found or appearing too infrequently in the training set.

1. All properties and OPS components are within expected ranges.

### Feature Contribution

#### Top features for positive contribution

| Fingerprint | Bit/Smiles  | Feature Structure                      | Score |
|-------------|-------------|----------------------------------------|-------|
| FCFP_2      | -1143715940 | <br><chem>[*]C1=[*][*]C(=[*])S1</chem> | 0.095 |

21a

TOPKAT\_Rat\_Maximum\_Tolerated\_Dose\_Feed

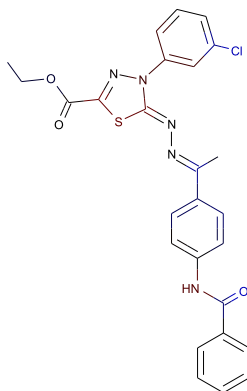C<sub>26</sub>H<sub>22</sub>ClN<sub>5</sub>O<sub>3</sub>S

Molecular Weight: 520.00258

ALogP: 5.883

Rotatable Bonds: 8

Acceptors: 8

Donors: 1

### Model Prediction

Prediction: 0.0811

Unit: g/kg\_body\_weight

Mahalanobis Distance: 9.03

Mahalanobis Distance p-value: 0.0013

Mahalanobis Distance: The Mahalanobis distance (MD) is a generalization of the Euclidean distance that accounts for correlations among the X properties. It is calculated as the distance to the center of the training data. The larger the MD, the less trustworthy the prediction.

Mahalanobis Distance p-value: The p-value gives the fraction of training data with an MD greater than or equal to the one for the given sample, assuming normally distributed data. The smaller the p-value, the less trustworthy the prediction. For highly non-normal X properties (e.g., fingerprints), the MD p-value is wildly inaccurate.

### Structural Similar Compounds

| Name                        | RESERPINE      | C.I.PIGMENT RED 23 | COUMAPHOS     |
|-----------------------------|----------------|--------------------|---------------|
| Structure                   |                |                    |               |
| Actual Endpoint (-log C)    | 6.13118        | 2.30052            | 5.60537       |
| Predicted Endpoint (-log C) | 4.38304        | 3.55333            | 4.15004       |
| Distance                    | 0.670          | 0.810              | 0.868         |
| Reference                   | NCI/NTP TR-193 | NCI/NTP TR-411     | NCI/NTP TR-96 |

### Model Applicability

Unknown features are fingerprint features in the query molecule, but not found or appearing too infrequently in the training set.

1. OPS PC5 out of range. Value: 5.4937. Training min, max, SD, explained variance: -3.3892, 5.0834, 1.644, 0.0611.

### Feature Contribution

#### Top features for positive contribution

| Fingerprint | Bit/Smiles  | Feature Structure                      | Score |
|-------------|-------------|----------------------------------------|-------|
| FCFP_2      | -1143715940 | <br><chem>[*]C1=[*][*]C(=[*])S1</chem> | 0.095 |

21b

TOPKAT\_Rat\_Maximum\_Tolerated\_Dose\_Feed

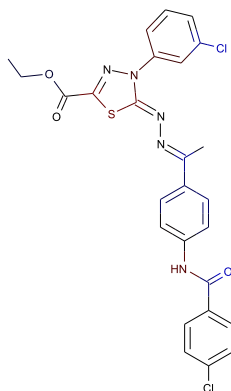C<sub>26</sub>H<sub>21</sub>Cl<sub>2</sub>N<sub>5</sub>O<sub>3</sub>S

Molecular Weight: 554.44763

ALogP: 6.547

Rotatable Bonds: 8

Acceptors: 8

Donors: 1

### Model Prediction

Prediction: 0.0644

Unit: g/kg\_body\_weight

Mahalanobis Distance: 8.99

Mahalanobis Distance p-value: 0.00146

Mahalanobis Distance: The Mahalanobis distance (MD) is a generalization of the Euclidean distance that accounts for correlations among the X properties. It is calculated as the distance to the center of the training data. The larger the MD, the less trustworthy the prediction.

Mahalanobis Distance p-value: The p-value gives the fraction of training data with an MD greater than or equal to the one for the given sample, assuming normally distributed data. The smaller the p-value, the less trustworthy the prediction. For highly non-normal X properties (e.g., fingerprints), the MD p-value is wildly inaccurate.

### Structural Similar Compounds

| Name                        | RESERPINE      | C.I.PIGMENT RED 23 | COUMAPHOS     |
|-----------------------------|----------------|--------------------|---------------|
| Structure                   |                |                    |               |
| Actual Endpoint (-log C)    | 6.13118        | 2.30052            | 5.60537       |
| Predicted Endpoint (-log C) | 4.38304        | 3.55333            | 4.15004       |
| Distance                    | 0.682          | 0.827              | 0.915         |
| Reference                   | NCI/NTP TR-193 | NCI/NTP TR-411     | NCI/NTP TR-96 |

### Model Applicability

Unknown features are fingerprint features in the query molecule, but not found or appearing too infrequently in the training set.

- OPS PC5 out of range. Value: 5.6115. Training min, max, SD, explained variance: -3.3892, 5.0834, 1.644, 0.0611.

### Feature Contribution

#### Top features for positive contribution

| Fingerprint | Bit/Smiles  | Feature Structure                      | Score |
|-------------|-------------|----------------------------------------|-------|
| FCFP_2      | -1143715940 | <br><chem>[*]C1=[*][*]C(=[*])S1</chem> | 0.095 |

# Sorafenib

# TOPKAT\_Rat\_Maximum\_Tolerated\_Dose\_Feed

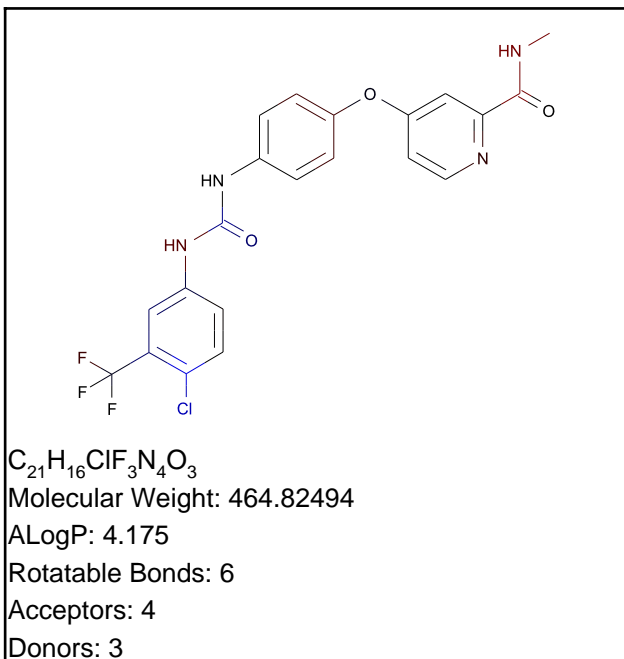

## Model Prediction

Prediction: 0.0885

Unit: g/kg\_body\_weight

Mahalanobis Distance: 12.4

Mahalanobis Distance p-value: 1.76e-009

Mahalanobis Distance: The Mahalanobis distance (MD) is a generalization of the Euclidean distance that accounts for correlations among the X properties. It is calculated as the distance to the center of the training data. The larger the MD, the less trustworthy the prediction.

Mahalanobis Distance p-value: The p-value gives the fraction of training data with an MD greater than or equal to the one for the given sample, assuming normally distributed data. The smaller the p-value, the less trustworthy the prediction. For highly non-normal X properties (e.g., fingerprints), the MD p-value is wildly inaccurate.

## Structural Similar Compounds

| Name                        | FUROSEMIDE                                                                          | PHENOLPHTHALEIN                                                                     | DISPERSE YELLOW 3                                                                   |
|-----------------------------|-------------------------------------------------------------------------------------|-------------------------------------------------------------------------------------|-------------------------------------------------------------------------------------|
| Structure                   | 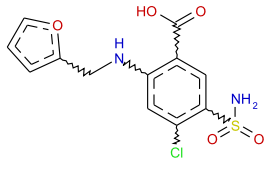 |  |  |
| Actual Endpoint (-log C)    | 4.04236                                                                             | 2.20184                                                                             | 2.77703                                                                             |
| Predicted Endpoint (-log C) | 2.8614                                                                              | 2.8857                                                                              | 2.80195                                                                             |
| Distance                    | 0.741                                                                               | 0.780                                                                               | 0.799                                                                               |
| Reference                   | NCI/NTP TR-356                                                                      | NCI/NTP TR-465                                                                      | NCI/NTP TR-222                                                                      |

## Model Applicability

Unknown features are fingerprint features in the query molecule, but not found or appearing too infrequently in the training set.

- All properties and OPS components are within expected ranges.

## Feature Contribution

### Top features for positive contribution

| Fingerprint | Bit/Smiles | Feature Structure                                                                                                  | Score |
|-------------|------------|--------------------------------------------------------------------------------------------------------------------|-------|
| FCFP_2      | -885550502 | 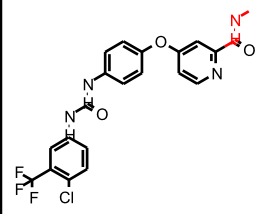<br><chem>[*]C(=[*])NC</chem> | 0.115 |

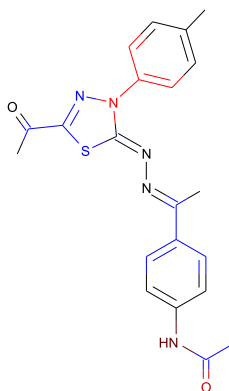

$C_{21}H_{21}N_5O_2S$

Molecular Weight: 407.48873

ALogP: 3.566

Rotatable Bonds: 5

Acceptors: 7

Donors: 1

### Model Prediction

Prediction: 0.00165

Unit: g/kg\_body\_weight

Mahalanobis Distance: 9.37

Mahalanobis Distance p-value: 4.04e-005

Mahalanobis Distance: The Mahalanobis distance (MD) is a generalization of the Euclidean distance that accounts for correlations among the X properties. It is calculated as the distance to the center of the training data. The larger the MD, the less trustworthy the prediction.

Mahalanobis Distance p-value: The p-value gives the fraction of training data with an MD greater than or equal to the one for the given sample, assuming normally distributed data. The smaller the p-value, the less trustworthy the prediction. For highly non-normal X properties (e.g., fingerprints), the MD p-value is wildly inaccurate.

### Structural Similar Compounds

| Name                        | PENICILLIN VK  | OCHRATOXIN     | SULFISOOXAZOLE |
|-----------------------------|----------------|----------------|----------------|
| Structure                   |                |                |                |
| Actual Endpoint (-log C)    | 2.54455        | 6.28396        | 2.82494        |
| Predicted Endpoint (-log C) | 3.9702         | 5.12358        | 3.0705         |
| Distance                    | 0.812          | 0.841          | 0.905          |
| Reference                   | NCI/NTP TR-336 | NCI/NTP TR-358 | NCI/NTP TR-138 |

### Model Applicability

Unknown features are fingerprint features in the query molecule, but not found or appearing too infrequently in the training set.

1. Num\_H\_Acceptors out of range. Value: 7. Training min, max, mean, SD: 0, 6, 1.6146, 1.644.
2. OPS\_PC6 out of range. Value: -2.7424. Training min, max, SD, explained variance: -2.4321, 2.9885, 1.256, 0.0488.
3. Unknown FCFP\_2 feature: -1549192822: [\*]N=C(/C)\[c](:[\*]):[\*]
4. Unknown FCFP\_2 feature: 580960234: [\*]C(=NN=[\*])[\*]
5. Unknown FCFP\_2 feature: -1986158408: [\*]N=C\1/S[\*]=[\*]N1[\*]

### Feature Contribution

#### Top features for positive contribution

| Fingerprint | Bit/Smiles | Feature Structure                        | Score |
|-------------|------------|------------------------------------------|-------|
| FCFP_2      | 332760439  | <br>[*]N([*])[c](:[cH]:[*]<br>):[cH]:[*] | 0.672 |



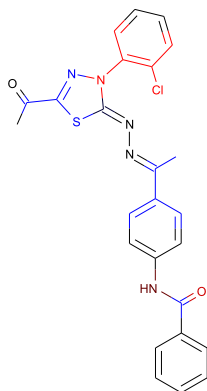

$C_{25}H_{20}ClN_5O_2S$

Molecular Weight: 489.97659

ALogP: 5.409

Rotatable Bonds: 6

Acceptors: 7

Donors: 1

### Model Prediction

Prediction: 9.28e-005

Unit: g/kg\_body\_weight

Mahalanobis Distance: 9.54

Mahalanobis Distance p-value: 2.35e-005

Mahalanobis Distance: The Mahalanobis distance (MD) is a generalization of the Euclidean distance that accounts for correlations among the X properties. It is calculated as the distance to the center of the training data. The larger the MD, the less trustworthy the prediction.

Mahalanobis Distance p-value: The p-value gives the fraction of training data with an MD greater than or equal to the one for the given sample, assuming normally distributed data. The smaller the p-value, the less trustworthy the prediction. For highly non-normal X properties (e.g., fingerprints), the MD p-value is wildly inaccurate.

### Structural Similar Compounds

| Name                        | OCHRATOXIN     | PENICILLIN VK  | SULFISOOXAZOLE |
|-----------------------------|----------------|----------------|----------------|
| Structure                   |                |                |                |
| Actual Endpoint (-log C)    | 6.28396        | 2.54455        | 2.82494        |
| Predicted Endpoint (-log C) | 5.12358        | 3.9702         | 3.0705         |
| Distance                    | 0.912          | 1.169          | 1.199          |
| Reference                   | NCI/NTP TR-358 | NCI/NTP TR-336 | NCI/NTP TR-138 |

### Model Applicability

Unknown features are fingerprint features in the query molecule, but not found or appearing too infrequently in the training set.

1. Molecular\_Weight out of range. Value: 489.98. Training min, max, mean, SD: 68.074, 434.63, 171.13, 85.06.
2. Num\_H\_Acceptors out of range. Value: 7. Training min, max, mean, SD: 0, 6, 1.6146, 1.644.
3. Num\_AromaticRings out of range. Value: 3. Training min, max, mean, SD: 0, 2, 0.5625, 0.693.
4. OPS PC5 out of range. Value: -3.4295. Training min, max, SD, explained variance: -3.4, 4.1587, 1.489, 0.0686.
5. OPS PC10 out of range. Value: 2.8007. Training min, max, SD, explained variance: -3.9696, 2.3971, 0.982, 0.0298.
6. Unknown FCFP\_2 feature: -1549192822: [\*]N=C(/C)\[c](:[\*]):[\*]
7. Unknown FCFP\_2 feature: 580960234: [\*]C(=NN=[\*])[\*]
8. Unknown FCFP\_2 feature: -1986158408: [\*]N=C\1/S[\*]=[\*]N1[\*]

### Feature Contribution

#### Top features for positive contribution

| Fingerprint | Bit/Smiles | Feature Structure | Score |
|-------------|------------|-------------------|-------|
|             |            |                   |       |

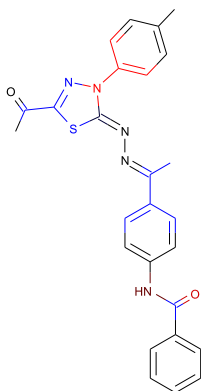

$C_{26}H_{23}N_5O_2S$

Molecular Weight: 469.55811

ALogP: 5.231

Rotatable Bonds: 6

Acceptors: 7

Donors: 1

### Model Prediction

Prediction: 0.000884

Unit: g/kg\_body\_weight

Mahalanobis Distance: 11.2

Mahalanobis Distance p-value: 1.4e-007

Mahalanobis Distance: The Mahalanobis distance (MD) is a generalization of the Euclidean distance that accounts for correlations among the X properties. It is calculated as the distance to the center of the training data. The larger the MD, the less trustworthy the prediction.

Mahalanobis Distance p-value: The p-value gives the fraction of training data with an MD greater than or equal to the one for the given sample, assuming normally distributed data. The smaller the p-value, the less trustworthy the prediction. For highly non-normal X properties (e.g., fingerprints), the MD p-value is wildly inaccurate.

### Structural Similar Compounds

| Name                        | OCHRATOXIN     | SULFISOOXAZOLE | PENICILLIN VK  |
|-----------------------------|----------------|----------------|----------------|
| Structure                   |                |                |                |
| Actual Endpoint (-log C)    | 6.28396        | 2.82494        | 2.54455        |
| Predicted Endpoint (-log C) | 5.12358        | 3.0705         | 3.9702         |
| Distance                    | 0.946          | 1.128          | 1.134          |
| Reference                   | NCI/NTP TR-358 | NCI/NTP TR-138 | NCI/NTP TR-336 |

### Model Applicability

Unknown features are fingerprint features in the query molecule, but not found or appearing too infrequently in the training set.

1. Molecular\_Weight out of range. Value: 469.56. Training min, max, mean, SD: 68.074, 434.63, 171.13, 85.06.
2. Num\_H\_Acceptors out of range. Value: 7. Training min, max, mean, SD: 0, 6, 1.6146, 1.644.
3. Num\_AromaticRings out of range. Value: 3. Training min, max, mean, SD: 0, 2, 0.5625, 0.693.
4. OPS\_PC6 out of range. Value: -3.2324. Training min, max, SD, explained variance: -2.4321, 2.9885, 1.256, 0.0488.
5. Unknown FCFP\_2 feature: -1549192822: [\*]\N=C(/C)\[c](:[\*]):[\*]
6. Unknown FCFP\_2 feature: 580960234: [\*]C(=NN=[\*])[\*]
7. Unknown FCFP\_2 feature: -1986158408: [\*]\N=C\1/S[\*]=[\*]N1[\*]

### Feature Contribution

#### Top features for positive contribution

| Fingerprint | Bit/Smiles | Feature Structure | Score |
|-------------|------------|-------------------|-------|
|             |            |                   |       |

21a

TOPKAT\_Rat\_Maximum\_Tolerated\_Dose\_Gavage

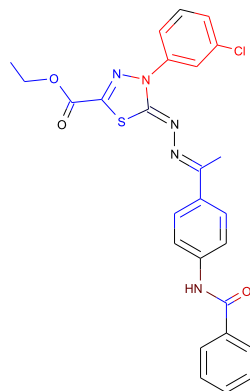C<sub>26</sub>H<sub>22</sub>ClN<sub>5</sub>O<sub>3</sub>S

Molecular Weight: 520.00258

ALogP: 5.883

Rotatable Bonds: 8

Acceptors: 8

Donors: 1

### Model Prediction

Prediction: 7.5e-005

Unit: g/kg\_body\_weight

Mahalanobis Distance: 10

Mahalanobis Distance p-value: 5.06e-006

Mahalanobis Distance: The Mahalanobis distance (MD) is a generalization of the Euclidean distance that accounts for correlations among the X properties. It is calculated as the distance to the center of the training data. The larger the MD, the less trustworthy the prediction.

Mahalanobis Distance p-value: The p-value gives the fraction of training data with an MD greater than or equal to the one for the given sample, assuming normally distributed data. The smaller the p-value, the less trustworthy the prediction. For highly non-normal X properties (e.g., fingerprints), the MD p-value is wildly inaccurate.

### Structural Similar Compounds

| Name                        | OCHRATOXIN     | PENICILLIN VK  | PROBENECID     |
|-----------------------------|----------------|----------------|----------------|
| Structure                   |                |                |                |
| Actual Endpoint (-log C)    | 6.28396        | 2.54455        | 2.85333        |
| Predicted Endpoint (-log C) | 5.12358        | 3.9702         | 2.4258         |
| Distance                    | 1.000          | 1.239          | 1.326          |
| Reference                   | NCI/NTP TR-358 | NCI/NTP TR-336 | NCI/NTP TR-395 |

### Model Applicability

Unknown features are fingerprint features in the query molecule, but not found or appearing too infrequently in the training set.

1. Molecular\_Weight out of range. Value: 520. Training min, max, mean, SD: 68.074, 434.63, 171.13, 85.06.
2. Num\_H\_Acceptors out of range. Value: 8. Training min, max, mean, SD: 0, 6, 1.6146, 1.644.
3. Num\_AromaticRings out of range. Value: 3. Training min, max, mean, SD: 0, 2, 0.5625, 0.693.
4. OPS PC3 out of range. Value: 5.2566. Training min, max, SD, explained variance: -4.6235, 5.1158, 1.773, 0.0972.
5. OPS PC5 out of range. Value: -3.8416. Training min, max, SD, explained variance: -3.4, 4.1587, 1.489, 0.0686.
6. OPS PC10 out of range. Value: 2.749. Training min, max, SD, explained variance: -3.9696, 2.3971, 0.982, 0.0298.
7. Unknown FCFP\_2 feature: -1549192822: [\*]N=C(/C)\[c](:[\*]):[\*]
8. Unknown FCFP\_2 feature: 580960234: [\*]C(=NN=[\*])[\*]
9. Unknown FCFP\_2 feature: -1986158408: [\*]N=C\1/S[\*]=[\*]N1[\*]

### Feature Contribution

#### Top features for positive contribution

| Fingerprint | Bit/Smiles | Feature Structure | Score |
|-------------|------------|-------------------|-------|
|             |            |                   |       |

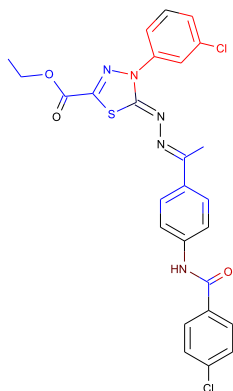

$C_{26}H_{21}Cl_2N_5O_3S$

Molecular Weight: 554.44763

ALogP: 6.547

Rotatable Bonds: 8

Acceptors: 8

Donors: 1

### Model Prediction

Prediction: 5.17e-005

Unit: g/kg\_body\_weight

Mahalanobis Distance: 10.3

Mahalanobis Distance p-value: 2.23e-006

Mahalanobis Distance: The Mahalanobis distance (MD) is a generalization of the Euclidean distance that accounts for correlations among the X properties. It is calculated as the distance to the center of the training data. The larger the MD, the less trustworthy the prediction.

Mahalanobis Distance p-value: The p-value gives the fraction of training data with an MD greater than or equal to the one for the given sample, assuming normally distributed data. The smaller the p-value, the less trustworthy the prediction. For highly non-normal X properties (e.g., fingerprints), the MD p-value is wildly inaccurate.

### Structural Similar Compounds

| Name                        | OCHRATOXIN     | PENICILLIN VK  | PROBENECID     |
|-----------------------------|----------------|----------------|----------------|
| Structure                   |                |                |                |
| Actual Endpoint (-log C)    | 6.28396        | 2.54455        | 2.85333        |
| Predicted Endpoint (-log C) | 5.12358        | 3.9702         | 2.4258         |
| Distance                    | 1.059          | 1.313          | 1.396          |
| Reference                   | NCI/NTP TR-358 | NCI/NTP TR-336 | NCI/NTP TR-395 |

### Model Applicability

Unknown features are fingerprint features in the query molecule, but not found or appearing too infrequently in the training set.

1. Molecular\_Weight out of range. Value: 554.45. Training min, max, mean, SD: 68.074, 434.63, 171.13, 85.06.
2. Num\_H\_Acceptors out of range. Value: 8. Training min, max, mean, SD: 0, 6, 1.6146, 1.644.
3. Num\_AromaticRings out of range. Value: 3. Training min, max, mean, SD: 0, 2, 0.5625, 0.693.
4. OPS PC3 out of range. Value: 5.4618. Training min, max, SD, explained variance: -4.6235, 5.1158, 1.773, 0.0972.
5. OPS PC5 out of range. Value: -3.8598. Training min, max, SD, explained variance: -3.4, 4.1587, 1.489, 0.0686.
6. OPS PC10 out of range. Value: 2.6215. Training min, max, SD, explained variance: -3.9696, 2.3971, 0.982, 0.0298.
7. Unknown FCFP\_2 feature: -1549192822: [\*]N=C(/C)\[c](:[\*]):[\*]
8. Unknown FCFP\_2 feature: 580960234: [\*]C(=NN=[\*])[\*]
9. Unknown FCFP\_2 feature: -1986158408: [\*]N=C\1/S[\*]=[\*]N1[\*]

### Feature Contribution

#### Top features for positive contribution

| Fingerprint | Bit/Smiles | Feature Structure | Score |
|-------------|------------|-------------------|-------|
|             |            |                   |       |

# Sorafenib

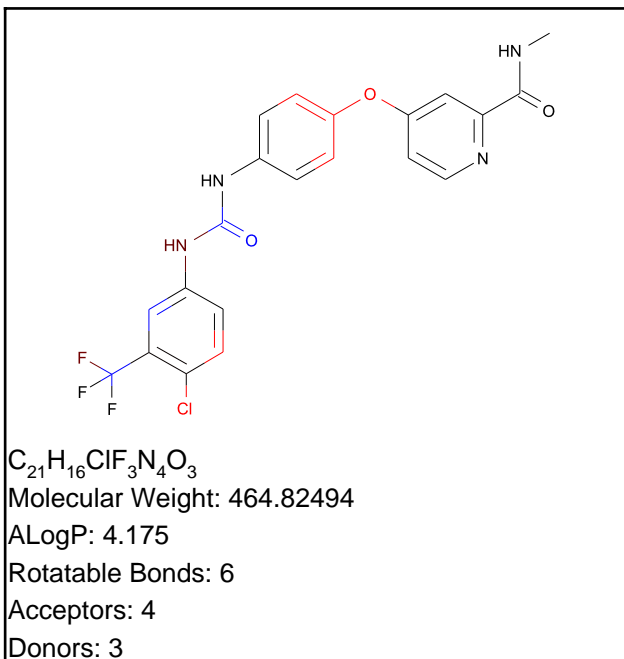

## Model Prediction

Prediction: 0.000918

Unit: g/kg\_body\_weight

Mahalanobis Distance: 12.2

Mahalanobis Distance p-value: 4.69e-009

Mahalanobis Distance: The Mahalanobis distance (MD) is a generalization of the Euclidean distance that accounts for correlations among the X properties. It is calculated as the distance to the center of the training data. The larger the MD, the less trustworthy the prediction.

Mahalanobis Distance p-value: The p-value gives the fraction of training data with an MD greater than or equal to the one for the given sample, assuming normally distributed data. The smaller the p-value, the less trustworthy the prediction. For highly non-normal X properties (e.g., fingerprints), the MD p-value is wildly inaccurate.

# TOPKAT\_Rat\_Maximum\_Tolerated\_Dose\_Gavage

## Structural Similar Compounds

| Name                        | OCHRATOXIN                                                                          | SULFISOOXAZOLE                                                                      | PENICILLIN VK                                                                       |
|-----------------------------|-------------------------------------------------------------------------------------|-------------------------------------------------------------------------------------|-------------------------------------------------------------------------------------|
| Structure                   | 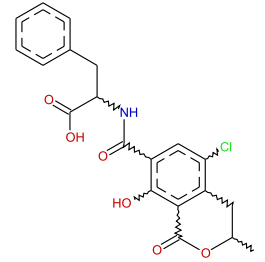 |  |  |
| Actual Endpoint (-log C)    | 6.28396                                                                             | 2.82494                                                                             | 2.54455                                                                             |
| Predicted Endpoint (-log C) | 5.12358                                                                             | 3.0705                                                                              | 3.9702                                                                              |
| Distance                    | 0.758                                                                               | 0.997                                                                               | 1.159                                                                               |
| Reference                   | NCI/NTP TR-358                                                                      | NCI/NTP TR-138                                                                      | NCI/NTP TR-336                                                                      |

## Model Applicability

Unknown features are fingerprint features in the query molecule, but not found or appearing too infrequently in the training set.

1. Molecular\_Weight out of range. Value: 464.82. Training min, max, mean, SD: 68.074, 434.63, 171.13, 85.06.
2. Num\_AromaticRings out of range. Value: 3. Training min, max, mean, SD: 0, 2, 0.5625, 0.693.
3. OPS\_PC5 out of range. Value: -3.5737. Training min, max, SD, explained variance: -3.4, 4.1587, 1.489, 0.0686.
4. OPS\_PC7 out of range. Value: -3.8342. Training min, max, SD, explained variance: -2.8003, 2.9332, 1.16, 0.0416.
5. Unknown FCFP\_2 feature: 1499521844: [\*]NC(=O)N[\*]
6. Unknown FCFP\_2 feature: -1029533685: [\*]:[c](:[\*])C(F)(F)F
7. Unknown FCFP\_2 feature: 136686699: [\*]NC

## Feature Contribution

### Top features for positive contribution

| Fingerprint | Bit/Smiles | Feature Structure | Score |
|-------------|------------|-------------------|-------|
|             |            |                   |       |

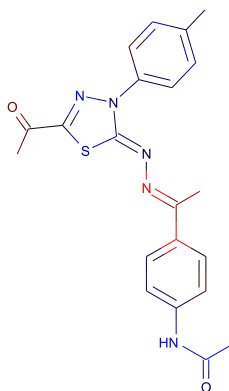

$C_{21}H_{21}N_5O_2S$

Molecular Weight: 407.48873

ALogP: 3.566

Rotatable Bonds: 5

Acceptors: 7

Donors: 1

### Model Prediction

Prediction: 0.663

Unit: g/kg\_body\_weight

Mahalanobis Distance: 23.8

Mahalanobis Distance p-value: 1.88e-024

Mahalanobis Distance: The Mahalanobis distance (MD) is a generalization of the Euclidean distance that accounts for correlations among the X properties. It is calculated as the distance to the center of the training data. The larger the MD, the less trustworthy the prediction.

Mahalanobis Distance p-value: The p-value gives the fraction of training data with an MD greater than or equal to the one for the given sample, assuming normally distributed data. The smaller the p-value, the less trustworthy the prediction. For highly non-normal X properties (e.g., fingerprints), the MD p-value is wildly inaccurate.

### Structural Similar Compounds

| Name                        | NAPHTHALIMIDE; N-HYDROXY-; O;O-DIETHYL PHOSPHOROTHIOATE | ACENOCOUMARIN | METHYL ORANGE; SODIUM SALT (Na STRIPPED) |
|-----------------------------|---------------------------------------------------------|---------------|------------------------------------------|
| Structure                   |                                                         |               |                                          |
| Actual Endpoint (-log C)    | 2.864                                                   | 2.838         | 3.707                                    |
| Predicted Endpoint (-log C) | 3.38692                                                 | 3.3152        | 2.64236                                  |
| Distance                    | 0.625                                                   | 0.627         | 0.636                                    |
| Reference                   | TXAPA9 21;315;72                                        | 29ZVAB -;3;69 | 85JCAE -;1306;86                         |

### Model Applicability

Unknown features are fingerprint features in the query molecule, but not found or appearing too infrequently in the training set.

1. All properties and OPS components are within expected ranges.
2. Unknown ECFP\_2 feature: 128986386: [\*]N=C(/C)\[c](:[\*]):[\*]
3. Unknown ECFP\_2 feature: 562081661: [\*]C(=NN=[\*])[\*]
4. Unknown ECFP\_2 feature: -819426257: [\*]C(=NN=[\*])[\*]
5. Unknown ECFP\_2 feature: 189949281: [\*]N=C\1/S[\*]=[\*]N1[\*]
6. Unknown ECFP\_2 feature: -934225701: [\*]C(=[\*])C1=N[\*][\*]S1
7. Unknown FCFP\_6 feature: 16: [\*]:[cH]:[\*]
8. Unknown FCFP\_6 feature: 1618154665: [\*][c](:[\*]):[cH]:[cH]:[\*]
9. Unknown FCFP\_6 feature: 580960234: [\*]C(=NN=[\*])[\*]
10. Unknown FCFP\_6 feature: 675799546: [\*]=C1[\*][\*]=NN1[c](:[\*]):[\*]

### Feature Contribution

#### Top features for positive contribution

| Fingerprint | Bit/Smiles | Feature Structure | Score |
|-------------|------------|-------------------|-------|
|             |            |                   |       |

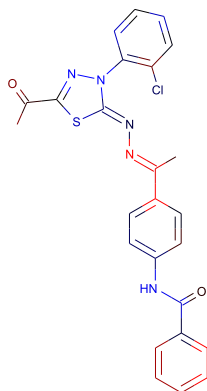

$C_{25}H_{20}ClN_5O_2S$

Molecular Weight: 489.97659

ALogP: 5.409

Rotatable Bonds: 6

Acceptors: 7

Donors: 1

### Model Prediction

Prediction: 0.703

Unit: g/kg\_body\_weight

Mahalanobis Distance: 23.8

Mahalanobis Distance p-value: 1.14e-024

Mahalanobis Distance: The Mahalanobis distance (MD) is a generalization of the Euclidean distance that accounts for correlations among the X properties. It is calculated as the distance to the center of the training data. The larger the MD, the less trustworthy the prediction.

Mahalanobis Distance p-value: The p-value gives the fraction of training data with an MD greater than or equal to the one for the given sample, assuming normally distributed data. The smaller the p-value, the less trustworthy the prediction. For highly non-normal X properties (e.g., fingerprints), the MD p-value is wildly inaccurate.

### Structural Similar Compounds

| Name                        | TALNIFLUMATE     | ACEMETACIN        | bis-OXATIN ACETATE |
|-----------------------------|------------------|-------------------|--------------------|
| Structure                   |                  |                   |                    |
| Actual Endpoint (-log C)    | 1.538            | 4.235             | 1.717              |
| Predicted Endpoint (-log C) | 2.82541          | 3.39415           | 2.40947            |
| Distance                    | 0.637            | 0.637             | 0.658              |
| Reference                   | FRPSAX 36;372;81 | ARZNAD 30;1398;80 | NIIRDN 6;609;82    |

### Model Applicability

Unknown features are fingerprint features in the query molecule, but not found or appearing too infrequently in the training set.

1. All properties and OPS components are within expected ranges.
2. Unknown ECFP\_2 feature: 128986386: [\*]\N=C(/C)\[c](:[\*]):[\*]
3. Unknown ECFP\_2 feature: 562081661: [\*]C(=NN=[\*])[\*]
4. Unknown ECFP\_2 feature: -819426257: [\*]C(=NN=[\*])[\*]
5. Unknown ECFP\_2 feature: 189949281: [\*]\N=C\1/S[\*]=[\*]N1[\*]
6. Unknown ECFP\_2 feature: -934225701: [\*]C(=[\*])C1=N[\*][\*]S1
7. Unknown FCFP\_6 feature: 16: [\*]:[cH]:[\*]
8. Unknown FCFP\_6 feature: 1618154665: [\*][c](:[\*]):[cH]:[cH]:[\*]
9. Unknown FCFP\_6 feature: 580960234: [\*]C(=NN=[\*])[\*]
10. Unknown FCFP\_6 feature: 675799546: [\*]=C1[\*][\*]=NN1[c](:[\*]):[\*]
11. Unknown FCFP\_6 feature: 71476542: [\*]:[c](:[\*])Cl

### Feature Contribution

#### Top features for positive contribution

| Fingerprint | Bit/Smiles | Feature Structure | Score |
|-------------|------------|-------------------|-------|
|             |            |                   |       |



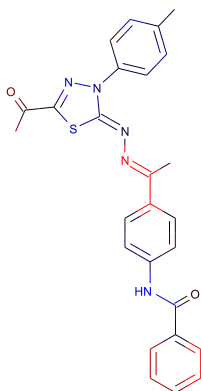

$C_{26}H_{23}N_5O_2S$

Molecular Weight: 469.55811

ALogP: 5.231

Rotatable Bonds: 6

Acceptors: 7

Donors: 1

### Model Prediction

Prediction: 0.457

Unit: g/kg\_body\_weight

Mahalanobis Distance: 23.7

Mahalanobis Distance p-value: 5.01e-024

Mahalanobis Distance: The Mahalanobis distance (MD) is a generalization of the Euclidean distance that accounts for correlations among the X properties. It is calculated as the distance to the center of the training data. The larger the MD, the less trustworthy the prediction.

Mahalanobis Distance p-value: The p-value gives the fraction of training data with an MD greater than or equal to the one for the given sample, assuming normally distributed data. The smaller the p-value, the less trustworthy the prediction. For highly non-normal X properties (e.g., fingerprints), the MD p-value is wildly inaccurate.

### Structural Similar Compounds

| Name                        | TALNIFLUMATE     | ACEMETACIN        | bis-OXATIN ACETATE |
|-----------------------------|------------------|-------------------|--------------------|
| Structure                   |                  |                   |                    |
| Actual Endpoint (-log C)    | 1.538            | 4.235             | 1.717              |
| Predicted Endpoint (-log C) | 2.82541          | 3.39415           | 2.40947            |
| Distance                    | 0.622            | 0.625             | 0.628              |
| Reference                   | FRPSAX 36;372;81 | ARZNAD 30;1398;80 | NIIRDN 6;609;82    |

### Model Applicability

Unknown features are fingerprint features in the query molecule, but not found or appearing too infrequently in the training set.

1. All properties and OPS components are within expected ranges.
2. Unknown ECFP\_2 feature: 128986386: [\*]\N=C(/C)\[c](:[\*]):[\*]
3. Unknown ECFP\_2 feature: 562081661: [\*]C(=NN=[\*])[\*]
4. Unknown ECFP\_2 feature: -819426257: [\*]C(=NN=[\*])[\*]
5. Unknown ECFP\_2 feature: 189949281: [\*]\N=C\1/S[\*]=[\*]N1[\*]
6. Unknown ECFP\_2 feature: -934225701: [\*]C(=[\*])C1=N[\*][\*]S1
7. Unknown FCFP\_6 feature: 16: [\*]:[cH]:[\*]
8. Unknown FCFP\_6 feature: 1618154665: [\*][c](:[\*]):[cH]:[cH]:[\*]
9. Unknown FCFP\_6 feature: 580960234: [\*]C(=NN=[\*])[\*]
10. Unknown FCFP\_6 feature: 675799546: [\*]=C1[\*][\*]=NN1[c](:[\*]):[\*]

### Feature Contribution

#### Top features for positive contribution

| Fingerprint | Bit/Smiles | Feature Structure | Score |
|-------------|------------|-------------------|-------|
|             |            |                   |       |



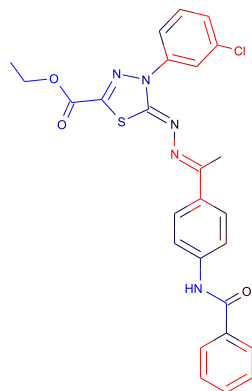

$C_{26}H_{22}ClN_5O_3S$

Molecular Weight: 520.00258

ALogP: 5.883

Rotatable Bonds: 8

Acceptors: 8

Donors: 1

### Model Prediction

Prediction: 0.903

Unit: g/kg\_body\_weight

Mahalanobis Distance: 24.6

Mahalanobis Distance p-value: 8.56e-029

Mahalanobis Distance: The Mahalanobis distance (MD) is a generalization of the Euclidean distance that accounts for correlations among the X properties. It is calculated as the distance to the center of the training data. The larger the MD, the less trustworthy the prediction.

Mahalanobis Distance p-value: The p-value gives the fraction of training data with an MD greater than or equal to the one for the given sample, assuming normally distributed data. The smaller the p-value, the less trustworthy the prediction. For highly non-normal X properties (e.g., fingerprints), the MD p-value is wildly inaccurate.

### Structural Similar Compounds

| Name                        | RESERPINE        | ACEMETACIN        | NICARDIPINE      |
|-----------------------------|------------------|-------------------|------------------|
| Structure                   |                  |                   |                  |
| Actual Endpoint (-log C)    | 3.161            | 4.235             | 3.176            |
| Predicted Endpoint (-log C) | 2.72801          | 3.39415           | 3.41318          |
| Distance                    | 0.721            | 0.726             | 0.751            |
| Reference                   | PSSCBG 11;555;80 | ARZNAD 30;1398;80 | ARZNAD 35;915;85 |

### Model Applicability

Unknown features are fingerprint features in the query molecule, but not found or appearing too infrequently in the training set.

1. All properties and OPS components are within expected ranges.
2. Unknown ECFP\_2 feature: 128986386: [\*]\N=C(/C)\[c](:[\*]):[\*]
3. Unknown ECFP\_2 feature: 562081661: [\*]C(=NN=[\*])[\*]
4. Unknown ECFP\_2 feature: -819426257: [\*]C(=NN=[\*])[\*]
5. Unknown ECFP\_2 feature: 189949281: [\*]\N=C\1/S[\*]=[\*]N1[\*]
6. Unknown ECFP\_2 feature: -934225701: [\*]C(=[\*])C1=N[\*][\*]S1
7. Unknown FCFP\_6 feature: 16: [\*]:[cH]:[\*]
8. Unknown FCFP\_6 feature: 1618154665: [\*][c](:[\*]):[cH]:[cH]:[\*]
9. Unknown FCFP\_6 feature: 580960234: [\*]C(=NN=[\*])[\*]
10. Unknown FCFP\_6 feature: 675799546: [\*]=C1[\*][\*]=NN1[c](:[\*]):[\*]
11. Unknown FCFP\_6 feature: 71476542: [\*]:[c](:[\*])Cl

### Feature Contribution

#### Top features for positive contribution

| Fingerprint | Bit/Smiles | Feature Structure | Score |
|-------------|------------|-------------------|-------|
|             |            |                   |       |

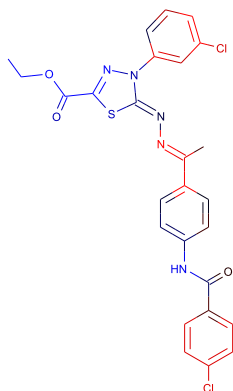

$C_{26}H_{21}Cl_2N_5O_3S$

Molecular Weight: 554.44763

ALogP: 6.547

Rotatable Bonds: 8

Acceptors: 8

Donors: 1

### Model Prediction

Prediction: 0.897

Unit: g/kg\_body\_weight

Mahalanobis Distance: 24.8

Mahalanobis Distance p-value: 7.55e-030

Mahalanobis Distance: The Mahalanobis distance (MD) is a generalization of the Euclidean distance that accounts for correlations among the X properties. It is calculated as the distance to the center of the training data. The larger the MD, the less trustworthy the prediction.

Mahalanobis Distance p-value: The p-value gives the fraction of training data with an MD greater than or equal to the one for the given sample, assuming normally distributed data. The smaller the p-value, the less trustworthy the prediction. For highly non-normal X properties (e.g., fingerprints), the MD p-value is wildly inaccurate.

### Structural Similar Compounds

| Name                        | RESERPINE        | ANAPREL         | ACEMETACIN        |
|-----------------------------|------------------|-----------------|-------------------|
| Structure                   |                  |                 |                   |
| Actual Endpoint (-log C)    | 3.161            | 2.803           | 4.235             |
| Predicted Endpoint (-log C) | 2.72801          | 2.99154         | 3.39415           |
| Distance                    | 0.737            | 0.748           | 0.790             |
| Reference                   | PSSCBG 11;555;80 | NIIRDN 6;898;82 | ARZNAD 30;1398;80 |

### Model Applicability

Unknown features are fingerprint features in the query molecule, but not found or appearing too infrequently in the training set.

1. All properties and OPS components are within expected ranges.
2. Unknown ECFP\_2 feature: 128986386: [\*]\N=C(/C)\[c](:[\*]):[\*]
3. Unknown ECFP\_2 feature: 562081661: [\*]C(=NN=[\*])[\*]
4. Unknown ECFP\_2 feature: -819426257: [\*]C(=NN=[\*])[\*]
5. Unknown ECFP\_2 feature: 189949281: [\*]\N=C\1/S[\*]=[\*]N1[\*]
6. Unknown ECFP\_2 feature: -934225701: [\*]C(=[\*])C1=N[\*][\*]S1
7. Unknown FCFP\_6 feature: 16: [\*]:[cH]:[\*]
8. Unknown FCFP\_6 feature: 1618154665: [\*][c](:[\*]):[cH]:[cH]:[\*]
9. Unknown FCFP\_6 feature: 580960234: [\*]C(=NN=[\*])[\*]
10. Unknown FCFP\_6 feature: 675799546: [\*]=C1[\*][\*]=NN1[c](:[\*]):[\*]
11. Unknown FCFP\_6 feature: 71476542: [\*]:[c](:[\*])Cl

### Feature Contribution

#### Top features for positive contribution

| Fingerprint | Bit/Smiles | Feature Structure | Score |
|-------------|------------|-------------------|-------|
|             |            |                   |       |

# Sorafenib

TOPKAT\_Rat\_Oral\_LD50

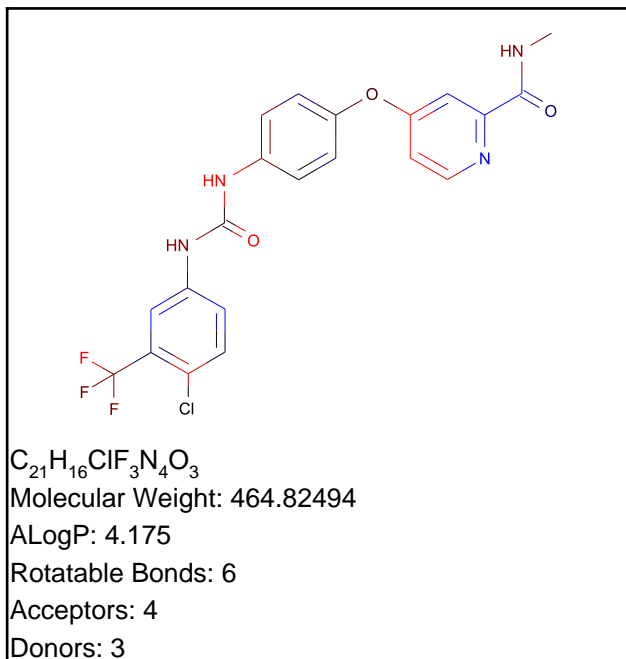

## Model Prediction

Prediction: 0.823

Unit: g/kg\_body\_weight

Mahalanobis Distance: 21

Mahalanobis Distance p-value: 1.93e-012

Mahalanobis Distance: The Mahalanobis distance (MD) is a generalization of the Euclidean distance that accounts for correlations among the X properties. It is calculated as the distance to the center of the training data. The larger the MD, the less trustworthy the prediction.

Mahalanobis Distance p-value: The p-value gives the fraction of training data with an MD greater than or equal to the one for the given sample, assuming normally distributed data. The smaller the p-value, the less trustworthy the prediction. For highly non-normal X properties (e.g., fingerprints), the MD p-value is wildly inaccurate.

## Structural Similar Compounds

| Name                        | FLUBENDAZOLE                                                                        | PHOSPHORAMIDOTHIOIC ACID; ACETIMIDOYL-; O; O-bis-(p-CHLOROPHENYL)ESTER              | BEZAFIBRATE                                                                         |
|-----------------------------|-------------------------------------------------------------------------------------|-------------------------------------------------------------------------------------|-------------------------------------------------------------------------------------|
| Structure                   | 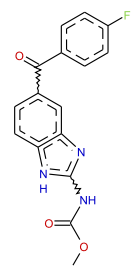 |  |  |
| Actual Endpoint (-log C)    | 2.088                                                                               | 5.006                                                                               | 1.946                                                                               |
| Predicted Endpoint (-log C) | 2.69288                                                                             | 3.23989                                                                             | 2.54395                                                                             |
| Distance                    | 0.697                                                                               | 0.703                                                                               | 0.721                                                                               |
| Reference                   | YRTMA6 9;11;78                                                                      | FMCHA2 -;C149;89                                                                    | ARZNAD 30;2023;80                                                                   |

## Model Applicability

Unknown features are fingerprint features in the query molecule, but not found or appearing too infrequently in the training set.

1. All properties and OPS components are within expected ranges.
2. Unknown FCFP\_6 feature: 16: [\*]:[cH]:[\*]
3. Unknown FCFP\_6 feature: 71476542: [\*]:[c](:[\*])Cl
4. Unknown FCFP\_6 feature: 1747237384: [\*][c](:[\*]):n:[cH]:[\*]
5. Unknown FCFP\_6 feature: 1618154665: [\*][c](:[\*]):[cH]:[cH]:[\*]
6. Unknown FCFP\_6 feature: 136686699: [\*]NC

## Feature Contribution

### Top features for positive contribution

| Fingerprint | Bit/Smiles | Feature Structure | Score |
|-------------|------------|-------------------|-------|
|             |            |                   |       |
